# Supplementary material for: Vertebrate Alpha2,8-Sialyltransferases (ST8Sia): A Teleost Perspective
Source: MDPI journal article supplement (doi:10.3390/ijms21020513), 2020-01-14
Supplement: s1 [file s1]

Supplemental Table 1: Distribution of *st8sia* genes in mammals, squamates, sharks, agnathes, Chondrostei, Holostei and Teleosts

| ORDER       |                   | SPECIES                          | <i>st8sia2</i>                      | <i>st8sia4</i> | <i>st8sia3</i> | <i>st8sia9</i><br>(3-r) | <i>st8sia1</i> | <i>st8sia5</i> | <i>st8sia7</i> | <i>st8sia6</i> | <i>st8sia8</i> |     |  |     |
|-------------|-------------------|----------------------------------|-------------------------------------|----------------|----------------|-------------------------|----------------|----------------|----------------|----------------|----------------|-----|--|-----|
| Mammals     | Hominidae         | <i>Homo sapiens</i>              | 1                                   | 1              | 1              |                         | 1              | 1              |                | 1              |                |     |  |     |
| Squamates   | Iguanidae         | <i>Anolis carolinensis</i>       | 1                                   | 1              | 1              |                         | 1              | 1              | 1              | 1              |                |     |  |     |
| Sharks      | Squaliformes      | <i>Squalus acanthias</i>         | 1                                   | 1              | 1              |                         | 1              | 1              |                | 1              |                |     |  |     |
|             | Heterodontiformes | <i>Heterodontus zebra</i>        |                                     | 1              | 1              |                         | 1              | 1              |                | 1              |                |     |  |     |
|             | Chimaeriformes    | <i>Callorhinchus milii</i>       |                                     | 1              | 1              |                         | 1              | 1              |                | 1              |                |     |  |     |
| Agnathes    |                   | <i>Lethenteron camtschaticum</i> |                                     | 1              | 1              |                         | 1              | 1              | 1              |                |                |     |  |     |
|             |                   | <i>Petromyzon marinus</i>        |                                     | 1              |                |                         | 1              |                | 1              | 1              |                |     |  |     |
|             |                   | <i>Eptatretus burgeri</i>        |                                     |                | 1              |                         |                | 1              | 1              |                |                |     |  |     |
| Chondrostei | Acipenseriformes  | <i>Acipenser sinensis</i>        | 1                                   | 1              | 1              |                         | 1              | 1              | 1              |                | 1              |     |  |     |
| Holostei    | Lepisosteiformes  | <i>Lepisosteus oculatus</i>      | 1                                   | 1              | 1              |                         | 1              | 1              | A&B            |                | 1              |     |  |     |
|             | Amiiformes        | <i>Amia calva</i>                | 1                                   | 1              |                |                         |                | 1              | 1              |                | 1              |     |  |     |
| TELEOSTS    | Otocephala        | Elopomorphes                     | <i>Anguilla anguilla</i>            | 1              | 1              | 1                       |                | -r1            | -r2            | -r1            | -r2            | A&B |  | 1   |
|             |                   |                                  | <i>Anguilla japonica</i>            |                | 1              | 1                       | 1              | -r1            | -r2            |                | 1              | 1   |  |     |
|             |                   |                                  | <i>Mastacembelus armatus</i>        | 1              |                | 1                       | 1              |                |                |                |                |     |  |     |
|             |                   | Osteoglossiformes                | <i>Scleropages formosus</i>         | 1              | 1              | 1                       | 1              | 1              | 1              | 1              |                |     |  | 1   |
|             |                   |                                  | <i>Paramormyrops kingsleyae</i>     | 1              | 1              | 1                       | 1              | 1              | 1              | 1              |                |     |  | A&B |
|             |                   |                                  | <i>Pantodon buchholzi</i>           |                | 1              | 1                       | 1              | 1              | 1              | 1              |                |     |  | 1   |
|             |                   |                                  | <i>Osteoglossum bicirrhosum</i>     | 1              | 1              | 1                       | 1              | 1              | 1              | 1              |                |     |  | 1   |
|             |                   | Clupeiformes                     | <i>Clupea harengus</i>              | 1              | 1              | 1                       |                | 1              | 1              | 1              |                |     |  | 1   |
|             |                   |                                  | <i>Denticeps clupeoides</i>         | 1              | 1              | 1                       |                | 1              | 1              | 1              |                |     |  | 1   |
|             |                   |                                  | <i>Alosa alosa</i>                  | 1              | 1              | 1                       |                | 1              | 1              | 1              |                |     |  | 1   |
|             |                   |                                  | <i>Sardina pilchardus</i>           | 1              | 1              | 1                       |                | 1              | 1              | 1              |                |     |  | 1   |
|             |                   | Cypriniformes                    | <i>Danio rerio</i>                  | 1              | 1              | 1                       |                | 1              | 1              | 1              | A&B            |     |  | 1   |
|             |                   |                                  | <i>Carassius auratus</i>            | 1              | 1              | 1                       |                | 1              | 1              | 1              | A&B            |     |  |     |
|             |                   |                                  | <i>Cyprinus carpio</i>              | 1              | -r1            | -r2                     | 1              | 1              | 1              | 1              | 1              |     |  | 1   |
|             |                   |                                  | <i>Sinocyclocheilus anshuiensis</i> | 1              | -r1            | -r2                     | 1              | 1              |                | 1              | 1              |     |  | A&B |
|             |                   | Siluriformes                     | <i>Ictalurus punctatus</i>          |                | 1              | 1                       |                | 1              | 1              | 1              |                |     |  |     |
|             |                   |                                  | <i>Pangasianodon hypophthalmus</i>  |                | 1              | 1                       |                | 1              | 1              | 1              |                |     |  | A&B |
|             |                   |                                  | <i>Clarias batrachus</i>            |                | 1              |                         |                |                |                |                |                |     |  |     |
|             |                   |                                  | <i>Tachysurus fulvidraco</i>        |                | 1              |                         |                | 1              | 1              | 1              |                |     |  | A&B |
|             |                   | Gymnotiformes                    | <i>Eigenmannia virescens</i>        |                | 1              | 1                       |                | 1              |                |                |                |     |  | 1   |
|             |                   |                                  | <i>Apteronotus albifrons</i>        |                | 1              | 1                       |                | 1              |                |                |                |     |  | 1   |
|             |                   |                                  | <i>Parapteronotus hasemani</i>      |                | 1              | 1                       |                | 1              |                |                |                |     |  | 1   |
|             |                   |                                  | <i>Electrophorus electricus</i>     | 1              | 1              | 1                       |                | 1              | 1              | 1              |                |     |  | 1   |

## Neoteleostei

|                    |                                    |     |     |   |   |   |   |   |     |  |         |
|--------------------|------------------------------------|-----|-----|---|---|---|---|---|-----|--|---------|
| Characiforme       | <i>Astyanax mexicanus</i>          | 1   |     | 1 | 1 |   | 1 | 1 |     |  | 1       |
|                    | <i>Pygocentrus nattereri</i>       | 1   |     | 1 | 1 |   | 1 | 1 |     |  | 1       |
| Perciformes        | <i>Perca flavens</i>               | 1   |     |   | 1 | 1 | 1 |   |     |  | A&B     |
|                    | <i>Perca fluviatilis</i>           | 1   |     |   | 1 | 1 | 1 | 1 |     |  | 1       |
|                    | <i>Notothenia coriiceps</i>        | 1   |     |   |   | 1 | 1 |   |     |  | A&B     |
|                    | <i>Acanthochromis polyacanthus</i> | 1   |     |   | 1 | 1 |   | 1 |     |  | 1       |
|                    | <i>Amphiprion ocellaris</i>        | 1   |     |   | 1 | 1 | 1 | 1 |     |  | A&B     |
|                    | <i>Labrus bergylta</i>             | 1   |     |   | 1 | 1 | 1 | 1 |     |  | 1       |
|                    | <i>Larimichthys crocea</i>         | 1   |     |   |   | 1 | 1 | 1 |     |  | 1       |
|                    | <i>Lates calcarifer</i>            | 1   |     |   | 1 | 1 | 1 | 1 |     |  | A&B     |
|                    | <i>Monopterus albus</i>            | 1   |     |   | 1 | 1 | 1 | 1 |     |  | 1       |
|                    | <i>Seriola dumerili</i>            | 1   |     |   | 1 | 1 | 1 |   |     |  | 1       |
|                    | <i>Seriola lalandi dorsalis</i>    | 1   |     |   | 1 | 1 | 1 | 1 |     |  | 1       |
|                    | <i>Stegastes partitus</i>          | 1   |     |   | 1 | 1 | 1 | 1 |     |  | A&B     |
|                    | <i>Gasterosteus aculeatus</i>      | 1   |     |   | 1 | 1 | 1 | 1 |     |  | 1       |
| Tetraodontiformes  | <i>Tetraodon nigroviridis</i>      | 1   |     |   | 1 | 1 | 1 | 1 |     |  | 1       |
|                    | <i>Takifugu rubripes</i>           | 1   |     |   | 1 | 1 | 1 | 1 |     |  | A&B     |
| Beloniformes       | <i>Oryzias latipes</i>             | 1   |     |   | 1 | 1 | 1 | 1 |     |  | 1       |
|                    | <i>Oryzias melastigma</i>          | 1   |     |   | 1 | 1 |   |   |     |  | 1       |
| Cichliiformes      | <i>Haplochromis burtoni</i>        | 1   |     |   | 1 | 1 | 1 | 1 |     |  | A&B     |
|                    | <i>Astatotilapia calliptera</i>    | 1   |     |   | 1 | 1 | 1 | 1 |     |  | A&B     |
|                    | <i>Maylandia zebra</i>             | 1   |     |   | 1 | 1 | 1 | 1 |     |  | 1       |
|                    | <i>Neolamprologus brichardi</i>    | 1   |     |   | 1 | 1 | 1 | 1 |     |  | 1       |
|                    | <i>Oreochromis niloticus</i>       | 1   |     |   | 1 | 1 | 1 | 1 |     |  | A,B&C   |
|                    | <i>Pundamilia nyererei</i>         | 1   |     |   | 1 | 1 | 1 | 1 |     |  | 1       |
| Cyprinodontiformes | <i>Cyprinodon variegatus</i>       | 1   |     |   | 1 | 1 | 1 | 1 |     |  | 1       |
|                    | <i>Kryptolebias marmoratus</i>     | 1   |     |   | 1 | 1 | 1 | 1 |     |  | A&B     |
|                    | <i>Nothobranchius furzeri</i>      | 1   |     |   | 1 | 1 | 1 | 1 |     |  | 1       |
|                    | <i>Xiphophorus maculatus</i>       | 1   |     |   | 1 | 1 | 1 | 1 |     |  | A,B,C&D |
|                    | <i>Austrofundulus limnaeus</i>     | 1   |     |   | 1 | 1 | 1 | 1 |     |  |         |
|                    | <i>Fundulus heteroclitus</i>       | 1   |     |   |   | 1 | 1 | 1 |     |  | A,B&C   |
|                    | <i>Poecilia latipinna</i>          | 1   |     |   | 1 | 1 | 1 |   |     |  | 1       |
|                    | <i>Poecilia reticulata</i>         | 1   |     |   | 1 | 1 | 1 | 1 |     |  | A&B     |
| Salmoniformes      | <i>Oncorhynchus mykiss</i>         | -r1 | -r2 | 1 | 1 | 1 | 1 | 1 | A&B |  | 1       |
|                    | <i>Oncorhynchus kisutch</i>        | -r1 | -r2 | 1 |   |   | 1 | 1 |     |  | A&B     |
|                    | <i>Oncorhynchus tshawytscha</i>    | -r1 | -r2 | 1 |   | 1 |   | 1 | 1   |  | 1       |
|                    | <i>Coregonus clupeaformis</i>      | -r1 | -r2 | 1 |   |   |   |   | 1   |  |         |
|                    | <i>Coregonus lavaretus</i>         | -r1 |     | 1 | 1 | 1 | 1 | 1 | 1   |  | 1       |
|                    | <i>Salmo salar</i>                 | -r1 | -r2 | 1 | 1 | 1 | 1 | 1 | A&B |  | 1       |
|                    | <i>Salmo trutta</i>                |     |     | 1 |   |   |   | 1 |     |  |         |
|                    | <i>Salvelinus alpinus</i>          | -r1 | -r2 | 1 |   | 1 |   | 1 | 1   |  | 1       |
|                    | <i>Salvelinus fontinalis</i>       |     |     | 1 |   |   |   |   | 1   |  |         |
|                    | <i>Thymallus thymallus</i>         | -r1 | -r2 | 1 |   |   |   |   | A&B |  |         |
| Esociformes        | <i>Esox lucius</i>                 |     |     | 1 | 1 | 1 | 1 | 1 | 1   |  | 1       |
|                    | <i>Umbra pygmaea</i>               |     |     | 1 | 1 | 1 | 1 | 1 | 1   |  | 1       |
