# Supplementary material for: Vertebrate Alpha2,8-Sialyltransferases (ST8Sia): A Teleost Perspective
Source: MDPI journal article supplement (doi:10.3390/ijms21020513), 2020-01-14
Supplement: s1 [file s1]

## **Vertebrate alpha2,8-sialyltransferases (ST8Sia): a teleost perspective.**

Marzia Tindara Venuto<sup>1</sup>, Mathieu Decloquement<sup>2</sup>, Joan Martorell Ribera<sup>3</sup>, Maxence Noel<sup>2</sup>, Alexander Rebl<sup>3</sup>, Virginie Cogez<sup>2</sup>, Daniel Petit<sup>4</sup>, Sebastian Peter Galuska<sup>1</sup>, Anne Harduin-Lepers<sup>2‡</sup>

<sup>1</sup>Institute of Reproductive Biology, Leibniz Institute for Farm Animal Biology (FBN), Wilhelm-Stahl-Allee 2, 18196 Dummerstorf, Germany

<sup>2</sup>Université de Lille, CNRS, UMR 8576 - UGSF - Unité de Glycobiologie Structurale et Fonctionnelle, F-59000 Lille, France

<sup>3</sup>Institute of Genome Biology Leibniz Institute for Farm Animal Biology (FBN), Wilhelm-Stahl-Allee 2, 18196, Dummerstorf, Germany

<sup>4</sup>Glycosylation et différenciation cellulaire, EA 7500, Laboratoire PEIRENE, Université de Limoges, 123 avenue Albert Thomas, 87060 Limoges Cedex, France

‡Corresponding author : Anne Harduin-Lepers, Unité de Glycobiologie Structurale et Fonctionnelle, UMR CNRS 8576, Université de Lille, Faculté des sciences et Technologies, 59655 Villeneuve d'Ascq, France. Phone: +33 320 33 62 46; Fax: +33 320 43 65 55; E-mail: [anne.harduin-lepers@univ-lille.fr](mailto:anne.harduin-lepers@univ-lille.fr)

orcid.org/0000-0002-1233-3799

**Supplementary data 2:** Multiple sequence alignments (clustalX) of ST8Sia sequences used to draw: A) supplemental figure 1; B) figure 2; C) figure 5

## A) Multiple sequence alignments (ClustalX) of 324 ST8Sia sequences used in supplemental figure 1

### Mega

CLUSTAL X (1.81) multiple sequence alignment

```
1
Latcal_3      IVFSIGENFRSLLPE----VSPILN---KHYNVCVVVGNNGSILTGSRGCGP
Perflu_3      IVFSIGENFHSLLPA----VSPILN---KHYNVCVVVGNNGSILTGSHCGA
Serdum_3      IVFSIGENFRSLLPE----VSPILN---KHYNVCVVVGNNGSILTGSRGCGP
Stepar_3      IVFSIGENFRSLLPE----ASPILN---KHYNVCVVVGNNGSILTGSRGCGP
Tetcal_3      VVFSVSNFSRLLPE----VPPILK---MHYNTCAVVGNNGSILTGSSCGA
Monalb_3      IVFSISENFRSLLPK----VSPVLN---KHYNVCVVVGNNGSILTGSRGCGP
Molmol_3      IVFSIGENFRSLLPE----TSPILN---KHFNVCAVVGNNGSILTGSRGCGA
Takrub_3      VVFSIGENFRSLLPE----TSPILQ---KHYNVCVVVGNNGSILTGSRGCGQ
Canlupfam_3   VVFSISNNFRSLLPD----VSPIVN---KHFNVCAVVGNNGSILTGSRGCGQ
Bostau_3      VVFSISNNFRSLLPD----VSPIVN---KRYNVCVVVGNNGSILTGSRGCGP
Homsap_3      VVFSISNNFRSLLPD----VSPIMN---KHYNVCVVVGNNGSILTFIQCGR
Siltro_3      VVFSISNNFRSLLPD----TSPVMN---KRYNVCVVVGNNGSILTESQCGA
Anocar_3      VVFSISNSFRMLLPD----VSPIQN---KHYNVCVVVGNNGSILVGSQCGQ
Musmus_3      VVFSISNNFRSLLPD----VSPIMN---KRYNVCVVVGNNGSILTGSRGCGQ
Pantro_3      VVFSISNNFRSLLPD----VSPIMN---KHYNVCVVVGNNGSILTGSRGCGQ
Ratnor_3      VVFSISNNFRSLLPD----VSPILN---KRYNVCVVVGNNGSILTGSRGCGQ
Galgai_3      VVFSISNNFRSLLPD----VSPILN---KHYNVCVVVGNNGSILTGSRGCGQ
Lepocu_3      VVFSISNNFRSLLPD----TSPILN---KQYNVCVVVGNNGSILTGSRGCGP
Tetnig_3      IVFSIGENFRSLLPE----VSPIRQ---KHYNVCVVVGNNGSILTGSRGCGQ
Squaca_3      VVFSVSNFSRLLPE----VPPILK---MHYNTCAVVGNNGSILTGSGCGA
Perfla_3      IVFSIGENFHSLLPA----VSPILN---KHYNVCVVVGNNGSILTGSRGCGA
Salsal_3      IVFSIGENFKSLLPE----ASPIVN---KHYNVCVVVGNNGSILTGSRGCGP
Serlaldor_3   IVFSIGENFRSLLPE----ASPILN---KHYNVCVVVGNNGSILTGSRGCGP
Treber_3      IVFSISNNLKSLLPD----TSPIRN---KHYSMCAVVGNNGSILTGSHCGP
Cynsem_3      IVFSIGENFHSLLPE----VSPIVN---KHYNVCVVVGNNGSILTGSRGCGP
Paroli_3      IVFSISNNFKSLLPD----ASPVLN---KHYSVCVVVGNNGSILTGSHCGP
Paroli_3b     IVFSIGENFRSLLPD----ASPILN---KHYNVCVVVGNNGSILTGSRGCGP
Plaste_3      IVFSISNNFKSLLPD----ASPLLN---KHYSVCVVVGNNGSILTGSHCGP
Plaste_3b     IVFSIGENFRSLLPE----ASPILN---KHYNVCVVVGNNGSILTGSRGCGP
Erpcal3       VVFSISNNFKSLLPD----ASPVLN---KHYNVCVVVGNNGSILTGSRGCGP
Calmil_3b     VVFSISNNFRMLLPD----VSPILK---MHYNTCAVVGNNGSILRGSRCGD
Hetzeb_3      IVFSVSNFSRLLPD----VPPILK---MHYNTCAVVGNNGSILIGSRCGA
Latcha_3      VVFSISNNFKSLLPD----VSPILN---KCYNVCVVVGNNGSILTDSQCGA
Anates_3      IVFSIGENFRSLLPD----ASPILN---KHYNVCVVVGNNGSILTGSRGCGP
Ampcit3       IVFSISENFRSLLPE----VSPILN---KHYNVCVVVGNNGSILTGSRGCGP
Auslim_3      IVFSIGENFRSLLPE----ASPILN---KRYNVCVVVGNNGSILTGSRGCGA
Cypvar_3      IVFSIGENFRSLLPE----VSPILN---KQYNVCVVVGNNGSILTGSRGCGA
Krymar_3      IVFSIGENFRSLLPE----VSPILD---KHYNVCVVVGNNGSILTGSRGCGA
Funhet_3      IVFSIGENFRSLLPE----ASPVLN---KRYNVCVVVGNNGSILTGSRGCGA
Gamaff3       IVFSIGDNFRSLLPD----VSPILN---MRYNVCVVVGNNGSILTGSRGCGA
Orylat_3      MVYSIGENFRSLLPE----VSPILN---RHYNVCVVVGNNGSILTGLCGA
Orenil_3      IVFSISENFRSLLPE----VSPILN---KHYNVCVVVGNNGSILTGSRGCGP
Mayzeb_3      IVFSISDNFRSLLPE----VSPILN---KHYNVCVVVGNNGSILTGSRGCGP
Punnye_3      IVFSISDNFRSLLPE----VSPILN---KHYNVCVVVGNNGSILTGSRGCGP
Punnye_3a     IVFSISDNFRSLLPE----VSPILN---KHYNVCVVVGNNGSILTGSRGCGP
Neobri_3      IVFSISDNFRSLLPE----VSPILN---KHYNVCVVVGNNGSILTGSRGCGP
Misang_3      VVFSIGENLRSLLPD----SSPIIN---KRYNVCVVVGNNGSILTGSRGCGP
Sinrhi3       IVFSIGENLRSLLPD----SSPVLN---KHFNTCAVVGNNGSILTGSRGCGA
Singra_3      VVFSIGENLRSLLPD----SSPVLN---KRFNSCAVVGNNGSILTGSRGCGT
Hapbur_3      IVFSISDNFRSLLPE----VSPILN---KHYNVCVVVGNNGSILTGSRGCGP
Astcal_3      IVFSISDNFRSLLPE----VSPILN---KHYNVCVVVGNNGSILTGSRGCGP
Notfur_3      IVFSIGENFRSLLPN----VSPILN---KHYNVCVVVGNNGSILTGSRGCGT
Cypcar_3      YVFSIGENLRSLLPD----SSPVLN---KRFNSCAVVGNNGSILTGSRGCGA
Poefor3       IVFSIGENFRSLLPE----VSPVLN---KRYNVCVVVGNNGSILTGSRGCGA
Poelat_3      IVFSIGENFRSLLPE----VSPVLN---KRYNVCVVVGNNGSILTGSRGCGA
Poeret_3      IVFSIGENFRSLLPE----VSPVLN---KRYNVCVVVGNNGSILTGSRGCGA
Angang_3      VVFSISNNFKSLLPE----SSPIVE---RRFNVCALVGNNGSVLTGSRGCGP
Xipmac_3      IVFSIGENFRSLLPE----VSPVLN---KRYNVCVVVGNNGSILTGSRGCGA
Masarm_3      IVFSIGENFYSLVPE----VSPILN---KHYNVCVVVGNNGSILSGSRGCGS
Permag_3      VVYSIGENFYSLPE----ASPILH---RHYKRCVVVGNNGSILTGSKCGT
Gnapet3       VVFSISSNFKSLLPE----SSPIQN---KHYNVCVVVGNNGSILTGSSCGP
Ostbic_3      VVFSVSSSFRSLLPD----SSPIEK---KHYNVCVVVGNNGSILTGSSCGP
```

|             |                                                     |
|-------------|-----------------------------------------------------|
| Gadmor_3    | IVFSIGQNFHSLLEPE----ASPILN---KHYNVCAVVGNSGILTGSKCGP |
| ScIfor_3    | VVFSVSGSFRSLLEPD----SSPVEK---KHYNVCAVVGNGGILTGSSCGP |
| Acapol3     | IVFSIGENFRSLLEPD----VSPILN---KHYNVCAVVGNSGILTGSRGCP |
| Ampoce_3    | IVFSIGENFRSLLEPD----VSPILN---KHYNVCAVVGNSGILTGSRGCP |
| ScIfor_3b   | VVFAISNNFKSLLEPV----TSPIQN---KHYNTCAVVGNSGILTSSHCHG |
| Ostbic_3b   | VVFAISNNFKSLLEPE----TSPIQN---KHYNTCAVVGNSGILTSSHCHG |
| Parkin_3    | VVFSISNNFKSLLEPE----SSPIQN---KHYNVCAVVGNSGILTGSSCGH |
| Amppe3      | IVFSIGENFRSLLEPD----VSPILN---KHYNVCAVVGNSGILTGSRGCP |
| Oncmyk_3    | IVFSIGENFKSLLEPE----ASPIVN---KHYNVCAVVGNSGVLTGSRGCP |
| Gasacu_3    | IVFSIGENFRSLLEPE----VSPILN---KHYNVCAVVGNSGILTGSRGCP |
| Labber_3    | IVFSIGENFRSLLEPE----VSPILN---KHYNVCAVVGNSGILTGSRGCP |
| Panbuc_3    | VVFSISSSFRSLLEPD----HSPILN---KHYNTCAVVGNSGILIGSRGCP |
| Parhas3     | VVFSIGENFRSLLEPD----SSPVLN---KRYNTCAVVGNSGILTGSRGCA |
| Cluhar_3    | VVFSIGENFRSLLEPE----LSPILN---KRYNTCAVVGNSGILTGSRGCP |
| Aloalo_3    | VVFSIGENFRSLLEPE----ISPILN---KRYNTCAVVGNSGILTGSRGCP |
| Panhyp_3    | VVFSIGENFRSLLEPD----SSPILN---KRYNTCAVVGNSGILTGSRGCA |
| Eleele_3    | VVFSIGENFRSLLEPD----SSPILN---KLYNTCAVVGNSGILTGSRGCA |
| Denclu_3    | IVFSIGENFKSLLEPE----TSPVMN---KLYNTCAVVGNSGILMGSRCGP |
| Sarpil_3    | VVFSIGENFRSLLEPE----ISPILN---KRYNTCAVVGNSGILTGSRGCP |
| Eigvir_3    | VVFSIGENFRSLLEPD----SSPILN---KRYNTCAVVGNSGILTDSRCGS |
| Aptalb_3    | VVFSIGENFRSLLEPD----SSPVLN---KRYNTCAVVGNSGILTGSRGCA |
| Sinans_3    | VVFSIGENLRSLLPD----SSPVLN---RRFNTCAVVGNSGILTGSRGCA  |
| Pygnat_3    | VVFSIGENFRSLLEPD----SSPILN---KRYNTCAVVGNSGILTGSRGCP |
| Astmex_3    | IVFSIGENFRSLLEPD----SSPVLN---KRYNTCAVVGNSGILTGSRGCP |
| Caraur_3    | VVFSIGENLRSLLPD----SSPVLN---KRFNSCAVVGNSGILTGSRGCA  |
| Danrer_3    | VVFSIGENLRSLLPD----ASPVLN---KRYNTCAVVGNSGILTGSRGCP  |
| Ictpun_3    | YVFSIGENFRSLLEPD----SSPILN---KRYNTCAVVGNSGILTGSRGCA |
| Plealt_3    | YVFSIGENFKSLLEPE----ASPVVN---KHYNVCAVVGNSGILTGSRGCA |
| Plealt_9    | YVFSISNNFKSLLEPE----TSPILN---KHYNVCAVVGNSGILTGSHCGS |
| Gasacu_9    | IVFSISNNLKSLLEPD----ASPIRN---KHYSVCAVVGNSGILTGSHCGP |
| Parkin_9    | VVFAISGNFKSLLEPD----SSPILN---KHYNMCVVGNSGILTGSRGCP  |
| Acapol_9    | IVFSISNNFKSLLEPE----TSPIHN---KHYSMCAVVGNSGILTGSHCGP |
| Larcro_9    | IVFSISNNFKSLLEPE----TSPIHN---KHYSICSVVGNSGILTGSHCGP |
| Notcor_9    | IVFSISNNLKSLLEPD----TSPIRN---KHYSMCAVVGNSGILTGSHCGP |
| Latcal_9    | IVFSISNNFKSLLEPD----TSPILN---KHYSMCAVVGNSGILTGSHCGP |
| Serlaldor_9 | IVFSISNNFKSLLEPD----TSPILN---KHYSMCAVVGNSGILTGSHCGP |
| Monalb_9    | IVFSISNSFKSLLEPD----TSPILN---KHYSMCAVVGNSGILTGSHCGP |
| Serdum_9    | IVFSISNNFKSLLEPD----TSPILN---KHYSMCAVVGNSGILTGSHCGP |
| Perflu_9    | IVFSISNNLKSLLEPD----TSPIHN---KHYSMCAVVGNSGILTGSHCGP |
| Perfla_9    | IVFSISNNLKSLLEPD----TSPIHN---KHYSMCAVVGNSGILTGSHCGP |
| Stepar_9    | IVFSISNNFKSLLEPE----TSPIHN---KHYSVCAVVGNSGILTGSHCGP |
| Molmol_9    | IVFSISNNFKSLLEPD----TSPIRN---KHYSICSVVGNSGILTGSHCGP |
| Hipcom_9    | IVFSISNNFKSLLEPD----ASPILD---KHYGTCAVVGNSGILTGSHCGS |
| Takrub_9 B  | IVFSISNNFKSLLEPD----TSPIHN---KHYSLCSVVGNSGILTGSHCGD |
| Takrub_9    | IVFSISNNFKSLLEPD----TSPIHN---KHYSLCSVVGNSGILTGSHCGA |
| Cynsem_9    | IVFSISNNFKSLLEPD----ISPILN---KHYSMCAVVGNSGILTGSHCGP |
| Scomax_9    | IVFSISNNLKSLLEPD----ISPILN---KHYSVCAVVGNSGILTGSHCGP |
| Corlav_9    | VVFSISNNLKSLLEPD----ASPIQN---KHYNVCAVVGNSGILTGSHCGP |
| Oncmyk_9    | VVFSISNNLKSLLEPD----ASPIQN---KHYNVCAVVGNSGILTGSHCGP |
| Salsal_9    | VVFSISNNLKSLLEPD----ASPIQN---KHYNVCAVVGNSGILTGSHCGP |
| Onctsh_9    | VVFSISNNLKSLLEPD----ASPIQN---KHYNVCAVVGNSGILTGSHCGP |
| Salalp_9    | VVFSISNNLKSLLEPD----ASPIQN---KHYNVCAVVGNSGILTGSHCGP |
| Ampoce_9    | IVFSISNNFKSLLEPE----TSPIHN---KHYSMCAVVGNSGILTGSHCGP |
| Amppe9      | IVFSISNNFKSLLEPE----TSPIHN---KHYSMCAVVGNSGILTGSHCGP |
| Labber_9    | IVFSISNNFKSLLEPD----TSPIRN---KHYSICSVVGNSGILTGSHCGP |
| Umppyg_3B   | IVFSIGENFQSLLEPE----VSPIVD---KHYNVCAIVGNSGILTGSRGCP |
| Esoluc_3b   | VVFSIGENFKSLLEPE----ASPIAN---KHYNVCAVVGNSGILTGSRGCP |
| Gadmor_9    | IVFSISNNFKSLLEPD----MSPIYN---KHYNVCAVVGNSGILTGSRGCP |
| Umppyg_9    | VVFSISNNLKSLLEPD----ASPIQN---KHYNVCAVVGNSGILTGSHCGP |
| Esoluc_9    | VVFSISNNLKSLLEPD----ASPIQN---KHYNVCAVVGNSGILTGSHCGP |
| Permag_9    | IVFSISNNFKSLLEPD----TSPILN---KHYSVCSVVGNSGILTDSHCGP |
| Bolpec_9    | IVFSISNNFKSLLEPD----TSPILN---KHYSVCSVVGNSGILTDSHCGP |
| Poefor9     | IVFSISNNFKSLLEPE----ASPILN---KHYSTCAVVGNSGILTGSHCGP |
| Masarm_9    | IVFSISNNFKSLLEPD----TSPILN---KHYSMCAVVGNSGILTGSHCGP |
| Angjap_9    | VVFSIGENFMSLLEPE----SSPIVPE--RRFNVCALVGNSGVLTGSRGCP |
| Poelat_9    | IVFSISNNFKSLLEPE----ASPILN---KHYSTCAVVGNSGILTGSHCGP |
| Poeret_9    | IVFSISNNFKSLLEPE----ASPILN---KHYSTCAVVGNSGILTGSHCGP |
| Xipmac_9    | IVFSISNNFKSLLEPD----ASPIRN---KHYSTCAVVGNSGILTGSHCGP |
| Hapbur_9    | IVFSISNNFKSLLEPD----TSPILN---KHYSMCAVVGNSGILTGSHCGP |
| Orylat_9    | IVFSISNNFKSLLEPE----ISPILN---KHYSVCAVVGNSGILTGSHCGP |
| Gamaff_9    | IVFSISNNFKSLLEPD----ASPIRN---KHYSTCAVVGNSGILTGSHCGP |
| Neobri_9    | IVFSISNNFKSLLEPD----TSPILN---KHYSMCAVVGNSGILTGSHCGP |
| Funhet_9    | IVFSISNNFKSLLEPE----TSPILN---KHYSTCAVVGNSGILTGSHCGP |
| Punnye_9    | IVFSISNNFKSLLEPD----TSPILN---KHYSMCAVVGNSGILTGSHCGP |
| Cypvar_9    | IVFSISNNFKSLLEPE----TSPILN---KHYSTCAVVGNSGILTGSHCGP |
| Krymar_9    | IVFSISNNFKSLLEPD----ISPIFN---KHYSMCAVVGNSGILTGSHCGP |
| Notfur_9    | IVFSISNNFKSLLEPD----TSPILN---KHYSMCAVVGNSGILTGSHCGP |

|             |                                                    |
|-------------|----------------------------------------------------|
| Notpie_9    | IVFSISNNFKSLLPD----TSPILN---KHYSMCAVVGNSGILTGSHCGP |
| Orenil_9    | IVFSISNNFKSLLPD----TSPILN---KHYSMCAVVGNSGILTGSHCGP |
| Auslim_9    | IVFSISNNFKSLLPE----TSPITN---RHYSVCAVVGNSGILTGSHCGP |
| Anates_9    | IVFSISNNFKSLLPD----TSPIHN---KHYSMCAVVGNSGILTGSHCGP |
| Astcal_9    | IVFSISNNFKSLLPD----TSPILN---KHYSMCAVVGNSGILTGSHCGP |
| Mayzeb_9    | IVFSISNNFKSLLPD----TSPILN---KHYSMCAVVGNSGILTGSHCGP |
| Orymel_9    | IVFSISNNFKSLLPD----ISPILN---KHYSVCAVVGNSGILTGSHCGP |
| Ampcit9     | IVFSISNNFKSLLPD----TSPILN---KHYSMCAVVGNSGILTGSHCGP |
| Macfas_2    | ATMNVSQNLYELLPR----TSPLKN---KHFGTCAIVGNSGVLLNSGCGQ |
| Macmul_2    | ATMNVSQNLYELLPR----TSPLKN---KHFGTCAIVGNSGVLLNSGCGQ |
| Macnem_2    | ATMNVSQNLYELLPR----TSPLKN---KHFGTCAIVGNSGVLLNSGCGQ |
| Musmus_2    | ATMNVSQNLYELLPR----TSPLKN---KHFGTCAIVGNSGVLLNSGCGQ |
| Ponabe_2    | ATMNVSQNLYELLPR----TSPLKN---KHFGTCAIVGNSGVLLNSGCGQ |
| Papanu_2    | ATMNVSQNLYELLPR----TSPLKN---KHFGTCAIVGNSGVLLNSGCGQ |
| Nomleu_2    | ATMNVSQNLYELLPR----TSPLKN---KHFRCAIVGNSGVLLNSGCGQ  |
| Pantro_2    | ATMNVSQNLYELLPR----TSPLKN---KHFGTCAIVGNSGVLLNSGCGQ |
| Latcha_2    | ATMNISQNLKLLPR----VSPLKN---RHFQCAIVGNSGILLNSNCGR   |
| Gnapet2     | ATMNISDSLYQLLPT----VSPMKN---QHRRCAIVGNSGILLNSSCGP  |
| Panbuc_2b   | ATTNVSENLQLLPS----VSPLKH---QHYGRCAIVGNSGILLNSSCGQ  |
| Ostbic_2    | ATMNVSENLQLLPK----VSPLKN---QFHKCAIVGNSGILLNSSCGK   |
| Sinrhi2     | ATTNISENLHLLPT----VSPMKN---QHYKQCAIVGNSGILLNSSCGR  |
| Hetzeb_2    | ATLNISHSLYELLPR----TSPMKN---KHFKQCAIVGNSGILLNSGCGQ |
| Hipcom_2    | PTTNISENLHLLPS----VSPLKN---RHYRLCAIVGNSGILLNSSCGS  |
| Prigla_2    | ATLNVSLSLYELLPR----ISPMKN---KHYKQCAIVGNSGILLNSGCGQ |
| Scytor_2    | ATLNISHSLYELLPR----TSPMKN---KHFKQCAIVGNSGILLNSGCGQ |
| Tetcal_2    | ATLNISYSLYELLPR----TSPMKN---KHFKQCAIVGNSGILLNSGCGQ |
| Rhityp_2    | ATLNISHSLYELLPR----TSPMKN---KHFKCAIVGNSGILLNSGCGQ  |
| Parkin_2b   | ATTNVSENLHLLPT----TSPMKN---RHYQCAIVGNSGILLNSSCGK   |
| Angang_2    | ATVNVSESLYRLPT----VSPMKD---RHYQCAIVGNSGILLNSSCGR   |
| Pygnat_2    | ATTNISENLRLPT----ASPMKN---QHIEQCAIVGNSGILLNSSCGA   |
| Parkin_2    | ATMNVASLYQLLPT----VSPMKN---QHHKCAIVGNSGILLNSSCGP   |
| Gorgor_2    | ATMNVSQNLYELLPR----TSPLKN---KHFGTCAIVGNSGVLLNSGCGQ |
| Thegel_2    | ATMNVSQNLYELLPR----TSPLKN---KHFGTCAIVGNSGVLLNSGCGQ |
| Tupchi_2    | ATMNVSQNLYELLPR----TSPLKN---KHFRCAIVGNSGVLLNSGCGQ  |
| Galgai_2    | ATMNVSQNLYELLPR----TSPLK---KQFPCAIVGNSGVLLNSGCGP   |
| Eleele_2    | ATTNISENLRLPT----VSPMKN---QHYKCAIVGNSGILLNSSCGP    |
| Danrer_2    | ATTNISENLRLPT----VSPMKN---QHYRCAIVGNSGILLNSSCGR    |
| CanlupFam_2 | ATMNVSQNLYDLLPT----TSPLKN---KHFRCAIVGNSGVLLNSGCGQ  |
| Aloalo_2    | PTMNVSENLRLPT----ASPMKN---QRHRCIAIVGNSGILLNSSCGS   |
| Astmex_2    | ATTNISENLRLPT----VSPMKN---QHYERCAIVGNSGILLNSSCGP   |
| Sinans_2    | ATTNISENLHLLPT----VSPMKN---QHYKQCAIVGNSGILLNSSCGR  |
| Scifor_2    | ATLNVPNELYELLPR----VSPLKN---QFYKCAIVGNSGILLNSSCGQ  |
| Ceraty_2    | ATMNVSQNLYELLPR----TSPLKN---KHFGTCAIVGNSGVLLNSGCGQ |
| Anocar_2    | ATMNVSQNLYALLPR----TSPLK---KHFRCAIVGNSGILLNSGCGE   |
| Anates_2    | PTTNISENLRLPT----VSPMKN---QHRRCAIVGNSGILLNSSCGH    |
| Ambic_2     | PTTNISENLRLPT----VSPMKN---QHRRCAIVGNSGILLNSSCGL    |
| Sarpil_2    | PTMNVSENLISLPT----ASPMKN---QHHKCAIVGNSGILLNSSCGS   |
| Xenlae_2    | ATMNISKNLYELLPR----TSPLKN---KHFKCAIVGNSGILLNSGCGK  |
| Cluhar_2    | PTMNVSENLRLPT----ASPMKN---QHHKCAIVGNSGILLNSSCGP    |
| Cypcar_2    | ATTNISENLNLLPT----VSPMKN---QHYKQCAIVGNSGILLNSSCGR  |
| Denclu_2    | ATTNISENLRLPT----ASPMKN---QHRLCAIVGNSGILLNSSCGP    |
| Notpie_2    | PTTNISENLRLPT----ASPMKN---QHRRCAIVGNSGILLNSSCGP    |
| Erpcal2     | ATMNISKSLYQLIPK----QSPLK---QHFKCAIVGNSGVLLNSGCGK   |
| Amical_2    | ATMNISETLYQLIPK----VSPMK---QHYRCAIVGNSGILLNSRCGE   |
| Lepocu_2    | ATMNVSETLYQLIPK----VSPMK---QHYRCAIVGNSGILLNSRCGA   |
| Homsap_2    | ATMNVSQNLYELLPR----TSPLKN---KHFGTCAIVGNSGVLLNSGCGQ |
| Bostau_2    | ATMNVSQNLYELLPR----TSPLKN---KHFGTCAIVGNSGVLLNSGCGQ |
| Caraur_2    | ATTNISENLNLLPT----VSPMKN---RHYKQCAIVGNSGILLNSSCGR  |
| Thythy_2B   | PTTNISENLRLPT----TSPMKN---QYHRRCAIVGNSGVLLNSSCGP   |
| Onctsh_2B   | PTTNISENLQLLPT----ASPMKN---QHRRCAIIGNSGILLNSSCGP   |
| Salsal_2B   | PTTNISENLQLLPT----VSPMKN---QYHRRCAIIGNSGILLNSSCGP  |
| Oncmk_2B    | PTTNISENLQLLPT----ASPMKN---QHRRCAIIGNSGILLNSSCGP   |
| Onckis_2B   | PTTNISENLQLLPT----ASPMKN---QHRRCAIIGNSGILLNSSCGP   |
| Salsal_2A   | PTTNISENLRLPT----ASPMKN---QHRRCAIVGNSGILLNSSCGP    |
| Thythy_2A   | PTTNISENLRLPT----ASPMKN---QHRRCAIVGNSGILLNSSCGP    |
| Salalp_2A   | PTTNISENLRLPT----ASPMKN---QHRRCAIVGNSGILLNSSCGP    |
| Corlav_2A   | PTTNISENLRLPT----ASPMKN---QHRRCAIVGNSGILLNSSCGP    |
| Cormar_2A   | PTTNISENLRLPT----ASPMKN---QHRRCAIVGNSGILLNSSCGP    |
| Onctsh_2A   | PTTNISENLRLPT----ASPMKN---QHRRCAIVGNSGILLNSSCGP    |
| Oncmk_2A    | PTTNISENLQLLPT----ASPMKN---QHRRCAIVGNSGIQLNSSCGP   |
| Neobri_2    | PTTNISENLRLPT----VSPMKN---QHYRCAIVGNSGILLNSSCGP    |
| Takrub_2    | PTTNVSETLYHFLPT----VSPMKN---QHRRCAIVGNSGILLNSSCGP  |
| Tetnig_2    | PTTNISETLYHFLPS----VSPMKN---QHRRCAIVGNSGVLLNSSCGP  |
| Orenil_2    | PTTNISENLRLPT----ISPMKN---QHYRCAIVGNSGILLNSSCGP    |
| Orylat_2    | PTTNISENLRLPT----VSPMKN---QHRRCAIVGNSGILLNSSCGS    |
| Krymar_2    | PTTNISENLRLPT----ASPMRR---QHRRCAIVGNSGVLLNSSCGP    |
| Notfur_2    | PTTNISENLRLPT----ASPMKN---QHRRCAIVGNSGILLNSSCGP    |

|             |                                                     |
|-------------|-----------------------------------------------------|
| Poelat_2    | PTTNISENLRYLLPT----ASPMKN---QYHRRCAIVGNSGILLNSSCGP  |
| Gadmor_2    | PTTNISENLRYLLPT----VSPMRN---QHHRKCAIVGNSGILLNSSCGQ  |
| Xipmac_2    | PTTNISENLRYLLPT----ASPMKN---QYHRRCAIVGNSGILLNSSCGP  |
| Poeret_2    | PTTNISENLRYLLPT----ASPMKN---QYHRRCAIVGNSGILLNSSCGS  |
| Astcal_2    | PTTNISENLRYLLPT----VSPMKN---QHYRRCIAIVGNSGILLNSSCGP |
| Hapbur_2    | PTTNISENLRYLLPT----VSPMKN---QHYRRCIAIVGNSGILLNSSCGP |
| Acapol_2B   | PTTNISENLRYLLPT----VSPMKN---QHHRRCIAIVGNSGILLNSSCGL |
| Ampoce_2A   | PTTNISENLRYLLPT----VSPMKN---QHHRRCIAIVGNSGILLNSSCGL |
| Acapol_2A   | PTTNISENLRYLLPT----VSPMKN---QHHRRCIAIVGNSGILLNSSCGL |
| Mayzeb_2    | PTTNISENLRYLLPT----VSPMKN---QHYRRCIAIVGNSGILLNSSCGP |
| Punnye_2    | PTTNISENLRYLLPT----VSPMKN---QHYRRCIAIVGNSGILLNSSCGP |
| Latcal_2    | PTTNISENLRYLLPT----VSPMKN---QHHRRCIAIVGNSGILLNSSCGP |
| Singra_2    | ATTNISENLRYLLPT----VSPMKN---QHYKQCAIVGNSGILLNSSCGR  |
| Auslim_2    | PTTNVSENLYRLLPT----VSPLKH---QHHRSCAIVGNSGVLLNSSCGP  |
| Monalb2     | PTTNISENLRYLLPT----VSPMKN---QHX-----TGKK----NSSCGP  |
| Ampoce_2B   | PTTNISENLRYLLPT----VSPMKN---QHHRRCIAIVGNSGILLNSSCGL |
| Chiham_2    | PTTNISENLRYLLPT----VSPMKN---QHHRCAIVGNSGILLNSSCGP   |
| Gasacu_2    | PTTNVSENLYRLLPT----ASPMKN---QHHRRCIAIVGNSGILLNSSCGP |
| Gymacu_2    | PTTNISENLRYLLPT----VSPMKN---QHHRCAIVGNSGILLNSSCGP   |
| Labber_2    | PTTNISENLRYLLPT----ASPLKN---QHHRRCIAIVGNSGILLNSSCGP |
| Cypvar_2    | PTTNISENLRYLLPT----ASPLKN---QYHKRCAIVGNSGILLNSSCGP  |
| Funhet_2    | PTTNISEDLYRLLPT----ASPMKN---QYHRRCAIVGNSGILLNSSCGP  |
| Larcro_2    | PTTNISENLRYLLPT----VSPMKN---QHHRRCIAIVGNSGILLNSSCGS |
| Paroli_2    | PTTNISENLRYLLPT----VSPMKN---QHHRRCIAIVGNSGILLNSSCGH |
| Perflu_2    | PTTNISENLRYLLPT----VSPMKN---QHHRRCIAIVGNSGILLNSSCGP |
| Serdu_2     | PTTNISENLRYLLPT----VSPMKN---QHHRRCIAIVGNSGILLNSSCGP |
| Stepar_2    | PTTNISENLRYLLPT----VSPMKN---QHHRRCIAIVGNSGILLNSSCGL |
| Notcor_2    | PTTNISENLRYLLPT----VSPMKN---QHHRCAIVGNSGILLNSSCGP   |
| Treber_2    | PTTNISENLRYLLPT----VSPMKN---QHHRCAIVGNSGILLNSSCGP   |
| Serlaldor_2 | PTTNISENLRYLLPT----ISPMKN---QHHRRCIAIVGNSGILLNSSCGP |
| Plaste_2    | PTTNISENLRYLLPT----VSPMKN---QHHRRCIAIVGNSGVLLNSSCGQ |
| Clabat_4    | ATLNVSHTLHSLLEP----VSPLKN---KRFKTCAVVGNSGVLLKSGCGK  |
| Ictpun_4A   | ATLNVSHTLHSLLEP----VSPLKN---KRFKTCAVVGNSGVLLKSGCGK  |
| Panhyp_4    | ATLNVSHTLHSLLEP----VSPLKN---KRFKTCAVVGNSGVLLKSGCGK  |
| Umbpyg_4    | ATLNVSHTLHSLLEP----VSPLKN---KRFRTCALVGNSGVLLRSGCGR  |
| Esoluc_4    | ATLNVSHTLHSLLEP----VSPLKN---KRFRTCAVVGNSGVLLNSGCGR  |
| Plealt_4    | ATLNVSHTLHSLLEP----VSPLKN---KRFRTCAVVGNSGVLLNSGCGK  |
| Onckis_4B   | ATLNVSHTLHSLLEP----VSPLKN---KRFRTCAVVGNSGVLLNSGCGK  |
| Onckis_4A   | ATLNVSHTLHSLLEP----VSPLKN---KRFRTCAVVGNSGVLLNSGCGK  |
| Onctsh_4    | ATLNVSHTLHSLLEP----VSPLKN---KRFRTCAVVGNSGVLLNSGCGK  |
| Oncmky_4    | ATLNVSHTLHSLLEP----VSPLKN---KRFRTCAVVGNSGVLLNSGCGK  |
| Corlav_4    | ATLNVSHTLHSLLEP----VSPLKN---KRFKTCAVVGNSGVLLNSGCGK  |
| Astmex_4A   | ATLNVSHTLHSLLEP----VSPLKN---KRFKTCAVVGNSGVLLKSGCGK  |
| Pygnat_4    | ATLNVSHTLHSLLEP----VSPLKN---KRFRTCAVVGNSGILLKSGCGK  |
| Aloalo_4    | ATLNVSHTLHSLLEP----VSPLKN---KRFKTCAVVGNSGVLLSSGCGQ  |
| Cluhar_4    | ATLNVSHTLHSLLEP----VSPLKN---KRFKTCAVVGNSGVLLSSGCGH  |
| Denclu_4    | ATLNVSHTLHSLLEP----VSPLKN---KRFKTCAVVGNSGILLNSGCGR  |
| Konpun4     | ATLNVSHTLHSLLEP----VSPLKN---KRFKTCAVVGNSGVLLNSGCGQ  |
| Sarpil_4    | ATLNVSHTLHSLLEP----VSPLKN---KRFKTCAVVGNSGVLLSSGCGQ  |
| Caraur_4    | ATFNISQTLHSLLEP----VSPMKN---KTFKTCAVVGNSGVLLKSGCGK  |
| Cteide_4    | ATFNVSHTLHSLLEP----VSPLKN---KMFKTCAVVGNSGILLKSGCGK  |
| Petmar_4    | ATFNVSHTLHSLLEP----VSPLKN---KMFKTCAVVGNSGILLKSGCGK  |
| Cypcar_4    | ATFNISQTLHSLLEP----VSPLKN---KTFKTCAVVGNSGVLLKSRGCGK |
| Danrer_4    | ATFNVSHTLHSLLEP----VSPLKN---KTFKTCAVVGNSGILLKSGCGK  |
| Misang_4    | ATFNVSHTLHSLLEP----VSPLKN---KMFKTCAVVGNSGILLKSRGCGK |
| Angjap_4    | ATFNVSHTLHSLLEP----VSPMKN---RRFRTCAVVGNSGVLLNSGCGP  |
| Cypcar_4A   | ATFNISQTLHSLLEP----VSPLKN---KTFKTCAVVGNSGVLLKSRGCGK |
| Angang_4    | ATLNVSRALHSLLEP----VSPMKN---RRFRTCAVVGNSGVLLNSGCGR  |
| Cypcar_4B   | ATFNVSHTLHSLLEP----VSPLKN---KTFKTCAVVGNSGVLLKSGCGK  |
| Sinans_4A   | ATFNISQTLHSLLEP----VSPLKN---KTFKTCAVVGNSGILLKSRGCGK |
| Sinans_4B   | ATFNVSHTLHSLLEP----VSPLKN---KTFKTCVVGNSGVLLKSGCGK   |
| Singra_4A   | ATFNISQTLHSLLEP----VSPLKN---KTFKTCAVVGNSGILLKSRGCGK |
| Aptalb_4    | AKLSVSHTLHSLLEP----VSPLKN---RRFRTCAVVGNSGVLLKSGCGK  |
| Eigvir_4    | ATLNVSHTLHSLLEP----VSPLKN---KRFGTCAVVGNSGVLLKSGCGK  |
| Eleele_4    | ATLNVSHTLHSLLEP----VSPLKN---KRFRTCAVVGNSGVLLKSGCGK  |
| Parhas_4    | AKLNVSHTLHSLLEP----VSPLKN---RRFRTCAVVGNSGVLLKSGCGK  |
| Scifor_4    | ATLNVSHTLHSLLEP----VSPMKN---RRFRTCAVVGNSGILLKSGCGK  |
| Gnapet4     | ATLNVSHTLHSLLEP----TSPMKN---RRFRTCAVVGNSGVLLNSGCGK  |
| Ostbic_4    | ATLNVSHTLHSLLEP----VSPLKN---KRFRTCAVVGNSGILLNSGCGK  |
| Parkin_4    | ATLNVSHTLHSLLEP----ASPMKN---RRFRTCAVVGNSGVLLNSGCGK  |
| Panbuc_4    | ATFNVSHTLHSLLEP----VSPMKN---KRFRTCAVVGNSGVLLNSGCGR  |
| Erpcal4     | ATLNVSHTLHSLLEP----VSPMKN---RRFRTCAVVGNSGILLGSGCGR  |
| Salsal_4    | ATLNVSHTLHSLLEP----VSPLKN---KRFRTCAVVGNSGVLLNSGCGK  |
| Saltru_4    | ATLNVSHTLHSLLEP----VSPLKN---KRFRTCAVVGNSGVLLNSGCGK  |
| Salalp_4    | ATLNVSHTLHSLLEP----VSPLKN---KRFRTCAVVGNSGVLLNSGCGK  |
| Salfon_4    | ATLNVSHTLHSLLEP----VSPLKN---KRFRTCAVVGNSGVLLNSGCGK  |
| Thythy_4    | ATLNVSHTLHSLLEP----VSPLKN---KRFRTCAVVGNSGVLLHSGCGK  |

|              |                                                      |
|--------------|------------------------------------------------------|
| Calmil_4     | ATLNISRNLHSLLEPE----VSPMKN---KRFNACAVVGNSGILLGSGCGK  |
| Hetzeb_4     | ATLNISHNLHSLLEPE----VSPMKN---KRFSTCAVVGNSGILLGSGCGK  |
| Rhityp_4     | ATLNISHNLHRLLEPE----VSPMKN---KRFSSCAVVGNSGILLGSGCGK  |
| Scytor_4     | ATLNISRNLHSLLEPD----VSPMKN---KRFSTCAVVGNSGILLGSGCGK  |
| Squaca_4     | ATLNISQNLHSLLEPE----VSPMKN---KRFSTCAVVGNSGILLGSGCGK  |
| Amical_4     | ATLNISHNLHSLLEPE----VSPMKN---RRFKTCAVVGNSGILINS GCGR |
| Lepocu_4     | ATLNISHDLHSLLEPE----VSPMKN---RRFKTCAVVGNSGILINS GCGR |
| Agema_4      | ATLNVSHTLHSLLEPE----VSPLKN---KRFKTCAVVGNSGVLLKSGCGK  |
| Anocar_4     | ATLNISQDLHSLLEPE----VSPMKN---RRFKMCAVVGNSGILLDSGCGK  |
| Canlupfam_4  | ATLNISQDLHSLLEPE----VSPMKN---RRFKTCAVVGNSGILLDSECGK  |
| Crigri_4     | ATLNISHDLHSLLEPE----VSPMKN---RRFKTCAVVGNSGILLDSGCGK  |
| Galgai_4     | ATLNISQDLHSLLEPE----VSPMKN---RRFKTCAVVGNSGILLDSGCGK  |
| Mesaur_4     | ATLNISHDLHSLLEPE----VSPMKN---RRFKTCAVVGNSGILLDSECGK  |
| Homsap_4     | ATLNISHDLHSLLEPE----VSPMKN---RRFKTCAVVGNSGILLDSECGK  |
| Notscuscu_4  | ATLNISQDLHSLLEPE----VSPMKN---RRFKTCAVVGNSGILLDSGCGK  |
| Psetextex_4  | ATLNISQDLHSLLEPE----VSPMKN---RRFKTCAVVGNSGILLDSGCGK  |
| Musmus_4     | ATLNISHNLHSLLEPE----VSPMKN---RRFKTCAVVGNSGILLDSGCGK  |
| Pogvit_4     | ATLNISQDLHRLLEPE----VSPMKN---RRFKTCAVVGNSGILLDSGCGK  |
| Promuc_4     | ATLNISQDLHSLLEPE----VSPMKN---RRFKTCAVVGNSGILLDSGCGK  |
| Pantro_4     | ATLNISHDLHSLLEPE----VSPMKN---RRFKTCAVVGNSGILLDSECGK  |
| Pytbiv_4     | ATLNISQDLHSLLEPE----VSPMKN---RRFKTCAVVGNSGILLDSGCGK  |
| Ratnor_2     | ATMNVSQNLYELLPR----TSPLKN---KHFQTCaIVGNSGVLLNSGCGQ   |
| Ratnor_4     | ATLNISHDLHSLLEPE----VSPMKN---RRFKTCAVVGNSGILLDSGCGK  |
| Siltro_2     | ATMNIKNLYELLPR----TSPLKN---KHFQTCaIVGNSGILLNSGCGK    |
| Siltro_4     | ATLNISQNLHSLLEPE----VSPMKS---RRFRTCAVVGNSGILLNSGCGK  |
| Susscr_4     | ATLNISQDLHSLLEPE----VSPMKN---RRFKTCAVVGNSGILLDSECGK  |
| Taegut_4     | ATLNISQDLHSLLEPE----VSPMKN---RRFKTCAVVGNSGILLNSGCGK  |
| Termextri_4M | ATLNISQDLHSLLEPE----VSPMKN---RRFKTCAVVGNSGILLDSACGK  |
| Thasirsir_4  | ATLNISQDLHRLLEPE----VSPMKN---RRFKCAVVGNSGILLDSGCGK   |
| Xenlae_4B    | ATLNISQNLHSLLEPE----VSPMKS---RRFRTCAVVGNSGILLNSGCGN  |
| Xenlae_4A    | ATLNISQNLHSLLEPE----VSPMKS---RRFRTCAVVGNSGILLSSGCGK  |
|              | 51                                                   |
| Latcal_3     | QIEKFDFVFR--CNFAP-TEIFKKDVGRRTNM TTFN-PSILEKYNNLLT   |
| Perflu_3     | QIEKFDFVFR--CNFAP-TEIFKKDVGRRTNM TTFN-PSILEKYNNLLT   |
| Serdum_3     | QIEKFDFVFR--CNFAP-TEIFKKDVGRRTNM TTFN-PSILEKYNNLLT   |
| Stepar_3     | QIEKFDFVFR--CNFAP-TEIFKKDVGRRTNM TTFN-PSILEKYNNLLT   |
| Tetcal_3     | DIDKSDFVFR--CNFAP-TETTFENDVGRKTNL TTFN-PSILEKYNNLLT  |
| Monalb_3     | QIEKFDFVFR--CNFAP-TEVFKKDVGRRTNM TTFN-PSILEKYNNLLT   |
| Molmol_3     | QIEKFDFVLR--CNFAP-TEIFKKDVGRRTNM TTFN-PSILEKYNNLLT   |
| Takrub_3     | QIDRFDFVFR--CNFAP-TEIFKKDVGRRTNM TTFN-PSILEKYNNLLT   |
| Canlupfam_3  | EIDKSDFVFR--CNFAP-TEAFQRDVGRKTNL TTFN-PSILEKYNNLLT   |
| Bostau_3     | QIDKSDFVFR--CNFAP-TEAFQRDVGRKTNL TTFN-PSILEKYNNLLT   |
| Homsap_3     | EIDKSDFVFR--CNFAP-SEAFQRDVGRKTNL TTFN-PSILEKYNNLLT   |
| Siltro_3     | EIDKADFVFR--CNFAP-TEGFQKDVGRKTNL TTFN-PSILEKYNNLLT   |
| Anocar_3     | EIDKYDFVFR--CNFAP-TEAFHKDVGRKTNL TTFN-PSILEKYNNLLT   |
| Musmus_3     | EIDKSDFVSR--CNFAP-TEAFHKDVGRKTNL TTFN-PSILEKYNNLLT   |
| Pantro_3     | EIDKSDFVFR--CNFAP-TEAFQRDVGRKTNL TTFN-PSILEKYNNLLT   |
| Ratnor_3     | EIDKSDFVFR--CNFAP-TEAFHKDVGRKTNL TTFN-PSILEKYNNLLT   |
| Galgai_3     | EIDKSDFVFR--CNFAP-TEAFQKDVGRKTNL TTFN-PSILEKYNNLLT   |
| Lepocu_3     | EIDKSDFIFR--CNFAP-TEIFHKDVGRKTNL TTFN-PSILEKYNNLLT   |
| Tetnig_3     | EIDSLDFVFR--CNFAP-TELFKKDVGRRTNM TTFN-PSILEKYNNLLT   |
| Squaca_3     | EIDKSDFVFR--CNFAP-TETFEKDVGRKTNL TTFN-PSILEKYNNLLT   |
| Perfla_3     | QIEKFDFVFR--CNFAP-TEIFKKDVGRRTNM TTFN-PSILEKYNNLLT   |
| Salsal_3     | EIEKFDFVFR--CNFAP-TEIFRDVGRRTNL TTFN-PSILEKYNNLLT    |
| Serlaldor_3  | QIEKFDFVFR--CNFAP-TEIFKKDVGRRTNM TTFN-PSILEKYNNLLT   |
| Treber_3     | EIDQADFVFR--CNFAP-TEIYSKDVGRKTNL TTFN-PSILERYNNLLT   |
| Cynsem_3     | QIEKFDFVFR--CNFAP-TEVFKKDVGRRTNM TTFN-PSILEKYNNLLT   |
| Paroli_3     | EIDQADFVFR--CNFAP-TEVYSKDVGRKTNL TTFN-PSILERYNNLLT   |
| Paroli_3b    | QIEKFDFVFR--CNFAP-TEIFKKDVGRRTNM TTFN-PSILEKYNNLLT   |
| Plaste_3     | EIDQADFVFR--CNFAP-TEVYSKDVGRKTNL TTFN-PSILERYNNLLT   |
| Plaste_3b    | QIEKFDFVFR--CNFAP-TELFKKDVGRQTNM TTFN-PSILEKYNNLLT   |
| Erpcal3      | EIDKSDFIFR--CNFAP-TEIFQKDVGRKTNL TTFN-PSILEKYNNLLT   |
| Calmil_3b    | SIDKSDFVFR--CNFAP-TEFFEKDVGRKTNL TTFN-PSILEKYNNLMA   |
| Hetzeb_3     | DIDKSDFVFR--CNFAP-TESEFKDVGRKTNL TTFN-PSILEKYNNLLT   |
| Latcha_3     | EIDQSDVFR--CNFAP-TEIFHKDVGRKTNL TTFN-PSILEKYNNLLT    |
| Anates_3     | QIEKFDFVFR--CNFAP-TEIFKKDVGRRTNL TTFN-PSILEKYNNLLT   |
| Ampcit3      | QIEKYDFVFR--CNFAP-TEIFKKDVGRRTNM TTFN-PSILEKYNNLLT   |
| Auslim_3     | HIERYDYVFR--CNFAP-TEIFRKDVGRRTNM TTFN-PSILEKYNNLLT   |
| Cypvar_3     | QIEKYDFVFR--CNFAP-TEIFKKDVGRRTNM TTFN-PSILEKYNNLLT   |
| Krymar_3     | QIERYDYVFR--CNFAP-TEIFKKDVGRRTNM TTFN-PSILEKYNNLLT   |
| Funhet_3     | QIEKYDFVFR--CNFAP-TEIFKKDVGRRTNM TTFN-PSILEKYNNLLT   |
| Gamaff3      | QIEKYDFVLR--CNFAP-TEIFKKDVGRRTNM TTFN-PSILEKYNNLLT   |
| Orylat_3     | QIEKYDFVFR--CNFAP-TEIFKKDVGRRTNM TTFN-PSILEKYNNLLT   |
| Orenil_3     | QIEKYDFVFR--CNFAP-TEIFKKDVGRRTNM TTFN-PSILEKYNNLLT   |
| Mayzeb_3     | QIEKYDFVFR--CNFAP-TEIFKKDVGRRTNM TTFN-PSILEKYNNLLT   |
| Punnye_3     | QIEKYDFVFR--CNFAP-TEIFKKDVGRRTNM TTFN-PSILEKYNNLLT   |
| Punnye_3a    | QIEKYDFVFR--CNFAP-TEIFKKDVGRRTNM TTFN-PSILEKYNNLLT   |

|             |                                                    |
|-------------|----------------------------------------------------|
| Neobri_3    | QIEKYDFVFR--CNFAP-TEIFKKDVGRRTNMTTFN-PSILEKYNNLLT  |
| Misang_3    | EIDKYDFVFR--CNFAP-TEVFRKDVGRRTNLTTFN-PSILEKYNNLLT  |
| Sinrhi3     | QIDSYDFVFR--CNFAP-TEVFRRDVGRRTNLTTFN-PSILEKYNNLLT  |
| Singra_3    | QIDSYDFVFR--CNFAP-TEAFRRDVGRRTNLTTFN-PSILEKYNNLLT  |
| Hapbur_3    | QIEKYDFVFR--CNFAP-TEIFKKDVGRRTNMTTFN-PSILEKYNNLLT  |
| Astcal_3    | QIEKYDFVFR--CNFAP-TEIFKKDVGRRTNMTTFN-PSILEKYNNLLT  |
| Notfur_3    | QIEKYDFVFR--CNFAP-TEIFKKDVGRRTNMTTFN-PSILEKYNNLLT  |
| Cypcar_3    | QIDSYDFVFR--CNFAP-TEVFRRDVGRRTNLTTFN-PSILEKYNNLLT  |
| Poefor3     | QIEKYDFVLR--CNFAP-TEIFKKDVGRRTNMTTFN-PSILEKYNNLLT  |
| Poelat_3    | QIEKYDFVLR--CNFAP-TEIFKKDVGRRTNMTTFN-PSILEKYNNLLT  |
| Poeret_3    | QIEKYDFVLR--CNFAP-TEIFKKDVGRRTNMTTFN-PSILEKYNNLLT  |
| Angang_3    | EIDRSDFVFR--CNFAP-TEIFHRDVGRRTNLTTFN-PSILEKYNNLLT  |
| Xipmac_3    | QIEKYDFVLR--CNFAP-TEIFKKDVGRRTNMTTFN-PSILEKYNNLLT  |
| Masarm_3    | QIEKFDFVFR--CNFAP-TEIFKKDVGRRTNMTTFN-PSILEKYNNLLT  |
| Permag_3    | QIDSFDFVFR--CNFAP-TEVFKKDVGRRTNMTTFN-PSILEKYNNLLT  |
| Gnapet3     | QIDKSDFVFR--CNFAP-TEVFHKDVGHKTNLTTFN-PSILEKYNNLLT  |
| Ostbic_3    | RIDSSDFVFR--CNFAP-TELFRRKDVGRKTNLTTFN-PSILEKYNNLLT |
| Gadmor_3    | QIEKFDFVFR--CNFAP-TEIFKKDVGRRTNMTTFN-PSILEKYNNLLT  |
| ScIfor_3    | RIDGSDVFR--CNFAP-TELFHRDVGRKTNLTTFN-PSILEKYNNLLT   |
| Acapol3     | QIEKFDFVFR--CNFAP-TEIFKKDVGRRTNMTTFN-PSILEKYNNLLT  |
| Ampoce_3    | QIEKFDFVFR--CNFAP-TEIFKKDVGRRTNMTTFN-PSILEKYNNLLT  |
| ScIfor_3b   | EIDRFDFVFR--CNFAP-TELFHKDVGHKTNITTFN-PSILEKYNNLLT  |
| Ostbic_3b   | EIDRFDFVFR--CNFAP-TELFHKDVGHKTNITTFN-PSILEKYNNLLT  |
| Parkin_3    | QIDESDFVFR--CNFAP-TEVFHKDVGHKTNLTTFN-PSILEKYNNLLT  |
| Amppe3      | QIEKFDFVFR--CNFAP-TEIFKKDVGRRTNMTTFN-PSILEKYNNLLT  |
| Oncmyk_3    | EIEKFDFVFR--CNFAP-TEIFHRDVGRRTNLTTFN-PSILEKYNNLLT  |
| Gasacu_3    | QIEKFDFVFR--CNFAP-TEIFKKDVGRRTNMTTFN-PSILEKYNNLLT  |
| Labber_3    | QIEKFDFVFR--CNFAP-TEVFKKDVGRQTNMTTFN-PSILEKYNNLLT  |
| Panbuc_3    | EIDRYDFVFR--CNFAP-TEAFRRKDVGRKTNLTTFN-PSILEKYNNLLT |
| Parhas3     | AIDKYDFVFR--CNFAP-TEAFRRKDVGRRTNLTTFN-PSILEKYNNLLT |
| Cluhar_3    | EIDKFDFVFR--CNFAP-TEVFRKDVGRHTNLTTFN-PSILEKYNNLLT  |
| Aloalo_3    | EIDKFDFVFR--CNFAP-TEVFRKDVGRHTNLTTFN-PSILEKYNNLLT  |
| Panhyp_3    | AIDAYDFVFR--CNFAP-TEVFRKDVGRRTNLTTFN-PSILEKYNNLLT  |
| Eleele_3    | TIDQYDFVFR--CNFAP-TEVFRKDVGRRTNLTTFN-PSILEKYNNLLT  |
| Denclu_3    | DIDKYDFVFR--CNFAP-TELFRRKDVGRRTNLTTFN-PSILEKYNNLLT |
| Sarpil_3    | EIDKFDFVFR--CNFAP-TEVFRKDVGRRTNLTTFN-PSILEKYNNLLT  |
| Eigvir_3    | AIDKYDFVFR--CNFAP-TEVFRKDVGRRTNLTTFN-PSILEKYNNLLT  |
| Aptalb_3    | AIDRYDFVFR--CNFAP-TEAFRRKDVGRRTNLTTFN-PSILEKYNNLLT |
| Sinans_3    | QIDSYDFVFR--CNFAP-TEVFRRDVGRRTNLTTFN-PSILEKYNNLLT  |
| Pygnat_3    | TIDKYDFVFR--CNFAP-TEVFRRDVGRRTNLTTFN-PSILEKYNNLLT  |
| Astmex_3    | TIDKYDFVFR--CNFAP-TEVFRRDVGRRTNLTTFN-PSILEKYNNLLT  |
| Caraur_3    | QIDSYDFVFR--CNFAP-TEIFRRDVGRRTNLTTFN-PSILEKYNNLLT  |
| Danrer_3    | EIDKYDFVFR--CNFAP-TEVFRRDVGRRTNLTTFN-PSILEKYNNLLT  |
| Ictpun_3    | AIDAYDFVFR--CNFAP-TEVFRRDVGRRTNLTTFN-PSILEKYNNLLT  |
| Plealt_3    | EIEKFDFVFR--CNFAP-TEIFRRDVGRRTNMTTFN-PSILEKYNNLLT  |
| Plealt_9    | EIDKADFVFR--CNFAP-TEVFYKDVGRKTNMTTFN-PSILEHYNNLLT  |
| Gasacu_9    | EIDQADFVFR--CNFAP-TEVYSKDVGKKTNLTTFN-PSILERYNNLLT  |
| Parkin_9    | EIDKFNFVFR--CNFAP-TEIYHRDVGRKTNMTTFN-PSILERYNNLLT  |
| Acapol_9    | EIDEADFVFR--CNFAP-TEVYSKDVGKKTNLTTFN-PSILERYNNLLT  |
| Larcro_9    | EIDQADFVFR--CNFAP-TEVYSKDVGRKTNLTTFN-PSILERYNNLLT  |
| Notcor_9    | EIDQADFVFR--CNFAP-TEIYSKDVGKKTNLTTFN-PSILERYNNLLT  |
| Latcal_9    | EIDQADFVFR--CNFAP-TEVYSKDVGRKTNLTTFN-PSILERYNNLLT  |
| Serlaldor_9 | EIDQADFVFR--CNFAP-TEVYSKDVGRKTNLTTFN-PSILERYNNLLT  |
| Monalb_9    | EIDQADFVFR--CNFAP-TEVYFKDVGRKTNLTTFN-PSILERYNNLLT  |
| Serdm_9     | EIDQADFVFR--CNFAP-TEVYSKDVGRKTNLTTFN-PSILERYNNLLT  |
| Perflu_9    | EIDQADFVFR--CNFAP-TEFYSKDVGKKTNLTTFN-PSILERYNNLLT  |
| Perfla_9    | EIDQADFVFR--CNFAP-TEFYSKDVGKKTNLTTFN-PSILERYNNLLT  |
| Stepar_9    | EIDQADFVFR--CNFAP-TEVYSKDVGKKTNLTTFN-PSILERYNNLLT  |
| Molmol_9    | EIDQADFVFR--CNFAP-TEIYSKDVGRKTNLTTFN-PSILERYNNLLT  |
| Hipcom_9    | EIDRADFVFR--CNFAP-TEVYAKDVGRKTNLTTFN-PSILERYNNLLT  |
| Takrub_9 B  | NIDQADFVFR--CNFAP-TEVYSKDVGRKTNMTTFN-PSILERYNNLLT  |
| Takrub_9    | NIDQADFVFR--CNFAP-TEVYSKDVGRKTNMTTFN-PSILERYNNLLT  |
| Cynsem_9    | EIDQADFVFR--CNFAP-TEVYSKDVGKKTNLTTFN-PSILERYNNLLT  |
| Scomax_9    | EIDQADFVFR--CNFAP-TEVYSKDVGRKTNLTTFN-PSILERYNNLLT  |
| Corlav_9    | EIDSADFVFR--CNFAP-TDSYKDVGRKTNLTTFN-PSILERYNNLLT   |
| Oncmyk_9    | EIDSADFVFR--CNFAP-TDSYKDVGRKTNLTTFN-PSILERYNNLLT   |
| Salsal_9    | EIDSSDFVFR--CNFAP-TDSYKDVGRKTNLTTFN-PSILERYNNLLT   |
| Onctsh_9    | EIDSADFVFR--CNFAP-TDSYKDVGRKTNLTTFN-PSILERYNNLLT   |
| Salalp_9    | EIDSADFVFR--CNFAP-TDSYKDVGRKTNLTTFN-PSILERYNNLLT   |
| Ampoce_9    | EIDEADFVFR--CNFAP-TEVYSKDVGKKTNLTTFN-PSILERYNNLLT  |
| Amppe9      | EIDEADFVFR--CNFAP-TEVYSKDVGKKTNLTTFN-PSILERYNNLLT  |
| Labber_9    | EIDQADFVFR--CNFAP-TEVYSKDVGRKTNLTTFN-PSILERYNNLLT  |
| Umbpyg_3B   | EIEKFDFVFR--CNFAP-TEIFRRDVGRRTNLTTFN-PSILEKYNNLLT  |
| Esoluc_3b   | EIEKFDFVFR--CNFAP-TEVFRRDVGRRTNLTTFN-PSILEKYNNLLT  |
| Gadmor_9    | EIDQADFVFR--CNFAP-TEVYKDVGRKTNMTTFN-PSILERYNNLLT   |
| Umbpyg_9    | EIDSADFVFR--CNFAP-IDSYKDVGRKTNLTTFN-PSILERYNNLLT   |
| Esoluc_9    | EIDSADFVFR--CNFAP-IESYKDVGRKTNLTTFN-PSILERYNNLLT   |

|             |                                                     |
|-------------|-----------------------------------------------------|
| Permag_9    | EIDQADFVFR--CNFAP-TEVYSKDVGKKTNLTTFN-PSILERYNNLLT   |
| Bolpec_9    | EIDQADFVFR--CNFAP-TEVYSKDVGKKTNLTTFN-PSILERYNNLLT   |
| Poefor9     | EIDQADFVFR--CNFAP-TEVYFKDVGKKTNLTTFN-PSILERYNNLLT   |
| Masarm_9    | EIDQADFVFR--CNFAP-TEVYSKDVGKKTNLTTFN-PSILERYNNLLT   |
| Angjap_9    | EIDRSDFVFR--CNFAP-TEVFHRDVGKKTNLTTFN-PSILEKYNNLLT   |
| Poelat_9    | EIDQADFVFR--CNFAP-TEVYFKDVGKKTNLTTFN-PSILERYNNLLT   |
| Poeret_9    | VIDQADFVFR--CNFAP-TEFYFKDVGKKTNLTTFN-PSILERYNNLLT   |
| Xipmac_9    | EIDQADFVFR--CNFAP-TEIYFKDVGKKTNLTTFN-PSILERYNNLLT   |
| Hapbur_9    | EIDQADFVFR--CNFAP-TDIYSKDVGKKTNLTTFN-PSILERYNNLLT   |
| Orylat_9    | EIDQADFVFR--CNFAP-TDVYSKDVGRKTNMTTFN-PSILERYNNLLT   |
| Gamaff_9    | EIDQADFVFR--CNFAP-TEVYFKDVGKKTNLTTFN-PSILERYNNLLT   |
| Neobri_9    | EIDQADFVFR--CNFAP-TDIYSKDVGKKTNLTTFN-PSILERYNNLLT   |
| Funhet_9    | EIDQADFVFR--CNFAP-TEVYSKDVGKKTNLTTFN-PSILERYNNLLT   |
| Punnye_9    | EIDQADFVFR--CNFAP-TDIYSKDVGKKTNLTTFN-PSILERYNNLLT   |
| Cypvar_9    | EIDQADFVFR--CNFAP-TDVYSKDVGKKTNLTTFN-PSILERYNNLLT   |
| Krymar_9    | EIDQADFVFR--CNFAP-TEVYSKDVGKKTNLTTFN-PSILERYNNLLT   |
| Notfur_9    | EIDQADFVFR--CNFAP-TEIYSKDVGKKTNMETFN-PSILERYNNLLT   |
| Notpie_9    | EIDQADFVFR--CNFAP-TEIYSKDVGKKTNMETFN-PSILERYNNLLT   |
| Orenil_9    | EIDQADFVFR--CNFAP-TDIYSKDVGKKTNLTTFN-PSILERYNNLLT   |
| Auslim_9    | EIDQADFVFR--CNFAP-TEIYSKDVGRKTNLTTFN-PSILERYNNLLT   |
| Anates_9    | EIDQADFVFR--CNFAP-TDVYSKDVGKKTNLTTFN-PSILERYNNLLT   |
| Astcal_9    | EIDQADFVFR--CNFAP-TDIYSKDVGKKTNLTTFN-PSILERYNNLLT   |
| Mayzeb_9    | EIDQADFVFR--CNFAP-TDIYSKDVGKKTNLTTFN-PSILERYNNLLT   |
| Orymel_9    | EIDQADFVFR--CNFAP-TDVYSKDVGRKTNMTTFN-PSILERYNNLLT   |
| Ampcit9     | EIDQADFVFR--CNFAP-TDIYSKDVGKKTNLTTFN-PSILERYNNLLT   |
| Macfas_2    | EIDAHSFVIR--CNLAP-VQEYARDVGLKTDLVTMN-PSVIQRAFEDLVN  |
| Macmul_2    | EIDAHSFVIR--CNLAP-VQEYARDVGLKTDLVTMN-PSVIQRAFEDLVN  |
| Macnem_2    | EIDAHSFVIR--CNLAP-VQEYARDVGLKTDLVTMN-PSVIQRAFEDLVN  |
| Musmus_2    | EIDTHSFVIR--CNRAP-VQEYARDVGLKTDLVTMN-PSVIQRAFEDLVN  |
| Ponabe_2    | EIDAHSFVIR--CNLAP-VQEYARDVGLKTDLVTMN-PSVIQRAFEDLVN  |
| Papanu_2    | EIDAHSFVIR--CNLAP-VQEYARDVGLKTDLVTMN-PSVIQRAFEDLVN  |
| Nomleu_2    | EIDAHSFVIR--CNLAP-VQEYARDVGLKTDLVTMN-PSVIQRAFEDLVN  |
| Pantro_2    | EIDAHSFVIR--CNLAP-VQEYARDVGLKTDLVTMN-PSVIQRAFEDLVN  |
| Latcha_2    | EIDDHQFVIR--CNLAP-VQEYASDVGKTDFVTMN-PSVIQRAFEDLVN   |
| Gnapet2     | EIDSHDFVIR--CNLAP-VEEYERDVGLRSSLVTMN-PSVVQRAFEDLAS  |
| Panbuc_2b   | EIDACDYVIR--CNLAP-VQEYVTDVGQRTSMVTMN-PSVVQRAFQDLAS  |
| Ostbic_2    | EIDSNDFVIR--CNLAP-VDEYEQDVGRRTSLVTMN-PSVVQRAFQDLAS  |
| Sinrhi2     | EIDSHDFVIR--CNLAP-VEEYATDVGLRTSLVTMN-PSVVQRAFQDLNS  |
| Hetzeb_2    | EIDAHSFVIR--CNLAP-VEEYAHDVGLKTDLVTMN-PSVVQRAFEDLKN  |
| Hipcom_2    | QIDSHDFVIR--CNLAP-VEEYADDVGHRDGLVTMN-PSVVQRAFEDLVD  |
| Prigla_2    | EIDTHEFVIR--CNLAP-VEEYAQDVGLKTDLVTMN-PSVVQRAFEDLKN  |
| Scytor_2    | EIDTHEFVIR--CNLAP-VEEYAQDVGLKTDLVTMN-PSVVQRAFEDLKN  |
| Tetcal_2    | EIDAHEFVIR--CNLAP-VEEYVQDVGMKTDLVTMN-PSVVQRAFEDLKN  |
| Rhityp_2    | EIDDHQFVIR--CNLAP-VEEYAQDVGLKTDLVTMN-PSVVQRAFEDLKN  |
| Parkin_2b   | EIDSHDFVIR--CNLAP-VQEFELDVGLRTGLVTMN-PSVVQRAFQDLGS  |
| Angang_2    | QIDSHDFVIR--CNLAP-VEEYAADVGQRTSLVTMN-PSVVQRAFEDLSS  |
| Pygnat_2    | EIDSHDFVIR--CNLAP-VEEYTNVGLRTSLVTMN-PSVVQRAFQDLNS   |
| Parkin_2    | EIDSHDFVIR--CNLAP-VEEYEHVGLRSSLVTMN-PSVVQRAFEDLAS   |
| Gorgor_2    | EIDAHSFVIR--CNLAP-VQEYARDVGPKTDLVTMN-PSVIQRAFEDLVN  |
| Thegel_2    | EIDAHSFVIR--CNLAP-VQEYARDVGLKTDLVTMN-PSVIQRAFEDLVN  |
| Tupchi_2    | EIDTHSFVIR--CNLAP-VQEYAQDVGLKTDLVTMN-PSVIQRAFEDLVN  |
| Galgal_2    | EIDTHSFVIR--CNLAP-VQEYSQDVGKTDLVTMN-PSVIQRAFEDLMN   |
| Eleele_2    | EIDSHDFIIR--CNLAP-IEHYVKDVGVRTGLVTMN-PSVVVERVFQDLSS |
| Danrer_2    | EIDSHDFVIR--CNLAP-VEEYAADVGLRTSLVTMN-PSVVQRAFQDLNS  |
| Canlupfam_2 | EIDTHSFVIR--CNLAP-VQEYGRDVGLKTDLVTMN-PSVIQRAFEDLVN  |
| Aloalo_2    | EIDSYDFVIR--CNLAP-VDEFTADVGHRTNLVTMN-PSVVQRAFQDLSS  |
| Astmex_2    | EIDSHDFVIR--CNLAP-VEEYAEVGLRSSLVTMN-PSVVQRAFQDLSS   |
| Sinans_2    | EIDSHDFVIR--CNLAP-VEEYATDVGLRTSLVTMN-PSVVQRAFQDLNS  |
| ScIfor_2    | EIDSNDFVIR--CNLAP-VEEYEQDVGHRTSLVTMN-PSVVQRAFQDLAS  |
| Ceraty_2    | EIDAHSFVIR--CNLAP-VQEYARDVGLKTDLVTMN-PSVIQRAFEDLVN  |
| Anocar_2    | EIDAHSFVIR--CNLAP-VQEYSRDVGTKMDLVTMN-PSVIQRAFEDLVN  |
| Anates_2    | EIDSHDFIIR--CNLAP-VEEYSRDVGWQTNLVTMN-PSVVQRAFQDLVS  |
| Ampbic_2    | EIDSHDFVIR--CNLAP-VEDYSRDVGRTDLVTMN-PSVVQRAFQDLVS   |
| Sarpil_2    | EIDSYDFVIR--CNLAP-VDEFSAVGHRTSLVTMN-PSVVQRAFQDLSS   |
| Xenlae_2    | EIDSHDFVIR--CNLAP-VEEYAKDVGKTNLVTMN-PSVVQRAFEDLVN   |
| Cluhar_2    | EIDAHDFVIR--CNLAP-VNEFSADVGHRTNLVTMN-PSVVQRAFQDLSS  |
| Cypcar_2    | EIDSHDFVIR--CNLAP-VEEYATDVGLRTSLVTMN-PSVVQRAFQDLNS  |
| Denclu_2    | EIDSHDFVIR--CNLAP-VEEYAADVGHRTDLVTMN-PSVVQRAFQDLAN  |
| Notpie_2    | EIDSHDFVIR--CNLAP-VEEYSQDVGWRTNLVTMN-PSVVQRAFQDLVT  |
| Erpcal2     | EIDTHEFVIR--CNLAP-VQEFASDVGIRTNLVTMN-PSVVQRAFEDLAN  |
| Amical_2    | EIDSHDFVIR--CNLAP-VEEYADDVGLRTSLVTMN-PSVVQRAFQDLVS  |
| Lepocu_2    | EIDSHDFVIR--CNLAP-VEEYRADVGRRTSLVTMN-PSVVQRAFQDLAS  |
| Homsap_2    | EIDAHSFVIR--CNLAP-VQEYARDVGLKTDLVTMN-PSVIQRAFEDLVN  |
| Bostau_2    | EIDTHSFVIR--CNLAP-VQEYARDVGLKTDLVTMN-PSVVQRAFEDLVN  |
| Caraur_2    | EIDSHDFVIR--CNLAP-VEEYATDVGLRTSLVTMN-PSVVQRAFQDLNS  |
| Thythy_2B   | EIDSHDFVIR--CNLAP-VEEYAGDVGRHTNLVTMN-PSVVQRAFQDLAS  |
| Onctsh_2B   | EIDSYDFVIR--CNLAP-VEEYAGDVGRRTNLVTMN-PSVVQRAFQDLAS  |



|             |                                                      |
|-------------|------------------------------------------------------|
| Salsal_2B   | EIDSYDFVIR--CNLAP-VEEYAGDVGRRTNLVTMN-PSVVQRAFQDLAS   |
| Oncmyk_2B   | EIDSYDFVIR--CNLAP-VEEYAGDVGRRTNLVTMN-PSVVQRAFQDLAS   |
| Onckis_2B   | EIDSYDFVIR--CNLAP-VEEYAGDVGRRTNLVTMN-PSVVQRAFQDLAS   |
| Salsal_2A   | EIDSHDFVIR--CNLAP-VEEYAGDVGRRTNLVTMN-PSVVQRAFHDLAS   |
| Thythy_2A   | EIDSHDFVIR--CNLAP-VEEYAGDVGRRTNLVTMN-PSVVQRAFHDLAS   |
| Salalp_2A   | EIDSHDFVIR--CNLAP-VEEYAGDVGRRTNLVTMN-PSVVQRAFHDLAS   |
| Corlav_2A   | EIDSHDFVIR--CNLAP-VEEYAGDVGRRTNLVTMN-PSVVQRAFHDLAS   |
| Cormar_2A   | EIDSHDFVIR--CNLAP-VEEYAGDVGRRTNLVTMN-PSVVQRAFHDLAS   |
| Onctsh_2A   | EIDSHDFVIR--CNLAP-VEEYAGDVGRRTNLVTMN-PSVVQRAFHDLAS   |
| Oncmyk_2A   | EIDSHDFVIR--CNLAP-VEEYAGDVGRRTNLVTMN-PSVVQRAFHDLAS   |
| Neobri_2    | EIDSHDFVIR--CNLAP-VEEYFQDVGWRTNLVTMN-PSVVQRAFQDLVT   |
| Takrub_2    | EIDSHDFVIR--CNLAP-VEDYYKDVGWRTNLVTMN-PSVVQRAFRLDAS   |
| Tetnig_2    | EIDSHDFVIR--CNLAP-VEDFHNDVGWRTNLVTMN-PSVVQRAFRLDAS   |
| Orenil_2    | EIDSHDFVIR--CNLAP-VEEYFQDVGWRTNLVTMN-PSVVQRAFQDLVT   |
| Orylat_2    | EIDSHDFVIR--CNLAP-VDEYSQDVGRQTNLVTMN-PSVVQRAFQDLVS   |
| Krymar_2    | EIDSHDFVIR--CNLAP-VEEYSRDVGRRDNLVTMN-PSVVQRAFQDLVT   |
| Notfur_2    | EIDSHDFVIR--CNLAP-VEEYSQDVGWRTNLVTMN-PSVVQRAFQDLVT   |
| Poelat_2    | EIDSHDFVIR--CNLAP-VEEYSQDVGRRTNLVTMN-PSVVQRAFQDLVS   |
| Gadmor_2    | EIDSHDFVIR--CNLAP-VKEYSVDVGRRTNLVTMN-PSVVQRAFQDLAS   |
| Xipmac_2    | EIDSHDFVIR--CNLAP-VEEYSQDVGRRTNLVTMN-PSVVQRAFQDLVS   |
| Poeret_2    | EIDSHDFVIR--CNLAP-VEEYSQDVGRRTNLVTMN-PSVVQRAFQDLVS   |
| Astcal_2    | EIDSHDFVIR--CNLAP-VEEYFQDVGWRTNLVTMN-PSVVQRAFQDLVT   |
| Hapbur_2    | EIDSHDFVIR--CNLAP-VEEYFQDVGWRTNLVTMN-PSVVQRAFQDLVT   |
| Acapol_2B   | EIDSHDFVIR--CNLAP-VDDYSRDVGRRTNLVTMN-PSVVQRAFQDLVS   |
| Ampoce_2A   | EIDSHDFVIR--CNLAP-VEDYSRDVGRQTNLVTMN-PSVVQRAFQDLVN   |
| Acapol_2A   | EIDSHDFVIR--CNLAP-VDDYSRDVGRRTNLVTMN-PSVVQRAFQDLVS   |
| Mayzeb_2    | EIDSHDFVIR--CNLAP-VEEYFQDVGWRTNLVTMN-PSVVQRAFQDLVT   |
| Punnye_2    | EIDSHDFVIR--CNLAP-VEEYFQDVGWRTNLVTMN-PSVVQRAFQDLVT   |
| Latcal_2    | EIDSHDFVIR--CNLAP-VEEYSRDVGWRTNLVTMN-PSVVQRAFQDLVS   |
| Singra_2    | EIDSHDFVIR--CNLAP-VEEYATDVGLRTSLVTMN-PSVVQRAFQDLNS   |
| Auslim_2    | EIDSHDFVIR--CNLAP-VEEYSEDVGRRTNLVTMN-PSVVQRAFQDLVT   |
| Monalb2     | EIDSHDFVIR--CNLAP-VEEYSRDVGRRTNLVTMN-PSVVQRAFQDLVT   |
| Ampoce_2B   | EIDSHDFVIR--CNLAP-VEDYSRDVGRQTNLVTMN-PSVVQRAFQDLVN   |
| Chiham_2    | DIDSHDFVIR--CNLAP-VDEFSQDVGRRTNLVTMN-PSVVQRAFQDLVS   |
| Gasacu_2    | DIDSHDFVIR--CNLAP-VEDYSLDVGRRTNLVTMN-PSVVQRAFQDLVS   |
| Gymacu_2    | DIDSHDFVIR--CNLAP-VDEFSQDVGRRTNLVTMN-PSVVQRAFQDLVS   |
| Labber_2    | EIDSHDFVIR--CNLAP-VADYYQDVGWRTNLVTMN-PSVVQRAFQDLVS   |
| Cypvar_2    | EIDSHDFVIR--CNLAP-VEEYSQDVGLRTNLVTMN-PSVVQRAFQDLIS   |
| Funhet_2    | EIDSHDFVIR--CNLAP-VEEYSQDVGRRTNLVTMN-PSVVQRAFQDLVS   |
| Larcro_2    | EIDSHDFVIR--CNLAP-VEEYRDVGWRTNLVTMN-PSVVQRAFQDLVS    |
| Paroli_2    | EIDSHDFVIR--CNLAP-VEEFSWDVGRRTNLVTMN-PSVVQRAFQDLVS   |
| Perflu_2    | DIDSHDFVIR--CNLAP-VEEYFQDVGWRTNLVTMN-PSVVQRAFQDLVS   |
| Serdum_2    | EIDSHDFVIR--CNLAP-VEEYSRDVGRRTNLVTMN-PSVVQRAFMDLVS   |
| Stepar_2    | EIDSHDFVIR--CNLAP-VEDYSRDVGRRTNLVTMN-PSVVQRAFQDLVS   |
| Notcor_2    | DIDSHDFVIR--CNLAP-VDEFSQDVGRRTNLVTMN-PSVVQRAFQDLVS   |
| Treber_2    | DIDSHDFVIR--CNLAP-VDEFSQDVGRRTNLVTMN-PSVVQRAFQDLVS   |
| Serlaldor_2 | EIDSHDFVIR--CNLAP-VEEYSRDVGRRTNLVTMN-PSVVQRAFMDLVS   |
| Plaste_2    | EIDSHDFVIR--CNLAP-VEEYSWDVGRRTSLVTMN-PSVVQRAFQDLVS   |
| Clabat_4    | EIDSHDFVIR--CNLAP-LAEFAEDVGLRSDFTTMN-PSVIQRYVGGLSN   |
| Ictpun_4A   | EIDSHDFVIR--CNLAP-LAEFADDVGLRSDFTTMN-PSVIQRYVGGLLN   |
| Panhyp_4    | EIDSHDFVIR--CNLAP-LAEFAEDVGLRSDFTTMN-PSVIQRYVGGLLN   |
| Umbpyg_4    | EIDSHDFVIR--CNLAP-LAEFESDVGLRSDFTTMN-PSVIQRAYGGLKN   |
| Esoluc_4    | EIDSHDFVIR--CNLAP-LAQFAEDVGLRSDFTTMN-PSVIQRAYGGLRN   |
| Plealt_4    | EIDSHDFVIR--CNLAP-LSEYADDVGRSDFTTMN-PSVIQRAYGGLKN    |
| Onckis_4B   | EIDSHDFVIR--CNLPP-LSEFAEDVGLRSDFTTMN-PSVIQRAYGGLKN   |
| Onckis_4A   | EIDSHDFVIR--CNLPP-LSEFAEDVGLRSDFTTMN-PSVIQRAYGGLKN   |
| Onctsh_4    | EIDSHDFVIR--CNLPP-LSEFAEDVGLRSDFTTMN-PSVIQRAYGGLKN   |
| Oncmyk_4    | EIDSHDFVIR--CNLPP-LSEFAEDVGLRSDFTTMN-PSVIQRAYGGLKN   |
| Corlav_4    | EIDRHDFVIR--CNLAP-LAEFAEDVGLRSDFTTMN-PSVIQRYVGGLKN   |
| Astmex_4A   | EIDGHDFVIR--CNLAP-LAEFAEDVGLKSDFTTMN-PSVIQRYVGGLRN   |
| Pygnat_4    | EIDSHDFVIR--CNLAP-LVEFAEDVGLKSDFTTMN-PSVIQRYVGGLRN   |
| Aloalo_4    | EIDSHDFVIR--CNLAP-LAEFAEDVGLRSDFTTMN-PSVIQRAYGGLRN   |
| Cluhar_4    | EIDSHDFVIR--CNLAP-LAEFAEDVGLRSDFTTMN-PSVIQRAYGGLRN   |
| Denclu_4    | EIDSHDFVIR--CNLAP-LKEFAEDVGLRSDFTTMN-PSVIHRVYGGLQK   |
| Konpun4     | EIDSHDFVIR--CNLAP-LVEFAEDVGLRSDFTTMN-PSVIQRAYSGGLRN  |
| Sarpil_4    | EIDSHDFVIR--CNLAP-LAEFADDVGLRSDFTTMN-PSVIQRAYGGLRN   |
| Caraur_4    | EIDSHGFVIR--CNLAP-LVEFADDVGLRSDFTTMN-PSVIQRAYGGLRD   |
| Cteide_4    | EIDNHDFVIR--CNLAP-LKDFADDVGLRSDFTTMN-PSVIQRYVYKGLRD  |
| Petmar_4    | EIDQHDFVIR--CNLAP-VEGYERDVGSRVDFVTMN-PSVVERTYGGGLRT  |
| Cypcar_4    | EIDSHGFVIR--CNLAP-LEEFADDVGLRSDFTTMN-PSVIQRYVYGGGLQD |
| Danrer_4    | EIDNHSFVIR--CNLAP-LEGFADDVGLRSDFTTMN-PSVIQRYVYGGGLRE |
| Misang_4    | EIDNHDFVIR--CNLAP-LEEFSDDVGLKSDFTTMN-PSVIQRYVYGGGLHN |
| Angjap_4    | EIDGHDFVIR--CNLAP-LEEFAEDVGLRSDFTTMN-PSVIQRAYGGLRN   |
| Cypcar_4A   | EIDSHGFVIR--CNLAP-LEEFADDVGLRSDFTTMN-PSVIQRYVYGGGLQD |
| Angang_4    | EIDGHDFVIR--CNLAP-LEEFAEDVGLRSDFTTMN-PSVIQRAYGGLRN   |
| Cypcar_4B   | EIDSHGFVIR--CNLAP-LEDFAEDVGLRSDFTTMN-PSVIQRYVYGGGLRD |
| Sinans_4A   | EIDSHGFVIR--CNLAP-LEEFADDVGLRSDFTTMN-PSVIQRYVYGGGLRD |

|              |                                                     |
|--------------|-----------------------------------------------------|
| Sinans_4B    | EIDSHGFVIR--CNLAP-LEEFADDVGSRSDFTTMN-PSVIPRVFGGLRD  |
| Singra_4A    | EIDSHGFVIR--CNLAP-LEEFADDVGLRSDFTTMN-PSVIPRVFGGLQD  |
| Aptalb_4     | EIDSHDFVIR--CNLAP-LAEFIKDVGLKSDFTTMN-PSVIQRMYGGLRN  |
| Eigvir_4     | EIDHDHFVIR--CNLAP-LAEFIKDVGWKSDFTTMN-PSVIQRVYHGLRN  |
| Eleele_4     | EIDSHDFVIR--CNLAP-LAKFAEDVGLKSDFTTMN-PSVIQRMYGGLRN  |
| Parhas_4     | EIDSHDFVIR--CNLAP-LAEFIKDVGLKSDFTTMN-PSVIQRMYGGLRN  |
| Scifor_4     | EIDSHDFVIR--CNLAP-LVEFSEDVGLQSDFTTMN-PSVIQRAFGGGLKN |
| Gnapet_4     | EIDSNDFVIR--CNLAP-LANFSEDVGLRSDFTTMN-PSVIQRAFGGGLRN |
| Ostbic_4     | EIDSHDFVIR--CNLAP-LVEFSEDVGLRSDFTTMN-PSVIQRVFGSLKN  |
| Parkin_4     | EIDSNDFVIR--CNLAP-LANFSEDVGLRSDFTTMN-PSVIQRAFGGGLRN |
| Panbuc_4     | EIDSHDFIIR--CNLAP-VTEFAVDVGQRSHFITMN-PSVIQRAYGSLRN  |
| Erpcal_4     | EIDNHDFVIR--CNLAP-VVEFAEDVGNRSDFITMN-PSVIQRAFGGFQN  |
| Salsal_4     | EIDSHDFVIR--CNLPP-LSEFAEDVGLRSDFTTMN-PSVIQRAYGGLKN  |
| Saltru_4     | EIDSHDFVIR--CNLPP-LSEFAEDVGLRSDFTTMN-PSVIQRAYGGLKN  |
| Salalp_4     | EIDSHDFVIR--CNLPP-LSEFAEDVGLRSDFTTMN-PSVIQRAYGGLKN  |
| Salfon_4     | EIDSHDFVIR--CNLPP-LSEFAEDVGLRSDFTTMN-PSVIQRAYGGLKN  |
| Thythy_4     | EIDSHDFVIR--CNLAP-LADFAEDVGLRSDFTTMN-PSVIQRAYGGLKN  |
| Calmil_4     | EIDSHEFVIR--CNLAP-LVEYTDVVGSKSDFTTMN-PSVVQRAFGLSQN  |
| Hetzeb_4     | EIDSHDFVIR--CNLAP-LMEYTDVGLKSDFTTMN-PSVVQRAFGLSLRS  |
| Rhityp_4     | EIDSHEFVIR--CNLAP-LVEYADDVGLKSDFTTMN-PSVVQRAFGLSLRS |
| Scytor_4     | EIDSHEFVIR--CNLAP-LVEYADDVGLKSDFTTMN-PSVVQRAFGLSLRS |
| Squaca_4     | EIDSHEFVIR--CNLAP-LVEYADDVGLKSDFTTMN-PSVVQRAFGLSLQS |
| Amical_4     | EIDSHDFVIR--CNLAP-LAEFSEDVGLRSDFITMN-PSVIQRAFGGFKN  |
| Lepocu_4     | EIDNHDFVIR--CNLAP-LAEFSEDVGLRSDFITMN-PSVIQRAFGGFKN  |
| Agema_4      | EIDSHDFVIR--CNLAP-LSEFAEDVGLRSDFTTMN-PSVIQRAYGGLLN  |
| Anocar_4     | EIDSHEFVIR--CNLAP-VVEFAADVGTKSDFITMN-PSVVQRAFGGFRN  |
| Canlupfam_4  | EIDSHNFVIR--CNLAP-VVEFAADVGTKSDFITMN-PSVVQRAFGGFRN  |
| Crigri_4     | EIDSHNFVIR--CNLAP-VVEFAADVGTKSDFITMN-PSVVQRAFGGFRN  |
| Galgai_4     | EIDTHDFVIR--CNLAP-VVEFAADVGTKSDFITMN-PSVVQRAFGGFRN  |
| Mesaur_4     | EIDSHNFVIR--CNLAP-VVEFAADVGTKSDFITMN-PSVVQRAFGGFRN  |
| Homsap_4     | EIDSHNFVIR--CNLAP-VVEFAADVGTKSDFITMN-PSVVQRAFGGFRN  |
| Notscusc_4   | EIDSHEFVIR--CNLAP-VVEFAADVGTKSDFITMN-PSVVQRAFGGFRN  |
| Psetextex_4  | EIDSHEFVIR--CNLAP-VVEFAADVGTKSDFITMN-PSVVQRAFGGFRN  |
| Musmus_4     | EIDSHNFVIR--CNLAP-VVEFAADVGTKSDFITMN-PSVVQRAFGGFRN  |
| Pogvit_4     | EIDNHDFVIR--CNLAP-VVEFAADVGTKSDFITMN-PSVVQRAFGGFRN  |
| Promuc_4     | EIDNHDFVIR--CNLAP-VVEFAADVGTKSDFITMN-PSVVQKAFGGFRN  |
| Pantro_4     | EIDSHNFVIR--CNLAP-VVEFAADVGTKSDFITMN-PSVVQRAFGGFRN  |
| Pytbiv_4     | EIDNHDFVIR--CNLAP-VVEFAADVGTKSDFITMN-PSVVQRAFGGFRN  |
| Ratnor_2     | EIDTHDFVIR--CNLAP-VQEYARDVGLKTDLVTMN-PSVIQRAFEDLVN  |
| Ratnor_4     | EIDSHNFVIR--CNLAP-VVEFAADVGTKSDFITMN-PSVVQRAFGGFRN  |
| Siltro_2     | EIDSHDFVIR--CNLAP-VEEYATDVGKTNLVTMN-PSVVQRAFEDLVN   |
| Siltro_4     | EIDSHDFVIR--CNLAP-VVEFAAHVGTKSDFITMN-PSVVQRAFGGFRN  |
| Susscr_4     | EIDSHNFVIR--CNLAP-VVEFAADVGTKSDFITMN-PSVVQRAFGGFRN  |
| Taegut_4     | EIDSHDFVIR--CNLAP-VVEYAADVGTKSDFITMN-PSVVQRAFGGFRN  |
| Termextri_4M | EIDNHDFVIR--CNLAP-VVEFAADVGTKSDFITMN-PSVVQRAFGGFRN  |
| Thasirsir_4  | EIDSHEFVIR--CNLAP-VVEFAADVGTKSDFITMN-PSVVQRAFGGFRN  |
| Xenlae_4B    | EIDSHDFVIR--CNLAP-VVEFAADVGTKSDFITMN-PSVVQRAFGGFRN  |
| Xenlae_4A    | EIDSHDFVIR--CNLAP-VVEFAADVGTKSDFITMN-PSVVQRAFGGFRN  |
|              | 101                                                 |
| Latcal_3     | VQDR-NNFFLSLKKLDGAILWIPAFFFHSTATVTRTLVDFFVEHRGQ---  |
| Perflu_3     | VQDR-NNFFLSLKKLDGAILWIPAFFFHSTATVTRTLVDFFVEHRGQ---  |
| Serdum_3     | VQDR-NNFFLSLKKLDGAILWIPAFFFHSTATVTRTLVDFFVEHRGQ---  |
| Stepar_3     | VQDR-NNFFLSLKKLDGAILWIPAFFFHSTATVTRTLVDFFVEHRGQ---  |
| Tetcal_3     | IQDR-NKFFLNKRLDGAAILWIPAFFFHSTAPVTRTLVDFFIEHRAQ---  |
| Monalb_3     | VQDR-NNFFLSLKKLDGAAILWIPAFFFHSTATVTRTLVDFFVEHKGQ--- |
| Molmol_3     | VQDR-NNFFLSLKKLDGAILWIPAFFFHSTATVTRTLVDFFVEHRGQ---  |
| Takrub_3     | VQDR-NNFFLSLKKLDTTILWIPAFFFHSTATVTRTLVDFFVEHRGQ---  |
| Canlupfam_3  | IQDR-NNFFLSLKKLDGAILWIPAFFFHSTATVTRTLVDFFVEHRGQ---  |
| Bostau_3     | IQDR-NNFFLSLKKLDGAILWIPAFFFHSTATVTRTLVDFFVEHRGQ---  |
| Homsap_3     | IQDR-NNFFLSLKKLDGAILWIPAFFFHSTATVTRTLVDFFVEHRGQ---  |
| Siltro_3     | IQDR-NNFFLSLKKLDGAILWIPAFFFHSTASVTRTLVDFFVEHRDQ---  |
| Anocar_3     | IQDR-NNFFLSLKKLDGAILWIPAFFFHSTATITRTLVDFFIEHRAQ---  |
| Musmus_3     | IQDR-NNFFLSLKKLDGAILWIPAFFFHSTATVTRTLVDFFVEHRGQ---  |
| Pantro_3     | IQDR-NNFFLSLKKLDGAILWIPAFFFHSTATVTRTLVDFFVEHRGQ---  |
| Ratnor_3     | IQDR-NNFFLSLKKLDGAILWIPAFFFHSTATVTRTLVDFFVEHRGQ---  |
| Galgai_3     | IQDR-NNFFLSLKKLDGAILWIPAFFFHSTATVTRTLVDFFVEHRGQ---  |
| Lepocu_3     | IQDR-NNFFLSLKKLDGAILWIPAFFFHSTATVTRTLVDFFVEHKGQ---  |
| Tetnig_3     | VQDR-NNFFLSLKKLDPAAILWIPAFFFHSTATVTRTLVDFFVEPRGQ--- |
| Squaca_3     | IQDR-NKFFLNKRLDGAAILWIPAFFFHSTAPVTRTLVDFFMEHRAQ---  |
| Perfla_3     | VQDR-NNFFLSLKKLDGAILWIPAFFFHSTATVTRTLVDFFVEHRGQ---  |
| Salsal_3     | IQDR-NNFFLSLKKLDRAILWIPAFFFHSTATVTRTLVDFFVEHRGQ---  |
| Serlaldor_3  | VQDR-NNFFLSLKKLDGAILWIPAFFFHSTATVTRTLVDFFVEHRGQ---  |
| Treber_3     | IQDR-NNFFLNKKLEGAILWIPAFFLHSTATVTRTLVDFFVEHKGQ---   |
| Cynsem_3     | VQDR-NNFFLSLKKLDNAILWIPAFFFHSTATVTRTLVDFFVEHRGQ---  |
| Paroli_3     | IQDR-NNFFLNKKLEGAILWIPAFFLHSTATVTRTLVDFFVEHKGQ---   |
| Paroli_3b    | VQDR-NNFFLSLKKLDNAILWIPAFFFHSTATVTRTLVDFFVEHRGQ---  |
| Plaste_3     | IQDR-NNFFLNKKLESAILWIPAFFLHSTATVTRTLVDFFVEHKGQ---   |

|             |                                                      |
|-------------|------------------------------------------------------|
| Plaste_3b   | VQDR-NNFFLSLKKLDSAILWIPAFFFHSTSATVTRTLVDFFVEHRGQ---  |
| Ercpal3     | IQDR-NNFFLSLKKLDGAILWIPAFFFHSTSATVTRTLVDFFVEHKGQ---  |
| Calmil_3b   | IQDR-NKFFLNKKLDGAILWIPAFFFHSSALVTRTLVDFFVEHRRQ---    |
| Hetzeb_3    | IQDR-NKFFLNKKLDGAILWIPAFFFHSTSAPVTRTLVDFFIEHRAQ---   |
| Latcha_3    | IQDR-NNFFLSLKKLDGAILWIPAFFFHSTSATVTRTLVDFFVEHKGQ---  |
| Anates_3    | VQDR-NNFFLSLKKLDGAILWIPAFFFHSTSATVTRTLVDFFVEHRGQ---  |
| Ampcit3     | VQDR-NNFFLSLKKLDGAILWIPAFFFHSTSATVTRTLVDFFVEHRDQ---  |
| Auslim_3    | VQDR-NNFFLSLKKLDGAILWIPAFFFHSTSATVTRTLVDFFVEHRGQ---  |
| Cypvar_3    | VQDR-NNFFLSLKKLDRAILWIPAFFFHSTSATVTRTLVDFFVEHRGQ---  |
| Krymar_3    | VQDR-NNFFLSLKKLDSAILWIPAFFFHSTSATVTRTLVDFFVEHRGQ---  |
| Funhet_3    | VQDR-NNFFLSLKKLDRAILWIPAFFFHSTSATVTRTLVDFFVEHRGQ---  |
| Gamaff3     | VQDR-NNFFLSLKKLDRAILWIPAFFFHSTSATVTRTLVDFFVEHRGQ---  |
| Orylat_3    | VQDR-NNFFLSLKKLDGAILWIPAFFFHSTSATVTRTLVDFFVEHRGQ---  |
| Orenil_3    | VQDR-NNFFLSLKKLDGAILWIPAFFFHSTSATVTRTLVDFFVEHRGQ---  |
| Mayzeb_3    | VQDR-NNFFLSLKKLDGAILWIPAFFFHSTSATVTRTLVDFFVEHKGQ---  |
| Punnye_3    | VQDR-NNFFLSLKKLDGAILWIPAFFFHSTSATVTRTLVDFFVEHKGQ---  |
| Punnye_3a   | VQDR-NNFFLSLKKLDGAILWIPAFFFHSTSATVTRTLVDFFVEHKGQ---  |
| Neobri_3    | VQDR-NNFFLSLKKLDGAILWIPAFFFHSTSATVTRTLVDFFVEHKGQ---  |
| Misang_3    | IQDR-NNFFLSLKKLDGAILWIPAFFFHSTSATVTRTLVDFFVEHKGQ---  |
| Sinrhi3     | IQDR-NNFFLSLKKLDGAILWIPAFFFHSTSATVTRTLVDFFVEHKGQ---  |
| Singra_3    | IQDR-NNFFLSLKKLDGAILWIPAFFFHSTSATVTRTLVDFFVEHKGQ---  |
| Hapbur_3    | VQDR-NNFFLSLKKLDGAILWIPAFFFHSTSATVTRTLVDFFVEHKGQ---  |
| Astcal_3    | VQDR-NNFFLSLKKLDGAILWIPAFFFHSTSATVTRTLVDFFVEHKGQ---  |
| Notfur_3    | VQDR-NNFFLSLKKLDGAVLWIPAFFFHSTSATVTRTLVDFFVEHRGQ---  |
| Cypcar_3    | IQDR-NNFYLSLKKLDGAILWIPAFFFHSTSATVTRTLVDFFVEHKGQ---  |
| Poefor3     | VQDR-NNFFLSLKKLDRAILWIPAFFFHSTSATVTRTLVDFFVEHRGQ---  |
| Poelat_3    | VQDR-NNFFLSLKKLDRAILWIPAFFFHSTSATVTRTLVDFFVEHRGQ---  |
| Poeret_3    | VQDR-NNFFLSLKKLDTAILWIPAFFFHSTSATVTRTLVDFFVEHRGQ---  |
| Angang_3    | IQDR-NNFFLSLKKLDGAVLWIPAFFFHSTSATVTRTLVDFFVEHRGQ---  |
| Xipmac_3    | VQDR-NNFFLSLKKLDRAILWIPAFFFHSTSATVTRTLVDFFVEHRGQ---  |
| Masarm_3    | VQDR-NNFFLSLKKLDGAILWIPAFFFHSTSATVTRTLVDFFVEHRGQ---  |
| Permag_3    | VQDR-NNFFLSLKKLDGAILWIPAFFFHSTSATVTRTLVDFFVEHRGQ---  |
| Gnapet3     | IQDR-NNFFLSLKKLDSAILWIPAFFFHSTSATVTRTLVDFFVEHKGQ---  |
| Ostbic_3    | IQDR-NNFFLSLKKLDDAILWIPAFFFHSTSATVTRTLVDFFVEHKDQ---  |
| Gadmor_3    | VQDR-NNFFLSLKKLDGAILWIPAFFFHSTSATVTRTLVDFFVEHRGQ---  |
| Scfor_3     | IQDR-NNFFLSLKKLDDAILWIPAFFFHSTSATVTRTLVDFFVEHKGQ---  |
| Acapol3     | VQDR-NNFFLSLKKLDGAILWIPAFFFHSTSATVTRTLVDFFVEHRGQ---  |
| Ampoce_3    | VQDR-NNFFLSLKKLDGAILWIPAFFFHSTSATVTRTLVDFFVEHRGQ---  |
| Scfor_3b    | IQDR-NNFFLSLKKLDGAILWIPAFFFHSTSATVTRTLVDFFVEHKGQ---  |
| Ostbic_3b   | IQDR-NNFFLSLKKLDGAILWIPAFFFHSTSATVTRTLVDFFVEHKGQ---  |
| Parkin_3    | IQDR-NNFFLSLKKLDSAILWIPAFFFHSTSATVTRTLVDFFVEHKGQ---  |
| Ampper3     | VQDR-NNFFLSLKKLDGAILWIPAFFFHSTSATVTRTLVDFFVEHRGQ---  |
| Oncmyk_3    | LQDR-NNFFLSLKKLDGAILWIPAFFFHSTSATVTRTLVDFFVEHRGQ---  |
| Gasacu_3    | VQDR-NNFFLSLKKLDGAILWIPAFFFHSTSATVTRTLVDFFVEHRGQ---  |
| Labber_3    | VQDR-NNFFLSLKKLDGAILWIPAFFFHSTSATVTRTLVDFFVEHRGQ---  |
| Panbuc_3    | IQDR-NNFFLSLKKLDGAVLWIPAFFFHSTSATVTRTLVDFFVEHQGQ---  |
| Parhas3     | IQDR-NNFFLSLKKLDGAILWIPAFFFHSTSATVTRTLVDFFVEHRGQ---  |
| Cluhar_3    | IQDR-NNFFLSLKKLDGAILWIPAFFFHSTSATVTRTLVDFFVEHKGQ---  |
| Aloalo_3    | IQDR-NNFFLSLKKLDGAILWIPAFFFHSTSATVTRTLVDFFVEHKGQ---  |
| Panhyp_3    | IQDR-NNFFLSLKKLDGAILWIPAFFFHSTSATVTRTLVDFFVEHRGQ---  |
| Eleele_3    | IQDR-NNFFLSLKKLDGAILWIPAFFFHSTSATVTRTLVDFFVEHRGQ---  |
| Denclu_3    | IQDR-NNFFLSLKKLDGAVLWIPAFFFHSTSATVTRTLVDFFVEHKGQ---  |
| Sarpil_3    | IQDR-NNFFLSLKKLDGAILWIPAFFFHSTSATVTRTLVDFFVEHKGQ---  |
| Eigvir_3    | IQDR-NNFFLSLKKLDGAILWIPAFFFHSTSATVTRTLVDFFVEHQGQ---  |
| Aptalb_3    | IQDR-NNFFLSLKKLDGAILWIPAFFFHSTSATVTRTLVDFFVEHRGQ---  |
| Sinans_3    | IQDR-NNFYLSLKKLDGAILWIPAFFFHSTSATVTRTLVDFFVEHKGQ---  |
| Pygnat_3    | IQDR-NNFFLSLKKLDRAILWIPAFFFHSTSATVTRTLVDFFVEHRGQ---  |
| Astmex_3    | IQDR-NNFFLSLKKLDRAVLWIPAFFFHSTSATVTRTLVDFFVEHQGQ---  |
| Caraur_3    | IQDR-NNFYLSLKKLDGAILWIPAFFFHSTSATVTRTLVDFFVEHKGQ---  |
| Danrer_3    | IQDR-NNFFLSLKKLDGAILWIPAFFFHSTSATVTRTLVDFFVEHKGQ---  |
| Ictpun_3    | IQDR-NNFFLSLKKLDGAILWIPAFFFHSTSATVTRTLVDFFVEHRGQ---  |
| Plealt_3    | IQDR-NNFFLSLKKLDGAILWIPAFFFHSTSATVTRTLVDFFVEHRGQ---  |
| Plealt_9    | IQDR-NNFFLNKKKLEGAILWIPAFFLHSTSATVTRTLVDFFVEHKGQ---  |
| Gasacu_9    | IQDR-NNFFLNKKKLEGAILWIPAFFLHSTSATVTRTLVDFFVEHKGQ---  |
| Parkin_9    | IQDR-NNFFLNKKKLEGAILWIPAFFFHSTSAPVTRTLIDFFIEHKDQ---  |
| Acapol_9    | IQDR-NNFFLNKKKLEGAILWIPAFFLHSTSATVTRTLVDFFVEHKGQ---  |
| Larcro_9    | IQDR-NNFFLNKKKLEGAILWIPAFFLHSTSATVTRTLVDFFVEHKGQ---  |
| Notcor_9    | IQDR-NNFFLNKKKLEGAILWIPAFFLHSTSATVTRTLVDFFVEHKGQ---  |
| Latcal_9    | IQDR-NNFFLNKKKLEGAILWIPAFFLHSTSATVTRTLVDFFVEHKGQ---  |
| Serlaldor_9 | IQDR-NNFFLNKKKLEGAILWIPAFFLHSTSATVTRTLVDFFVEHKGQ---  |
| Monalb_9    | IQDR-NNFFLSLKKKLEGAILWIPAFFLHSTSATVTRTLVDFFVEHKGQ--- |
| Serdum_9    | IQDR-NNFFLNKKKLEGAILWIPAFFLHSTSATVTRTLVDFFVEHKGQ---  |
| Perflu_9    | IQDR-NNFFLNKKKLEGAILWIPAFFLHSTSATVTRTLVDFFVEHKKQ---  |
| Perfla_9    | IQDR-NNFFLNKKKLEGAILWIPAFFLHSTSATVTRTLVDFFVEHKKQ---  |
| Stepar_9    | IQDR-NNFFLNKKKLEGAILWIPAFFLHSTSATVTRTLVDFFVEHKGQ---  |
| Molmol_9    | IQDR-NNFFLNKKKLEGAILWIPAFFLHSTSATVTRTLVDFFVEHKGQ---  |
| Hipcom_9    | IQDR-NNFFLHLKKKLEGAILWIPAFFLHSTSATVTRTLVDFFVEHKGQ--- |

|             |   |                                                      |
|-------------|---|------------------------------------------------------|
| Takrub_9    | B | IQDR-NNFFLNKKLGGAILWIPAFFLHTSATVTRTLVDFFVEHKGQ----   |
| Takrub_9    |   | IQDR-NNFFLNKKLGGAILWIPAFFLHTSATVTRTLVDFFVEHKGQ----   |
| Cynsem_9    |   | IQDR-NNFFLNKKLEGAILWIPAFFLHTSATVTRTLVDFFVEHKSQ----   |
| Scomax_9    |   | IQDR-NNFFLSLKKLEAILWIPAFFLHTSATVTRTLVDFFVEHKGQ----   |
| Corlav_9    |   | IQDR-NNFFLNKKLEGAILWIPAFFLHTSATVTRTLVDFFVEHKGQ----   |
| Oncmyk_9    |   | IQDR-NNFFLNKKLEGAILWIPAFFLHTSATVTRTLVDFFVEHKGQ----   |
| Salsal_9    |   | IQDR-NNFFLNKKLEGAILWIPAFFLHTSATVTRTLVDFFVEHKGQ----   |
| Onctsh_9    |   | IQDR-NNFFLNKKLEGAILWIPAFFLHTSATVTRTLVDFFVEHKGQ----   |
| Salalp_9    |   | IQDR-NNFFLNKKLEGAILWIPAFFLHTSATVTRTLVDFFVEHKGQ----   |
| Ampoce_9    |   | IQDR-NNFFLNKKLEGAILWIPAFFLHTSATVTRTLVDFFVEHKGQ----   |
| Amppe9      |   | IQDR-NNFFLNKKLEGAILWIPAFFLHTSATVTRTLVDFFVEHKGQ----   |
| Labber_9    |   | IQDR-NNFFLNKKLEGAILWIPAFFLHTSATVTRTLVDFFVEHKGQ----   |
| Umbpyg_3B   |   | IQDR-NNFFLSLKKLDGAILWI-AFFFFHTSATVTRTLVDFFVEHRGQ---- |
| Esoluc_3b   |   | IQDR-NNFFLSLKKLDGAILWIPAFFHTSATVTRTLVDFFVEHRGQ----   |
| Gadmor_9    |   | IQDR-NNFFLNKKLEGAILWIPAFFLHTSATVTRTLVDFFVEHKGQ----   |
| Umbpyg_9    |   | IQDR-NNFFLNKKLEGAILWIPAFFLHTSATVTRTLVDFFVEHKGQ----   |
| Esoluc_9    |   | IQDR-NNFFLNKKLEGAILWIPAFFLHTSATVTRTLVDFFVEHKGQ----   |
| Permag_9    |   | IQDR-NNFFLNKKLEGAILWIPAFFLHTSATVTRTLVDFFVEHKGQ----   |
| Bolpec_9    |   | IQDR-NNFFLNKKLEGAILWIPAFFLHTSATVTRTLVDFFVEHKGQ----   |
| Poefor9     |   | IQDR-NNFFLNKKLEGAILWIPAFFLHTSATVTRTLVDFFVEHKGQ----   |
| Masarm_9    |   | IQDR-NNFFLSLKKLEGAILWIPAFFLHTSATVTRTLVDFFVEHKGQ----  |
| Angjap_9    |   | IQDR-NNFFLSLKKLDGVVLWIPAFFHTSATVTRTLVDFFVEHRGQ----   |
| Poelat_9    |   | IQDR-NNFFLNKKLEGAILWIPAFFLHTSATVTRTLVDFFVEHKGQ----   |
| Poeret_9    |   | IQDR-NNFFLNKKLEGAILWIPAFFLHTSATVTRTLVDFFVEHKGQ----   |
| Xipmac_9    |   | IQDR-NNFFLNKKLEGAILWIPAFFLHTSATVTRTLVDFFVEHKGQ----   |
| Hapbur_9    |   | IQDR-NNFFLNKKLEGAILWIPAFFLHTSATVTRTLVDFFVEHKGQ----   |
| Orylat_9    |   | IQDR-NNFFLHLKKLEGAILWIPAFFLHTSATVTRTLVDFFVEHKGQ----  |
| Gamaff_9    |   | IQDR-NNFFLNKKLEGAILWIPAFFLHTSATVTRTLVDFFVEHKGQ----   |
| Neobri_9    |   | IQDR-NNFFLNKKLEGAILWIPAFFLHTSATVTRTLVDFFVEHKGQ----   |
| Funhet_9    |   | IQDR-NNFFLNKKLEGAILWIPAFFLHTSATVTRTLVDFFVEHKGQ----   |
| Punnye_9    |   | IQDR-NNFFLNKKLEGAILWIPAFFLHTSATVTRTLVDFFVEHKGQ----   |
| Cypvar_9    |   | IQDR-NNFFLNKKLEGAILWIPAFFLHTSATVTRTLVDFFVEHKGQ----   |
| Krymar_9    |   | IQDR-NNFFLNKKLEGAILWIPAFFLHTSATVTRTLVDFFVEHKGQ----   |
| Notfur_9    |   | IQDR-NNFFLNKKLEGAILWIPAFFLHTSATVTRTLVDFFVEHKGQ----   |
| Notpie_9    |   | IQDR-NNFFLNKKLEGAILWIPAFFLHTSATVTRTLVDFFVEHKGQ----   |
| Orenil_9    |   | IQDR-NNFFLNKKLEGAILWIPAFFLHTSATVTRTLVDFFVEHKGQ----   |
| Auslim_9    |   | IQDR-NNFFLNKKLEGAILWIPAFFLHTSATVTRTLVDFFVEHKGQ----   |
| Anates_9    |   | IQDR-NNFFLNKKLEGAILWIPAFFLHTSATVTRTLVDFFVEHKGQ----   |
| Astcal_9    |   | IQDR-NNFFLNKKLEGAILWIPAFFLHTSATVTRTLVDFFVEHKGQ----   |
| Mayzeb_9    |   | IQDR-NNFFLNKKLEGAILWIPAFFLHTSATVTRTLVDFFVEHKGQ----   |
| Orymel_9    |   | IQDR-NNFFLHLKKLEGAILWIPAFFLHTSATVTRTLVDFFVEHKGQ----  |
| Ampcit9     |   | IQDR-NNFFLNKKLEGAILWIPAFFLHTSATVTRTLVDFFVEHKGQ----   |
| Macfas_2    |   | ATWR-EKLLQRLHSLNGSILWIPAFMARGGKERVEWVNELILKHH-----   |
| Macmul_2    |   | ATWR-EKLLQRLHSLNGSILWIPAFMARGGKERVEWVNELILKHH-----   |
| Macnem_2    |   | ATWR-EKLLQRLHSLNGSILWIPAFMARGGKERVEWVNELILKHH-----   |
| Musmus_2    |   | ATWR-EKLLQRLHSLNGSILWIPAFMARGGKERVEWVNALILKHH-----   |
| Ponabe_2    |   | ATWR-EKLLQRLHSLNGSILWIPAFMARGGKERVEWVNELILKHH-----   |
| Papanu_2    |   | ATWR-EKLLQRLHSLNGSILWIPAFMARGGKERVEWVNELILKHH-----   |
| Nomleu_2    |   | ATWR-EKLLQRLHSLNGSILWIPAFMARGGKERVEWVNELILKHH-----   |
| Pantro_2    |   | ATWR-EKLLQRLHSLNGSILWIPAFMARGGKERVEWVNELILKHH-----   |
| Latcha_2    |   | ETWK-EKFLQRLQSLNGSIFWIPAFMAKGGEERVEWVNLI IKSG-----   |
| Gnapet2     |   | QQWR-DHFLQRLRSIAGGVLWIPAFMAKGGEERVELAARLILRHG-----   |
| Panbuc_2b   |   | ESWQ-ERFLQRLDQLGSSVLWIPAFMAKGGEERVEWALDLIRQHA-----   |
| Ostbic_2    |   | KQWK-GRFLQRLQGLNGSVLWIPAFMAKGGEERVAWAVRLILQHA-----   |
| Sinrhi2     |   | EEWV-QRFVHRLQSLSGSVLWIPAFMAKGGEERVEWAIIRLILLHT-----  |
| Hetzeb_2    |   | ETWK-EKLLHRLKMLDGGILWIPAFMAKGGEERVEWVNLI IKHK-----   |
| Hipcom_2    |   | DEWR-RRFARRLASLSGSVLWIPAFMAKGGEERVEWALRLILRHA-----   |
| Prigla_2    |   | ETWK-EKLLHRLKMLDDGILWIPAFMAKGGEERVEWVNLI IEHK-----   |
| Scytor_2    |   | DTWK-EKLLHRLKMLDGGILWIPAFMAKGGEERVEWVNRI IEHK-----   |
| Tetcal_2    |   | ETWK-EKLLHRLTMLDGAILWIPAFMAKGGEERVEWVNLI IEHK-----   |
| Rhityp_2    |   | ETWK-EKLLHRLKMLDGGILWIPAFMAKGGEERVEWVNLI IKHK-----   |
| Parkin_2b   |   | ARWR-EHFLQRLRGLGDAVLWIPAFMAKGGERVELALDVIRRQR-----    |
| Angang_2    |   | EAWR-ERFVRRRLALEGSVLWIPAFMAKGGEDRVEWATRLILRHA-----   |
| Pygnat_2    |   | EEWR-QRFVQRLQALSGSVLWIPAFMAKGGEERVEWAVRLILSHT-----   |
| Parkin_2    |   | QLWR-DHFLQRLRSIAGGVLWIPAFMAKGGEERVELAARLILRHS-----   |
| Gorgor_2    |   | ATWR-EKLLQRLHSLNGSILWIPAFMARGGKERVEWVNELILKHH-----   |
| Thegel_2    |   | ATWR-EKLLQRLHSLNGSILWIPAFMARGGKERVEWVNELILKHH-----   |
| Tupchi_2    |   | ATWR-EKLLQRLHSLNGSILWIPAFMARGGKERVEWVNELILKHR-----   |
| Galgai_2    |   | ETWR-EKLLQRLHSLNGSILWIPAFMAKGGERVEWVNELILKHR-----    |
| Eleele_2    |   | EEWR-QQFVQRLRELGSSVLWIPAFMAKGGEERVEAIRLILSHT-----    |
| Danrer_2    |   | EEWV-QRFVQRLQSLSGSVLWIPAFMAKGGEERVEWAIIRLILLHT-----  |
| Canlupfam_2 |   | ATWR-EKLLQRLSLNGSILWIPAFMARGGKERVEWVNELILKHH-----    |
| Aloalo_2    |   | EEWR-QRFIRRLQDLSGSVLWIPAFMAKGGEERVEWAIIRLILTHT-----  |
| Astmex_2    |   | KEWR-QRFVRRQLALSGSVLWIPAFMAKSGEDRVEWAVHLILSHT-----   |
| Sinans_2    |   | EEWV-QRFVHRLQSLSGSVLWIPAFMAKGGEERVEWAIIRLILLHT-----  |
| Scifor_2    |   | EQWK-GRFLRRQLGNGSVLWIPAFMAKGGEERVAWAVRLILQHA-----    |
| Ceraty_2    |   | ATWR-EKLLQRLHSLNGSILWIPAFMARGGKERVEWVNELILKHH-----   |

|             |                                                      |
|-------------|------------------------------------------------------|
| Anocar_2    | DTWR-EKLLQRLHSLNGSILWIPAFMAKGKKERVEVWVNELILKNH-----  |
| Anates_2    | EEWR-ARFLRRLQSLSGSVLWIPAFMAKGGEERVEWALRLILLHT-----   |
| Ampbic_2    | EEWT-ERFLQRLRSLSGSVLWIPAFMAKGGEERVEWALRLILLHT-----   |
| Sarpil_2    | EEWR-QRFIRRLQDLSGSVLWIPAFMAKGGEERVEWAIRLILTHT-----   |
| Xenlae_2    | DTWK-DKFLQRLKSLNESILWIPAFMAKGGEERVEWVNDLIKHH-----    |
| Cluhar_2    | EEWR-QRFVRRQLDLSGSVLWIPAFMAKGGEERVEWAIRLIIMHT-----   |
| Cypcar_2    | EEWV-QRFVHRLQSLSGSVLWIPAFMAKGGEERVEWAIRLILLHT-----   |
| Denclu_2    | EEWR-ERFVQRLRALSGSVLWIPAFMAKGGEERVEWAIRLILLHT-----   |
| Notpie_2    | EEWK-ERFLQRLRNLSGSVLWIPAFMAKRGEDRVEWVLRILLHT-----    |
| Erpcal2     | DTWK-DRLLQRLQNLNGSILWIPAFMAKGGEQRVELVNSLILKHQ-----   |
| Amical_2    | ESWR-ERFLQRLQSLNGSVLWIPAFMAKGGEERVEWANDLILKHH-----   |
| Lepocu_2    | SHWR-ERFLERLSSLNGSVLWIPAFMAKGGEERVQWASELILRHG-----   |
| Homsap_2    | ATWR-EKLLQRLHSLNGSILWIPAFMARGGKERVEVWVNELILKHH-----  |
| Bostau_2    | ATWR-EKLLQRLHSLNGSILWIPAFMARGGKQERVEVWVNELILKHH----- |
| Caraur_2    | EEWV-QRFVHRLQSLSGSVLWIPAFMAKGGEERVEWAIRLILLHT-----   |
| Thythy_2B   | EEWR-ERFLQRLRGLSGSVLWIPAFMAKGGEERVEWAIRLILLHT-----   |
| Onctsh_2B   | EEWR-ERFLQRLRSLSGSVLWIPAFMAKGGEERVEWAIRLILLHT-----   |
| Salsal_2B   | EEWR-ERFLQRLRGLSGSVLWIPAFMAKGGEERVEWAIRLILLHT-----   |
| Oncmvk_2B   | EEWR-ERFLQRLRSLSGSVLWIPAFMAKGGEERVEWAIRLILLHT-----   |
| Onckis_2B   | EEWR-ERFLQRLQSLSGSVLWIPAFMAKGGEERVEWAIRLILLHT-----   |
| Salsal_2A   | EQWR-ERFLQRLRGLSGSVLWIPAFMAKGGEERVEWAIRLILLHT-----   |
| Thythy_2A   | EQWR-ERFLQRLRGLSGSVLWIPAFMAKGGEERVEWAIRLILLHT-----   |
| Salalp_2A   | EQWR-ERFLQRLRGLSGSVLWIPAFMAKGGEERVEWAIRLILLHT-----   |
| Corlav_2A   | EQWR-ERFLQRLRGLSGSVLWIPAFMAKGGEERVEWAIRLILLHT-----   |
| Cormar_2A   | EQWR-ERFLQRLRGLSGSVLWIPAFMAKGGEERVEWAIRLILLHT-----   |
| Onctsh_2A   | EQWR-ERFLQRLRGLSGSVLWIPAFMAKGGEERVEWAIRLILLHT-----   |
| Oncmvk_2A   | EQWR-ERFLQRLRGLSGSVLWIPAFMAKGGEERVEWAIRLILLHT-----   |
| Neobri_2    | NEWK-ERFLRRLRSLSGSVLWIPAFMAKGGEERVEWALRLILLHT-----   |
| Takrub_2    | EEWR-ARFLRRLQSLSGSVLWIPAFMAKGGEERVEWTLRLILLHT-----   |
| Tetnig_2    | EEWR-DRFLRRLQSLSGSILWIPAFMAKGGEERVDWTLRLILLHT-----   |
| Orenil_2    | DEWK-ERFLRRLRSLSGSVLWIPAFMAKGGEERVEWALRLILLHT-----   |
| Orylat_2    | EEWK-QRFQRLQSLGGSVLWIPAFMAKGGEERVEWALRLILRHT-----    |
| Krymar_2    | EEWR-ERFLQRLRDLRGVWLWVPAFMAKGGEERVEWALRLILLHA-----   |
| Notfur_2    | EEWK-ERFLQRLRNLSGSVLWIPAFMAKRGEDRVEWVLRILLHT-----    |
| Poelat_2    | DEWK-DRFLQRLQNLSGSVLWIPAFMAKGGEERVEWALRLILVHT-----   |
| Gadmor_2    | PEWR-ARFVARLQSLRGSVLWIPAFMAKGGEERVEWAARLILLHT-----   |
| Xipmac_2    | DEWK-DRFLQRLQNLSGSVLWIPAFMAKGGEERVEWALRLILVHT-----   |
| Poeret_2    | DEWK-DRFLRRLQNLSGSVLWIPAFMAKGGEERVEWALRLILVHT-----   |
| Astcal_2    | NEWK-ERFLRRLRSLSGSVLWIPAFMAKGGEERVEWALRLILLHT-----   |
| Hapbur_2    | NEWK-ERFLRRLRSLSGSVLWIPAFMAKGGEERVEWALRLILLHT-----   |
| Acapol_2B   | EEWT-ERFLQRLRSLSGSVLWIPAFMAKGGEERVEWALRLILLHT-----   |
| Ampoce_2A   | EEWT-ERFLQRLRSLSGSVLWIPAFMAKGGEERVEWALRLILLHT-----   |
| Acapol_2A   | EEWT-ERFLQRLRSLSGSVLWIPAFMAKGGEERVEWALRLILLHT-----   |
| Mayzeb_2    | NEWK-ERFLRRLRSLSGSVLWIPAFMAKGGEERVEWALRLILLHT-----   |
| Punnye_2    | NEWK-ERFLRRLRSLSGSVLWIPAFMAKGGEERVEWALRLILLHT-----   |
| Latcal_2    | EEWR-DRFLQRLRSLSGSVLWIPAFMAKGGEERVEWALRLILLHT-----   |
| Singra_2    | EEWV-QRFVHRLQSLSGSVLWIPAFMAKGGEERVEWAIRLILLHT-----   |
| Auslim_2    | EEWK-ERFLRRLRDLGGSVLWIPAFMAKGGEERVEWALRLILLHA-----   |
| Monalb2     | DEWR-ERFLQRLQSLSGSVLWIPAFMAKGGEERVEWALRLILLHT-----   |
| Ampoce_2B   | EEWT-ERFLQRLRSLSGSVLWIPAFMAKGGEERVEWALRLILLHT-----   |
| Chiham_2    | EEWR-DRFLQRLQSLSGSVLWIPAFMAKGGEERVEWALRLILSHT-----   |
| Gasacu_2    | DEWR-DRFLQRLQSLSGSVLWIPAFMAKGGEERVEWALRLILSHT-----   |
| Gymacu_2    | EEWR-DRFLQRLQSLSGSVLWIPAFMAKGGEERVEWALRLILSHT-----   |
| Labber_2    | EEWR-DRFLQRLQSLSGSVLWIPAFMAKGGEERVEWALRLILLHT-----   |
| Cypvar_2    | EEWK-DRFLQRLRDLSGSVLWIPAFMAKGGEERVEWALRLILVHT-----   |
| Funhet_2    | DEWK-ERFLQRLRNLSGSVLWIPAFMAKGGEERVEWALRLIRVHT-----   |
| Larcro_2    | EEWR-DRFLKRLQSLSGSVLWIPAFMAKGGEERVEWALRLILLHT-----   |
| Paroli_2    | DEWR-DRFLQRLQSLSGSVLWIPAFMAKGGEERVEWALRLILLHT-----   |
| Perflu_2    | EEWR-DRFLQRLQSLSGSVLWIPAFMAKGGEERVEWALRLILLHT-----   |
| Serdum_2    | EEWR-DRFLQRLQSLSGSVLWIPAFMAKGGEERVEWALRLILLHT-----   |
| Stepar_2    | EEWK-ERFLQRLRSLSGSVLWIPAFMAKGGEERVEWALRLILLHT-----   |
| Notcor_2    | EEWR-DRFLQRLQSLSGSVLWIPAFMAKGGEERVEWALRLILSHT-----   |
| Treber_2    | EEWR-DRFLQRLQSLSGSVLWIPAFMAKGGEERVEWALRLILSHT-----   |
| Serlaldor_2 | EEWR-DRFLQRLQSLSGSVLWIPAFMAKGGEERVEWALRLILLHT-----   |
| Plaste_2    | DEWR-NRFLQRLQSLSGSVLWIPAFMAKGGEERVEWALRLILLHT-----   |
| Clabat_4    | ETTR-ERFVQRLRLLNDSVLWIPAFMVKGGKEKHVEGVNELILKKK-----  |
| Ictpun_4A   | ETVR-ENFVQRLRLLNDSVLWIPAFMVKGGKEKHVEGVNELILKKK-----  |
| Panhyp_4    | ATDT-ELFVQRLSLLNDSVLWIPAFMVKGGKEKHVEGVNELILKKK-----  |
| Umbpyg_4    | ATDT-ERFVQRLRMLKDSVLWIPAFMVKGGQHVVERVNELIVKRR-----   |
| Esoluc_4    | ASDM-ERFVQRLRMLNDSVLWIPAFMVKGGERHVESVNELIVKRR-----   |
| Plealt_4    | VSDA-ERFVRRRLRMLNDSVLWIPAFMVKGGKEKHVECVNELIVKRR----- |
| Onckis_4B   | ATDT-ERFVQRLRGLNDSVLWIPAFMVKGGERHVESVNELIVKRR-----   |
| Onckis_4A   | ATDT-ERFVQRLRGLNDSVLWIPAFMVKGGERHVESVNELIVKRR-----   |
| Onctsh_4    | ATDT-ERFVQRLRGLNDSVLWIPAFMVKGGERHVESVNELIVKRR-----   |
| Oncmvk_4    | ATDT-ERFVQRLRGLNDSVLWIPAFMVKGGERHVESVNELIVKRR-----   |
| Corlav_4    | ATDT-ERFVQRLRMLNDSVLWIPAFMVKGGERHVESVNELIVKRR-----   |
| Astmex_4A   | ETQR-ERFVERLSMLNDSVLWIPAFMVKGGKEKHVEGVNELILKKK-----  |

|              |                                                      |
|--------------|------------------------------------------------------|
| Pygnat_4     | ETVR-EHFVERLGMNDNSVLWIPAFMVKGGEKHVEGVNELILKRK-----   |
| Aloalo_4     | ATDR-ERFVERLRALNDNSVLWIPAFMVKGGEKHVEGVNELILQRS-----  |
| Cluhar_4     | ATDR-ERFVERLQALNDNSVLWIPAFMVKGGEKHVEGVNELILQRG-----  |
| Denclu_4     | ESDR-EKFVHRLIALNDNSVLWIPAFMVKGGEKHVEVVNNFILKQG-----  |
| Konpun4      | STDR-ERFVERLRALNDNSVLWIPAFMVKGGEKHVEGVNELILQRG-----  |
| Sarpil_4     | ATDR-ERFVERLRALNDNSVLWIPAFMVKGGEKHVEGVNELILQRG-----  |
| Caraur_4     | ERQQ-ERFIRRLQQLNNSVLWIPAFMVKGGERHVEIVNQLILKHK-----   |
| Cteide_4     | ETEQ-ENFILRLQQLNNSVLWIPAFMVKGGERHVEIVNELILKHK-----   |
| Petmar_4     | KADH-DRFGRRLRALNNSILWIPAFMAKGGEQHVEIVNNLLTLG-----    |
| Cypcar_4     | ERQR-ERFIQRLQQLNNSVLWIPAFMVKGGERHVEIVNELILKHK-----   |
| Danrer_4     | ETQQ-ENLIQRLQQLNNSVLWIPAFMVKGGMKHVDVTNELILKHK-----   |
| Misang_4     | KTAQ-EHFIQRLQQLNNSVLWIPAFMVKGSEKHVEGVNELILKNK-----   |
| Angjap_4     | DSDR-ERFVRRLGALNDNSVLWIPAFMVKGGERHVECVNDLILRHR-----  |
| Cypcar_4A    | ERQR-ERFIQRLQQLNNSVLWIPAFMVKGGERHVEIVNELILKHK-----   |
| Angang_4     | DSDR-ERFVRRLGALNDNSVLWIPAFMVKGGERHVECVNDLILRHR-----  |
| Cypcar_4B    | ERQR-ERFIRRLQQLNNSVLWIPAFMVKGGERHVEIVNQLILKHK-----   |
| Sinans_4A    | ERQR-ESFILRLQQLNNSVLWIPAFMVKGGERHVEIVNELILKHK-----   |
| Sinans_4B    | ERQR-VQFIRRLQQLNNSVLWIPAFMVKGGERHVEIVNQLILKHR-----   |
| Singra_4A    | ERQQ-ESFIRRLQQLNNSVFWIPAFMVKGGERHVETVNELILKHK-----   |
| Aptalb_4     | ETVR-EGFLRRLAALNDNSVLWIPAFMVKGGEKHVEGVNELILRRK-----  |
| Eigvir_4     | ETAR-ESFLRRLAALNDNSILWIPAFMVKGGEKHVEGVNELILRRK-----  |
| Eleele_4     | ETAR-DCFLLRLAVLNDNSVLWIPAFMVKGGEKHVEGVNELILQRK-----  |
| Parhas_4     | VTVR-EGFLRRLAALNDNSVLWIPAFMVKGGEKHVEGVNELILRRK-----  |
| ScIfor_4     | ESDR-VRFVQRLTMLNESVLWIPAFMVKGGEQHVERVNELILKNK-----   |
| Gnapet4      | ESDR-ERFVQRLIMLNDNSILWIPAFMVKGGEKHVEGVNELILNRK-----  |
| Ostbic_4     | ESDR-EKFVQRLIMLNDNSILWIPAFMVKGGEQHVEHVSELILKNR-----  |
| Parkin_4     | ESDR-ERFVQRLIMLNDNSILWIPAFMVKGGEKHVEGVNELILNRK-----  |
| Panbuc_4     | ATDR-QRFVQRLVALNDNSVLWIPAFMVKGGEKHVESVNELILKNG-----  |
| Erpcal4      | ETDR-EKFVQRLAMLNDNSVLWIPAFMVKGGEKHVEWVNELILKNK-----  |
| Salsal_4     | ATDT-ERFVQRLRGLNDNSVLWIPAFMVKGGERHVESVNELIVKRK-----  |
| Saltru_4     | ATDT-ERFVQRLRGLNDNSVLWIPAFMVKGGERHVESVNELIVKRK-----  |
| Salalp_4     | ATDT-ERFVERLRGLNDNSVLWIPAFMVKGGERHVESVNELIVKRK-----  |
| Salfon_4     | ATDT-ERFVERLRGLNDNSVLWIPAFMVKGGERHVESVNELIVKRK-----  |
| Thythy_4     | ATDT-ERFVHRLQVLNDNSVLWIPAFMVKGGERHVESVNELIVKRK-----  |
| Calmil_4     | ETDR-ENFVRRLAVLNDNSVLWIPAFMVKGGERHVEWVNELILKNK-----  |
| Hetzeb_4     | ETDR-EKFVDRRLAVLNDNSVLWIPAFMVKGGEKHVEYVNELILKNR----- |
| Rhityp_4     | ETDR-EKFVDRRLTVLNDNSVLWIPAFMVKGGEKYVEYVNELILKNR----- |
| Scytor_4     | ETDR-EKFVDRRLAVLNDNSVLWIPAFMVKGGEKHVEYVNELILKNR----- |
| Squaca_4     | ETDR-EKFVDRRLAVLNDNSVLWIPAFMVKGGEKHVEYVNELILKNR----- |
| Amical_4     | ETDR-EKFVRRLTMLNDNSVLWIPAFMVKGGEKHVECVNELILKNK-----  |
| Lepocu_4     | ETDR-ERFVQRLTLLNDNSVLWIPAFMVKGGEKHVECVNELILKNK-----  |
| Agema_4      | ETVR-ERFVQRLSLNDNSVLWIPAFMVKGGEKHVEGVNELILKRK-----   |
| Anocar_4     | ESDR-EKFVHRLSMLNDNSVLWIPAFMVKGGEKHVEWVNALILKNK-----  |
| Canlupfam_4  | ESDR-EKFVHRLSMLNDNSVLWIPAFMVKGGEKHVEWVNALILKNK-----  |
| Crigri_4     | ESDR-AKFVHRLSMLNDNSVLWIPAFMVKGGEKHVEWVNALILKNK-----  |
| Galgai_4     | ESDR-EKFVHRLSMLNDNSVLWIPAFMVKGGEKHLEWVNALILKNK-----  |
| Mesaur_4     | ESDR-EKFVHRLSMLNDNSVLWIPAFMVKGGEKHVEWVNALILKNK-----  |
| Homsap_4     | ESDR-EKFVHRLSMLNDNSVLWIPAFMVKGGEKHVEWVNALILKNK-----  |
| Notscuscu_4  | ESDR-EKFVHRLSMLNDNSVLWIPAFMVKGGEKHVQWVNALILKNK-----  |
| Psetextex_4  | ESDR-EKFVHRLSMLNDNSVLWIPAFMVKGGEKHVQWVNALILKNK-----  |
| Musmus_4     | ESDR-EKFVHRLSMLNDNSVLWIPAFMVKGGEKHVEWVNALILKNK-----  |
| Pogvit_4     | ESDR-EKFVHRLSMLNDNSVLWIPAFMVKGGEKHVEWVNALILKNK-----  |
| Promuc_4     | ESDR-EKFVHRLSMLNDNSVLWIPAFMVKGGEKHVEWVNALILKNK-----  |
| Pantro_4     | ESDR-EKFVHRLSMLNDNSVLWIPAFMVKGGEKHVEWVNALILKNK-----  |
| Pytbiv_4     | ESDR-EKFVHRLSMLNDNSVLWIPAFMVKGGEKHVEWVNALILKNK-----  |
| Ratnor_2     | ATWR-EKLLQRLHGLNGSILWIPAFMARGGKERVVEWVNALILKHH-----  |
| Ratnor_4     | ESDR-EKFVHRLSMLNDNSVLWIPAFMVKGGEKHVEWVNALILKNK-----  |
| Siltro_2     | DTWK-DKFLQRLKSLNESILWIPAFMAKGGEERVEWVNDLIIKHH-----   |
| Siltro_4     | ESDR-EKFVHRLSMLNDNSVLWIPAFMVKGGEKHVEWVNALILKNQ-----  |
| Susscr_4     | ESDR-EKFVHRLSMLNDNSVLWIPAFMVKGGEKHVEWVNALILKNK-----  |
| Taegut_4     | ESDR-EKFVHRLSMLNDNSVLWIPAFMVKGGEKHVEWVNALILKNK-----  |
| Termextri_4M | ESDR-EKFVHRLSMLNDNSVLWIPAFMVKGGEKHVEWVNALILKNK-----  |
| Thasirsir_4  | ESDR-EKFVHRLSMLNDNSVLWIPAFMVKGGEKHVEWVNALILKNK-----  |
| Xenlae_4B    | ESDR-EKFVHRLSMLNDNSVLWIPAFMVKGGEKHVEWVNALILKNQ-----  |
| Xenlae_4A    | ESDR-EKFVHRLSMLNDNSVLWIPAFMVKGGEKHVEWVNALILKNQ-----  |
|              | 151                                                  |
| Latcal_3     | LKVQLAWPGN-IMQYINNYWKTQQLSPKRLSTGILMYT----LASSMCDQ   |
| Perflu_3     | LKVQLAWPGN-IMQYVNSYWKTQQLSPKRLSTGILMYT----LASSMCDQ   |
| Serdum_3     | LKVQLAWPGN-IMQYINNYWKTQQLSPKRLSTGILMYT----LASSMCDQ   |
| Stepar_3     | LKVQLAWPGN-IMQYINNYWKTQQLSPKRLSTGILMYT----LASSMCDQ   |
| Tetcal_3     | LKVQLAWPGN-IMQHINKYWKTQQLSPKRLSTGILMYT----LASAICEE   |
| Monalb_3     | LKVQLAWPGN-IMQYINNYWKTQQLSPKRLSTGILMYT----LASSMCDQ   |
| Molmol_3     | LKVQLAWPGN-IMQYINNYWKTQQLSPKRLSTGILMYT----LASSMCDQ   |
| Takrub_3     | LKVRLAWPGN-IMQYINNYWKTQQLSPKRLSTGILMYT----LASSMCDQ   |
| Canlupfam_3  | LKVQLAWPGN-IMQHVNRYYWKNKHLSPKRLSTGILMYT----LASAICEE  |
| Bostau_3     | LKLQQLAWPGN-IMQHVNRYYWKNKHLSPKRLSTGILMYT----LASAVCEE |
| Homsap_3     | LKVQLAWPGN-IMQHVNRYYWKNKHLSPKRLSTGILMYT----LASAICEE  |

|             |                                                     |
|-------------|-----------------------------------------------------|
| Siltro_3    | LKVQLDWPNG-IMQHVNRWYKKNKHLSPKRLSTGILMYT----LASSVCEE |
| Anocar_3    | LKVQLAWPGN-IMQHVNRWYKKNKHLAPKRLSTGILMYT----LASAICDE |
| Musmus_3    | LKVQLAWPGN-IMQHVNRWYKKNKHLSPKRLSTGILMYT----LASAICDE |
| Pantro_3    | LKVQLAWPGN-IMQHVNRWYKKNKHLSPKRLSTGILMYT----LASAICEE |
| Ratnor_3    | LKVQLAWPGN-IMQHVNRWYKKNKHLSPKRLSTGILMYT----LASAICEE |
| Galgal_3    | LKVQLAWPGN-IMQHVNRWYKKNKHLSPKRLSTGILMYT----LASAICEE |
| Lepocu_3    | LKVQLAWPGN-IMQYVNRWYKTKHLAPKRLSTGILMYT----LASAMCEE  |
| Tetnig_3    | LKVQLAWPGN-IMQYINNYWKTQLSPKRLSTGILMYT----LASSMCE    |
| Squaca_3    | LKVQLAWPGN-IMQYVNSYWKTQLSPKRLSTGILMYT----LASSMCDQ   |
| Perfla_3    | LKVQLAWPGN-IMQYVNSYWKTQLSPKRLSTGILMYT----LASSMCDQ   |
| Salsal_3    | LKVQLAWPGN-IMQYVNRWYKTKQLSPKRLSTGILMYT----LASSMCEE  |
| Serlaldor_3 | LKVQLAWPGN-IMQYINNYWKTQLSPKRLSTGILMYT----LASSMCDQ   |
| Treber_3    | LKVELAWPGN-IMHVDNKYWKTKNLSPKRLSTGILMYT----LASAMCDE  |
| Cynsem_3    | LKVQLAWPGN-IMQYIN-----STGILMYT----LASSMCDQ          |
| Paroli_3    | LKVQLAWPGN-IMHVDNKYWKTKNLSPKRLSTGILMYT----LAYAMCDE  |
| Paroli_3b   | LKVQLAWPGN-IMQYINNYWKTQLSPKRLSTGILMYT----LASSMCDQ   |
| Plaste_3    | LKVQLAWPGN-IMHVDNKYWKTKNLSPKRLSTGILMYT----LAYAMCDE  |
| Plaste_3b   | LKVQLAWPGN-IMQYINSYWKTQLSPKRLSTGILMYT----LASSMCDQ   |
| Erpcal3     | LKVQLAWPGN-IMQYINRYWKTQLSPKRLSTGILMYT----LASAMCEE   |
| Calmil_3b   | LKVELAWPGN-IMQYVNRWYKTKQLSPKRLSTGILMYT----LASSVCEE  |
| Hetzeb_3    | LKVQLAWPGN-IMQYINRYWKTQLSPKRLSTGILMYT----LASAICEE   |
| Latcha_3    | LKVQLAWPGN-IMQYINRYWKTQLSPKRLSTGILMYT----LASAMCDE   |
| Anates_3    | LKVQLAWPGN-IMQYINRYWKTQLSPKRLSTGILMYT----LASSMCDQ   |
| Ampcit3     | LKVQLAWPGN-IMQYINRYWKTQLSPKRLSTGILMYT----LASSMCDQ   |
| Auslim_3    | LKVQLAWPGN-IMQYINRYWKTQLSPKRLSTGILMYT----LASSMCDQ   |
| Cypvar_3    | LKVQLAWPGN-IMQYINRYWKTQLSPKRLSTGILMYT----LASSMCDQ   |
| Krymar_3    | LKVQLAWPGN-IMQYINRYWKTQLSPKRLSTGILMYT----LASSMCDQ   |
| Funhet_3    | LKVQLAWPGN-IMQYINRYWKTQLSPKRLSTGILMYT----LASSMCDQ   |
| Gamaff3     | LKVQLAWPGN-IMQYINRYWKTQLSPKRLSTGILMYT----LASSMCDQ   |
| Orylat_3    | LKVQLAWPGN-IMQYINRYWKTQLSPKRLSTGILMYT----LASSMCDQ   |
| Orenil_3    | LKVQLAWPGN-IMQYINRYWKTQLSPKRLSTGILMYT----LASSMCDQ   |
| Mayzeb_3    | LKVQLAWPGN-IMQYINRYWKTQLSPKRLSTGILMYT----LASSMCDQ   |
| Punnye_3    | LKVQLAWPGN-IMQYINRYWKTQLSPKRLSTGILMYT----LASSMCDQ   |
| Punnye_3a   | LKVQLAWPGN-IMQYINRYWKTQLSPKRLSTGILMYT----LASSMCDQ   |
| Neobri_3    | LKVQLAWPGN-IMQYINRYWKTQLSPKRLSTGILMYT----LASSMCDQ   |
| Misang_3    | LKVQLAWPGN-IMQYINRYWKTQLSPKRLSTGILMYT----LASSMCDQ   |
| Sinrhi3     | LKVQLAWPGN-IMQYINRYWKTQLSPKRLSTGILMYT----LASSMCDQ   |
| Singra_3    | LKVQLAWPGN-IMQYINRYWKTQLSPKRLSTGILMYT----LASSMCDQ   |
| Hapbur_3    | LKVQLAWPGN-IMQYINRYWKTQLSPKRLSTGILMYT----LASSMCDQ   |
| Astcal_3    | LKVQLAWPGN-IMQYINRYWKTQLSPKRLSTGILMYT----LASSMCDQ   |
| Notfur_3    | LKVQLAWPGN-IMQYINRYWKTQLSPKRLSTGILMYT----LASSMCDQ   |
| Cypcar_3    | LKVQLAWPGN-IMQYINRYWKTQLSPKRLSTGILMYT----LASSMCDQ   |
| Poefor3     | LKVQLAWPGN-IMQYINRYWKTQLSPKRLSTGILMYT----LASSMCDQ   |
| Poelat_3    | LKVQLAWPGN-IMQYINRYWKTQLSPKRLSTGILMYT----LASSMCDQ   |
| Poeret_3    | LKVQLAWPGN-IMQYINRYWKTQLSPKRLSTGILMYT----LASSMCDQ   |
| Angang_3    | LKVQLAWPGN-IMQYINRYWKTQLSPKRLSTGILMYT----LASSMCDQ   |
| Xipmac_3    | LKVQLAWPGN-IMQYINRYWKTQLSPKRLSTGILMYT----LASSMCDQ   |
| Masarm_3    | LKVQLAWPGN-IMQYINRYWKTQLSPKRLSTGILMYT----LASSMCDQ   |
| Permag_3    | LKVQLAWPGN-IMQYINRYWKTQLSPKRLSTGILMYT----LASSMCDQ   |
| Gnapet3     | LKVQLAWPGN-IMQYINRYWKTQLSPKRLSTGILMYT----LASSMCDQ   |
| Ostbic_3    | LKVQLAWPGN-IMQYINRYWKTQLSPKRLSTGILMYT----LASSMCDQ   |
| Gadmor_3    | LKVQLAWPGN-IMQYINRYWKTQLSPKRLSTGILMYT----LASSMCDQ   |
| Scifor_3    | LKVQLAWPGN-IMQYINRYWKTQLSPKRLSTGILMYT----LASSMCDQ   |
| Acapol3     | LKVQLAWPGN-IMQYINRYWKTQLSPKRLSTGILMYT----LASSMCDQ   |
| Ampoce_3    | LKVQLAWPGN-IMQYINRYWKTQLSPKRLSTGILMYT----LASSMCDQ   |
| Scfor_3b    | LKVQLAWPGN-IMQYINRYWKTQLSPKRLSTGILMYT----LASSMCDQ   |
| Ostbic_3b   | LKVQLAWPGN-IMQYINRYWKTQLSPKRLSTGILMYT----LASSMCDQ   |
| Parkin_3    | LKVQLAWPGN-IMQYINRYWKTQLSPKRLSTGILMYT----LASSMCDQ   |
| Ampper3     | LKVQLAWPGN-IMQYINRYWKTQLSPKRLSTGILMYT----LASSMCDQ   |
| Oncmyk_3    | LKVQLAWPGN-IMQYINRYWKTQLSPKRLSTGILMYT----LASSMCDQ   |
| Gasacu_3    | LKVQLAWPGN-IMQYINRYWKTQLSPKRLSTGILMYT----LASSMCDQ   |
| Labber_3    | LKVQLAWPGN-IMQYINRYWKTQLSPKRLSTGILMYT----LASSMCDQ   |
| Panbuc_3    | LKVQLAWPGN-IMQYINRYWKTQLSPKRLSTGILMYT----LASSMCDQ   |
| Parhas3     | LKVQLAWPGN-IMQYINRYWKTQLSPKRLSTGILMYT----LASSMCDQ   |
| Cluhar_3    | LKVQLAWPGN-IMQYINRYWKTQLSPKRLSTGILMYT----LASSMCDQ   |
| Aloalo_3    | LKVQLAWPGN-IMQYINRYWKTQLSPKRLSTGILMYT----LASSMCDQ   |
| Panhyp_3    | LKVQLAWPGN-IMQYINRYWKTQLSPKRLSTGILMYT----LASSMCDQ   |
| Eleele_3    | LKVQLAWPGN-IMQYINRYWKTQLSPKRLSTGILMYT----LASSMCDQ   |
| Denclu_3    | LKVQLAWPGN-IMQYINRYWKTQLSPKRLSTGILMYT----LASSMCDQ   |
| Sarpil_3    | LKVQLAWPGN-IMQYINRYWKTQLSPKRLSTGILMYT----LASSMCDQ   |
| Eigvir_3    | LKVQLAWPGN-IMQYINRYWKTQLSPKRLSTGILMYT----LASSMCDQ   |
| Aptalb_3    | LKVQLAWPGN-IMQYINRYWKTQLSPKRLSTGILMYT----LASSMCDQ   |
| Sinans_3    | LKVQLAWPGN-IMQYINRYWKTQLSPKRLSTGILMYT----LASSMCDQ   |
| Pygnat_3    | LKVQLAWPGN-IMQYINRYWKTQLSPKRLSTGILMYT----LASSMCDQ   |
| Astmex_3    | LKVQLAWPGN-IMQYINRYWKTQLSPKRLSTGILMYT----LASSMCDQ   |
| Caraur_3    | LKVQLAWPGN-IMQYINRYWKTQLSPKRLSTGILMYT----LASSMCDQ   |
| Danrer_3    | LKVQLAWPGN-IMQYINRYWKTQLSPKRLSTGILMYT----LASSMCDQ   |

|             |                                                     |
|-------------|-----------------------------------------------------|
| Ictpun_3    | LRVQLAWPGN-IMQYVNRKYWKTQKLSPKRLSTGILMFT----LASSLCDQ |
| Plealt_3    | LKVQLAWPGN-IMQYVNRKYWKTQKLSPKRLSTGILMYT----LASSMCDE |
| Plealt_9    | LKIELAWPGN-IMQDVNKYWKTKNLSPKRLSTGILMYT----LASAMCEE  |
| Gasacu_9    | LKVELAWPGN-IMHVDNKYWKTKNLSPKRLSTGILMYT----LASAMCDE  |
| Parkin_9    | LNQQLAFPGN-IMHYINSYWKTKQKLSPKRLSTGILMYT----LASAMCEE |
| Acapol_9    | LKVELAWPGN-IMHVDNKYWKTKNLSPKRLSTGILMYT----LASAMCDE  |
| Larcro_9    | LKVELAWPGN-IMHVDNKYWKTKNLSPKRLSTGILMYT----LASAMCDE  |
| Notcor_9    | LKVELAWPGN-IMHVDNKYWKTKNLSPKRLSTGILMYT----LASAMCDE  |
| Latcal_9    | LKVELAWPGN-IMHVDNKYWKTKNLSPKRLSTGILMYT----LAYAMCDE  |
| Serlaldor_9 | LKVELAWPGN-IMHVDNKYWKTKNLSPKRLSTGILMYT----LAYAMCDE  |
| Monalb_9    | LKVDLAWPGN-IMHNINKYWKTKSLSPKRLSTGILMYT----LATAMCDE  |
| Serdum_9    | LKVELAWPGN-IMHVDNKYWKTKNLSPKRLSTGILMYT----LAYAMCDE  |
| Perflu_9    | LKIELAWPGN-IMHVDNKYWKTKNLSPKRLSTGILMYT----LASAMCDE  |
| Perfla_9    | LKIELAWPGN-IMHVDNKYWKTKNLSPKRLSTGILMYT----LASAMCDE  |
| Stepar_9    | LKVELAWPGN-IMHVDNKYWKTKNLSPKRLSTGILMYT----LASAMCDE  |
| Molmol_9    | LKVELAWPGN-IMHVDNKYWKTKNLSPKRLSTGILMYT----LASAMCDE  |
| Hipcom_9    | LKVELAWPGN-IMHVDNKYWKTKNLSPKRLSTGILMYT----LASAMCDE  |
| Takrub_9 B  | LKVELAWPGN-IMHVDNKYWKTKNLSPKRLSTGILMYT----LASAMCDE  |
| Takrub_9    | LKVELAWPGN-IMHVDNKYWKTKNLSPKRVSTGILMYT----LASAMCDE  |
| Cynsem_9    | LKVKLAWPGN-IMHVDNKYWKTKNLSPKRLSTGILMYT----LAYAMCDE  |
| Scomax_9    | LKVKLAWPGN-IMHVDNKYWKTKNLSPKRLSTGILMYT----LAYAMCDE  |
| Corlav_9    | LKIELAWPGN-IMQDVNKYWKTKNLSPKRLSTGILMYT----LASAMCEE  |
| Oncmk_9     | LKVELAWPGN-IMQDVNKYWKTKNLSPKRLSTGILMYT----LASAMCEE  |
| Salsal_9    | LKIELAWPGN-IMQDVNKYWKTKNLSPKRLSTGILMYT----LASAMCEE  |
| Onctsh_9    | LKIELAWPGN-IMQDVNKYWKTKNLSPKRLSTGILMYT----LASAMCEE  |
| Salalp_9    | LKIELAWPGN-IMQDVNKYWKTKNLSPKRLSTGILMYT----LASAMCEE  |
| Ampoce_9    | LKVELAWPGN-IMHVDNKYWKTKNLSPKRLSTGILMYT----LASAMCDE  |
| Amppe9      | LKVELAWPGN-IMHVDNKYWKTKNLSPKRLSTGILMYT----LASAMCDE  |
| Labber_9    | LKVELAWPGN-IMHVDNKYWKTKNLSPKRLSTGILMYT----LASAMCDE  |
| Umbpyg_3B   | LKVKLAWPGN-IMHYVNRKYWKTQKLSPKRLSTGILMYT----LASAMCEE |
| Esoluc_3b   | LKVQLAWPGN-IMHYINSYWKTKQKLSPKRLSTGILMYT----LASAMCEE |
| Gadmor_9    | LKIELAWPGN-IMQDVNKYWKTKNLSPKRLSTGILMYT----LASAMCEE  |
| Umbpyg_9    | LKVELAWPGN-IMQDVNKYWKTKNLSPKRLSTGILMYT----LASAMCEE  |
| Esoluc_9    | LKVELAWPGN-IMQDVNKYWKTKNLSPKRLSTGILMYT----LASAMCEE  |
| Permag_9    | LKVELAWPGN-IMHVDNKYWKTKNLSPKRLSTGILMYT----LASAMCDE  |
| Bolpec_9    | LKVELAWPGN-IMHVDNKYWKTKNLSPKRLSTGILMYT----LASAMCDE  |
| Poefor9     | LKVELAWPGN-IMHVDNKYWKTKNLSPKRLSTGILMYT----LASAMCDE  |
| Masarm_9    | LKVELAWPGN-IMHVDNKYWKTKNLSPKRLSTGILMYT----LASAMCDE  |
| Angjap_9    | LKVQLAWPGN-IMQYVNRKYWKTQKLSPKRLSTGILMYT----LASAMCEE |
| Poelat_9    | LKVELAWPGN-IMHVDNKYWKTKNLSPKRLSTGILMYT----LASAMCDE  |
| Poeret_9    | LKVELAWPGN-IMHVDNKYWKTKNLSPKRLSTGILMYT----LASAMCDE  |
| Xipmac_9    | LKIELAWPGN-IMHVDNKYWKTKNLSPKRLSTGILMYT----LASAMCDE  |
| Hapbur_9    | LKIELAWPGN-IMHVDNKYWKTKNLSPKRLSTGILMYT----LASAICDE  |
| Orylat_9    | LKVELAWPGN-IMHVDNKYWKTKNLSPKRLSTGILMYT----LAFSMCDE  |
| Gamaff_9    | LKVELAWPGN-IMHVDNKYWKTKNLSPKRLSTGILMYT----LASAMCDE  |
| Neobri_9    | LKIELAWPGN-IMHVDNKYWKTKNLSPKRLSTGILMYT----LASAICDE  |
| Funhet_9    | LKVELAWPGN-IMHVDNKYWKTKNLSPKRLSTGILMYT----LAYAMCDE  |
| Punnye_9    | LKIELAWPGN-IMHVDNKYWKTKNLSPKRLSTGILMYT----LASAICDE  |
| Cypvar_9    | LKVELAWPGN-IMHVDNKYWKTKNLSPKRLSTGILMYT----LAYAMCDE  |
| Krymar_9    | LKVELAWPGN-IMHVDNKYWKTKNLSPKRLSTGILMYT----LASAMCDE  |
| Notfur_9    | LKVELAWPGN-IMHVDNKYWKTKNLSPKRLSTGILMYT----LASAMCDE  |
| Notpie_9    | LKVELAWPGN-IMHVDNKYWKTKNLSPKRLSTGILMYT----LASAMCDE  |
| Orenil_9    | LKIELAWPGN-IMHVDNKYWKTKNLSPKRLSTGILMYT----LASAICDE  |
| Auslim_9    | LKVELAWPGN-IMQDVNKYWKTKNLSPKRLSTGILMYT----LASAMCDE  |
| Anates_9    | LKVELAWPGN-IMHVDNKYWKTKNLSPKRLSTGILMYT----LAYAMCDE  |
| Astcal_9    | LKIELAWPGN-IMHVDNKYWKTKNLSPKRLSTGILMYT----LASAICDE  |
| Mayzeb_9    | LKIELAWPGN-IMHVDNKYWKTKNLSPKRLSTGILMYT----LASAICDE  |
| Orymel_9    | LKVELAWPGN-IMHVDNKYWKTKNLSPKRLSTGILMYT----LAFAMCDE  |
| Ampcit9     | LKIELAWPGN-IMHVDNKYWKTKNLSPKRLSTGILMYT----LASAICDE  |
| Macfas_2    | VNVRTAYPSLRLHAVRGYWLTKNVHIKRPTTGILMYT----LATRFCNQ   |
| Macmul_2    | VNVRTAYPSLRLHAVRGYWLTKNVHIKRPTTGILMYT----LATRFCNQ   |
| Macnem_2    | VNVRTAYPSLRLHAVRGYWLTKNVHIKRPTTGILMYT----LATRFCNQ   |
| Musmus_2    | VNVRTAYPSLRLHAVRGYWLTKNVHIKRPTTGILMYT----LATRFCNQ   |
| Ponabe_2    | VNVRTAYPSLRLHAVRGYWLTKNVHIKRPTTGILMYT----LATRFCNE   |
| Papanu_2    | VNVRTAYPSLRLHAVRGYWLTKNVHIKRPTTGILMYT----LATRFCNQ   |
| Nomleu_2    | VNVRTAYPSLRLHAVRGYWLTKNVHIKRPTTGILMYT----LATRFCNQ   |
| Pantro_2    | VNVRTAYPSLRLHAVRGYWLTKNVHIKRPTTGILMYT----LATRFCNQ   |
| Latcha_2    | INVQTAYPSLRLHAVRGYWLTKNVHIKRPTTGILMYT----LATRFCDE   |
| Gnapet2     | LNVRPAFPSLRLHAVRGYWLTKNVHIKRPTTGILMYT----MATRFCDE   |
| Panbuc_2b   | VHVRPAFPSLRLHAVRGYWLTKNVHIKRPTTGILMYT----LATRFCNQ   |
| Ostbic_2    | INVHTAFPSLRLHAVRGYWLTKNVHIKRPTTGILMYT----MATRFCEQ   |
| Sinrhi2     | VNVRTAFPSLRLHAVRGYWLTKNVHIKRPTTGILMYT----MATRFCDE   |
| Hetzeb_2    | IRVQTAYPSLRLHAVRGYWLTKNVHIKRPTTGILMYT----LATRFCDE   |
| Hipcom_2    | ADVRTAFPSLRLHAVRGYWLTKNVHIKRPTTGILMYT----MATRFCEE   |
| Prigla_2    | IHVQTAYPSLRLHAVRGYWLTKNVHIKRPTTGILMYT----LATRFCDE   |
| Scytor_2    | IHVQTAYPSLRLHAVRGYWLTKNVHIKRPTTGILMYT----LATRFCDE   |
| Tetcal_2    | IHVQTAYPSLRLHAVRGYWLTKNVHIKRPTTGILMYT----LATRFCDE   |



|             |                                                   |
|-------------|---------------------------------------------------|
| Rhityp_2    | LHVQTAYPSLRLHHAVRGYWLTKVLIKRPTTGLLMYT----LATRFCDE |
| Parkin_2b   | LAVRPAPPSLRLHDAVRGYWLTKVHIKRPTTGLLMYT----MATRFCEE |
| Angang_2    | LNVRTAFPSLRLHHAVRGYWLTKVLIKRPTTGLLMYT----MATRFCDE |
| Pygnat_2    | VNVHTAFPSLRLHHAVRGYWLTKVHIKRPTTGLLMYT----MATRFCDE |
| Parkin_2    | LDVRPAPPSLRLHDAVRGYWLTKVHIKRPTTGLLMYT----MATRFCDE |
| Gorgor_2    | VNVRTAYPSLRLHHAVRGYWLTKVHIKRPTTGLLMYT----LATRFCNQ |
| Thegel_2    | VNVRTAFPSLRLHHAVRGYWLTKVHIKRPTTGLLMYT----LATRFCNQ |
| Tupchi_2    | VNVRTAYPSLRLHHAVRGYWLTKVHIKRPTTGLLMYT----LATRFCNQ |
| Galgai_2    | INVRTAYPSLRLHHAVRGYWLTKVHIKRPTTGLLMYT----LATRFCNR |
| Eleele_2    | GNVHAAFPSLRLHHAVRGYWLTKVHIKRPTTGLLMYT----MATRFCDE |
| Danrer_2    | VNVRTAFPSLRLHHAVRGYWLTKVHIKRPTTGLLMYT----MATRFCDE |
| Canlupfam_2 | VNVRTAYPSLRLHHAVRGYWLTKVHIKRPTTGLLMYT----LATRFCNQ |
| Aloalo_2    | VNVRTAFPSLRLHHAVRGYWLTKVHIKRPTTGLLMYT----MATRFCDE |
| Astmex_2    | VSVHAAFPSLRLHHAVRGYWLTKVHIKRPTTGLLMYT----MATRFCEE |
| Sinans_2    | VNVRTAFPSLRLHHAVRGYWLTKVHIKRPTTGLLMYT----MATRFCDE |
| Scifor_2    | INVHTAFPSLRLHHAVRGYWLTKVHIKRPTTGLLMYT----MATRFCEE |
| Ceraty_2    | VNVRTAYPSLRLHHAVRGYWLTKVHIKRPTTGLLMYT----LATRFCNQ |
| Anocar_2    | INVRTAYPSLRLHHAVRGYWLTKVHIKRPTTGLLMYT----LATRFCNR |
| Anates_2    | VDVRTAFPSLRLHHAVRGYWLTKVHIKRPTTGLLMYT----MATRFCEE |
| Ampbic_2    | VDVRTAFPSLRLHHAVRGYWLTKVHIKRPTTGLLMYT----MATRFCEE |
| Sarpil_2    | VNVRTAFPSLRLHHAVRGYWLTKVHIKRPTTGLLMYT----MATRFCDE |
| Xenlae_2    | INVHTAYPSLRLHHAVRGYWLTKVHIKRPTTGILMYT----LATRFCNR |
| Cuuhar_2    | VNVRTAFPSLRLHHAVRGYWLTKVHIKRPTTGLLMYT----MATRFCDE |
| Cypcar_2    | VNVRTAFPSLRLHHAVRGYWLTKVHIKRPTTGLLMYT----MATRFCDE |
| Denclu_2    | VNVRTAFPSLRLHHAVRGYWLTKVHIKRPTTGLLMYT----MATRFCEE |
| Notpie_2    | VDVRMAFPSLRLHHAVRGYWLTKVHIKRPTTGLLMYT----MATRFCEE |
| Ercal2      | INVQTAFPSLRLHHAVRGYWLTKVHIKRPTTGLLMYT----LATRFCDE |
| Amical_2    | INVRTAFPSLRLHHAVRGYWLTKVHIKRPTTGMLMYT----LATRFCEE |
| Lepocu_2    | INVRTAFPSLRLHHAVRGYWLTKVHIKRPTTGLLMYT----LATRFCEE |
| Homsap_2    | VNVRTAYPSLRLHHAVRGYWLTKVHIKRPTTGLLMYT----LATRFCNQ |
| Bostau_2    | VNVRTAFPSLRLHHAVRGYWLTKVHIKRPTTGLLMYT----LATRFCNQ |
| Caraur_2    | VNVRTAFPSLRLHHAVRGYWLTKVHIKRPTTGLLMYT----MATRFCDE |
| Thythy_2B   | VDVHTAFPSLRLHHAVRGYWLTKVHIKRPTTGLLMYT----MATRFCEE |
| Onctsh_2B   | VDVHTAFPSLRLHHAVRGYWLTKVHIKRPTTGLLMYT----MATRFCEE |
| Salsal_2B   | VDVHTAFPSLRLHHAVRGYWLTKVHIKRPTTGLLMYT----MATRFCEE |
| Oncmyk_2B   | VDVHTAFPSLRLHHAVRGYWLTKVHIKRPTTGLLMYT----MATRFCEE |
| Onckis_2B   | VDVHTAFPSLRLHHAVRGYWLTKVHIKRPTTGLLMYT----MATRFCEE |
| Salsal_2A   | VDVHTAFPSLRLHHAVRGYWLTKVHIKRPTTGLLMYT----MATRFCEE |
| Thythy_2A   | VDVHTAFPSLRLHHAVRGYWLTKVHIKRPTTGLLMYT----MATRFCEE |
| Salalp_2A   | VDVHTAFPSLRLHHAVRGYWLTKVHIKRPTTGLLMYT----MATRFCEE |
| Corlav_2A   | VDVHTAFPSLRLHHAVRGYWLTKVHIKRPTTGLLMYT----MATRFCEE |
| Cormar_2A   | VDVHTAFPSLRLHHAVRGYWLTKVHIKRPTTGLLMYT----MATRFCEE |
| Onctsh_2A   | VDVHTAFPSLRLHHAVRGYWLTKVHIKRPTTGLLMYT----MATRFCEE |
| Oncmyk_2A   | VDVHTAFPSLRLHHAVRGYWLTKVHIKRPTTGLLMYT----MATRFCEE |
| Neobri_2    | VDVHTAFPSLRLHHAVRGYWLTKVHIKRPTTGLLMYT----MATRFCEE |
| Takrub_2    | VDVHTAFPSLRLHHAVRGYWLTKVHIKRPTTGLLMYT----MATRFCEE |
| Tetnig_2    | VDVHTAFPSLRLHHAVRGYWLTKVHIKRPTTGLLMYT----MATRFCEE |
| Orenil_2    | VDVHTAFPSLRLHHAVRGYWLTKVHIKRPTTGLLMYT----MATRFCEE |
| Orylat_2    | VDVHTAFPSLRLHHAVRGYWLTKVHIKRPTTGLLMYT----MATRFCEE |
| Krymar_2    | VDVHTAFPSLRLHHAVRGYWLTKVHIKRPTTGLLMYT----MATRFCEE |
| Notfur_2    | VDVHTAFPSLRLHHAVRGYWLTKVHIKRPTTGLLMYT----MATRFCEE |
| Poelat_2    | VDVHTAFPSLRLHHAVRGYWLTKVHIKRPTTGLLMYT----MATRFCEE |
| Gadmor_2    | VGIRTAFPSLRLHHAVRGYWLTKVHIKRPTTGLLMYT----MATRFCEE |
| Xipmac_2    | VDVHTAFPSLRLHHAVRGYWLTKVHIKRPTTGLLMYT----MATRFCEE |
| Poeret_2    | VDVHTAFPSLRLHHAVRGYWLTKVHIKRPTTGLLMYT----MATRFCEE |
| Astcal_2    | VDVHTAFPSLRLHHAVRGYWLTKVHIKRPTTGLLMYT----MATRFCEE |
| Hapbur_2    | VDVHTAFPSLRLHHAVRGYWLTKVHIKRPTTGLLMYT----MATRFCEE |
| Acapol_2B   | VDVHTAFPSLRLHHAVRGYWLTKVHIKRPTTGLLMYT----MATRFCEE |
| Ampoce_2A   | VDVHTAFPSLRLHHAVRGYWLTKVHIKRPTTGLLMYT----MATRFCEE |
| Acapol_2A   | VDVHTAFPSLRLHHAVRGYWLTKVHIKRPTTGLLMYT----MATRFCEE |
| Mayzeb_2    | VDVHTAFPSLRLHHAVRGYWLTKVHIKRPTTGLLMYT----MATRFCEE |
| Punnye_2    | VDVHTAFPSLRLHHAVRGYWLTKVHIKRPTTGLLMYT----MATRFCEE |
| Latcal_2    | VDVHTAFPSLRLHHAVRGYWLTKVHIKRPTTGLLMYT----MATRFCEE |
| Singra_2    | VNVRTAFPSLRLHHAVRGYWLTKVHIKRPTTGLLMYT----MATRFCDE |
| Auslim_2    | VDVRMAFPSLRLHHAVRGYWLTKVHIKRPTTGLLMYT----MATRFCEE |
| Monalb2     | VDVHTAFPSLRLHHAVRGYWLTKVHIKRPTTGLLMYT----LATRFCEE |
| Ampoce_2B   | VDVHTAFPSLRLHHAVRGYWLTKVHIKRPTTGLLMYT----MATRFCEE |
| Chiham_2    | VDVHTAFPSLRLHHAVRGYWLTKVHIKRPTTGLLMYT----MATRFCDE |
| Gasacu_2    | VDVHTAFPSLRLHHAVRGYWLTKVHIKRPTTGLLMYT----MATRFCEE |
| Gymacu_2    | VDVHTAFPSLRLHHAVRGYWLTKVHIKRPTTGLLMYT----MATRFCDE |
| Labber_2    | VDVHTAFPSLRLHHAVRGYWLTKVHIKRPTTGLLMYT----MATRFCEE |
| Cypvar_2    | VDVHTAFPSLRLHHAVRGYWLTKVHIKRPTTGLLMYT----MATRFCEE |
| Funhet_2    | VDVHTAFPSLRLHHAVRGYWLTKVHIKRPTTGLLMYT----MATRFCEE |
| Larcro_2    | VDVHTAFPSLRLHHAVRGYWLTKVHIKRPTTGLLMYT----MATRFCEE |
| Paroli_2    | VDVHTAFPSLRLHHAVRGYWLTKVHIKRPTTGLLMYT----MATRFCEE |
| Perflu_2    | VDVHTAFPSLRLHHAVRGYWLTKVHIKRPTTGLLMYT----MATRFCEE |
| Serdum_2    | VDVHTAFPSLRLHHAVRGYWLTKVHIKRPTTGLLMYT----MATRFCEE |

|             |                                                      |
|-------------|------------------------------------------------------|
| Stepar_2    | VDVRTAFPSLRLHHA VRGYWLTNNVHIKRP TTGLLMYT----MATRFCEE |
| Notcor_2    | VDVRTAFPSLRLHHA VRGYWLTNNVHIKRP TTGLLMYT----MATRFCDE |
| Treber_2    | VDVRTAFPSLRLHHA VRGYWLTNNVHIKRP TTGLLMYT----MATRFCDE |
| Serlaldor_2 | VDVRTAFPSLRLHHA VRGYWLTNNVHIKRP TTGLLMYT----MATRFCEE |
| Plaste_2    | VDVRTAFPSLRLHHA VRGYWLTNNVHIK-PTTGLLMYT----MATRFCDE  |
| Clabat_4    | LPVRMAYPSLRLVHA VRGYWLTNKVN IKRPSTGLLMYT----MATRFCDE |
| Ictpun_4A   | LPVHMAYPSLRLVHA VRGYWLTNKVN IKRPSTGLLMYT----MATRFCDE |
| Panhyp_4    | LPVRMAYPSLRLVHA VRGYWLTNKVN IKRPSTGLLMYT----MATRFCDE |
| Umbpyg_4    | LSVRTAYPSLRLIHA VRGYWLTNKIN IKRPSTGLLMYT----LATRFCDE |
| Esoluc_4    | LRVRTAYPSLRLIHA VRGYWLTNKIN IKRPSTGLLMYT----LATRFCDE |
| Plealt_4    | LRVKTAYPSLRLVHA VRGYWLTNKIN IKRPSTGLLMYT----LATRFCNE |
| Onckis_4B   | LRVRTAYPSLRLIHV VRGYWLTNKIN IKRPSTGLLMYT----LATRFCDE |
| Onckis_4A   | LRVRTAYPSLRLIHV VRGYWLTNKIN IKRPSTGLLMYT----LATRFCDE |
| Onctsh_4    | LRVRTAYPSLRLIHV VRGYWLTNKIN IKRPSTGLLMYT----LATRFCDE |
| Oncmvk_4    | LRVRTAYPSLRLIHV VRGYWLTNKIN IKRPSTGLLMYT----LATRFCDE |
| Corlav_4    | LRVRTAYPSLRLIHA VRGYWLTNKIN IKRPSTGLLMYT----LATRFCDE |
| Astmex_4A   | LPLRTAYPSLRLIHA VRGYWLTNKVN IKRPSTGLLMYT----MATRFCDE |
| Pygnat_4    | LPVHMAYPSLRLIHA VRGYWLTNKVN IKRPSTGLLMYT----MATRFCDE |
| Aloalo_4    | LRVRTAYPSLRLIHA VRGYWLTNRIHIKRPSTGLLMYT----LATRFCDE  |
| Cluhar_4    | LSVKPAYPSLRLIHA VRGYWLTNKIHIKRPSTGLLMYT----LATRFCDE  |
| Denclu_4    | LHLRMAYPSLRLFHA VRGYWLTNKVN IKRPSTGLLMYT----LATRFCDE |
| Konpun4     | LRVRTAYPSLRLIHA VRGYWLTNKIHIKRPSTGLLMYT----LATRFCDE  |
| Sarpil_4    | LRVRTAYPSLRLIHA VRGYWLTNRIHIKRPSTGLLMYT----LATRFCDE  |
| Caraur_4    | LKVRTAYPSLRLIHA VRGYWLTNKIN IKRPSTGLLMYT----MATRFCDE |
| Cteide_4    | LKVRMAYPSLRLIHA VRGYWLTNKIN IKRPSTGLLMYT----MATRFCDE |
| Petmar_4    | LPLRAAFPSLRLMHA VRGYWLTNKVYIKRP TTGLLMYT----LATRFCRE |
| Cypcar_4    | LRLRTAYPSLRLIHA VRGFWLTNKIN IKRPSTGLLMYT----LATRFCDE |
| Danrer_4    | LKVRTAYPSLRLIHA VRGFWLTNKIN IKRPSTGLLMYT----MATRFCDE |
| Misang_4    | LKVRTAYPSLRLIHA VRGYWLTNKIKI KRPSTGLLMYT----MTRFCDE  |
| Angjap_4    | LRVRTAYPSLRLIHA VRGYWLTNKVN IKRPSTGLLMYT----LATRFCDE |
| Cypcar_4A   | LRLRTAYPSLRLIHA VRGFWLTNKIN IKRPSTGLLMYT----LATRFCDE |
| Angang_4    | LRVRPPTPRSGLIHA VRGYWLTNKVN IKRPSTGLLMYT----LATRFCDE |
| Cypcar_4B   | LKVRTAYPSLRLIHA VRGYWLTNKIN IKRPSTGLLMYT----LATRFCDE |
| Sinans_4A   | LKVRTAYPSLRLIHA VRGYWLTNKIN IKRPSTGLLMYT----MATRFCDE |
| Sinans_4B   | LKVRTAYPSLRLIHA VRGYWLTNKIN IKRPSTGLLMYT----MATRFCDE |
| Singra_4A   | LKVRTAYPSLRLIHA VRGYWLTNKIN IKRPSTGLLMYT----MATRFCDE |
| Aptalb_4    | LPVRMAYPSLRLVHA VRGYWLTNKVN IKRPSTGLLMYT----MATRFCDE |
| Eigvir_4    | LPVHMAYPSLRLIHA VRGYWLTNKVN IKRPSTGLLMYT----LATRFCDE |
| Eleele_4    | LPVRMAYPSLRLIHA VRGYWLTNKVN IKRPSTGLLMYT----MATRFCDE |
| Parhas_4    | LPVRMAYPSLRLVHA VRGYWLTNKVN IKRPSTGLLMYT----MATRFCDE |
| Scifor_4    | LKLRTAYPSLRLIHA VRGYWLTNKIN IKRPSTGLLMYT----LATRFCDE |
| Gnapet4     | LLLRTAYPSLRLIHA VRGYWLTNKVN IKRPSTGLLMYT----LATRFCNE |
| Ostbic_4    | LRVRTAYPSLRLNHA VRGYWLTNKIKI KRPSTGLLMYT----LATRFCDE |
| Parkin_4    | LLLRTAYPSLRLIHA VRGYWLTNKVN IKRPSTGLLMYT----LATRFCNE |
| Panbuc_4    | LKVRTAYPSLRLIHA VRGYWLTNKVN IKRPSTGLLMYT----LATRFCDE |
| Erpcal4     | LKVRTAYPSLRLIHA VRGYWLTNKIN IKRPSTGLLMYT----LATRFCDE |
| Salsal_4    | LRVRTAYPSLRLIHV VRGYWLTNKIN IKRPSTGLLMYT----LATRFCDE |
| Saltru_4    | LRVRTAYPSLRLIHV VRGYWLTNKIN IKRPSTGLLMYT----LATRFCDE |
| Salalp_4    | LRVRTAYPSLRLIHV VRGYWLTNKIN IKRPSTGLLMYT----LATRFCDE |
| Salfon_4    | LRVRTAYPSLRLIHV VRGYWLTNKIN IKRPSTGLLMYT----LATRFCDE |
| Thythy_4    | LSVRTAYPSLRLIHA VRGYWLTNKIN IKRPSTGLLMYT----LATRFCDE |
| Calmil_4    | LSIQTAYPSLRLIHA VRGYWLTNKVYI KRPSTGLLMYT----LATRFCDE |
| Hetzeb_4    | LSIQTAYPSLRLIHA VRGYWLTNKIYI KRPSTGLLMYT----LATRFCDE |
| Rhityp_4    | LNlQTAYPSLRLIHA VRGYWLTNKIYI KRPSTGLLMYT----LATRFCDE |
| Scytor_4    | LNlQTAYPSLRLIHA VRGYWLTNKIYI KRPSTGLLMYT----LSTRFCDE |
| Squaca_4    | LSIQTAYPSLRLIHA VRGYWLTNKVYI KRPSTGLLMYT----LATRFCDE |
| Amical_4    | LKVRTAYPSLRLIHA VRGYWLTNKIN IKRPSTGLLMYT----LATRFCDE |
| Lepocu_4    | LKVRTAYPSLRLIHA VRGYWLTNKIN IKRPSTGLLMYT----LATRFCDE |
| Agema_4     | LPVRMAYPSLRLVHA VRGYWLTNKVN IKRPSTGLLMYT----MATRFCDE |
| Anocar_4    | LKVRTAYPSLRLIHA VRGYWLTNKVFI KRPSTGLLMYT----LATRFCDE |
| Canlupfam_4 | LKVRTAYPSLRLIHA VRGYWLTNKVPI KRPSTGLLMYT----LATRFCDE |
| Crigri_4    | LKVRTAYPSLRLIHA VRGYWLTNKVPI KRPSTGLLMYT----LATRFCDE |
| Galgai_4    | LKVRTAYPSLRLIHA VRGYWLTNKVHI KRPSTGLLMYT----LATRFCDE |
| Mesaur_4    | LKVRTAYPSLRLIHA VRGYWLTNKVPI KRPSTGLLMYT----LATRFCDE |
| Homsap_4    | LKVRTAYPSLRLIHA VRGYWLTNKVPI KRPSTGLLMYT----LATRFCDE |
| Notscuscu_4 | LKVQTAYPSLRLIHA VRGYWLTNKVYI KRPSTGLLMYT----LATRFCDE |
| Psetextex_4 | LKVRTAYPSLRLIHA VRGYWLTNKVYI KRPSTGLLMYT----LATRFCDE |
| Musmus_4    | LQVRTAYPSLRLIHA VRGYWLTNKVPI KRPSTGLLMYT----LATRFCDE |
| Pogvit_4    | LKVRTAYPSLRLIHA VRGYWLTNKVFI KRPSTGLLMYT----LATRFCDE |
| Promuc_4    | LKVRTAYPSLRLIHA VRGYWLTNKVYI KRPSTGLLMYT----LATRFCDE |
| Pantro_4    | LKVRTAYPSLRLIHA VRGYWLTNKVPI KRPSTGLLMYT----LATRFCDE |
| Pytbiv_4    | LKVRTAYPSLRLIHA VRGYWLTNKVYI KRPSTGLLMYT----LATRFCDE |
| Ratnor_2    | VNVRTAYPSLRLHHA VRGYWLTNKVHIKRP TTGLLMYT----LATRFCNQ |
| Ratnor_4    | LKVRTAYPSLRLIHA VRGYWLTNKVPI KRPSTGLLMYT----LATRFCDE |
| Siltro_2    | INVHTAYPSLRLHHA VRGYWLTNKVHIKRP TTGLIMYT----LATRFCNR |
| Siltro_4    | LKVRTAYPSLRLIHA VRGYWLTNKVQI KRPSTGLLMYT----LATRFCDE |
| Susscr_4    | LKVRTAYPSLRLIHA VRGYWLTNKVPI KRPSTGLLMYT----LATRFCDE |

|              |                                                    |
|--------------|----------------------------------------------------|
| Taegut_4     | LKVRTAYPSLRLIHAVRGYWLTKNVHIKRPSTGLLMYT----LATRFCDE |
| Termextri_4M | LKVRTAYPSLRLIHAVRGYWLTKNVHIKRPSTGLLMYT----LTTRFCDE |
| Thasirsir_4  | LKVRTAYPSLRLIHAVRGYWLTKNVYIKRPSTGLLMYT----LATRFCDE |
| Xenlae_4B    | LKVRTAYPSLRLIHAVRGYWLTKNVQIKRPSTGLLMYT----LATRFCDE |
| Xenlae_4A    | LKVRTAYPSLRLIHAVRGYWLTKNVQIKRPSTGLLMYT----LATRFCDE |
|              | 201                                                |
| Latcal_3     | IHLYG----FWPFGWDPNTG---KELPYHYDCKGKFTTKWQESHQLPA   |
| Perflu_3     | IHLYG----FWPFGWDPNTG---KELPYHYDCKGKFTTKWQESHQLPA   |
| Serdum_3     | IHLYG----FWPFGWDPNTG---KELPYHYDCKGKFTTKWQESHQLPA   |
| Stepar_3     | IHLYG----FWPFGWDPNTG---KELPYHYDCKGKFTTKWQESHQLPA   |
| Tetcal_3     | IHLYG----FWPFGWDPNTG---KELPYHYDCKGKFTTKWQESHQLPA   |
| Monalb_3     | IHLYG----FWPFGWDPNTG---KELPYHYDCKGKFTTKWQESHQLPA   |
| Molmol_3     | IHLYG----FWPFGWDPNTG---KELPYHYDCKGKFTTKWQESHQLPA   |
| Takrub_3     | IHLYG----FWPFGWDPNTG---KELPYHYDCKGKFTTKWQESHQLPT   |
| Canlupfam_3  | IHLYG----FWPFGFDPNTR---EDLPYHYDCKGKFTTKWQESHQLPA   |
| Bostau_3     | IHLYG----FWPFGFDPNTR---EDLPYHYDCKGKFTTKWQESHQLPA   |
| Homsap_3     | IHLYG----FWPFGFDPNTR---EDLPYHYDCKGKFTTKWQESHQLPA   |
| Siltro_3     | IHLYG----FWPFGWDPNTG---KELPYHYDCKGKFTTKWQESHQLPA   |
| Anocar_3     | IHLYG----FWPFGFDPNTR---EDLPYHYDCKGKFTTKWQESHQLPA   |
| Musmus_3     | IHLYG----FWPFGFDPNTR---EDLPYHYDCKGKFTTKWQESHQLPA   |
| Pantro_3     | IHLYG----FWPFGFDPNTR---EDLPYHYDCKGKFTTKWQESHQLPA   |
| Ratnor_3     | IHLYG----FWPFGFDPNTR---EDLPYHYDCKGKFTTKWQESHQLPA   |
| Galgal_3     | IHLYG----FWPFGFDPNTR---EDLPYHYDCKGKFTTKWQESHQLPA   |
| Lepocu_3     | IHLYG----FWPFGWDPNTG---KELPYHYDCKGKFTTKWQESHQLPT   |
| Tetnig_3     | IHLYG----FWPFGWDPNTG---RELPHYHYDCKGKFTTKWQESHQLPT  |
| Squaca_3     | IHLYG----FWPFGWDPNTG---KELPYHYDCKGKFTTKWQESHQLPA   |
| Perfla_3     | IHLYG----FWPFGWDPNTG---KELPYHYDCKGKFTTKWQESHQLPA   |
| Salsal_3     | IHLYG----FWPFGWDPNTG---KELPYHYDCKGKFTTKWQESHQLPA   |
| Serlaldor_3  | IHLYG----FWPFGWDPNTG---KELPYHYDCKGKFTTKWQESHQLPA   |
| Treber_3     | IHLYG----FWPFGWDPNTG---NDLPYHYDCKGKFTTKWQETHQLPT   |
| Cynsem_3     | IHLYG----FWPFGWDPNTG---KELPYHYDCKGKFTTKWQESHQLPA   |
| Paroli_3     | IHLYG----FWPFGWDPNTG---KELPYHYDCKGKFTTKWQETHQLPS   |
| Paroli_3b    | IHLYG----FWPFGWDPNTG---KELPYHYDCKGKFTTKWQESHQLPA   |
| Plaste_3     | IHLYG----FWPFGWDPNTG---NDLPYHYDCKGKFTTKWQETHQLPS   |
| Plaste_3b    | IHLYG----FWPFGWDPNTG---KELPYHYDCKGKFTTKWQESHQLPA   |
| Erpcal3      | IHLYG----FWPFGWDPNTG---KELPYHYDCKGKFTTKWQESHQLPT   |
| Calmil_3b    | IHLYG----FWPFGWDPNTG---RELPHYHYDCKGKFTTNWQETHQLPA  |
| Hetzeb_3     | IHLYG----FWPFGWDPNTG---KELPYHYDCKGKFTTKWQESHQLPA   |
| Latcha_3     | IHLYG----FWPFGWDPNSG---KELPYHYDCKGKFTTKWQESHQLPA   |
| Anates_3     | IHLYG----FWPFGWDPNTG---KELPYHYDCKGKFTTKWQESHQLPA   |
| Ampcit3      | IHLYG----FWPFGWDPNTG---KELPYHYDCKGKFTTKWQESHQLPA   |
| Auslim_3     | VHLYG----FWPFGWDPNTG---KELPYHYDRKGKFTTKWQESHQLPA   |
| Cypvar_3     | IHLYG----FWPFGWDPNTG---KELPYHYDCKGKFTTKWQESHQLPA   |
| Krymar_3     | VHLYG----FWPFGWDPNTG---KELPYHYDRKGKFTTKWQESHQLPA   |
| Funhet_3     | IHLYG----FWPFGWDPNTG---KELPYHYDCKGKFTTKWQESHQLPA   |
| Gamaff3      | IHLYG----FWPFGWDPNTG---KELPYHYDCKGKFTTKWQESHQLPA   |
| Orylat_3     | IHLYG----FWPFGWDPNTG---KELPYHYDRKGKFTTKWQESHQLPA   |
| Orenil_3     | IHLYG----FWPFGWDPNTG---KELPYHYDCKGKFTTKWQESHQLPA   |
| Mayzeb_3     | IHLYG----FWPFGWDPNTG---KELPYHYDCKGKFTTKWQESHQLPA   |
| Punnye_3     | IHLYG----FWPFGWDPNTG---KELPYHYDCKGKFTTKWQESHQLPA   |
| Punnye_3a    | IHLYG----FWPFGWDPNTG---KELPYHYDCKGKFTTKWQESHQLPA   |
| Neobri_3     | IHLYG----FWPFGWDPNTG---KELPYHYDCKGKFTTKWQESHQLPA   |
| Misang_3     | VHLYG----FWPFGWDPNTG---KELPYHYDCKGKFTTKWQESHQLPT   |
| Sinrhi3      | VHLYG----FWPFGWDPNTG---KELPYHYDCKGKFTTKWQESHQLPT   |
| Singra_3     | VHLYG----FWPFGWDPNTG---KELPYHYDCKGKFTTKWQESHQLPT   |
| Hapbur_3     | IHLYG----FWPFGWDPNTG---KELPYHYDCKGKFTTKWQESHQLPA   |
| Astcal_3     | IHLYG----FWPFGWDPNTG---KELPYHYDCKGKFTTKWQESHQLPA   |
| Notfur_3     | IHLYG----FWPFGWDPNTG---KELPYHYDRKGKFTTKWQESHQLPA   |
| Cypcar_3     | -----                                              |
| Poefor3      | IHLYG----FWPFGWDPNTG---KELPYHYDCKGKFTTKWQESHQLPA   |
| Poelat_3     | IHLYG----FWPFGWDPNTG---KELPYHYDCKGKFTTKWQESHQLPA   |
| Poeret_3     | VHLYG----FWPFGWDPNTG---KELPYHYDCKGKFTTKWQESHQLPA   |
| Angang_3     | IHLYG----FWPFGWDPNTG---KELPYHYDCKGKFTTKWQESHQLPS   |
| Xipmac_3     | IHLYG----FWPFGWDPNTG---KELPYHYDCKGKFTTKWQESHQLPA   |
| Masarm_3     | IHLYG----FWPFGWDPNTG---KELPYHYDCKGKFTTKWQESHQLPA   |
| Permag_3     | -----LPYHYDCKGKFTTKWQESHQLPA                       |
| Gnapet3      | VHLYG----FWPFGWDPSTG---RELPHYHYDRKGKFTTKWQESHQLPA  |
| Ostbic_3     | VHLYG----FWPFGWDPNTG---KELPYHYDRKGKFTTKWQETHQLPT   |
| Gadmor_3     | IHLYG----FWPFGWDPNTG---KELPYHYDCKGKFTTKWQESHQLPA   |
| Scifor_3     | VHLYG----FWPFGWDPNTG---KELPYHYDRKGKFTTKWRESHELPS   |
| Acapol3      | IHLYG----FWPFGWDPNTG---KELPYHYDCKGKFTTKWQESHQLPA   |
| Ampoce_3     | IHLYG----FWPFGWDPNTG---KELPYHYDCKGKFTTKWQESHQLPA   |
| Scifor_3b    | IHLYG----FWPFGWDPISG---KGLPHYHYDCKGKFTTKWQESHQLPA  |
| Ostbic_3b    | IHLYG----FWPFGWDPISG---KGLPHYHYDCKGKFTTKWQESHQLPA  |
| Parkin_3     | VHLYG----FWPFGWDPSTG---RELPHYHYDRKGKFTTKWQESHQLPA  |
| Amppe3       | IHLYG----FWPFGWDPNTG---KELPYHYDCKGKFTTKWQESHQLPA   |
| Oncmyk_3     | IHLYG----FWPFGWDPNTG---KELPYHYDCKGKFTTKWQESHQLPA   |

|             |           |                |                       |                |
|-------------|-----------|----------------|-----------------------|----------------|
| Gasacu_3    | IHLYG---- | FWPFGWDPNTG--- | KELPYHHYDKKGT         | KFTTKWQESHQLPA |
| Labber_3    | IHLYG---- | FWPFGWDPNTG--- | KELPYHHYDKKGT         | KFTTKWQESHQLPA |
| Panbuc_3    | VHLYG---- | FWPFGWDPASG--- | RELPYHHYDKKGT         | KFTTKWQESHQLPA |
| Parhas3     | VHLYG---- | FWPFGWDPNTG--- | KDLPYHHYDKKGT         | KFTTKWQESHQLPT |
| Cluhar_3    | IHLYG---- | FWPFGWDPNTG--- | KELPYHHYDKKGT         | KFTTKWQESHQLPT |
| Aloalo_3    | IHLYG---- | FWPFGWDPNTG--- | KELPYHHYDKKGT         | KFTTKWQESHQLPT |
| Panhyp_3    | VHLYG---- | FWPFGWDPNTG--- | KELPYHHYDKKGT         | KFTTKWQESHQLPT |
| Eleele_3    | VHLYG---- | FWPFGWDPNTG--- | KELPYHHYDKKGT         | KFTTKWQESHQLPT |
| Denclu_3    | IHLYG---- | FWPFGWDPNTG--- | KELPYHHYDKKGT         | KFTTKWQESHQLPT |
| Sarpil_3    | IHLYG---- | FWPFGWDPNTG--- | KELPYHHYDKKGT         | KFTTKWQESHQLPT |
| Eigvir_3    | VHLYG---- | FWPFGWDPNTG--- | KELPYHHYDKKGT         | KFTTKWQESHQLPT |
| Aptalb_3    | VHLYG---- | FWPFGWDPNTG--- | KDLPYHHYDKKGT         | KFTTKWQESHQLPT |
| Sinans_3    | VHLYG---- | FWPFGWDPNTG--- | KELPYHHYDKKGT         | KFTTKWQESHQLPT |
| Pygnat_3    | IHLYG---- | FWPFGWDPNTG--- | KELPYHHYDKKGT         | KFTTKWQESHQLPT |
| Astmex_3    | IHLYG---- | FWPFGWDPNTG--- | KELPYHHYDKKGT         | KFTTKWQESHQLPT |
| Caraur_3    | VHLYG---- | FWPFGWDPNTG--- | KELPYHHYDKKGT         | KFTTKWQESHQLPT |
| Danrer_3    | VHLYG---- | FWPFGWDPNTG--- | KELPYHHYDKKGT         | KFTTKWQESHQLPT |
| Ictpun_3    | IHLYG---- | FWPFGWDPNTG--- | KELPYHHYDKKGT         | KFTTKWQESHQLPT |
| Plealt_3    | IHLYG---- | FWPFGWDPNTG--- | KELPYHHYDKKGT         | KFTTKWQESHQLPA |
| Plealt_9    | IHLYG---- | FWPFGWDPNTG--- | KELPYHHYDKKGT         | KFTTKWQETHQLPS |
| Gasacu_9    | IHLYG---- | FWPFGWDPNTG--- | NDLPYHHYDKKGT         | KFTTKWQETHQLPS |
| Parkin_9    | VHLYG---- | FWPFGWDPISG--- | KGLPYHYFDKKGT         | KFTTKWQESHQLPA |
| Acapol_9    | IHLYG---- | FWPFGWDPNTG--- | KELPYHHYDKKGT         | KFTTKWQETHQLPS |
| Larcro_9    | IHLYG---- | FWPFGWDPNTG--- | KDLPYHHYDKKGT         | KFTTKWQETHQLPS |
| Notcor_9    | IHLYG---- | FWPFGWDPNTG--- | NDLPYHHYDKKGT         | KFTTKWQETHQLPT |
| Latcal_9    | IHLYG---- | FWPFGWDPNTG--- | KELPYHHYDKKGT         | KFTTKWQETHQLPS |
| Serlaldor_9 | IHLYG---- | FWPFGWDPNTG--- | KELPYHHYDKKGT         | KFTTKWQETHQLPS |
| Monalb_9    | VHLYG---- | FWPFGWDPNTG--- | KELPYHHYDKKGT         | KFTTKWQEAHQLPS |
| Serdum_9    | IHLYG---- | FWPFGWDPNTG--- | KELPYHHYDKKGT         | KFTTKWQETHQLPS |
| Perflu_9    | IHLYG---- | FWPFGWDPNSG--- | KDLPYHHYDKKGT         | KFTTKWQETHQLPS |
| Perfla_9    | IHLYG---- | FWPFGWDPNSG--- | KDLPYHHYDKKGT         | KFTTKWQETHQLPS |
| Stepar_9    | IHLYG---- | FWPFGWDPNTG--- | KELPYHHYDKKGT         | KFTTKWQETHQLPS |
| Molmol_9    | IHLYG---- | FWPFGWDPNTG--- | NDLPYHHYDKKGT         | KFTTKWQETHQLPS |
| Hipcom_9    | IHLYG---- | FWPFGWDPNTG--- | KDLPYHHYDKKGT         | KFTTKWQETHQLPS |
| Takrub_9 B  | IHLYG---- | FWPFGWDPNTG--- | KELPYHHYDKKGT         | KFTTKWQETHQLPT |
| Takrub_9    | IHLYG---- | FWPFGWDPNTG--- | KELPYHHYDKKGT         | KFTTKWQETHQLPT |
| Cynsem_9    | IHLYG---- | FWPFGWDPNTG--- | KDLPYHHYDKKGT         | KFTTKWQETHQLPS |
| Scomax_9    | IHLYG---- | FWPFGWDPNTG--- | KDLPYHHYDKKGT         | KFTTKWQETHQLPS |
| Corlav_9    | IHLYG---- | FWPFGWDPNTG--- | KELPYHHYDKKGT         | KFTTKWQETHQLPS |
| Oncmyk_9    | IHLYG---- | FWPFGWDPNTG--- | KELPYHHYDKKGT         | KFTTKWQETHQLPS |
| Salsal_9    | IHLYG---- | FWPFGWDPNTG--- | KELPYHHYDKKGT         | KFTTKWQESHQLPA |
| Onctsh_9    | IHLYG---- | FWPFGWDPNTG--- | KELPYHHYDKKGT         | KFTTKWQETHQLPS |
| Salalp_9    | IHLYG---- | FWPFGWDPNTG--- | KELPYHHYDKKGT         | KFTTKWQETHQLPS |
| Ampoce_9    | IHLYG---- | FWPFGWDPNTG--- | KELPYHHYDKKGT         | KFTTKWQETHQLPS |
| Ampper9     | IHLYG---- | FWPFGWDPNTG--- | KELPYHHYDKKGT         | KFTTKWQETHQLPS |
| Labber_9    | IHLYG---- | FWPFGWDPNTG--- | KDLPYHHYDKKGT         | KFTTKWQETHQLPT |
| Umbpyg_3B   | IHLYG---- | FWPFGWDPNTG--- | KELPYHHYDKKGT         | KFTTKWQESHQLPA |
| Esoluc_3b   | IHLYG---- | FWPFGWDPNTG--- | KELPYHHYDRKGT         | KFTTKWQESHQLPA |
| Gadmor_9    | IHLYG---- | FWPFGWDPNTG--- | KDLPYHHYDKKGT         | KFTTKWQETHQLPS |
| Umbpyg_9    | IHLYG---- | FWPFGWDPNTG--- | KELPYHHYDKKGT         | KFTTKWQETHQLPS |
| Esoluc_9    | IHLYG---- | FWPFGWDPNTG--- | KELPYHHYDKKGT         | KFTTKWQETHQLPS |
| Permag_9    | IHLYG---- | FWPFGWDPNTG--- | KDLPYHHYDRKGT         | KFTTKWQETHQLPN |
| Bolpec_9    | IHLYG---- | FWPFGWDPNTG--- | KDLPYHHYDRKGT         | KFTTKWQETHQLPN |
| Poefor9     | IHLYG---- | FWPFGWDPNTG--- | KELPYHHYDKKGT         | KFTTKWQETHQLPS |
| Masarm_9    | IHLYG---- | FWPFGWDPNTG--- | KELPYHHYDKKGT         | KFTTKWQETHQLPS |
| Angjap_9    | IHLYG---- | FWPFGWDPNTG--- | KELPYHHYDKKGT         | KFTTKWQESHQLPS |
| Poelat_9    | IHLYG---- | FWPFGWDPNTG--- | KELPYHHYDKKGT         | KFTTKWQETHQLPS |
| Poeret_9    | IHLYG---- | FWPFGWDPNTG--- | KELPYHHYDKKGT         | KFTTKWQETHQLPS |
| Xipmac_9    | IHLYG---- | FWPFGWDPNTG--- | KDLPYHHYDKKGT         | KFTTKWQETHQLPS |
| Hapbur_9    | IHLYG---- | FWPFGWDPNTG--- | KDLPYHHYDKKGT         | KFTTKWQETHQLPS |
| Orylat_9    | IHLYG---- | FWPFGWDPNTG--- | KDLPYHHYDKKGT         | KFTTKWQETHQLPS |
| Gamaff_9    | IHLYG---- | FWPFGWDPNTG--- | KDLPYHHYDKKGT         | KFTTKWQETHQLPS |
| Neobri_9    | IHLYG---- | FWPFGWDPNTG--- | KDLPYHHYDKKGT         | KFTTKWQETHQLPS |
| Funhet_9    | IHLYG---- | FWPFGWDPNTG--- | KELPYHHYDKKGT         | KFTTKWQETHQLPS |
| Punnye_9    | IHLYG---- | FWPFGWDPNTG--- | KDLPYHHYDKKGT         | KFTTKWQETHQLPS |
| Cypvar_9    | IHLYG---- | FWPFGWDPNTG--- | KELPYHHYDKKGT         | KFTTKWQETHQLPS |
| Krymar_9    | IHLYG---- | FWPFGWDPNTG--- | KELPYHHYDKKGT         | KFTTKWQETHQLPS |
| Notfur_9    | IHLYG---- | FWPFGWDPNTG--- | KELPYHHYDKKGT         | KFTTKWQETHQLPS |
| Notpie_9    | IHLYG---- | FWPFGWDPNTG--- | KELPYHHYDKKGT         | KFTTKWQETHQLPS |
| Orenil_9    | IHLYG---- | FWPFGWDPNTG--- | KDLPYHHYDKKGT         | KFTTKWQETHQLPS |
| Auslim_9    | IHLYG---- | FWPFGWDPNTG--- | KELPYHHYDKKGT         | KFTTKWQETHQLPS |
| Anates_9    | IHLYG---- | FWPFGWDPNTG--- | KDLPYHHYDKKGT         | KFTTKWQETHQLPS |
| Astcal_9    | IHLYG---- | FWPFGWDPNTG--- | KDLPYHHYDKKGT         | KFTTKWQETHQLPS |
| Mayzeb_9    | IHLYG---- | FWPFGWDPNTG--- | KDLPYHHYDKKGT         | KFTTKWQETHQLPS |
| Orymel_9    | IHLYG---- | FWPFGWDPNTG--- | KELPYHHYDKKGT         | KFTTKWQETHQLPS |
| Ampcit9     | IHLYG---- | FWPFGWDPNTG--- | KDLPYHHYDKKGT         | KFTTKWQETHQLPS |
| Macfas_2    | IYLYG---- | FWPFPLDQN-Q--- | NPVKYHHYDSLKYGYTSQASP | -HTMPL         |

|             |                                                    |
|-------------|----------------------------------------------------|
| Macmul_2    | IYLYG----FWPFLDQN-Q---NPVKYHYDLSLKYGYTSQASP-HTMPL  |
| Macnem_2    | IYLYG----FWPFLDQN-Q---NPVKYHYDLSLKYGYTSQASP-HTMPL  |
| Musmus_2    | IYLYG----FWPFLDQN-Q---NPVKYHYDLSLKYGYTSQASP-HTMPL  |
| Ponabe_2    | IYLYG----FWPFLDQN-Q---NPVKYHYDLSLKYGYTSQASP-HTMPL  |
| Papanu_2    | IYLYG----FWPFLDQN-Q---NPVKYHYDLSLKYGYTSQASP-HTMPL  |
| Nomleu_2    | IYLYG----FWPFLDQN-Q---NPVKYHYDLSLKYGYTSQASP-HTMPL  |
| Pantro_2    | IYLYG----FWPFLDQN-Q---NPVKYHYDLSLKYGYTSQASP-HTMPL  |
| Latcha_2    | IHLYG----FWPFRDHS-E---RPVKYHYDLSLTYEYTSQASP-HTMPL  |
| Gnapet2     | IHLYG----FWPFALGPQ-G---NPVKYHYDLSLTYQYTSQASP-HTMPL |
| Panbuc_2b   | IHLYG----FWPFRDVG-G---RPVKYHYDALTGYTSQAGP-HAMPL    |
| Ostbic_2    | IHLYG----FWPFPLGPH-G---NPVKYHYDALTGYEYTSQVGP-HTMPL |
| Sinrhi2     | IHLYG----FWPFAHDPD-G---KSVKYHYDTLTYHYTSGASP-HTMPL  |
| Hetzeb_2    | IHLYG----FWPFPKDQK-G---NVVKYHYDLSLTYEYNSRATP-HTMPL |
| Hipcom_2    | IHLYG----FWPFSDAA-G---KAVKYHYDTLKYEYTSSSSP-HSMPL   |
| Prigla_2    | IHLYG----FWPFPKDQK-G---NVVKYHYDLSLTYEYNSRATP-HTMPL |
| Scytor_2    | IHLYG----FWPFPKDQK-G---NAVKYHYDLSLTYEYNSRATP-HTMPL |
| Tetcal_2    | IHLYG----FWPFKDPK-G---NAVKYHYDLSLTYEYNSRATP-HTMPL  |
| Rhityp_2    | IHLYG----FWPFKDHK-G---NAVKYHYDLSLTYEYNSRATP-HTMPL  |
| Parkin_2b   | IHLYG----FWPFSDAQ-G---NPVKYHYDLSLTYGYTSRTSP-HTMPL  |
| Angang_2    | IHLYG----FWPFQDPQ-G---NPMKYHYDTLTYEYDSHSSP-HTMPL   |
| Pygnat_2    | IHLYG----FWPFRDSE-G---KPVKYHYDTLTYQYTSSSSP-HTMPL   |
| Parkin_2    | IHLYG----FWPFALGPQ-G---NPVKYHYDLSLTYEYTSQASP-HTMPL |
| Gorgor_2    | IYLYG----FWPFLDQN-Q---NPVKYHYDLSLKYGYTSQASP-HTMPL  |
| Thegel_2    | IYLYG----FWPFLDQN-Q---NPVKYHYDLSLKYGYTSQASP-HTMPL  |
| Tupchi_2    | IYLYG----FWPFLDQN-Q---NPVKYHYDLSLKYGYTSQASP-HTMPL  |
| Galgai_2    | IHLYG----FWPFLDQN-Q---QPVKYHYDLSLKYGYTSQASP-HTMPL  |
| Eleele_2    | IHLYG----FWPFSGPE-G---KPVKYHYDALTGYEYTSSSSP-HTMPL  |
| Danrer_2    | IHLYG----FWPFAHDPD-G---KPVKYHYDTLTYHYTSSASP-HTMPL  |
| Canlupfam_2 | IYLYG----FWPFLDQN-Q---NPVKYHYDLSLKYGYTSQASP-HTMPL  |
| Aloalo_2    | IHLYG----FWPFHRDHQ-G---KRVKYHYDTLTYEFTSRASP-HTMPL  |
| Astmex_2    | IHLYG----FWPFRDSE-G---KPVKYHYDTLKYQYTSSSSP-HTMPL   |
| Sinans_2    | IHLYG----FWPFAHDPD-G---KPVKYHYDTLTYHYTSSASP-HTMPL  |
| Scifor_2    | IHLYG----FWPFLGPH-G---NPVKYHYDALTGYEYTSQVGP-HTMPL  |
| Ceraty_2    | IYLYG----FWPFLDQN-Q---NPVKYHYDLSLKYGYTSQASP-HTMPL  |
| Anocar_2    | IYLYG----FWPFRDQD-Q---NPVKYHYDTLKYGYMSQTSP-HTMPL   |
| Anates_2    | IHLYG----FWPFLDPQ-G---KPVKYHYDALKYEYTSSSSP-HTMPL   |
| Ampbic_2    | IHLYG----FWPFLDPH-G---KPVKYHYDTLKYEYTSSSSP-HTMPL   |
| Sarpil_2    | IHLYG----FWPFHRDHQ-G---KRVKYHYDTLTYQFTSRASP-HTMPL  |
| Xenlae_2    | IYLYG----FWPFRDLH-Q---NPVKYHYDLSLKYGYTSQAGP-HAMPL  |
| Cluhar_2    | IHLYG----FWPFHRDHQ-G---NVVKYHYDTLTYEFTSRASP-HTMPL  |
| Cypcar_2    | IHLYG----FWPFAHDPD-G---KPVKYHYDMLTYHYTSSASP-HTMPL  |
| Denclu_2    | IHLYG----FWPFHRDAQ-G---KPVKYHYDALTGYEYTSASSP-HTMPL |
| Notpie_2    | IHLYG----FWPFLDPK-G---KTVKYHYDTLKYEYTSSSSP-HTMPL   |
| Ercal2      | IHLYG----FWPFLDQK-G---NSVKYHYDLSLRYEFTSSSP-HAMPL   |
| Amical_2    | IHLYG----FWPFSRGA-G---NPVKYHYDLSLTYEYTAQSSP-HTMPL  |
| Lepocu_2    | IHLYG----FWPFLGPN-G---LPVKYHYDLSLTYEYRAQSSP-HSMPV  |
| Homsap_2    | IYLYG----FWPFLDQN-Q---NPVKYHYDLSLKYGYTSQASP-HTMPL  |
| Bostau_2    | IYLYG----FWPFLDQN-Q---NPVKYHYDLSLKYGYTSQASP-HTMPL  |
| Caraur_2    | IHLYG----FWPFAHDPD-G---KPVKYHYDTLTYHYTSSASP-HTMPL  |
| Thythy_2B   | IHLYG----FWPFKDSQ-G---KPVKYHYDTLTYEYTSASHP-HTMPL   |
| Onctsh_2B   | IHLYG----FWPFQDSQ-G---KPVKYHYDTLTYEYTSASHP-HTMPL   |
| Salsal_2B   | IHLYG----FWPFQDSQ-G---KSVKYHYDTLTYEYTSASHP-HTMPL   |
| Oncmyk_2B   | IHLYG----FWPFQDSQ-G---KPVKYHYDTLTYEYTSASHP-HTMPL   |
| Onckis_2B   | IHLYG----FWPFQDSQ-G---KPVKYHYDTLTYEYTSASHP-HTMPL   |
| Salsal_2A   | IHLYG----FWPFRDSQ-G---KPVKYHYDTLTYEYTSASHP-HAMPL   |
| Thythy_2A   | IHLYG----FWPFRNSQ-G---KPVKYHYDTLTYEYTSASHP-HTMPL   |
| Salalp_2A   | IHLYG----FWPFRDSQ-G---KPVKYHYDTLTYEYTSASHP-HTMPL   |
| Corlav_2A   | IHLYG----FWPFRDSQ-G---IPVKYHYDTLTYEYTSASHP-HTMPL   |
| Cormar_2A   | IHLYG----FWPFRDSQ-G---IPVKYHYDTLTYEYTSASHP-HTMPL   |
| Onctsh_2A   | IHLYG----FWPFRDSQ-G---KPVKYHYDTLTYEYTSASHP-HTMPL   |
| Oncmyk_2A   | IHLYG----FWPFQDSQ-G---KPVKYHYDTLTYEYTSASHP-HTMPL   |
| Neobri_2    | IHLYG----FWPFPLDPQ-G---KPVKYHYDTLKYEYTSSSSP-HTMPL  |
| Takrub_2    | IHLYG----FWPFSDPH-G---RPVKYHYDTLKYEYTSSSSP-HTMPL   |
| Tetnig_2    | IHLYG----FWPFPLDPR-G---RPVKYHYDTLKYEYTSSSSP-HTMPL  |
| Orenil_2    | IHLYG----FWPFPLDPQ-G---KPVKYHYDTLKYEYTSSSSP-HTMPL  |
| Orylat_2    | IHLYG----FWPFVDSH-G---KAVKYHYDLSLKYEYTSSSSP-HTMPL  |
| Krymar_2    | IHLYG----FWPFALDPR-G---RPVKYHYDALKYEYTSSSSP-HAMPL  |
| Notfur_2    | IHLYG----FWPFPLDPK-G---KTVKYHYDTLKYEYTSSSSP-HTMPL  |
| Poelat_2    | IHLYG----FWPFPLGPQ-G---RPVKYHYDTLKYEYTSSSSP-HTMPL  |
| Gadmor_2    | IHLYG----FWPFPLDPR-G---RPVKYHYDTLKYDYTSASSP-HTMPL  |
| Xipmac_2    | IHLYG----FWPFPLGPQ-G---RPVKYHYDTLKYEYTSSSSP-HTMPL  |
| Poeret_2    | IHLYG----FWPFPLGPQ-G---RPVKYHYDTLKYEYTSSSSP-HTMPL  |
| Astcal_2    | IHLYG----FWPFLDPQ-G---KPVKYHYDTLKYEYTSSSSP-HTMPL   |
| Hapbur_2    | IHLYG----FWPFLDPQ-G---KPVKYHYDTLKYEYTSSSSP-HTMPL   |
| Acapol_2B   | IHLYG----FWPFPLDPH-G---KPVKYHYDTLKYEYTSSSSP-HTMPL  |
| Ampoce_2A   | IHLYG----FWPFPLDPH-G---NPVKYHYDTLKYEYTSSSSP-HTMPL  |
| Acapol_2A   | IHLYG----FWPFPLDPH-G---KPVKYHYDTLKYEYTSSSSP-HTMPL  |

|             |                                                    |
|-------------|----------------------------------------------------|
| Mayzeb_2    | IHLYG----FWPFSLDPQ-G---KPVKYHYDYLTKYEYTSSSSP-HTMPL |
| Punnye_2    | IHLYG----FWPFSLDPQ-G---KPVKYHYDYLTKYEYTSSSSP-HTMPL |
| Latcal_2    | IHLYG----FWPFPLDPQ-G---KPVKYHYDYLTKYEYTSSSSP-HTMPL |
| Singra_2    | IHLYG----FWPFAHDPD-G---KPVKYHYDYLTKYEYTSSSSP-HTMPL |
| Auslim_2    | IHLYG----FWPFPLDPR-G---RPVKYHYDYLTKYEYTSSSSP-HTMPL |
| Monalb2     | IHLYG----FWPFPLDLQ-G---KPVKYHYDYLTKYEYTSSSSP-HTMPL |
| Ampoce_2B   | IHLYG----FWPFPLDPH-G---NPVKYHYDYLTKYEYTSSSSP-HTMPL |
| Chiham_2    | IHLYG----FWPFSDHPQ-G---KPVKYHYDYLTKYEYTSSSSP-HTMPL |
| Gasacu_2    | IHLYG----FWPFRHDPQ-G---RPVKYHYDYLTKYEYTSSSSP-HTMPL |
| Gymacu_2    | IHLYG----FWPFSDHPQ-G---KPVKYHYDYLTKYEYTSSSSP-HTMPL |
| Labber_2    | IHLYG----FWPFPLDPQ-G---RPVKYHYDYLTKYEYTSSSSP-HTMPL |
| Cypvar_2    | IHLYG----FWPFPLDPQ-G---RPVKYHYDYLTKYEYTSSSSP-HTMPL |
| Funhet_2    | IHLYG----FWPFPLGPH-G---RPVKYHYDYLTKYEYTSSSSP-HTMPL |
| Larcro_2    | IHLYG----FWPFPLDPQ-G---KPVKYHYDYLTKYEYTSSSSP-HTMPL |
| Paroli_2    | IHLYG----FWPFALDPQ-G---KPVKYHYDYLTKYEYTSSSSP-HTMPL |
| Perflu_2    | IHLYG----FWPFPLDPQ-G---RSVKYHYDYLTKYEYTSSSSP-HTMPL |
| Serdum_2    | IHLYG----FWPFALDPQ-G---KPVKYHYDYLTKYEYTSSSSP-HTMPL |
| Stepar_2    | IHLYG----FWPFPLDPQ-G---KPVKYHYDYLTKYEYTSSSSP-HTMPL |
| Notcor_2    | IHLYG----FWPFSDHPQ-G---KPVKYHYDYLTKYEYTSSSSP-HTMPL |
| Treber_2    | IHLYG----FWPFSDHPQ-G---KPVKYHYDYLTKYEYTSSSSP-HTMPL |
| Serlaldor_2 | IHLYG----FWPFALDPQ-G---KPVKYHYDYLTKYEYTSSSSP-HTMPL |
| Plaste_2    | IHLYG----FWPFALDPQ-G---KPVKYHYDYLTKYEYTSSSSP-HTMPL |
| Clabat_4    | IHLYG----FWPFKDNS-G---NPVKYHYDYLTKYEYTSSSSP-HTMPL  |
| Ictpun_4A   | IHLYG----FWPFKDS-G---NPVKYHYDYLTKYEYTSSSSP-HTMPL   |
| Panhyp_4    | IHLYG----FWPFKDS-G---NPVKYHYDYLTKYEYTSSSSP-HTMPL   |
| Umbpyg_4    | IHLYG----FWPFPRDAK-G---NAVKYHYDYLTKYEYTSSSSP-HTMPL |
| Esoluc_4    | IHLYG----FWPFPRDAN-G---NVVKYHYDYLTKYEYTSSSSP-HTMPL |
| Plealt_4    | IHLYG----FWPFPRDAN-G---NLVKYHYDYLTKYEYTSSSSP-HTMPL |
| Onckis_4B   | IHLYG----FWPFPRDAN-G---NMVKYHYDYLTKYEYTSSSSP-HTMPL |
| Onckis_4A   | IHLYG----FWPFPRDAN-G---NMVKYHYDYLTKYEYTSSSSP-HTMPL |
| Onctsh_4    | IHLYG----FWPFPRDAN-G---NMVKYHYDYLTKYEYTSSSSP-HTMPL |
| Oncmyk_4    | IHLYG----FWPFPRDAN-G---NMVKYHYDYLTKYEYTSSSSP-HTMPL |
| Corlav_4    | IHLYG----FWPFPRDSN-G---NVVKYHYDYLTKYEYTSSSSP-HTMPL |
| Astmex_4A   | IHLYG----FWPFKDN-G---IPVKYHYDYLTKYEYTSSSSP-HTMPL   |
| Pygnat_4    | IHLYG----FWPFKDA-G---NPVKYHYDYLTKYEYTSSSSP-HTMPL   |
| Aloalo_4    | IHLYG----FWPFKDT-G---NPVKYHYDYLTKYEYTSSSSP-HTMPL   |
| Cluhar_4    | IHLYG----FWPFKDSQ-G---NPVKYHYDYLTKYEYTSSSSP-HTMPL  |
| Denclu_4    | IHLYG----FWPFPRDTQ-G---NPVKYHYDYLTKYEYTSSSSP-HTMPL |
| Konpun4     | IHLYG----FWPFKDSQ-G---NTVKYHYDYLTKYEYTSSSSP-HTMPL  |
| Sarpil_4    | IHLYG----FWPFKDT-G---NPVKYHYDYLTKYEYTSSSSP-HTMPL   |
| Caraur_4    | IHLYG----FWPFPRDGS-G---NPVKYHYDYLTKYEYTSSSSP-HTMPL |
| Cteide_4    | IYLYG----FWPFKDN-G---NPVKYHYDYLTKYEYTSSSSP-HTMPL   |
| Petmar_4    | IHLYG----FWPFQYNIA-G---KPVRYHYDYLTKYEYTSSSSP-HTMPL |
| Cypcar_4    | IHLYG----FWPFKDG-G---NPVKYHYDYLTKYEYTSSSSP-HTMPL   |
| Danrer_4    | IYLYG----FWPFKDS-G---NPVKYHYDYLTKYEYTSSSSP-HTMPL   |
| Misang_4    | IHLYG----FWPFKDG-G---NPVKYHYDYLTKYEYTSSSSP-HTMPL   |
| Angjap_4    | IHLYG-----                                         |
| Cypcar_4A   | IHLYG----FWPFKDG-G---NPVKYHYDYLTKYEYTSSSSP-HTMPL   |
| Angang_4    | IHLYG----FWPFKDLG-G---NPVKYHYDYLTKYEYTSSSSP-HTMPL  |
| Cypcar_4B   | IHLYG----FWPFKDG-G---NPVKYHYDYLTKYEYTSSSSP-HTMPL   |
| Sinans_4A   | IHLYG----FWPFKDG-R---NPVKYHYDYLTKYEYTSSSSP-HTMPL   |
| Sinans_4B   | IYLYG----FWPFKDG-G---NPVKYHYDYLTKYEYTSSSSP-HTMPL   |
| Singra_4A   | IHLYG----FWPFKDG-R---NPVKYHYDYLTKYEYTSSSSP-HTMPL   |
| Aptalb_4    | IHLYG----FWPFKDAE-G---NPVKYHYDYLTKYEYTSSSSP-HTMPL  |
| Eigvir_4    | IHLYG----FWPFKDAE-G---NPVKYHYDYLTKYEYTSSSSP-HTMPL  |
| Eleele_4    | IHLYG----FWPFKDAK-G---NLVKYHYDYLTKYEYTSSSSP-HTMPL  |
| Parhas_4    | IHLYG----FWPFKDAE-G---NPVKYHYDYLTKYEYTSSSSP-HTMPL  |
| ScIfor_4    | IHLYG----FWPFKDSK-G---NAVKYHYDYLTKYEYTSSSSP-HTMPL  |
| Gnapet4     | IHLYG----FWPFKDS-G---NPVKYHYDYLTKYEYTSSSSP-HTMPL   |
| Ostbic_4    | IHLYG----FWPFKDSK-G---NMVKYHYDYLTKYEYTSSSSP-HTMPL  |
| Parkin_4    | IHLYG----FWPFKDS-G---NPVKYHYDYLTKYEYTSSSSP-HTMPL   |
| Panbuc_4    | IHLYG----FWPFKDLQ-G---NPVKYHYDYLTKYEYTSSSSP-HTMPL  |
| Ercal4      | IHLYG----FWPFKDSI-G---KPVKYHYDYLTKYEYTSSSSP-HTMPL  |
| Salsal_4    | IHLYG----FWPFPRDAN-G---NMVKYHYDYLTKYEYTSSSSP-HTMPL |
| Saltru_4    | IHLYG----FWPFPRDAN-G---NMVKYHYDYLTKYEYTSSSSP-HTMPL |
| Salalp_4    | IHLYG----FWPFPRDAN-G---KIVKYHYDYLTKYEYTSSSSP-HTMPL |
| Salfon_4    | IHLYG----FWPFPRDAN-G---KIVKYHYDYLTKYEYTSSSSP-HTMPL |
| Thythy_4    | IHLYG----FWPFPRDAN-G---NVVKYHYDYLTKYEYTSSSSP-HTMPL |
| Calmil_4    | IHLYG----FWPFKDN-G---TPVKYHYDYLTKYEYTSSSSP-HTMPL   |
| Hetzeb_4    | IHLYG----YWPFKDAK-G---TPVKYHYDYLTKYEYTSSSSP-HTMPL  |
| Rhityp_4    | IHLYG----YWPFKDSK-G---VPVKYHYDYLTKYEYTSSSSP-HTMPL  |
| Scytor_4    | IHLYG----YWPFKDSK-G---TPVKYHYDYLTKYEYTSSSSP-HTMPL  |
| Squaca_4    | IHLYG----YWPFKDAK-G---APVKYHYDYLTKYEYTSSSSP-HTMPL  |
| Amical_4    | IHLYG----FWPFKDTK-G---RLVKYHYDYLTKYEYTSSSSP-HTMPL  |
| Lepocu_4    | IHLYG----FWPFKDSQ-G---RPVKYHYDYLTKYEYTSSSSP-HTMPL  |
| Agema_4     | IHLYG----FWPFKDS-G---NPVKYHYDYLTKYEYTSSSSP-HTMPL   |
| Anocar_4    | IHLYG----FWPFPRDIN-G---KTVKYHYDYLTKYEYTSSSSP-HTMPL |

|              |                                                    |
|--------------|----------------------------------------------------|
| Canlupfam_4  | IHLYG----FWPFPKDLN-G---KAVKYHYYDDLKYRYFSNASP-HRMPL |
| Crigri_4     | IHLYG----FWPFPKDLN-G---KAVKYHYYDDLKYRYFSNASP-HRMPL |
| Galgai_4     | IHLYG----FWPFPKDLH-G---KPVKYHYYDDLKYRYFSNASP-HRMPL |
| Mesaur_4     | IHLYG----FWPFPKDLN-G---KAVKYHYYDDLKYRYFSNASP-HRMPL |
| Homsap_4     | IHLYG----FWPFPKDLN-G---KAVKYHYYDDLKYRYFSNASP-HRMPL |
| Notscuscu_4  | IHLYG----FWPFPKDIN-G---KPVKYHYYDDLKYRYFSNASP-HRMPL |
| Psetextex_4  | IHLYG----FWPFPKDIN-G---KPVKYHYYDDLKYRYFSNASP-HRMPL |
| Musmus_4     | IHLYG----FWPFPKDLN-G---KAVKYHYYDDLKYRYFSNASP-HRMPL |
| Pogvit_4     | IHLYG----FWPFPKDMN-G---KPVKYHYYDDLKYRYFSNASP-HRMPL |
| Promuc_4     | IHLYG----FWPFPKDIN-G---KPVKYHYYDDLKYRYFSNASP-HRMPL |
| Pantro_4     | IHLYG----FWPFPKDLN-G---KAVKYHYYDDLKYRYFSNASP-HRMPL |
| Pytbiv_4     | IHLYG----FWPFPKDIN-G---KPVKYHYYDDLKYRYFSNASP-HRMPL |
| Ratnor_2     | IYLYG----FWPFPDQDN-Q---NPVKYHYYDSLKYGYTSQASP-HTMPL |
| Ratnor_4     | IHLYG----FWPFPKDLN-G---KAVKYHYYDDLKYRYFSNASP-HRMPL |
| Siltro_2     | IYLYG----FWPFPDLH-Q---NPVKYHYYDSLKYGYTSQAGP-HAMPL  |
| Siltro_4     | IHLYG----FWPFPKDVY-G---NQVKYHYYDELKYKYFSNAGP-HRMPL |
| Susscr_4     | IHLYG----FWPFPKDLN-G---KAVKYHYYDDLKYRYFSNASP-HRMPL |
| Taegut_4     | IHLYG----FWPFPKDLH-G---KPVKYHYYDDLKYRYFSNASP-HRMPL |
| Termextri_4M | IHLYG----FWPFPKDFY-G---KPVKYHYYDDLKYRYFSNASP-HRMPL |
| Thasirsir_4  | IHLYG----FWPFPKDIN-G---KPVKYHYYDDLKYRYFSNASP-HRMPL |
| Xenlae_4B    | IYLYG----FWPFTKDVY-G---NQVKYHYYDELKYKYFSNAGP-HRMPL |
| Xenlae_4A    | IHLYG----FWPFPKDVH-G---NQVKYHYYDELKYKYFSNAGP-HRMPL |
|              | 251                                                |
| Latcal_3     | EFKLLYKMHTEGLLKLTLSHCA---                          |
| Perflu_3     | EFKLLYKMHTEGLLKLTLSHCA---                          |
| Serdum_3     | EFKLLYKMHTEGLLKLTLSHCA---                          |
| Stepar_3     | EFKLLYKMHTEGLLKLTLSHCA---                          |
| Tetcal_3     | EFKLLFKLHTEGLTKLTLSHCA---                          |
| Monalb_3     | EFKLLYKMHTEGLLKLTLSRCA---                          |
| Molmol_3     | EFKLLYRMHTEGLLKLTLSHCA---                          |
| Takrub_3     | EFKLLYKMHREGLLKLTLSHCA---                          |
| Canlupfam_3  | EFQLLYRMHGEGLTKLTLSHCA---                          |
| Bostau_3     | EFQLLYRMHGEGLTKLTLSHCA---                          |
| Homsap_3     | EFQLLYRMHGEGLTKLTLSHCA---                          |
| Siltro_3     | EFKLLYKMHREGLTKLTLSQCA---                          |
| Anocar_3     | EFQQLFRMHSEGLAKLTLSHCA---                          |
| Musmus_3     | EFQLLYRMHGEGLTKLTLSHCA---                          |
| Pantro_3     | EFQLLYRMHGEGLTKLTLSHCA---                          |
| Ratnor_3     | EFQLLYRMHGEGLTKLTLSHCA---                          |
| Galgai_3     | EFQLLYRMHGEGLAKLTLSRCA---                          |
| Lepocu_3     | EFKLLYKMHTEGLTKLTLSHCA---                          |
| Tetnig_3     | EFKLLYKMHREGLKLTLSHCG---                           |
| Squaca_3     | EFKLLFKLHTDGLTKLTLSHCA---                          |
| Perfla_3     | EFKLLYKMHTEGLLKLTLSHCA---                          |
| Salsal_3     | EFKLLYRMHTEGLIKLTLSHCA---                          |
| Serlaldor_3  | EFRLLYKMHTEGLLKLTLSHCA---                          |
| Treber_3     | EFKLLYKLHREGVIKLSVTHCS---                          |
| Cynsem_3     | EFKLLYKMHTEGLLKLTLSHCA---                          |
| Paroli_3     | EFKLLYKLHREGVTKLSTHCT---                           |
| Paroli_3b    | EFKLLYKMHTEGXLKLTLSHCA---                          |
| Plaste_3     | EFKLLYQLHREGVTKLSTHCA---                           |
| Plaste_3b    | EFKLLYKMHTEGLLKLRLSHCG---                          |
| Erpcal3      | EFKLLYKMHEEGLTKLTLSHCA---                          |
| Calmil_3b    | EFKILFKMHTAGLTKLTLSPCV---                          |
| Hetzeb_3     | EFKLLFKLHTDGLTKLTLSHCA---                          |
| Latcha_3     | EFKLLYKMHGEGLTKLTLSHCA---                          |
| Anates_3     | EFKLLYKMHTEGLLKLTLSHCA---                          |
| Ampcit3      | EFKLLYKMHTEGLLKLTLVSHCA---                         |
| Auslim_3     | EFKLLYKMHTDGLLKLTLSHCA---                          |
| Cypvar_3     | EFKLLYKMHTEGLLKLTLSHCA---                          |
| Krymar_3     | EFKLLYRMHTDGLLKLTLSHCA---                          |
| Funhet_3     | EFKLLYQMHTEGLLKLTLSHCA---                          |
| Gamaff3      | EFKLLYKMHTEGLLKLTLSHCA---                          |
| Orylat_3     | EFKLLHKMHTEGLLKLTLSHCA---                          |
| Orenil_3     | EFKLLYKMHTEGLLKLTLSHCA---                          |
| Mayzeb_3     | EFKLLYKMHTEGLLKLTLSHCA---                          |
| Punnye_3     | EFKLLYKMHTEGLLKLTLSHCA---                          |
| Punnye_3a    | EFKLLYKMHTEGLLKLTLSHCA---                          |
| Neobri_3     | EFKLLYKMHTEGLLKLTLSHCA---                          |
| Misang_3     | EFKLLFKMHTEGLLKLTLSHCT---                          |
| Sinrhi3      | EFKLLFKMHADGVLKLTLSHCT---                          |
| Singra_3     | EFKLLFKMHADGVLKLTLSHCA---                          |
| Hapbur_3     | EFKLLYKMHTEGLLKLTLSHCA---                          |
| Astcal_3     | EFKLLYKMHTEGLLKLTLSHCA---                          |
| Notfur_3     | EFKLLYKMHTDGLVKLTLSHCA---                          |
| Cypcar_3     | -----                                              |
| Poefor3      | EFKLLYKMHTEGLLKLTLSHCA---                          |

|             |                               |
|-------------|-------------------------------|
| Poelat_3    | EFKLLYKMHT EGLLKL SL SHCA---  |
| Poeret_3    | EFKLLHRMHSEGLLKL SL SHCA---   |
| Angang_3    | EFKLLYKMHTDGVIKL SL SHCA---   |
| Xipmac_3    | EFKLLYKMHT EGLLKL SL SHCA---  |
| Masarm_3    | EFKLLYKMHMEGLLKL TL SHCA---   |
| Permag_3    | EFKLLYRMHT EGLLKL SL SHCA---  |
| Gnapet3     | EFKQLYKMHAEGLT KL SL SHCI---  |
| Ostbic_3    | EFKLLYKMHEEGLT KL SL ARCA---  |
| Gadmor_3    | EFKLLYKMHTKGLLKL NL SHCA---   |
| Scifor_3    | EFKLLYKMHEQGLAKL SL ARCA---   |
| Acapol3     | EFKLLYKMHT EGLLKL SL SHCA---  |
| Ampoce_3    | EFKLLYKMHMEGLLKL SL SHCA---   |
| Scifor_3b   | EFKLLHSLHMEGVVQL NL SPCA---   |
| Ostbic_3b   | EFKLLHSLHMEX-----             |
| Parkin_3    | EFKQLYKMHAEGLT KL SL SHCI---  |
| Amppe3      | EFKLLYKMHMEGLLKL SL SHCA---   |
| Oncmyk_3    | EFKLLYKMHT EGLIKL TL SHCA---  |
| Gasacu_3    | EFKLLYKMHTQGLLKL SL SHCA---   |
| Labber_3    | EFKLLYKMHT EGLLKL SL SHCA---  |
| Panbuc_3    | EFKFLYKMHT EGLIRL TL TPCI---  |
| Parhas3     | EFKLLFKMHT EGVL KL SL SHCT--- |
| Cluhar_3    | EFKLLFKMHT EGLLKL TL SHCA---  |
| Aloalo_3    | EFKLLFKMHT EGLLKL TL SHCA---  |
| Panhyp_3    | EFKLLFKMHT EGIL KL SL SHCA--- |
| Eleele_3    | EFKLLFRMHT EGVL KL SL SHCT--- |
| Denclu_3    | EFKLLFKMHT EGLLKL SL SHCA---  |
| Sarpil_3    | EFKLLFKMHT EGLLKL TL THCA---  |
| Eigvir_3    | EFKLLFKMHT EGVL KL SL SHCT--- |
| Aptalb_3    | EFKLLFKMHT EGVL KL SL SHCT--- |
| Sinans_3    | EFKLLFKMHADGVL KL SL SHCA---  |
| Pygnat_3    | EFKLLFKMHT EGVL KL SL SHCT--- |
| Astmex_3    | EFKLLFKMHT EGVL KL SL SHCA--- |
| Caraur_3    | EFKLLFKMHADGVL KL SL SHCA---  |
| Danrer_3    | EFKLLFKMHADGVL KL SL SHCA---  |
| Ictpun_3    | EFKLLFKMHTDGL KL SL SHCA---   |
| Plealt_3    | EFKLLYKMHT EGLLKL TL SHCA---  |
| Plealt_9    | EFKLLYKMHGEGVTRMSL SHCT---    |
| Gasacu_9    | EFKLLYKLHRDGVIKL SL THCS---   |
| Parkin_9    | EFKLLHTLHTEGMVRL SVAPCA---    |
| Acapol_9    | EFKLLYKLHREGVIKL GL THCS---   |
| Larcro_9    | EFKLLYKLHREGVIKL SL THCT---   |
| Notcor_9    | EFKLLYKLHREGVIKL SV THCS---   |
| Latcal_9    | EFKLLYKLHREGVT KL SL THCT---  |
| Serlaldor_9 | EFKLLYKLHREGVT KL SL THCT---  |
| Monalb_9    | EFKLLYKLYKEGVTKL SL THCP---   |
| Serdum_9    | EFKLLYKLHREGVT KL SL THCT---  |
| Perflu_9    | EFKLLYKLHREGVIKL SL THCS---   |
| Perfla_9    | EFKLLYKLHREGVIKL SL THCS---   |
| Stepar_9    | EFKLLYKLHRDGVIKL SL THCS---   |
| Molmol_9    | EFKLLYKLHREGVIKL SL THCA---   |
| Hipcom_9    | EFKLLYRLHRDGVTKL SL THCT---   |
| Takrub_9 B  | EFKLLYKLHREGVIRL SL THCT---   |
| Takrub_9    | EFKLLYKLHREGVIRL SL THCT---   |
| Cynsem_9    | EFKLLYKLHREGVT KL SL THCT---  |
| Scomax_9    | EFKLLYKLHREGVT KL SL THCA---  |
| Corlav_9    | EFKLLYKMHGEGVT KL SL SHCS---  |
| Oncmyk_9    | EFKLLYKMHGEGVT KL SL SHCS---  |
| Salsal_9    | EFKLLYRMHT EGLIKL TL SHCA---  |
| Onctsh_9    | EFKLLYKMHGEGVT KL SL SHCS---  |
| Salalp_9    | EFKLLYKMHGEGVT KL SL SHCS---  |
| Ampoce_9    | EFKLLYKLHREGVIKL GL THCS---   |
| Amppe9      | EFKLLYKLHREGVIKL GL THCS---   |
| Labber_9    | EFKLLYKLHREGVIRL SL THCS---   |
| Umbpyg_3B   | EFKLLYKMHT EGLIKL TL SHCA---  |
| Esoluc_3b   | EFKLLYKMHT EGLIKL TL SHCA---  |
| Gadmor_9    | EFKLLYKMHGEGVT KL SL SHCA---  |
| Umbpyg_9    | EFKLLYKMHAEGVTKL SL SHCS---   |
| Esoluc_9    | EFKLLYKMHGEGVT KL SL SHCS---  |
| Permag_9    | EFKLLYKLHREGAIKL SL THCS---   |
| Bolpec_9    | EFKLLYKLHREGAIKL SL THCS---   |
| Poefor9     | EFKLLYKLHREGVIKL SL THCT---   |
| Masarm_9    | EFKLLYKLHREGVIKL SL THCI---   |
| Angjap_9    | EFKLLYKMHTDGVIKL SL SHCA---   |
| Poelat_9    | EFKLLYKLHREGVIKL SL THCT---   |
| Poeret_9    | EFKLLYKLHREGVIKL SL THCT---   |
| Xipmac_9    | EFKLLYKLHREGVIKL SL THCA---   |
| Hapbur_9    | EFKLLYKLHREGVIKL SL THCS---   |



|             |                            |
|-------------|----------------------------|
| Orylat_9    | EFKLLYKLHREGVTKLGLSHCT---  |
| Gamaff_9    | EFKLLYKLHREGVIKLSLTHCA---  |
| Neobri_9    | EFKLLYKLHREGVIKLSLTHCS---  |
| Funhet_9    | EFKLLYKLHREGVTKLSLTHCT---  |
| Punnye_9    | EFKLLYKLHREGVIKLSLTHCS---  |
| Cypvar_9    | EFKLLYKLHREGVTKLSLTHCT---  |
| Krymar_9    | EFKLLYKLHREGVIKLSLTHCI---  |
| Notfur_9    | EFKLLYKLHREGVTKLSLTHCS---  |
| Notpie_9    | EFKLLYKLHREGVTKLSLTRCS---  |
| Orenil_9    | EFKLLYKLHREGVIKLSLTHCS---  |
| Auslim_9    | EFKLLYKLHREGVTKLSLTHCT---  |
| Anates_9    | EFKLLYKLHREGVTKLSLTHCT---  |
| Astcal_9    | EFKLLYKLHREGVIKLSLTHCS---  |
| Mayzeb_9    | EFKLLYKLHREGVIKLSLTHCS---  |
| Orymel_9    | EFKLLYKLHREGVTKLGLSHCT---  |
| Ampcit9     | EFKLLYKLHREGVIKLSLTHCT---  |
| Macfas_2    | EFKALKSLHEQGALKLTVGQCD---  |
| Macmul_2    | EFKALKSLHEQGALKLTVGQCD---  |
| Macnem_2    | EFKALKSLHEQGALKLTVGQCD---  |
| Musmus_2    | EFKALKSLHEQGALKLTVGQCD---  |
| Ponabe_2    | EFKALKSLHEQGALKLTVGQCD---  |
| Papanu_2    | EFKALKSLHEQGALKLTVGQCD---  |
| Nomleu_2    | EFKALKSLHEQGALKLTVGQCD---  |
| Pantro_2    | EFKALKSLHEQGALKLTVGQCD---  |
| Latcha_2    | EFRTLYGLHQQGALKLTVGECA---  |
| Gnapet2     | EFKTLRALHRQGALCLHTEACS---  |
| Panbuc_2b   | EFQALKVLHERGALQLHTGLCH---  |
| Ostbic_2    | EFETLKALHRQGALRLHTGTCN---  |
| Sinrhi2     | EFRTLSALHRQGALRLHTGPCQ---  |
| Hetzeb_2    | EFKTLRNMHLQGALKLNVGECN---  |
| Hipcom_2    | EFRTLRALHHQGALRLHTGNCH---  |
| Prigla_2    | EFKTLRNMHLQGALKLNVGECN---  |
| Scytor_2    | EFKTLRNMHLQGALKLNVGECN---  |
| Tetcal_2    | EFKTLKNNMHLRGALRLNVGECN--- |
| Rhityp_2    | EFKTLRNMHLQGALKLNIGACR---  |
| Parkin_2b   | EFRTLSRLHALGVLQLHTGSCR---  |
| Angang_2    | EFSTLRDLHSQGALRLHIGRCG---  |
| Pygnat_2    | EFRTLSMLHRKGALRLHTGTCR---  |
| Parkin_2    | EFKTLRALHRQGALCLHTEACS---  |
| Gorgor_2    | EFKALKSLHEQGALKLTVGQCD---  |
| Thegel_2    | EFKALKSLHEQGALKLTVGQCD---  |
| Tupchi_2    | EFKALKSLHEQGALKLTVGQCD---  |
| Galgal_2    | EFKALKTLHQQGALKLTVGECE---  |
| Eleele_2    | EFRTLSTLHSQGALQLHTGTCE---  |
| Danrer_2    | EFRTLSALHRQGALRLHTGPCK---  |
| Canlupfam_2 | EFKALKSLHEQGALKLTVGQCD---  |
| Aloalo_2    | EFRTLSSLHRQGALRLHTSACS---  |
| Astmex_2    | EFRTLSTLHRQGALRLHTETCR---  |
| Sinans_2    | EFRTLSALHRQGALQLHTGPCK---  |
| ScIfor_2    | EFETLRALHRQGALRLHTGACN---  |
| Ceraty_2    | EFKALKSLHEQGALKLTVGQCD---  |
| Anocar_2    | EFKALKALHQQGALKLTVGACD---  |
| Anates_2    | EFRTLSALHRQGALRLHTGQCD---  |
| Ampbic_2    | EFRTLSTLHRQGALRLHTGTCD---  |
| Sarpil_2    | EFRTLSSLHRQGALRLHTSACS---  |
| Xenlae_2    | EFKALKNLHLQGALKLNVGECN---  |
| Cluhar_2    | EFRTLSTLHKQGALRLHTSSCS---  |
| Cypcar_2    | EFRTLSALHRQGALRLHTGPCK---  |
| Denclu_2    | EFRTLALHRQGALRLHTGTCS---   |
| Notpie_2    | EFRTLSSLHRQGALRLHTGTCD---  |
| Erpcal2     | EFQALQRLHQQGALKLNIGDCV---  |
| Amical_2    | EFKTLKNLHSQGALQLHTGPCN---  |
| Lepocu_2    | EFKALKSLHEQGALKLTVGQCD---  |
| Homsap_2    | EFKALKSLHEQGALKLTVGQCD---  |
| Bostau_2    | EFKALKSLHEQGALKLTVGQCD---  |
| Caraur_2    | EFRTLSALHRQGALRLHTGPCK---  |
| Thythy_2B   | EFRTLSSLHRQGALRLHTGSCD---  |
| Onctsh_2B   | EFRTLSSLHRQGALRLHTGSCD---  |
| Salsal_2B   | EFRTLSSLHRQGALRLHTGSCD---  |
| Oncmyk_2B   | EFRTLSSLHRQGALRLHTGSCD---  |
| Onckis_2B   | EFRTLSSLHRQGALRLHTGSCD---  |
| Salsal_2A   | EFRTLSSLHRQGALRLNTGSCD---  |
| Thythy_2A   | EFRTLSSLHRQGALQLNTGSCD---  |
| Salalp_2A   | EFRTLSSLHRQGALRLNTGSCD---  |
| Corlav_2A   | EFRTLSSLHRQGALRLNTGSCD---  |
| Cormar_2A   | EFRTLSSLHRQGALRLNTGSCD---  |
| Onctsh_2A   | EFRTLSSLHRQGALRLNTGSCD---  |

|             |                            |
|-------------|----------------------------|
| Oncmyk_2A   | EFRTLSSLHRQGALRLNTGSCD---  |
| Neobri_2    | EFRTLSTLHRQGALRLHTGVCG---  |
| Takrub_2    | EFRTLSSLHRQGALQLHTGPCD---  |
| Tetnig_2    | EFRTLSTLHRQGALRLHSGPCA---  |
| Orenil_2    | EFRTLSTLHRQGALRLHTGVCG---  |
| Orylat_2    | EFRTLSTLHRQGALRLHTGSCE---  |
| Krymar_2    | EFRTLSSLHRQGALRLHTGICH---  |
| Notfur_2    | EFRTLSSLHRQGALRLHTGTCD---  |
| Poelat_2    | EFRTLSTLHRQGALRLHTGSCD---  |
| Gadmor_2    | EFRTLNTLHRKGALRLHTGTCP---  |
| Xipmac_2    | EFRTLSTLHRQGALRLHTGSCD---  |
| Poeret_2    | EFRTLSTLHRQGALRLHTGSCD---  |
| Astcal_2    | EFRTLSTLHRQGALRLHTGVCG---  |
| Hapbur_2    | EFRTLSTLHRQGALRLHTGVCG---  |
| Acapol_2B   | EFRTLSALHRQGALRLHTGTCD---  |
| Ampoce_2A   | EFRTLSTLHRQGALRLHTGTCD---  |
| Acapol_2A   | EFRTLSALHRQGALRLHTGTCD---  |
| Mayzeb_2    | EFRTLSTLHRQGALRLHTGVCG---  |
| Punnye_2    | EFRTLSTLHRQGALRLHTGVCG---  |
| Latcal_2    | EFRTLSTLHRQGALRLHTGTCD---  |
| Singra_2    | EFRTLSALHRQGALQLHTGPCK---  |
| Auslim_2    | EFRTLSSLHRQGALRLHTGTCD---  |
| Monalb2     | EFRTLSTLHRQGALRLHTGPCD---  |
| Ampoce_2B   | EFRTLSTLHRQGALRLHTGTCD---  |
| Chiham_2    | EFRTLSALHRQGALRLHTGTCD---  |
| Gasacu_2    | EFRTLSALHRQGALRLHTGTGCG--- |
| Gymacu_2    | EFRTLSALHRQGALRLHTGTCD---  |
| Labber_2    | EFRTLSALHRQGALRLHTGSCD---  |
| Cypvar_2    | EFRTLSTLHRQGALRLHTGSCD---  |
| Funhet_2    | EFRTLSTLHRQGALRLHTGHCD---  |
| Larcro_2    | EFRTLSALHRQGALQLHTGSCD---  |
| Paroli_2    | EFRTLNTLHRQGALRLHTGTCE---  |
| Perflu_2    | EFRTLSALHRQGALRLHTGTCD---  |
| Serdum_2    | EFRTLSTLHRQGALRLHTGTCD---  |
| Stepar_2    | EFRTLSTLHRQGALRLHTGTCD---  |
| Notcor_2    | EFRTLSALHRQGALRLHTGTCD---  |
| Treber_2    | EFRTLSALHRQGALRLHTGTCD---  |
| Serlaldor_2 | EFRTLSTLHRQGALRLHTGTCD---  |
| Plaste_2    | EFRTLNALHRQGALRLHTGTCD---  |
| Clabat_4    | EFKTLKMLHSGALKLTTSKCR---   |
| Ictpun_4A   | EFKTLKMLHSGALKLMTSKCT---   |
| Panhyp_4    | EFKTLKMLHSGALKLTTSKCR---   |
| Umbpyg_4    | EFKTLKILHSGALKLTTSKCT---   |
| Esoluc_4    | EFKTLKMLHSGALKLTTSKCA---   |
| Plealt_4    | EFKTLKMLHSGALKLTTSKCI---   |
| Onckis_4B   | EFKTLKMLHSGALKLTTSKCE---   |
| Onckis_4A   | EFKTLKMLHSGALKLTTSKCE---   |
| Onctsh_4    | EFKTLKMLHSGALKLTTSKCE---   |
| Oncmyk_4    | EFKTLKMLHSGALKLTTSKCE---   |
| Corlav_4    | EFKTLKMLHSGALKLTTSKCE---   |
| Astmex_4A   | EFKTLKTLHSGALKLTTSKCR---   |
| Pygnat_4    | EFKTLKMLHSGALKLMTSTCR---   |
| Aloalo_4    | EFKTLKTLHSGALKLTTSKCV---   |
| Cluhar_4    | EFKTLKVLHSGALKLTTSKCM---   |
| Denclu_4    | EFKTLKALHYKGALKLTTSKCT---  |
| Konpun4     | EFKTLKTLHSGALKLTTSKCT---   |
| Sarpil_4    | EFKTLKTLHSGALKLTTSKCV---   |
| Caraur_4    | EFKTLKRLHSGALKLTTSKCT---   |
| Cteide_4    | EFNTLKSILHNKGAMKLTTSKCT--- |
| Petmar_4    | EYRTLHRLHSLGALKLTGKCT---   |
| Cypcar_4    | EFKTLKTLHSGALKLTTSKCT---   |
| Danrer_4    | EFQTLQRLHSGALKLTTSKCT---   |
| Misang_4    | EFRTLRTLHNKGALKLTTSKCE---  |
| Angjap_4    | -----                      |
| Cypcar_4A   | EFKTLKTLHSGALKLTTSKCT---   |
| Angang_4    | EFKTLKTLHSGALKLTTSKCA---   |
| Cypcar_4B   | EFKTLKTLHSGALKLTTSKCT---   |
| Sinans_4A   | EFKTLKTLHSGALKLTTSKCT---   |
| Sinans_4B   | EFKTLKRLHSGALKLTTSKCT---   |
| Singra_4A   | EFKTLKTLHSGALKLTTSKCT---   |
| Aptalb_4    | EFKTLKMLHSGALKLTTSKCT---   |
| Eigvir_4    | EFKTLKMLHSGALKLTTSKCP---   |
| Eleele_4    | EFKTLKMLHSGALKLTTSKCP---   |
| Parhas_4    | EFKTLKMLHSGALKLTTSKCR---   |
| Scifor_4    | EFNTLKMHLHKGALKLTTSKCT---  |
| Gnapet4     | EFKTLKFLHDRGALKLTTSKCT---  |
| Ostbic_4    | EFKTLKMLHSGALKLTTSKCT---   |

|              |                           |
|--------------|---------------------------|
| Parkin_4     | EFKTLKFLHERGALKLTTSKCT--- |
| Panbuc_4     | EFQTLKALHSKGALKLTTSTCT--- |
| Erpcal4      | EFKTLKMLHSKGALKLTTSKCL--- |
| Salsal_4     | EFKTLKMLHSKGALKLTTSKCE--- |
| Saltru_4     | EFKTLKMLHSKGALKLTTSKCE--- |
| Salalp_4     | EFKTLKMLHSKGALKLTTSKCE--- |
| Salfon_4     | EFKTLKMLHSKGALKLTTSKCE--- |
| Thythy_4     | EFKTLKMLHSKGALKLTTSKCE--- |
| Calmil_4     | EFKTLKSLHDRGALKLTTGKCG--- |
| Hetzeb_4     | EFKTLKSLHDRGALKLTTGKCV--- |
| Rhityp_4     | EFKTLKSLHDKGALKLTTGKCV--- |
| Scytot_4     | EFKTLKSLHDKGALKLTTGKCV--- |
| Squaca_4     | EFKTLKSLHDKGALKLTTGKCV--- |
| Amical_4     | EFKTLKTLHNKGALKLTTSTCA--- |
| Lepocu_4     | EFKTLKMLHNKGALKLTTTKCT--- |
| Agema_4      | EFKTLKMLHSKGALKLTTSKCR--- |
| Anocar_4     | EFKTLNMLHNRGALKLTTGKCA--- |
| Canlupfam_4  | EFKTLNVLHNRGALKLTTGKCV--- |
| Crigri_4     | EFKTLNVLHNRGALKLTTGKCM--- |
| Galgai_4     | EFKTLNVLHNRGALKLTTGKCV--- |
| Mesaur_4     | EFKTLNVLHNRGALKLTTGKCM--- |
| Homsap_4     | EFKTLNVLHNRGALKLTTGKCV--- |
| Notscuscu_4  | EFKTLNMLHNKGALKLTTGKCI--- |
| Psetextex_4  | EFKTLNMLHNKGALKLTTGKCI--- |
| Musmus_4     | EFKTLNVLHNRGALKLTTGKCM--- |
| Pogvit_4     | EFKTLNVLHNRGALKLTTGKCV--- |
| Promuc_4     | EFKTLNMLHNRGALKLTTGKCI--- |
| Pantro_4     | EFKTLNVLHNRGALKLTTGKCV--- |
| Pytbiv_4     | EFKTLNMLHNRGALKLTTGKCI--- |
| Ratnor_2     | EFKALKSLHEQGALKLTVGQCD--- |
| Ratnor_4     | EFKTLNVLHNRGALKLTTGKCM--- |
| Siltro_2     | EFKALKNLHLQGALKLNVGECR--- |
| Siltro_4     | EFKTLNMLHNRGALKLTTGKCI--- |
| Susscr_4     | EFKTLNVLHNRGALKLTTGKCV--- |
| Taegut_4     | EFKTLNVLHNRGALKLTTGKCI--- |
| Termextri_4M | EFKTLHMLHNQGALKLTTGKCV--- |
| Thasirsir_4  | EFKTLNMLHNRGALKLTTGKCI--- |
| Xenlae_4B    | EFKTLNMLHNRGALKLTTGKCI--- |
| Xenlae_4A    | EFKTLNMLHNRGALKLTTGTCT--- |

**B) Multiple sequence alignments (ClustalX) of 89 chordate ST8Sia sequences used in figure 2: Minimum Evolution phylogenetic tree of 89 chordates ST8Sia.**

CLUSTAL X (1.81) multiple sequence alignment

```

Angang_3      LQEKSAKWKFNRATAFIQQRK----EISNYIDVAGNFTLTkSSSVRVGQLMH
Lepocu_3      LQEKTSKWKLNKATAFIQQRK----EILRYIDVANNFSLTKNSVVRVGQLMH
Latcha_3      LQEKPSKWI FNRTAFLKQRE----EILQNV DVVKNFSLTKSSSVRVGQLMH
Squaca_3      AHAKPAKWT FNNTSFLQQRK----DISRYVDVFNFTLVKKNVRVGQLLH
Astmex_3      LQENSSKWKFNR TAYLEQSK----EIAQYIDIPHNFTLTkNSVVRVGQLMH
Orylat_3      -LKNSSKW TYNSTAFIQLRT----EISHHIDMPHNFTLTRDAVKVGQLMH
Hetzeb_3      VRGKPVKWT FNNTSFLKQRK----DISRYVDIYKNFTLVKKNVRVGQLLH
Anates_3      -MQNNSKW TYNSTAF TQLRK----EISQHIDIPHNFTLTRDSVRIGQLMH
Acisin_3      LQDKPSKWKFNR TAF LQQRK----EVLHYIDVAKNFTLTkDGIRVGQLMH
Masarm_3      DLQNSSKWRYNSTAFI QQRK----EISQYIDIPHNFTLTRSVRIGQLMH
Calmil_3      FPGKPSKWAFNK TAYLKQRE----DIRHYIDVIQNFTLTkKNVRVGQLMH
Orymel_9      LQGKPYKWKFNRTAFYQQRK----DIFS YIDIPHNFTLTkNSVVRVGQLMH
Anates_9      LQGKPSKWKFNK TAFYQQRK----DIFS YIDIPNNFSLTKNSVVRVGQLMH
Masarm_9      LQGKPPKWKFNK TAFYQQRK----DIFS YIDIPSNFSLTKGSVVRVGQLMH
Orylat_9      LQGKPYKWKFNRTAFYQQRK----DIFS YIDIPNNFSLTKNSVVRVGQLMH
Eptbur_3/9    NLQELKHWSLNPAAVHHQRT----ELASFVDVSAELSLTRSTLLPGQLLH
Letcam_3/9    -----
Anates_2      ARHSPNSWTFNK TSLNLRK----NILRFFDPERDISILKGTLPKGDIIH
Latcha_2      -KPQLVEWKHNRTLSL KIRK----QILKFLDAERDISVLKGTLPKGDVIH
Amical_2      RTISPSEWRFNSSLRSIRK----NILKFLDAEKDISVLKGNLKP GDTIH
Acisin_2      IVPAASEWRFNKDLSISIRK----NILKFLDAERDISVLKGNVQPGDIIH
Angang_2      LATPSSEWSFNRTLSNSIRK----NILKFLDAERDISMLRGS LRPGEVIH
Astmex_2      FTSPASGWIFNR TLSSIIRK----KVLRF LDAERDISILKSTFKPGDIIH
Orylat_2      NNHSLKTWTFNK TSLNLRK----NILQFLDPERDISILKGTLPKGDIIH
Hetzeb_2      RLIDIPEWKFNATLTARIRK----DILKFLDAEKDISVLK GKLGAGDIIH
Lepocu_2      IESPSSDWRFNRSLSNIIRK----SILKFLDAEKDISVLKGNLKP GDTIH
Latcha_4      -QHSAGWKINSSLVLEIRK----DILRFLDAERDVSAVKSNFKPGDVIH
Astmex_4-A    --LQSEDWKVNATLVAMIRK----DILHFLDAEKDVSVIKSNFKPGDIIH
Angang_4      LQHTAQGWHLNSSLVLMIRK----DVLRF LDAERDVSVVKSSSLKPGDIIH
Lepocu_4      FQHSVEGWKVNSSLVIEIRK----DILRFLDAERDVSVVKSSSFKPGDVIH
Amical_4      FQHSVEGWKVNSSLVIEIRK----DILRFLDAERDVSVVKSSSFKPGDVIH
Calmil_4      FKHSVEGWKSNLSLVIKIRK----DILRFLDAERDISVVKSSSLKPGDIIH
Squaca_4      FEHSVKGWKNNASLVVKIRK----DILRFLDAERDISVVKSSSLKPGDIIH
Acisin_4      FQHSVEGWKINSSLVLEIRK----DILRFLDAEKDVSVVKSSSFKPGDVIH
Hetzeb_4      FEHTVEGWKNNASLVVKIRK----DILRFLDAERDISVVKSSSLKPGDIIH
Petmar_4      -----K-----DILKFLDADRDVSI LQAQVQPGDLVH
Letcam_4      DVHLSIGSRCVHL PCCASSK----DVLKFLDADRDVSI LRAQVQPGDLVH
Eptbur_4      VNDVSSSWHFNATLAESIRK----DVLRF LDPERDMFL LQREVKPGVRIP
Latcha_1      VLQQGSEWRRNQTAVALFRC----FRER-----GKDL-
Angang_1      VLRQGQVWKKNQTRIRLFRH----LLKVC CNPRKMFAVTKENSPPGKVIW
Angang_1b     VLQLGQTWKKNETTVHLYRE----LLMDCCDPREKFAVTRGNTPLGTVLW
Astmex_1      -LRQGQTWSKNQ TGIDLYRK----LLTECCDPKKMFAVTKENSPIGKTLW
Orylat_1      -LRQGDVWRKNQ TGIDLYRD----LLTKCCNPKKMFAVTKENSPIGKVLW
Acisin_1      -LRQRKLWKKNQ TGISIRYK----LVEECCDP RNLFVAVTKQNTPLGKNLW
Lepocu_1      -LRQGKAWKNFTGISMFRK----LLRDCCDP RNLFVSVTKQNAPP GKILW
Hetzeb_1      EILHQAKWKRNQTAITAFRR----LLEQCCDAQRF AVTKLNSPMGKSLW
Squaca_1      EILQQAKWKRNQTAIAAFRR----LLEQCCDAQRLFAVTKLNSPMGKSLW
Calmil_1      DVLHQPVWRNQTA TAFRR----LLENCCE TKRMFAV TQHNSPMGKNLW
Petmar_1      -----RQ-----KIEKCCDPLKSFALTQTNSPVGKKIW
Letcam_1      -----
Eptbur_1      AKIKDSLWTHNETALQNFKK----LLAQSCSADQ-LVV TQRTHPSGSMLW
Latcha_5      RRMQVCRWEINETEAKAFKS----YLSRCCNAPSFLFTTQKNTPLG TKLK
Letcam_5      -----
Lepocu_5      RSLQVCKWELNKTEANAFKT----SLSRCCNAPSFLFTTKRNTPSG TKLR
Squaca_5      KTLQLCKWERNKTAANIFKS----HLTRCCNAPAF LFTTQKNTPKGIK LK
Angang_5      RNLQICKWEQSKAETNAFKS----SLSHCCNAPSFLFTTKRNTPSG TKLR
Acisin_5      KSLQACKWQMNKAEANAFKA----SLSRCCNAPAFMFTTQRNTPF GTKLR
Orylat_5      RNLQVCKWEQSK EETS NFKL----SLSRCCNAPSFLFTTKRNTPAGSK LR
Astmex_5      RNLQACMWGQNKEETANFKM----SLSRCCNAPSFLFTTRRNTPSG TKLR
Angang_5b     KSLQMCRW EQNKVEANAFRN----LLSRCCNAPSFLFTTKKNTPSG TKLR
Anates_5      RNLQVCRWEQNK EETS NFKM----SLSRCCNAPSFLFTTKRNTPAGTK LR
Calmil_5      RTLQLCKWELNKTEANTAR-----LTNCCNAIQNF TTVTQVNTALGANLT
Hetzeb_5      RTLQLCKWERNETAANIFKS----HLTRCCNAPVFLFTTQKNTPKGIK LK
Eptbur_5      -----MLQRC CNAPSLLFVTQSNTPI SSTVH
Latcha_6      NELQKCSWVIRPEEHEKFRS----ELSVCCNAVRNFIVSQNNTP LGTNMS
Latmen_6      NELQKCSWVIRPEEHEKFRS----ELSVCCNAVRNFIVSQNNTP LGTNMS

```

|           |                           |                         |
|-----------|---------------------------|-------------------------|
| Squaca_6  | AQLQQCQWHKQELEAEKFRS----  | ELKRCCYAAYDGLVTQRNTPVGT |
| Calmil_6  | AKIHQCKWGKQKRAVENFRW----  | ELRKCCTLSGSFVTQRNTPVGT  |
| Hetzeb_6  | AKLQKCCQWHKQEVAAEELRS---- | ELKRCCHAAYNYLVTQKNMPVG  |
| Lepocu_8  | AQVHSQTWRKQESRLQTFRA----  | QLNMKCGFSRAIITQANTLLGSK |
| Acisin_8  | LQLEAQGWERWEESYQKLRS----  | ALSRDCHGVSDAVITQKNTPLG  |
| Angang_8  | VELYSYAWKKQANFNKFRS----   | QLSSRCRGVSTAIVTQNNTPLD  |
| Orylat_8  | LELYSEPWKQEDNYHQFRS----   | QLNSKCHGLEKAIITQANTPOG  |
| Astmex_8  | LKSYSPRWKRREANFSKFRS----  | LLSSSCHAVSKAVVTQSNTPVG  |
| Amical_8  | LQTHIVDWEKQEHKFQSFRA----  | QLNSRCDGLSKAIIISQTNTPL  |
| Anates_8  | IEQYSHTWKRQEDNYREFRS----  | QLNSRCHGYDKAIIITQANTPL  |
| Lepocu_8b | LQTHIVDWEKQEHKFQSFRA----  | QLNSRCDGLSKAIIISQTNTPL  |
| Lepocu_7  | TKLMSCPWTANPTLQERLRS----  | VLRSCCDAQQNLSTQKNTRLG   |
| Lepocu_7b | TQLMRCPWTNLNLTLQEQQRT---- | ELRLSCNATGRLVVTQDNTPL   |
| Angang_b  | KKIMSCPWTSNLTQQIIHKM----  | DLHTECNASGTLFVTRENTHL   |
| Latcha_7  | NRKRCGELRENLTSQLPKET----  | DLNKCSNLTQRLVLTRENAPIG  |
| Angang_7  | RALMSCPHESNITQRERHRV----  | ELRSCCNATGSLFLTRQNTREG  |
| Eptbur_7  | -----RA-----              | MLRSCCDARTGLVLTRGDAAER  |
| Petmar_7  | -----RA-----              | MLRSCCDARTGLVLTRGDAAER  |
| Lecam_7   | -----                     | MLRSCCDARAGLVLTTRGDAAER |
| Petmar_7b | -----                     | -----                   |
| Lecam_7r  | ISVNKNWKANASKKEAYRSVCVCMK | CTDGSSNIVVTQNNSPLG      |
| Petmar_7r | ISVNKNRWKANASKKETYKT----  | YMKCFTDGSSNIVVTQNNSPLG  |
| Eptbur_7r | ISVNKNRWKANASKKETYKT----  | YMKCFTDGSSNIVVTQNNSPLG  |

|            |                                  |               |             |        |
|------------|----------------------------------|---------------|-------------|--------|
| Angang_3   | YDYSSHKYVFSIGEN----              | LMSLLPES----- | SPIVPE---   | RRFNVC |
| Lepocu_3   | YDYSSHKYVFSISNN----              | FRSLLPDT----- | SPIL-N---   | KQYNVC |
| Latcha_3   | YDYSSHKYVFSISNH----              | FKSLLPDV----- | SPIL-N---   | KCYNIC |
| Squaca_3   | YDYSSHKYVFSVSNS----              | FRSLLPEV----- | PPIL-K---   | MHYNTC |
| Astmex_3   | YDYSSHKYVFSIGEN----              | FRSLLPDS----- | SPVL-N---   | KRYNTC |
| Orylat_3   | FDYSSHKYVFSIGEN----              | FRSLLPEV----- | SPIL-N---   | RHYNVC |
| Hetzeb_3   | YDYSSHKYVFSVSNS----              | FRSLLPDV----- | PPIL-K---   | MHYNTC |
| Anates_3   | YDYSSHKYVFSIGEN----              | FRSLLPDA----- | SPIL-N---   | KHYNVC |
| Acisin_3   | YDYSSHKYVFSISNN----              | FKSLLPDA----- | SPVM-N---   | KHYNVC |
| Masarm_3   | YDYSSHKYVFSIGEN----              | FYSLVPEV----- | SPIL-N---   | KHYNIC |
| Calmil_3   | FDYSSHKYVFSISNN----              | FRMLLPEV----- | SPLL-K---   | MHYNTC |
| Orymel_9   | FDYSSHKYVFSISNN----              | FKSLLPDI----- | SPIL-N---   | KHYSVC |
| Anates_9   | FDYSSHKYVFSISNN----              | FKSLLPDT----- | SPIH-N---   | KHYSVC |
| Masarm_9   | FDYSSHKYVFSISNN----              | FKSLLPDT----- | SPIL-N---   | KHYSVC |
| Orylat_9   | FDYSSHKYVFSISNN----              | FKSLLPEI----- | SPIL-N---   | KHYSVC |
| Eptbur_3/9 | FDYSPKHVYFVSAA----               | LHSLLPIL----- | PPFH-G---   | RHFNSC |
| Lecam_3/9  | -----                            | LPS-----      | -----       | -----  |
| Anates_2   | YVFDRH-STTNISEN----              | LYRLLPVT----- | SPMK-N---   | QHHRRC |
| Latcha_2   | YVFDRD-STMNISQN----              | LYKLLPRV----- | SPLK-N---   | RHFQNC |
| Amical_2   | YIFDRD-STMNISET----              | LYQLIPKV----- | SPMK-Q---   | QHYRKC |
| Acisin_2   | YVFDRD-STMNISEN----              | LYRLLPSS----- | PPLK-K---   | QHFKRC |
| Angang_2   | YIFDRQ-STVNVSES----              | LYRLLPVT----- | SPMK-D---   | RHYQRC |
| Astmex_2   | YVFDRQ-STTNISEN----              | LYRLLPVT----- | SPMK-N---   | QHYERC |
| Orylat_2   | YVFDRH-STTNISEN----              | LYRLLPVT----- | SPMK-N---   | QHHRRC |
| Hetzeb_2   | YIFDRD-RTLNISHS----              | LYELLPRT----- | SPMK-N---   | KHFKQC |
| Lepocu_2   | YIFDRD-STMNVSET----              | LYQLIPKV----- | SPMK-K---   | QHYRQC |
| Latcha_4   | YVLDRR-RTLNISHN----              | LYSLLPEV----- | SPMK-N---   | RRFKTC |
| Astmex_4-A | YILDRR-RTLNVSHT----              | LHSLLPEV----- | SPLK-N---   | KRFKTC |
| Angang_4   | YVLERR-RTLNVSRA----              | LHSLLPV-----  | SPMK-N---   | RRFRTC |
| Lepocu_4   | YVLDRR-RTLNISHN----              | LHSLLPEV----- | SPMK-N---   | RRFKTC |
| Amical_4   | YVLDRR-RTLNISHN----              | LHSLLPEV----- | SPMK-N---   | RRFKTC |
| Calmil_4   | YVLDRR-RTLNISR-----              | LHSLLPEV----- | SPMK-N---   | KRFNAC |
| Squaca_4   | YVLDRR-RTLNISQN----              | LHSLLPEV----- | SPMK-N---   | KRFSTC |
| Acisin_4   | YVLDRR-RTLNISHN----              | LHSLLPEV----- | SPMK-N---   | RRFKTC |
| Hetzeb_4   | YVLDRR-RTLNISHN----              | LHSLLPEV----- | SPMK-N---   | KRFSTC |
| Petmar_4   | YIFDRG-RTTNVSHS----              | LHALLPTA----- | PPLR-G---   | GRYGSC |
| Lecam_4    | YIFDRG-RTTNVSHS----              | LHALLPTA----- | PPLR-G---   | GRYGSC |
| Eptbur_4   | YILNRG-HFATVTRT----              | VHSLLP-----   | PLLH-G---   | RRFATC |
| Latcha_1   | -----                            | TETD-----     | TPFQ-----   | LPLKCC |
| Angang_1   | YDGELY-HSRTVKND----              | TYALFVQE----- | MPLQ-----   | APLKRC |
| Angang_1b  | YDGELF-YFHTVSNH----              | TYPLFVQE----- | SPIK-----   | VPLKCC |
| Astmex_1   | YDGEFY-HYHTVSNE----              | TYPFVQD-----  | TPLQ-----   | LPLKCC |
| Orylat_1   | YDGEIY-HSHTVNSE----              | TYQLFIKR----- | RGAA-----   | SSCRRC |
| Acisin_1   | YDGELF-HSLTVNND----              | TYSLFIKE----- | NPLQ-----   | LPLKRC |
| Lepocu_1   | YDGEFY-YSHTVNND----              | SYSLFIEE----- | TPFQ-----   | QPLKCC |
| Hetzeb_1   | FDGEFL-YSLTVNNE----              | IFSMFPQD----- | TPLQ-----   | LPLKCC |
| Squaca_1   | FDGEFF-YSLAVNNE----              | IFSMFPQD----- | TPFQ-----   | LPLKCC |
| Calmil_1   | FDGEFL-HSLSVNNE----              | MFAMFPQD----- | TPFQ-----   | IPLKCC |
| Petmar_1   | FDGELF-HWITVDNDTFGLFFCLYLQH----- | -----         | QPLG-Q---   | KLLKRC |
| Lecam_1    | -----                            | -----         | -----       | -----  |
| Eptbur_1   | YDGEIF-HWLHVDLP----              | LSQTFPKE----- | NPLKAD----- | GSC    |
| Latcha_5   | YEVDSSTYNINSE----                | IFKMFPKD----- | MPYS-R---   | TQFKKC |
| Lecam_5    | -----                            | -----         | -----       | -----  |

|           |                                                    |
|-----------|----------------------------------------------------|
| Lepocu_5  | YEVDTSGILHISSE----IFKMFPND-----MPYT-R---SQFKRC     |
| Squaca_5  | YEVDTSGILHISSE----VFELFPKE-----MPYS-R---SQFKKC     |
| Angang_5  | YEVDTSGILHISSE----IFKMFPDD-----MPYT-K---SQFKKC     |
| Acisin_5  | YEVDTSGILHINPA----IFKMFPKD-----MPYS-R---SQFKKC     |
| Orylat_5  | YEVDTSGILPITNE----VFKMFPD-----MPYS-K---SQFKKC      |
| Astmex_5  | YEVDTSGILHISPE----IYKMLPED-----MPYS-K---SQFKKC     |
| Angang_5b | YEVDTSGILPITSE----IFKMFPDD-----MPYS-K---SQYKRC     |
| Anates_5  | YEVDTSGILPITTE----VFKMFPDD-----MPYS-K---SQYKRC     |
| Calmil_5  | YDAQPK-KQITITED----IFNLFPQE-----MPYS-R---SQFKKC    |
| Hetzeb_5  | YEVDTSGILFIDAE----VFQFPKE-----MPYS-R---SQFKKC      |
| Eptbur_5  | YEQEPV-KNVPIESS----IYYMLPKS-----MPYQ-R---QQLARC    |
| Latcha_6  | YEVENG-RTFLITQR----IFKMFPQS-----QPFA-G---YPYNQC    |
| Latmen_6  | YEVENG-RTFLITQR----IFKMFPQS-----QPFA-G---YPYNQC    |
| Squaca_6  | YDAEPK-KKIKITHP----IFTIFPKD-----SAFS-S---RQYRRC    |
| Calmil_6  | YDAEPK-KKIKITPS----IFAIFPKD-----SPFR-G---RSIQRC    |
| Hetzeb_6  | YDAESK-NKINITPQ----IFSIFPKN-----SFFS-G---RQYRRC    |
| Lepocu_8  | YDGERR-KPVEVTPK----LYSTFPKE-----HPFG-N---VSFQSC    |
| Acisin_8  | YDGEKR-RHIKINQK----IFSTFPSE-----TPFV-N---VTFASC    |
| Angang_8  | YDGEKR-KPLQVTPK----LYSTFAKE-----QPFE-N---VTWKTC    |
| Orylat_8  | YDAERK-RTLNVNAE----VFNTFIKE-----NPPF-N---KTWDTC    |
| Astmex_8  | YDGEKT-KPLQVTKA----LFSTFAKE-----QPFG-N---ASWDTC    |
| Amical_8  | YDGEKR-KPIQVTPK----LFSTFPKE-----HPFG-N---RTFTSC    |
| Anates_8  | YDGEKR-KSLQVSPK----LFSTFAKE-----DPFS-N---KTLDTC    |
| Lepocu_8b | YDGEKR-KPIQVTPK----LFSTFPKE-----HPFG-N---RTFTSC    |
| Lepocu_7  | YEVNRT-IWRQVDQE----LFEMLPQS-----SLFR-----AGLSRC    |
| Lepocu_7b | YDAEK--WTRQVDTE----IFNMLPQS-----PPWA-GGPGARLRRC    |
| Angang_b  | YEVQKR-STKVVDKM----LYNMLPRA-----APWGIS---RVLGRC    |
| Latcha_7  | YEVAE--QRVRVEEP----LFKLLPRF-PPPFYQESPFK-K---APYKRC |
| Angang_7  | YETNRK-KNILVDKS----IFKMLPKS-----TPWRND---SRFQRC    |
| Eptbur_7  | FEAAT--KTLHVTQP----LLSVLPES-----SPLA-G---ELHGRC    |
| Petmar_7  | FEAAT--KTLHVTQP----LLSVLPES-----SPLA-G---ELHGRC    |
| Letcam_7  | FEAAA--KTLHVTQP----LLSVLPEVWPTQVCQSSPLA-G---ELHGRC |
| Petmar_7b | -----PLA-G---ELHGRC                                |
| Letcam_7r | YLIGN--AQLTVGTE----LTNIIPMT-----FPGP-E---MKMKTC    |
| Petmar_7r | YVIGN--AQLTVGTE----LTNIIPMT-----FPGP-E---MKMKTC    |
| Eptbur_7r | YVIGN--AQLTVGTE----LTNIIPMT-----FPGP-E---MKMKTC    |

|            |                                                  |
|------------|--------------------------------------------------|
| Angang_3   | ALVGNISGVLTSRCGPEIDRSDFVFR-----CNFAPTE-IFHRDVGR  |
| Lepocu_3   | AVVGNISGILTSQCQPEIDKSDFVFR-----CNFAPTE-IFHKDVGR  |
| Latcha_3   | AVVGNISGILTDSCQGAIEDQSDFVFR-----CNFAPTE-IFHKDVGR |
| Squaca_3   | AVVGNISGILTSQCGAEIDKSDFVFR-----CNFAPTE-TFEKDVGR  |
| Astmex_3   | AVVGNISGILTSRCGPTIDKYDFVFR-----CNFAPTE-VFRRDVGR  |
| Orylat_3   | AVVGNISGILTSLCGAQIEKYDFVFR-----CNFAPTE-IFKKDVGR  |
| Hetzeb_3   | AVVGNISGILTSRCGADIDKSDFVFR-----CNFAPTE-SFEKDVGR  |
| Anates_3   | AVVGNISGILTSRCGPQIEKFDFVFR-----CNFAPTE-IFKKDVGR  |
| Acisin_3   | AVVGNISGILTSKCGSEIDKADFVFR-----CNFAPTE-VFQKDVGR  |
| Masarm_3   | AIIGNSGILSGSRCSQIEKFDFVFR-----CNFAPTE-IFKKDVGR   |
| Calmil_3   | AVVGNISGILTSRCGDSIDKSDFVFR-----CNFAPTE-FFEKDVGR  |
| Orymel_9   | AVVGNISGILTSCHGPEIDQADFVFR-----CNFAPTD-VYSKDVGR  |
| Anates_9   | AVVGNISGILTSCHGPEIDQADFVFR-----CNFAPTD-VYSKDVGR  |
| Masarm_9   | AVVGNISGILTSCHGPEIDQADFVFR-----CNFAPTE-VYSKDVGR  |
| Orylat_9   | AVVGNISGILTSCHGPEIDQADFVFR-----CNFAPTD-VYSKDVGR  |
| Eptbur_3/9 | AVVGNISGVLTSQCGQRIDTADFVIR-----CNFAPTT-GYVHDVGN  |
| Letcam_3/9 | -----C-----                                      |
| Anates_2   | AIVGNISGILLNSSCGHEIDSHDFVIR-----CNLAPVE-EYSRDVGR |
| Latcha_2   | AIVGNISGILLNSCGREIDDHQFVIR-----CNLAPVQ-EYASDVGT  |
| Amical_2   | AIVGNISGILLNSRCGEEIDSHDFVIR-----CNLAPVE-EYADDVGL |
| Acisin_2   | AIVGNISGILLNSGCGAEIDSHDFVIR-----CNLAPVE-EYSRDVGL |
| Angang_2   | AIVGNISGILLNSSCGRQIDSHDFVIR-----CNLAPVE-EYAADVGL |
| Astmex_2   | AIVGNISGILLNSCGPEIDSHDFVIR-----CNLAPVE-EYAEDVGL  |
| Orylat_2   | AIVGNISGILLNSCGSEIDAHDFVIR-----CNLAPVD-EYSQDVGR  |
| Hetzeb_2   | AIVGNISGILLNSGCGQEIDAHEFVIR-----CNLAPVE-EYAHDVGL |
| Lepocu_2   | AIVGNISGILLNSRCGAEIDSHDFVIR-----CNLAPVE-EYRADVGR |
| Latcha_4   | AIVGNISGILLGSSCGKEIDSHEFVIR-----CNLAPLV-EFAEDVGI |
| Astmex_4-A | AVVGNISGVLLKSGCGKEIDGHDFVIR-----CNLAPLA-EFAEDVGL |
| Angang_4   | AVVGNISGVLLNSGCGREIDGHDFVIR-----CNLAPLE-EFAEDVGL |
| Lepocu_4   | AVVGNISGILLNSGCGKEIDNHDFVIR-----CNLAPLA-EFSEDVGL |
| Amical_4   | AVVGNISGILLNSGCGREIDSHDFVIR-----CNLAPLA-EFSEDVGL |
| Calmil_4   | AVVGNISGILLGSGCGKEIDSHEFVIR-----CNLAPLV-EYTDVGS  |
| Squaca_4   | AVVGNISGILLGSGCGKEIDSHEFVIR-----CNLAPLV-EYADDVGL |
| Acisin_4   | AVVGNISGILLDSGCGNEIDSHDFVIR-----CNLAPLS-EFAEDVGM |
| Hetzeb_4   | AVVGNISGILLGSGCGKEIDSHEFVIR-----CNLAPLM-EYTDVGL  |
| Petmar_4   | AVVGNISGILEGSACGEEIDQHDFVIR-----CNLAPVE-GYERDVGS |
| Letcam_4   | AVVGNISGILEGSACGEEIDQHDFVIR-----CNLAPVE-GYERDVGS |
| Eptbur_4   | ALVGNISGILRSGHCGSEIDRHDIYR-----CNMAPVT-PFKRDVGI  |
| Latcha_1   | SVVGNISGILLKSGCGRQIDNADFVIR-----CNLPPLSNEYRNDAGS |
| Angang_1   | AVVGNISGVLLKSGCGRQIDGADFVIR-----CNLPPLSKEYTEDVGT |

|            |                                                     |
|------------|-----------------------------------------------------|
| Angang_1b  | AVVGNNGGILKSGCGGHIDRADFVMR-----CNLPPLSEDTQDVGS      |
| Astmex_1   | SVVGNNGVLKNSGCGKIDQADFVMR-----CNLPPLSKKYTDDVGT      |
| Orylat_1   | AVVGNNGGILKSGKKGKEIDHHHYIFR-----CNLPPLSREYVEDVGT    |
| Acisin_1   | SVVGNNGGILKNSGCGKHIDQTDIFMR-----CNLPPLSKQYTEDVGT    |
| Lepocu_1   | SVVGNNGGILKHSKCGKEIDRADFIMR-----CNLPPLSEDTYREDVGT   |
| Hetzeb_1   | SVVGNNGGILKESGCGSQIDKVDVFMR-----CNLPPLSNEYTKDAGY    |
| Squaca_1   | SVVGNNGGILKKSNCGSQIDKADFVMR-----CNLPPLSNEYTKDAGY    |
| Calmil_1   | SVVGNNGGILKRSACGDKIDKADFVMR-----CNLPPLSNEYARDVGH    |
| Petmar_1   | AIVGNSAIMLGHCCKGKIDDEADVIFRVICFCPLRCNLPPITKQYEPDIGT |
| Letcam_1   | -----DLIVS-----                                     |
| Eptbur_1   | ALVGNNGGILKDSGCGNEIDSVDFIIR-----CNLPPLGEKYSTDVGT    |
| Latcha_5   | AVIGNNGGILKSSGCGREIDSMDFVFR-----CNLPPISEKYVLDVGF    |
| Letcam_5   | -----                                               |
| Lepocu_5   | AVIGNNGGIKNSKCGKEIDSADFVFR-----CNIPPISEKYAVDVGY     |
| Squaca_5   | AVVGNNGGILKNSKCGNEIDATDFVFR-----CNLPPISEKYTMDVGL    |
| Angang_5   | AVIGNNGGIKNSKCGKEIDSADFVFR-----CNIPPIISKYAEDVGY     |
| Acisin_5   | AVIGNNGGILKNSKCGKAIDSADFVFR-----CNLPPISEEYAADVGY    |
| Orylat_5   | AVIGNNGGIKNSKCGKEIDSADFVFR-----CNIPPIKEYSTDVGS      |
| Astmex_5   | AVVGNNGGILKNSKCGKEIDSADFVFR-----CNIPPIISKYAADVGT    |
| Angang_5b  | AVIGNNGGIKNSKCGKEIDSADFVFR-----CNIPPISEKYAVDVGY     |
| Anates_5   | AVIGNNGGILKNSKCGKEIDSADFVFR-----CNIPPISEKYADVGT     |
| Calmil_5   | AVVGNNGGILKSECGKEINSADFVFS-----CNLPPLSNEYARDVGH     |
| Hetzeb_5   | AVVGNNGGILKNSRCGNEIDSAADFVFR-----CNLPPISEKYTMDVGL   |
| Eptbur_5   | AVVGNNGGILHNSRCGSEIDAMEFVFR-----CNLPVSAEFAKDVGS     |
| Latcha_6   | AVVGNNGGILKNSACGTEIDQADFVFR-----CNLPPLTGNISIDVGS    |
| Latmen_6   | AVVGNNGGILKNSACGTEIDQADFVFR-----CNLPPLTGNISIDVGS    |
| Squaca_6   | AVIGNNGGILANSSCGAEIDQADFVFR-----CNLPVGGDFAQDVGT     |
| Calmil_6   | AVVGNAGILHNSSCGAEIDQADFVFR-----CNLPPMGGNFTKDVGS     |
| Hetzeb_6   | AVIGNNGGILANSSCGAEIDQADFVFR-----CNLPPMGGEFTRDIGT    |
| Lepocu_8   | AVVGNNGGILANSSCGEEIDGAQFVIR-----CNLPVDRKYQDDVGN     |
| Acisin_8   | AVVGNNGGILLDSDCGEEIDRADFIIR-----CNLPVKGGRYHSDVGN    |
| Angang_8   | AVVGNNGGILVNSSCGAEIDSAHFVFR-----CNLPPLDKAYQKDVGN    |
| Orylat_8   | AVVGNNGGILANSSCGKTIDSAQFVIR-----CNLPPLSNGFEKDVGI    |
| Astmex_8   | AVVGNNGGILVNSSCAEKINSANLVIR-----CNLPPLNGYEKDVGN     |
| Amical_8   | AVVGNNGGILMNSSCGGEIDEAQFVIR-----CNLPVVDHGYQRDVGN    |
| Anates_8   | AVIGNNGGILTNSSCGNMIDSAQFVIR-----CNLPPLDNGYEKHVGI    |
| Lepocu_8b  | AVVGNNGGILMNSSCGGEIDEAQFVIR-----CNLPVVDHGYQRDVGN    |
| Lepocu_7   | AVVGNNGGILKNSNCGAEIDRADYIIR-----INLPPLA-QSAADVGL    |
| Lepocu_7b  | AVVGNNGGILRNSSCGAHIADRADFVIR-----FNLPL--NYSRDVGV    |
| Angang_b   | AVVGNNGGILKNSSCGEEKINSADFVIR-----LNLPPM--NYSRDVGV   |
| Latcha_7   | AVVGNAGILLNSGCGRRIDQADFVFR-----CNLPPL--NYSKDVGS     |
| Angang_7   | AVVGNNGGILRNSSCGAEIDSADIVFR-----LNMAPI--NNSRDVGV    |
| Eptbur_7   | AVVGNNGALLGSRGCRSIDNADFVIR-----VQPPSGVGKLG-AGR      |
| Petmar_7   | AVVGNNGALLGSRGCRSIDNADFVIR-----VQPPSGVGKLG-AGR      |
| Letcam_7   | AVVGNNGALLGSRGCRSIDNADFVIR-----RCNLPPVSGNFTRDVGN    |
| Petmar_7b  | AVVGNNGALLGSRGCRSIDNADFVIR-----RCNLPPVSGNFTRDVGN    |
| Letcam_7r  | AVVGNNGGFLNLSKCGKEIDKSDFIMR-----CNLPNISKKYSDMVGE    |
| Petmar_7r  | AVVGNNGGFLNLSKCGKEIDKSDFIMR-----CNLPNISKKYSDMVGE    |
| Eptbur_7r  | AVVGNNGGFLNLSKCGKEIDKSDFIMR-----CNLPNISKKYSDMVGE    |
|            |                                                     |
| Angang_3   | RTN--LTTFNPSILEK--YNNLLTIQDRNNFFLSLKKLD-GVVLWIPAF   |
| Lepocu_3   | KTN--LTTFNPSILEK--YNNLLTIQDRNNFFLSLKKLD-GAILWIPAF   |
| Latcha_3   | KTN--LTTFNPSILEK--YNNLLTIQDRNNFFLSLKKLD-GAILWIPAF   |
| Squaca_3   | KTN--LTTFNPSILEK--YNNLLTIQDRNNFFLSLKKLD-GAILWIPAF   |
| Astmex_3   | RTN--LTTFNPSILEK--YNNLLTIQDRNNFFLSLKKLD-RAVLWIPAF   |
| Orylat_3   | RTN--LTTFNPSILEK--YNNLLTVQDRNNFFLSLKKLD-GAILWIPAF   |
| Hetzeb_3   | KTN--LTTFNPSILEK--YNNLLTIQDRNNFFLSLKKLD-GAILWIPAF   |
| Anates_3   | RTN--LTTFNPSILEK--YNNLLTVQDRNNFFLSLKKLD-GAILWIPAF   |
| Acisin_3   | KTN--LTTFNPSILEK--YNNLLTIQDRNNFFLSLKKLD-GAILWIPAF   |
| Masarm_3   | RTN--MTTFNPSILEK--YNNLLTVQDRNNFFLSLKKLD-GAILWIPAF   |
| Calmil_3   | KTN--LTTFNPSILEK--YNNLMAIQDRNNFFLSLKKLD-GAILWIPAF   |
| Orymel_9   | KTN--MTTFNPSILER--YNNLLTIQDRNNFFLHLKKLE-GAILWIPAF   |
| Anates_9   | KTN--LTTFNPSILER--YNNLLTIQDRNNFFLHLKKLE-GAILWIPAF   |
| Masarm_9   | KTN--LTTFNPSILER--YNNLLTIQDRNNFFLHLKKLE-GAILWIPAF   |
| Orylat_9   | KTN--MTTFNPSILER--YNNLLTIQDRNNFFLHLKKLE-GAILWIPAF   |
| Eptbur_3/9 | RTS--LTTFNPSIIDG--RYGGLLTANDRERFLNRLQELD-GAVLWIPAF  |
| Letcam_3/9 | -----                                               |
| Anates_2   | QTN--LVTMNPSVVQR--AFQDLVSEEWRAFRLRLQSLG-GSVLWIPAF   |
| Latcha_2   | KTD--FVTMNPSVIQR--AFEDLVNETWKEKFLQRLQSLN-GSIFWIPAF  |
| Amical_2   | RTS--LVTMNPSVVQR--AFQDLVSESWRERFLQRLQSLN-GSVLWIPAF  |
| Acisin_2   | RTG--LVTMNPSVVQR--AFEDLVSEAWREKLLQRLRGLS-GSVLWIPAF  |
| Angang_2   | RTS--LVTMNPSVVER--AFRDLSSSEAWRERFVRRLRALE-GSVLWIPAF |
| Astmex_2   | RSS--LVTMNPSVVQR--AFQDLSSKEWRQRFVRRLQALS-GSVLWIPAF  |
| Orylat_2   | QTN--LVTMNPSVVQR--AFQDLVSEEWKQRFQRLQSLG-GSVLWIPAF   |
| Hetzeb_2   | KTD--LVTMNPSVVQR--AFEDLKNETWKEKLLHRLKMLD-GGILWIPAF  |
| Lepocu_2   | RTS--LVTMNPSVVQR--AFQDLASSHWREERFLERLSSLN-GSVLWIPAF |
| Latcha_4   | ESD--FITMNPSVIQR--AFGGFHNETDREKFVYRLAMLN-DSVLWIPAF  |

Astmex\_4-A KSD--FTTMNPSVIQR--VYGGRLNETQRERFVERLSMLN-DSVLWIPAF  
 Angang\_4 RSD--FTTMNPSVIQR--AYGGRLNDSRERFVRRLGALN-DSVLWIPAF  
 Lepocu\_4 RSD--FITMNPSVIQR--AFGGFKNETDRERFVQRLTLN-DSVLWIPAF  
 Amical\_4 RSD--FITMNPSVIQR--AFGGFKNETDREKFVRRLTMLN-DSVLWIPAF  
 Calmil\_4 KSD--FVTMNPSVVQR--AFGSLQNETDRENFVRRLAVLN-DSVLWIPAF  
 Squaca\_4 KSD--FVTMNPSVVQR--AFGSLQSETDREKFVDRDLAVLN-DSVLWIPAF  
 Acisin\_4 SSD--FITMNPSVIQR--VYGGFKNESDREKFVQRLAMLN-SSVLWIPAF  
 Hetzeb\_4 KSD--FVTMNPSVVQR--AFGSLRSETDREKFVDRDLAVLN-DSVLWIPAF  
 Petmar\_4 RVD--FVTMNPSVVER--TYGGLRTKADHDFGRRLRALN-SSILWIPAF  
 Letcam\_4 RVD--FVTMNPSVVER--TYGGLRTQADHDFGRRLRALN-GSVLWIPAF  
 Eptbur\_4 RTD--FLTMMNPSILPR--YGGGLRNATLDRDFVARLRALG-KGIFWIPAF  
 Latcha\_1 KSH--LVTANPSIIEK--RFQNL--WSRKA FVDSVQVYN-HSYIYMPAF  
 Angang\_1 RTH--LVTANPSIIEK--RFHNLL--WSRKA FVDSMKAYG-PSYVYMPAF  
 Angang\_1b RTH--LVTANPSIIEK--RFQGLM--WSRKA FVESMRAYG-RSFVYMPAF  
 Astmex\_1 RTQ--LVTANPSIIEK--SFQNL--WSRKA FVESMKAYG-SSYIYMPAF  
 Orylat\_1 KTH--LVTANPSIIEK--RFQNLV--WSRKT FVDSMKVYG-SSYIYMPAF  
 Acisin\_1 KAH--LVTANPSIIEK--RFQNL--WSRRA FVEYVKAYD-SSFIYMPAF  
 Lepocu\_1 KTH--LVTANPSIIEK--RFQNL--WSRKK FVESVKVYG-SSYIYMPAF  
 Hetzeb\_1 RTH--LVTANPSIIEK--RFQNL--WSRKS FVESMKVYG-SSYIYMPAF  
 Squaca\_1 RTH--LVTANPSIIEK--RFQNL--WSRKS FVESMKVYG-RSYVYMPAF  
 Calmil\_1 RTQ--LVTANPSIIEK--RYQNL--WSRKA FVESMKVYG-RSYIYMPAF  
 Petmar\_1 KTH--LVTANPSIIEK--RYQNL--WSRRA FSESMLAYG-HSFVYMPAF  
 Letcam\_1 -----RYQNL--WSRRA FSESMLAYG-HSFVYMPAF  
 Eptbur\_1 KTS--LVTANPSIIEK--RFSNFI--PSSH SFLDAISAYG-SAQILFPF  
 Latcha\_5 KTD--IVTINPSIIEK--RFQKLE--KWRP PFYALQAYE-NASVVLPAF  
 Letcam\_5 -----PFAEALVYVY-NASVVLPAF  
 Lepocu\_5 KTG--IVTINPSIIEK--RFQKLE--KWRP PFYEVQLQAYE-NASIVLPAF  
 Squaca\_5 KTD--IVTINPSIIEK--RFQKLE--KWRP PFYEVQLQAYE-NASVVMPPAF  
 Angang\_5 KTD--IVTINPSIIEK--RFQKLE--KWRP PFYEVQLQAYE-NSSVVLPAF  
 Acisin\_5 KTD--IVTINPSIIEK--RFQKLE--KWRP PFYEVQLQAYE-NSSVVLPAF  
 Orylat\_5 KTD--IVTINPSIIEK--RFQKLE--KWRP PFYEVQLQAYE-NSSVVLPAF  
 Astmex\_5 KTD--LVTINPSIIEK--RFQKLE--KWRP PFYEVQLQAYE-NSSVVLPAF  
 Angang\_5b KTN--MVTNPSIIEK--RFQKLE--KWRP PFYEVQLQAYE-NSSVVLPAF  
 Anates\_5 KTD--LVTINPSIIEK--RFQKLE--KWRP PFYEVQLQAYE-NSSVVLPAF  
 Calmil\_5 RTQ--LVTANPSIIEK--RFQKLE--KWRP PFYEVQLQAYE-NSSVVMPPAF  
 Hetzeb\_5 KTD--IVTINPSIIEK--RFQKLE--KWRP PFYEVQLQAYE-NASVVMPPAF  
 Eptbur\_5 KTD--IVTINPSIIEK--RYDSLM--QRHGF LARIRSYG-NASLLLPAF  
 Latcha\_6 KTS--LVTNPSIIEK--RFQKLE--EKRK PFVETVSHYG-EAFLLLPAF  
 Latmen\_6 KTS--LVTNPSIIEK--RFQKLE--EKRK PFVETVSHYG-EAFLLLPAF  
 Squaca\_6 KTN--LVTANPSIIEK--RYAELH--DRRKP FFTNLTVYN-EALLLLPAF  
 Calmil\_6 KTH--LVTANPSIIEK--RYAELH--KRRKP FANTLVIYN-DALLLPF  
 Hetzeb\_6 KTN--LVTANPSIIEK--RYAKLQ--DRR SFFTNLAVYD-EALLLLPAF  
 Lepocu\_8 KTD--LVTANPSIIEK--RFEGLM--ELRRP FVESLGDYG-QPMLALPAF  
 Acisin\_8 KTD--LVTANPSIIEK--KFAALS--EWRP PFADCVSRYGAGAMLPAF  
 Angang\_8 KTN--LVTANPSIIEK--KFEGLM--EYRRP FVESLSDYG-EALLLLPAF  
 Orylat\_8 KSD--IVTANPSIIEK--KYFSLM--RRRPF FAEAMRIY-NSMVLLPAF  
 Astmex\_8 KTS--LVTANPSIIEK--KFSGLM--ERRRPF FVESLRPYG-DSLLLPAF  
 Amical\_8 KTS--LVTANPSIIEK--KFNGLM--ELRRP FVDSLGSYG-DPLLVLPF  
 Anates\_8 KTD--LVTANPSIIEK--KFNGLM--ELRRP FVDSLGSYG-DPLLVLPF  
 Lepocu\_8b KTS--LVSANPSQINN--VYRRLS--YERRP FVDTVSSFG-LAPLLLPAF  
 Lepocu\_7b KSS--LVTINPSQITQ--SFMGLC--NARKP FVDKAAAHG-NAYLAMAPF  
 Angang\_b KTD--LVTANPSIIEK--KYHGLK--ESRRL FVERMKVYK-DALILMAAF  
 Latcha\_7 KTS--LVTINPSQIRV--GYPDLQ--KRPQ PLVERVSAYG-DAPLLMPAF  
 Angang\_7 RQPQPHGDAQPHH-Q---YGGHSSSRSRFVSDVTDYG-DALLLVPAL  
 Eptbur\_7 RQPQPHGDAQPHH-QD---GGLHSSSRSRFVSDVTDYG-DALLLVPAL  
 Petmar\_7 RSH--MVTNPSIIEK--YGGHSSSRSRFVSDVTDYG-DALLLVPAL  
 Letcam\_7 RSH--MVTNPSIIEK--YGGHSSSRSRFVSDVTDYG-DALLLVPAL  
 Petmar\_7b KTN--LVFVKPSLIVN--KYSGLR--DSRIKF VEDMQYGSDFLF-TAFN  
 Letcam\_7r KTN--LVFVKPSLIVN--KYSGLR--DSRIKF VEDMQYGSDFLF-TAFN  
 Petmar\_7r KTN--LVFVKPSLIVN--KYSGLR--DSRIKF VEDMQYGSDFLF-TAFN  
 Eptbur\_7r KTN--LVFVKPSLIVN--KYSGLR--DSRIKF VEDMQYGSDFLF-TAFN

Angang\_3 FFHTSATVTRT-LVDDFFVEHKG-QLKVQLAWPGNIMQYVNR YWKTQQLSP  
 Lepocu\_3 FFHTSATVTRT-LVDDFFVEHKG-QLKVQLAWPGNIMQYVNR YWKTQQLSP  
 Latcha\_3 FFHTSATVTRT-LVDDFFVEHKG-QLKLQLAWPGNIMQYVNR YWKTQQLSP  
 Squaca\_3 FFHTSATVTRT-LVDDFFVEHKG-QLKLQLAWPGNIMQYVNR YWKTQQLSP  
 Astmex\_3 FFHTSATVTRT-LVDDFFVEHKG-QLRVQLAWPGNIMQYVNR YWKTQQLSP  
 Orylat\_3 FFHTSATVTRT-LVDDFFVEHKG-QLKVQLAWPGNIMQYVNR YWKTQQLSP  
 Hetzeb\_3 FFHTSATVTRT-LVDDFFVEHKG-QLKVQLAWPGNIMQYVNR YWKTQQLSP  
 Anates\_3 FFHTSATVTRT-LVDDFFVEHKG-QLNVQLAWPGNIMQYVNR YWKTQQLSP  
 Acisin\_3 FFHTSATVTRT-LVDDFFVEHKG-QLKVQLAWPGNIMQYVNR YWKTQQLSP  
 Masarm\_3 FFHTSATVTRT-LVDDFFVEHKG-QLKVQLAWPGNIMQYVNR YWKTQQLSP  
 Calmil\_3 FFHTSATVTRT-LVDDFFVEHKG-QLKVQLAWPGNIMQYVNR YWKTQQLSP  
 Orymel\_9 FLHTSATVTRT-LVDDFFVEHKG-QLKVQLAWPGNIMQYVNR YWKTQQLSP  
 Anates\_9 FLHTSATVTRT-LVDDFFVEHKG-QLKVQLAWPGNIMQYVNR YWKTQQLSP  
 Masarm\_9 FLHTSATVTRT-LVDDFFVEHKG-QLKVQLAWPGNIMQYVNR YWKTQQLSP



|            |                                                     |
|------------|-----------------------------------------------------|
| Orylat_9   | FLHTSATVTRT-LVDDFFVEHKG-QLKVELAWPGNIMHNVNKYWKTKNLSP |
| Eptbur_3/9 | LFHTSAVITRT-LVDDFFLENKS-RLGVQLAWPGPLVGHITRFWRTRALAP |
| Letcam_3/9 | -----P-----RFWRTKGLSP                               |
| Anates_2   | MAKGGEERVEW-ALRLILLHTV-DVRTAFPSL-RLHHAVERGYWLTNNVHI |
| Latcha_2   | MAKGGEERVEW-VNDLIKSGI-NVQTAYPSL-RLHHAVERGYWLTNKVLI  |
| Amical_2   | MAKGGEERVEW-ANDLIKHHI-NVRTAFPSL-RLHHAVERGYWLTNKVPI  |
| Acisin_2   | MSKGGEDRVEC-VNDLILKHHI-DVQTAFPSL-RLHHAVERGYWLTNKVLI |
| Angang_2   | MAKGGEDRVEC-ATRLILRHAI-NVRTAFPSL-RLHHAVERGYWLTNKVLI |
| Astmex_2   | MAKSGEDRVEC-AVHLILSHTV-SVHAAPPSL-RLHHAVERGYWLTNNIQI |
| Orylat_2   | MAKGGEERVEW-ALRLILRHTV-DVRTAFPSL-RLHHAVERGYWLTNNVHI |
| Hetzeb_2   | MAKGGEERVEW-VNNLIKHHI-RVQTAYPSL-RLHHAVERGYWLTNRILI  |
| Lepocu_2   | MAKGGEERVQW-ASELILRHGI-NVRTAFPSL-RLHHAVERGYWLTNKVPI |
| Latcha_4   | MAKGGEKHVEC-VNELILKNKL-KVRTAYPSL-RLHHAVERG-----     |
| Astmex_4-A | MVKGGEKHVEC-VNELILKRKL-PLRTAYPSL-RLHHAVERGYWLTNKVNI |
| Angang_4   | MSKGGEDRVEC-VNDLILRHAI-RVRPPTPRS-GLIHAVERGYWLTNKVNI |
| Lepocu_4   | MVKGGEKHVEC-VNELILKNKL-KVRTAYPSL-RLHHAVERGYWLTNKINI |
| Amical_4   | MVKGGEKHVEC-VNELILKNKL-KVRTAYPSL-RLHHAVERGYWLTNKINI |
| Calmil_4   | MVKGGERHVEC-VNELILKNKL-SIQTAYPSL-RLHHAVERGYWLTNKVYI |
| Squaca_4   | MVKGGERHVEC-VNELILKNKL-SIQTAYPSL-RLHHAVERGYWLTNKVYI |
| Acisin_4   | MVKGGEKHVEC-VNELILKNKL-KVRTAYPSL-RLHHAVERGYWLTNKINI |
| Hetzeb_4   | MVKGGEKHVEC-VNELILKNKL-SIQTAYPSL-RLHHAVERGYWLTNKIYI |
| Petmar_4   | MAKGGEQHEI-VNNLLLTGL-PLRAAFPSL-RLMHAVERGYWLTNKVYI   |
| Letcam_4   | MAKGGEQHEI-VNNLLLTGL-PLRAAFPSL-RLMHAVERGYWLTNKVYI   |
| Eptbur_4   | MVPPERRVDA-VTDLIAHEHL-SLHPAMP-RLMHAVERGYWLTNNHVDI   |
| Latcha_1   | SMKTGTSLR-AYYTLSDFA-NQMVLFANP-DFLRHAAGFWKNGVHA      |
| Angang_1   | TMKPGTAPSLR-AYHALADAGS-NQTVLFANP-DFLRSVGGFWKGRGIHA  |
| Angang_1b  | SSRPGTDPSSLR-AGHALADSGS-EQTVLFASP-DFLRSVERFWKRGVRA  |
| Astmex_1   | SMKPGTEPSLR-AYHTLADTAS-NQTVLFANP-DFLKNVGRFWKSRGVHG  |
| Orylat_1   | SMAPGTDPSSLR-AYFALTDVPS-NLTMLFANP-DFLLSVSKFWKAHGVHA |
| Acisin_1   | SMKPGTDPSSLR-VYHTLSDVSA-NQTVLFANP-DFLRNVGKFWKSRGIHA |
| Lepocu_1   | SMKPGTDPSSLR-AYHALSDIGA-NQTVVFANP-DFLKNVGKFWKSRGIHA |
| Hetzeb_1   | SMKTGTDPSSLR-TYYTLSDFA-NQTVLFANP-DFLRNVEKFWKSGIHA   |
| Squaca_1   | SMKTGTDPSSLR-TYYTLSDFA-NQTVLFANP-DFLRNVEKFWKSGIHA   |
| Calmil_1   | SMKAGTEPSLR-TYYTLSDVNA-NQTVIFANP-DFLRNVGKFWKSGVHA   |
| Petmar_1   | SMRAATESSLR-VYHTLHDCHQ-NQTVVFANP-GFLHSAAGFWMDNGVRA  |
| Letcam_1   | SMRAATESSLR-VYHTLHDCHQ-NQTVVFANP-SFLHSAAGFWTENGVRA  |
| Eptbur_1   | STSLGTDPSSLR-AHAVIVRANS-AQSAIFMNP-DFLHNASFFWRARGLHA |
| Latcha_5   | YNTNRTDVSFR-VKYVLDDFES-QQSVYFFHP-QYLLNASRFSWNGQVRA  |
| Letcam_5   | YVGRNTDVALR-VRYTVRRQGL-PRPVLFHP-AYLASVGAFFWRARGVRA  |
| Lepocu_5   | YNTNRTDVSFR-VKYVLDDFES-QQSVYFFHP-QYLLNVQRFWMMQGVRA  |
| Squaca_5   | YNTNRTDVSFR-VKYVLDDFES-QQSMFYFHP-RYLENVSRFWMRQGLRA  |
| Angang_5   | YNTNRTDVSFR-VKYMLDDFDS-QKGVYFFHP-QYLLNVQRFWSLQGVRA  |
| Acisin_5   | YNTNRTDVSFR-VKYVLDDFDS-PQSVYFFHP-QYLLNVQRFWMMQGVMA  |
| Orylat_5   | YNTNRTDVSFR-VKYMLDDFDS-QRSVYFFHP-QYLLNVQRFWAVQGVRA  |
| Astmex_5   | YNTNRTDVSFR-VKYMLDDFDS-QRGVYFFHP-QYLLNVQRFWAVQGVRA  |
| Angang_5b  | YNTNRTDVSFR-VKYTMDDFDS-RRPVYFFHP-QYLLSVQRFWAIQGVRA  |
| Anates_5   | YNTNRTDVSFR-VKYMLDDFDS-QRGVYFFHP-QYLLNVQRFWAVQGVRA  |
| Calmil_5   | YNTNRTDVSFR-VRYALDDFSA-PQDLFYFHP-RYLENVARFWGRGLRT   |
| Hetzeb_5   | YNTNRTDVSFR-VKYVLDDFES-QQSMFYFHP-RYLENVSRFWMRQGLRA  |
| Eptbur_5   | FGGRSMELALR-ARYVLDEAGS-SRPLYFFHP-ITYLAHVGAFFWRHGVQE |
| Latcha_6   | SFRSNTALSFR-VYHTLEAFRG-KQKTIFFHP-KYLKSLALFWRSKGIV   |
| Latmen_6   | SFRSNTALSFR-VYHTLEAFRG-KQKTIFFHP-KYLKSLALFWRSKGIV   |
| Squaca_6   | SYTKNTVLCFR-ALYTLQDFQA-KQKVFFHP-VYLKHLTEFWLSKGIQV   |
| Calmil_6   | YHSKNTALSFR-AHYTLQDFKS-KQRVYFFHP-ITYLKLALFWLSKGMQV  |
| Hetzeb_6   | SYSKNTDLCFR-ALYTLQDFQA-KQKVFFHP-VYLKHLALFWLSKGIQV   |
| Lepocu_8   | SYGHNTPVSLR-AYYTLQDFNS-PVRVFLNP-EYLQNLARFWKAHGLRT   |
| Acisin_8   | SYGRNTPVSLR-ALYTLQDFRS-PVRPIFLNP-RYLGSILARFWRARGLRS |
| Angang_8   | SYAHNTPVSLR-AFYTLRDFGG-RARPAFLSP-AYLQSLAHFWRAQGLRT  |
| Orylat_8   | SFGHNTALSMR-AFYTLEDFA-SARAVYFNP-EYLKHLALFWRSEGLKS   |
| Astmex_8   | SYSHNTPVSLR-ALYALEDFNAVGRPVFFNP-EYLSLARFWRGRGLRT    |
| Amical_8   | SYSRNTPVSLR-ALYTLQDFDS-PVRPVFLNP-EYLHNLARFWKAQGLQA  |
| Anates_8   | SYGHNTPVSLR-AFYTIEDFDS-PTRPVFFNP-EYLQSLALFWRSQGLRA  |
| Lepocu_8b  | SYSRNTPVSLR-ALYTLQDFDS-PVRPVFLNP-EYLHNLARFWKAQGLQA  |
| Lepocu_7   | VFPCHTEPCVR-AFYSLLELRP-QQALFFSP-QYLRQLALYWRQGLHP    |
| Lepocu_7b  | AFSCTDPCFR-VYYTLQDNRP-HQALFYHP-DYLRQLATYWQEKGLRE    |
| Angang_b   | SYVVGTELSFR-VFHTMKDMRP-QQEVYFFHP-DYLFRLARYWQKGLTG   |
| Latcha_7   | SQSFAEISLA-VAYALEDFGS-KQKAIFFFHP-AYLRQLGSLRWSGWVRA  |
| Angang_7   | AYTCTDISFK-VHKVVQKMRP-NQKVFFNP-EYLLELFQYWKHGLEE     |
| Eptbur_7   | AYVHNLPLALR-AHRALEAAGA-RQKAVFFHP-DYLRRLARLWAARGLRP  |
| Petmar_7   | AYVHNLPLALR-AHRALEAAGA-RQKAVFFHP-DYLRRLARLWAARGLRP  |
| Letcam_7   | AYVHNLPLALR-AHRALEAAGA-RQKAVFFHP-DYLRRLARLWAARGLRP  |
| Petmar_7b  | AYVHNLPLALR-AHRALEAAGA-RQKAVFFHP-DYLRRLARLWAARGLRP  |
| Letcam_7r  | HLTHNTLA-YKQAFYTMDDFAT-GQSILFLNP-NYSRGLRALWNHQQGLAS |
| Petmar_7r  | HLTHNTLA-YK-AFYTMDDFAT-GQSILFLNP-NYSRGLRALWNHQQGLAS |
| Eptbur_7r  | HLTHNTLA-YK-AFYTMDDFAT-GQSILFLNP-NYSRGLRALWNHQQGLAS |
| Angang_3   | KRLSTGILMYTLASAMCEEIHLYGFWPFGWDPN---TGK-----        |

|            |                                                |
|------------|------------------------------------------------|
| Lepocu_3   | KRLSTGILMYTTLASAMCEEIHLYGFWPFGWDPN---TGK-----  |
| Latcha_3   | KRLSTGILMYTTLASAMQCEIHLYGFWPFGWDPN---SGK-----  |
| Squaca_3   | KRLSTGILMYTTLASAICEEIHLYGFWPFAWDPN---TGK-----  |
| Astmex_3   | KRLSTGILMFTTLASSLCEQIHLYGFWPFGWDPN---TGK-----  |
| Orylat_3   | KRLSTGILMYTTLASSMCDQIHLYGFWPFGWDPN---TGK-----  |
| Hetzeb_3   | KRLSTGILMYTTLASAICEEIHLYGFWPFAWDPN---TGK-----  |
| Anates_3   | KRLSTGILMYTTLASSMCDQIHLYGFWPFGWDPN---TGK-----  |
| Acisin_3   | KRLSTGILMYTTLASSMCEEIHLYGFWPFGWDPN---TGK-----  |
| Masarm_3   | KRLSTGILMYTTLASSMCDQIHLYGFWPFGWDPN---TGK-----  |
| Calmil_3   | KRLSTGILMYTTLASSVCEEIHLYGFWPFAWDPN---TGR-----  |
| Orymel_9   | KRLSTGILMYTTLAFAMCDEIHLYGFWPFGWDPN---TGK-----  |
| Anates_9   | KRLSTGILMYTTLAYAMCDEIHLYGFWPFGWDPN---TGK-----  |
| Masarm_9   | KRLSTGILMYTTLASAMCDEIHLYGFWPFGWDPN---TGK-----  |
| Orylat_9   | KRLSTGILMYTTLAFSMCDEIHLYGFWPFGWDPN---TGK-----  |
| Eptbur_3/9 | KRLSTGILMYTTLASAFCEISLYGFWPFAWEPI---SGR-----   |
| Letcam_3/9 | KRLSTGLLMASLCSLDRDLYGFWPFAWDPR---TGS-----      |
| Anates_2   | KRPSTGLLMYTLMATRFCEEIHLYGFWPFLDPQ---G-K-----   |
| Latcha_2   | KRPSTGLLMYTTLATRFCEEIHLYGFWPFPDRHS---E-R-----  |
| Amical_2   | KRPSTGLLMYTTLATRFCEEIHLYGFWPFSRGA---G-N-----   |
| Acisin_2   | KRPSTGLLMYTTLATRFCEEIHLYGFWPFPQDQD---G-N-----  |
| Angang_2   | KRPSTGLLMYTLMATRFCEEIHLYGFWPFPQDPQ---G-N-----  |
| Astmex_2   | KRPSTGLLMYTLMATRFCEEIHLYGFWPFPDRSE---G-K-----  |
| Orylat_2   | KRPSTGLLMYTLMATRFCEEIHLYGFWPFPVDSH---G-K-----  |
| Hetzeb_2   | KRPSTGLLMYTTLATRFCEEIHLYGFWPFPKDQK---G-N-----  |
| Lepocu_2   | KRPSTGLLMYTTLATRFCEEIHLYGFWPFSLGPV---G-L-----  |
| Latcha_4   | -----                                          |
| Astmex_4-A | KRPSTGLLMYTLMATRFCEEIHLYGFWPFPKDAN---G-I-----  |
| Angang_4   | KRPSTGLLMYTTLATRFCEEIHLYGFWPFPKDLG---G-N-----  |
| Lepocu_4   | KRPSTGLLMYTTLATRFCEEIHLYGFWPFPKDSQ---G-R-----  |
| Amical_4   | KRPSTGLLMYTTLATRFCEEIHLYGFWPFPKDTK---G-R-----  |
| Calmil_4   | KRPSTGLLMYTTLATRFCEEIHLYGFWPFPKDAN---G-T-----  |
| Squaca_4   | KRPSTGLLMYTTLATRFCEEIHLYGYWFPFPKDAK---G-A----- |
| Acisin_4   | KRPSTGLLMYTLMATRFCEEIHLYGFWPFPKDSH---G-K-----  |
| Hetzeb_4   | KRPSTGLLMYTTLATRFCEEIHLYGYWFPFPKDAK---G-T----- |
| Petmar_4   | KRPSTGLLMYTTLATRFCEEIHLYGFWPFPQYNIA---G-K----- |
| Letcam_4   | KRPSTGLLMYTTLATRFCEEIHLYGFWPFPQYNIA---G-Q----- |
| Eptbur_4   | KRPSTGLLMYTTLATRFCEEIHLYGFWPFPHSDTE---G-R----- |
| Latcha_1   | KRLSTGFLVSAALGLCEEVTLYGFWPFSVDLH---G-V-----    |
| Angang_1   | KRLSTGFLVSAALGLCEEVTLYGFWPFSVDLE---E-R-----    |
| Angang_1b  | KRLSTGFLVSAALGLCEEVTLYGFWPFSVDPR---G-R-----    |
| Astmex_1   | KRLSTGFLVSLALGLCEEVTLYGFWPFSVGLD---E-R-----    |
| Orylat_1   | KRLSTGFLVSLAMGLCEEVTLYGFWPFSVDLD---E-Q-----    |
| Acisin_1   | KRLSTGFLVSLALGLCEEVTLYGFWPFSVDLQ---E-R-----    |
| Lepocu_1   | KRLSTGFLVSLALGLCEEVTLYGFWPFSVDLN---E-R-----    |
| Hetzeb_1   | KRLSTGFLVSVLALGLCEEVTLYGFWPFSMDLQ---G-T-----   |
| Squaca_1   | KRLSTGFLVSVLALGLCEEVTLYGFWPFSMDLQ---G-R-----   |
| Calmil_1   | KRLSTGFLVSVLALGLCEEVTLYGFWPFSSTDLE---E-R-----  |
| Petmar_1   | KRLSTGFLVSAALGMCEEVTLYGFWPFSSEDLS---G-R-----   |
| Letcam_1   | KRLSTGFLVSAALGMCEEVTLYGFWPFSSEDLS---G-R-----   |
| Eptbur_1   | KRLSTGFLVSAALGMCEEVTLYGFWPFSSEDLS---G-R-----   |
| Latcha_5   | KRLSSGLMLVTAALCCEVHLYGFWAFPMNPS---G-I-----     |
| Letcam_5   | KRLSSGLMLVTAALCCEVHLYGFWAFPMNPS---G-D-----     |
| Lepocu_5   | KRLSSGLMLVTAALCCEVHLYGFWAFPMNPS---G-I-----     |
| Squaca_5   | KRLSSGLMLVTAALCCEVHLYGFWAFPMNPS---G-L-----     |
| Angang_5   | KRLSSGLMLVTAALCCEVHLYGFWAFPMNPA---G-I-----     |
| Acisin_5   | KRLSTGMLVTAALCCEVHLYGFWGFPMDPN---G-I-----      |
| Orylat_5   | KRLSSGLMLVTAALCCEVHLYGFWAFPMNPS---G-V-----     |
| Astmex_5   | KRLSSGLMLVTAALCCEVHLYGFWAFPMNPS---G-I-----     |
| Angang_5b  | KRLTSGMLVTAALCCEVHLYGFWAFPMNPS---G-I-----      |
| Anates_5   | KRLSSGLMLVTAALCCEVHLYGFWAFPMNPS---G-I-----     |
| Calmil_5   | KRPSSGLMLVTAALCCEVHLYGFWGFPMDPS---G-I-----     |
| Hetzeb_5   | KRLSSGLMLVTAALCCEVHLYGFWAFPMNPS---G-L-----     |
| Eptbur_5   | KRLSSGLMLVTAALCCEVHLYGFWAFPMNPS---G-A-----     |
| Latcha_6   | KRLSSGLMLVTAALCCEVHLYGFWAFPMNPS---G-K-----     |
| Latmen_6   | KRLSSGLMLVTAALCCEVHLYGFWAFPMNPS---G-K-----     |
| Squaca_6   | KRLSSGLMLVTAALCCEVHLYGFWAFPMNPS---G-R-----     |
| Calmil_6   | KRLSSGLMLVTAALCCEVHLYGFWAFPMNPS---G-E-----     |
| Hetzeb_6   | KRLSSGLMLVTAALCCEVHLYGFWAFPMNPS---G-K-----     |
| Lepocu_8   | KRLSSGLMLVTAALCCEVHLYGFWAFPMNPS---SKQ-----     |
| Acisin_8   | KRLSSGLMLVTAALCCEVHLYGFWAFPMNPS---G-S-----     |
| Angang_8   | KRLSSGLMLVTAALCCEVHLYGFWAFPMNPS---DRR-----     |
| Orylat_8   | KRLSSGLMLVTAALCCEVHLYGFWAFPMNPS---SHQ-----     |
| Astmex_8   | KRLSSGLMLVTAALCCEVHLYGFWAFPMNPS---GRQ-----     |
| Amical_8   | KRLSSGLMLVTAALCCEVHLYGFWAFPMNPS---SKH-----     |
| Anates_8   | KRLSSGLMLVTAALCCEVHLYGFWAFPMNPS---DLH-----     |
| Lepocu_8b  | KRLSSGLMLVTAALCCEVHLYGFWAFPMNPS---SKH-----     |
| Lepocu_7   | KRLSSGLMLVTAALCCEVHLYGFWAFPMNPS---R-R-----     |

|            |                                                           |
|------------|-----------------------------------------------------------|
| Lepocu_7b  | TRLSTGLMMVSAALELCDRVELYGFWPFSDLS---E-R-----               |
| Angang_b   | LRLSSGFMVLSVALELCVKDIYGFWPFPTDLI---Q-K-----               |
| Latcha_7   | RRLSSGMLVSAALELCDSVALYGFWPFSTGLD---G-E-----               |
| Angang_7   | LRLTTGLMLASVAMELCDSVHLYGFWPFELDLF---Q-C-----              |
| Eptbur_7   | QRLSTGLMLASASLTLCRQVHLYGFWPLERGPD---G-A-----              |
| Petmar_7   | QRLSTGLMLASASLTLCRQVHLYGFWPLERGPD---G-A-----              |
| Letcam_7   | QRLSTGLMLASASLTLCRQVHLYGFWPFERGPD---G-A-----              |
| Petmar_7b  | QRLSTGLMLASASLTLCRQVHLYGFWPLERGPD---G-A-----              |
| Letcam_7r  | KYLSAGLHMTSAALEACEEVHLFGFWPMEIASVSRRGRRGRRRSRTSI          |
| Petmar_7r  | KYLSAGLHMTSAALEACEEVHLFGFWPMEIASVSRRGRRGRRSR--TSI         |
| Eptbur_7r  | KYLSAGLHMTSAALEACEEVHLFGFWPMEM-----                       |
|            |                                                           |
| Angang_3   | -ELPYHHYDKKGTKFTTKWQESHQLPSEFKLLYKMHTDG-----VIKLSLSHCA--  |
| Lepocu_3   | -ELPYHHYDKKGTKFTTKWQESHQLPTEFKLLYKMHTEG-----LTKLSLSHCA--  |
| Latcha_3   | -DLPHYHYDKKGTKFTTKWQESHQLPAEFKLLYKMHGEG-----LTKLTLSHCA--  |
| Squaca_3   | -ELPYHHYDKKGTKFTTKWQESHQLPAEFKLLFKLHTDG-----LTKLTLSHCAS-- |
| Astmex_3   | -ELPYHHYDKKGTKFTTKWQESHQLPTEFKLLFKMHTEG-----VLKLSLSHCA--  |
| Orylat_3   | -ELPYHHYDRKGTKFTTKWQESHQLPAEFKLLHKMHTEG-----LLKLTLSHCA--  |
| Hetzeb_3   | -ELPYHHYDKKGTKFTTKWQESHQLPAEFKLLFKLHTDG-----LTKLTLSHCAS-- |
| Anates_3   | -ELPYHHYDKKGTKFTTKWQESHQLPAEFKLLYKMHMEG-----LLKLTLSHCA--  |
| Acisin_3   | -DLPHYHYDKKGTKFTTKWQESHQLPTEFKLLYKMHGEG-----LTKLTLSHCA--  |
| Masarm_3   | -ELPYHHYDKKGTKFTTKWQESHQLPAEFKLLYKMHMEG-----LLKLTLSHCA--  |
| Calmil_3   | -ELPYHHYDKKGTKFNTNWQETHQLPAEFKILFKMHTAG-----LTKLSLSPCVS-- |
| Orymel_9   | -ELPYHHYDKKGTKFTTKWQETHQLPSEFKLLYKLHREG-----VTKLGLSHCT--  |
| Anates_9   | -DLPHYHYDKKGTKFTTKWQETHQLPSEFKLLYKLHREG-----VTKLSLTHCT--  |
| Masarm_9   | -ELPYHHYDKKGTKFTTKWQETHQLPSEFKLLYKLHREG-----VIKLSLTHCIA-- |
| Orylat_9   | -DLPHYHYDKKGTKFTTKWQETHQLPSEFKLLYKLHREG-----VTKLGLSHCT--  |
| Eptbur_3/9 | -PLPHYHYARRGARFTTAWQEAHQLPAEFRLFQQHLHGQG-----ALRLHLGSCT-- |
| Letcam_3/9 | -PIPHYHYDAPGAKFSTRWQESHQLPLEFQLLRSLHAHG-----ALRLLEACA--   |
| Anates_2   | -PVKYHHYDALKYEYTS--SSPHTMPLEFRTLALHRQG-----ALRLHTGQCD--   |
| Latcha_2   | -PVKYHHYDSLTYEYTSQ--ASPHTMPLEFRTLGLHQQG-----ALKLTVGECA--  |
| Amical_2   | -PVKYHHYDSLTYEYTAQ--SSPHTMPLEFKTLKNLHSQG-----ALQLHTGPCN-- |
| Acisin_2   | -PVKYHHYDSLTYEYTSQ--SSPHTMPL-----                         |
| Angang_2   | -PMKYHHYDTLTYEYDSH--SSPHTMPLEFSTLRLDLSQG-----ALRLHIGRCGAD |
| Astmex_2   | -PVKYHHYDTLKYQYTSS--SSPHTMPLEFRTLSTLHRQG-----ALRLHTETCR-- |
| Orylat_2   | -AVKYHHYDSLKYEYTS--SSPHTMPLEFRTLSTLHRQG-----ALRLHTGSCE--  |
| Hetzeb_2   | -VVKYHHYDSLTYEYNSR--ATPHTMPLEFKTLRNMHLQG-----ALKLVGECNLT  |
| Lepocu_2   | -PVKYHHYDSLTYEYRAQ--SSPHSMPVEFRALKRLHSQG-----ALKLHTGECN-- |
| Latcha_4   | -----                                                     |
| Astmex_4-A | -PVKYHHYDCLKYRYFSS--AGPHRMPLEFKTLKTLHSGK-----ALKLTTSKCR-- |
| Angang_4   | -PVKYHHYDALKYRYFSK--ASPHRMPLEFKTLKTLHSGK-----ALKLTTSKCARP |
| Lepocu_4   | -PVKYHHYDELKYRYFSN--ASPHRMPLEFKTLKMLHNKG-----ALKLTTTCKT-- |
| Amical_4   | -LVKYHHYDELKYRYFSN--ASPHRMPLEFKTLKTLHNKG-----ALKLTTSTCA-- |
| Calmil_4   | -PVKYHHYDNLKYRYFSN--AGPHRMPLEFKTLKSLHDRG-----ALKLTTGKCGQP |
| Squaca_4   | -PVKYHHYDNLKYRYFSN--AGPHRMPLEFKTLKSLHDKG-----ALKLTTGKCV-- |
| Acisin_4   | -SVKYHHYDELKYRYFSN--ASPHRMPLEFKTLKMLHNKG-----ALKLTTSKCA-- |
| Hetzeb_4   | -PVKYHHYDNLKYRYFSN--VGPHRMPLEFKTLKSLHDRG-----ALKLTTGKCV-- |
| Petmar_4   | -PVRYHHYEGRLRYRYSR--AGPHTMPLEYRTLHRLHSLG-----ALKLTTGKCT-- |
| Letcam_4   | -PVRYHHYEGRLRYRYSR--AGPHAMPEYRTLHRLHSLG-----ALKLTTGKCT--  |
| Eptbur_4   | -PVPYHHYEVMSYSYYSR--SSPHAMPEFQALHRLHELG-----ALRMRTQACT--  |
| Latcha_1   | -SISHHHYDNVLPY----TGPHAMPEEFQLWLLHKIG-----ILRMQIGQCK--    |
| Angang_1   | -PISHHHYDNVLPY----SGFHAMPEEFQLWHLHKTG-----TLRMHIGQCPDA    |
| Angang_1b  | -PVGHHYNDVPPL----WGVHAMPEEFRLWLHKGK-----ALRMVDSQPRE       |
| Astmex_1   | -PVSHHHYDNILPS----SGFHAMPEEFQLWHLHKS-----TLRLRVGSCV--     |
| Orylat_1   | -PISHHHYDNILPY----KWFHAMPEEFVQLWHLHKS-----ILRMKVGHCS--    |
| Acisin_1   | -FISHHHYDNVMPF----SGFHAMPEEFQLWHLHQSG-----TLRMQVGRCD--    |
| Lepocu_1   | -FISHHHYDNILPF----SGFHAMPEEFQLWVLHKTG-----TLRMVVGQCE--    |
| Hetzeb_1   | -IISHHHYDNVMPY----SGYHAMPEEFQLWLLHKS-----ILKMQIGKCEEN     |
| Squaca_1   | -IISHHHYDNVMPY----SGYHAMPEEFQLWLLHKS-----ILKMQIGKCEEN     |
| Calmil_1   | -TISHHHYDNVMPD----TSYHAMPEEFQLWLLHKS-----ILKIHVKGCGQI     |
| Petmar_1   | -AISHHHYDDVPPL----WYYHAMPEEFQLWMLHQRG-----ILRMHLEQCD--    |
| Letcam_1   | -AISHHHYDDVPPL----WYYHAMPEEFQLWMLHQRG-----ILRMHLEQCD--    |
| Eptbur_1   | -HLQHHYDLSHLPL----PVYHSMQEFSLWELHEQGLQDRREKVHKRYRSLCRL    |
| Latcha_5   | -FITHHHYDNVKPR----PGFHAMPSEIFKFLHMHSKG-----VLRVHTGTCS--   |
| Letcam_5   | -SLAHHHYDDAKPR----PGFHAMPAETVHLMHLHARG-----TLHLHTEPCP--   |
| Lepocu_5   | -FITHHHYDNVKPR----PGFHSMPNEIFSFLHLHSG-----ILQVHTSPCR--    |
| Squaca_5   | -YITHHHYDNVKPR----PGFHKMTTEIFNFLHMHSKG-----ILQVHTGTCS--   |
| Angang_5   | -FITHHHYDNVKPR----PGFHAMPHEIFNFLHLHSG-----ILHVHTNPCR--    |
| Acisin_5   | -FMTHHHYDNVKPR----PGFHAMPHEIFNFLHLHSG-----ILQVHTRACS--    |
| Orylat_5   | -YITHHHYDNVKPR----PGFHAMPHEIFNFIMHTRG-----IINVHTDQCM--    |
| Astmex_5   | -FITHHHYDNVKPR----PGFHAMPHEIFNFLHMHARG-----IVHVHTGVCR--   |
| Angang_5b  | -FIMHHYDNIKPR----PGFHAMPSEIFSFLHLHSG-----ILHVHTNHCR--     |
| Anates_5   | -FITHHHYDNVKPR----PGFHAMPHEIFNFIMHSG-----IINVHTGQCT--     |
| Calmil_5   | -HITHHHYDNVKPR----PGFHSMPNEIFTFLHMHSRG-----VLQVHTTPCR--   |
| Hetzeb_5   | -YITHHHYDNVKPR----PGFHKMTTEIFNFLHMHSRG-----ILQVHTGICS--   |
| Eptbur_5   | -HLSHHHYDDQRP--PGIHVMPIENFHFLQLHSG-----ILRVHTQRC--        |
| Latcha_6   | -NISHHHYDNQLPK----PGIHSMKPEFYHFLKLNKG-----IIKLQFGRCD--    |

|           |                                                           |
|-----------|-----------------------------------------------------------|
| Latmen_6  | -NISHHYDNLQPK-----PGIHSMPEFYHFLKLHNKG-----I IKLQFGRCD--   |
| Squaca_6  | -VMSHHYFDNLLPK-----PDVHSMPEFHQLLQMHSKG-----I IKLQTAQCQAD  |
| Calmil_6  | -LMSHHYFDSLAE-----PDLHSTSNEFYQLLRMHSG-----IVKLQMGQCEAE    |
| Hetzeb_6  | -VVSHHYFDNLLPK-----PDTHSMPLFHHLLQMHSKG-----MIKLQMTQCQAD   |
| Lepocu_8  | -HLTNHYDDQQSK-----KSFHAMPAEFEQLRLHSQG-----VIRVHLGSC---    |
| Acisin_8  | -PLLHHYYDDRRSP-----SSIHAMPAEFSQLLGLHRQG-----VLRIQLGRCQ--  |
| Angang_8  | -PLTNHYDDRQ GK-----KKVHAMPAEFGHLLRLHRQG-----VVRVHLGQCEDR  |
| Orylat_8  | -GLTNHYDDRKAK-----NKFHAMPTFENLLLQLHRKG-----VLRHLGLDCT--   |
| Astmex_8  | -TITNHYDNRQSK-----KNVHSMPEFEHLLRLHVSQ-----VIQLHLGECs--    |
| Amical_8  | -PLTNHYDDQQAK-----KTIHAMSTEFSHLLMLHNQG-----I IRVQLGKCQ--  |
| Anates_8  | -VLTNHYDDRKT-----TKFHAMPAEFELLLRLHSQG-----VLRHLGLGEC--    |
| Lepocu_8b | -PLTNHYDDQQAK-----KTIHAMSTEFSHLLMLHNQG-----I IRVQLGKCQ--  |
| Lepocu_7  | -PLSHHYFDDVGP-----PGAHMMAEEFLKLLQLHSQG-----ALQLHLGPCP--   |
| Lepocu_7b | -PLSNHYDDVPPN-----RGMHAMPEEFRLLRMHSG-----VLRRLRVGQCP--    |
| Angang_b  | -PVTHHYDNNVAK-----QGVHAMPEEFLTLHMHSG-----VLQLHVGKCQ--     |
| Latcha_7  | -AVLHHYDNPPE-----PGVHAMSEFVHYLQMHSKG-----VLQLHVGKC---     |
| Angang_7  | -PVTHHYDNVGPS-----RRMHAMPKEFLQLLKMHCQG-----SIHLQLTRCH--   |
| Eptbur_7  | -SLPHHYFDDRPPR-----GAHDMPQEFSHYLLLSHG-----AIRLHMGACT--    |
| Petmar_7  | -SLPHHYFDDRPPR-----GAHDMPQEFSHYLLLSHG-----AIRLHMGACT--    |
| Letcam_7  | -SLPHHYFDDRPPR-----GAHDMPQEFSHYLLLSHG-----AIRLHMGACT--    |
| Petmar_7b | -SLPHHYFDDRPPR-----GAHDMPQEFSHYLLLSHG-----AIRLHMGACT--    |
| Letcam_7r | VTVRHSYFEQSDQE--SKGKEVFDLKMEFAHLLRLHTNG-----I IRLQLGACAV- |
| Petmar_7r | VTVQSYFEQSSQE--SKVKEVFDLKMEFAHLLRLHTNG-----I IRLQLGACAV-  |
| Eptbur_7r | -TVQSYFEQSSQE--SKVKEVFDLKMEFAHLLRLHTNG-----I IRLQLGACAV-  |

C) Multiple sequence alignments (ClustalX) of ST8Sia sequences used in figure 5:  
Substitution rate analysis of the impact of *st8sia* gene duplications and losses

Figure 5A

```

CLUSTAL X (1.81) multiple sequence alignment
1
Cluhar2      MSFEFRALLFGIVTMLVIFLIIADISVVE-EEIANIGESQKYYLHSSAPK
Denclu_2     MPFEFRALMFGIVTVLVAFILILADISEVE-EEIANTGIYQKFHSQNFIPK
Danrer_2     MSFEFRILMFGIGTALVIFVIIADISEVE-EEIANIEDSRKFHLKSVALQ
Hipcom_2     MTPTSRTLLFLFVTLVILIIADDISQVENEEQEALKSSQSTMKRLFPK
Cormar_2A    MQLEFRTVMFGIVTLLVIFLIIADIAEIE-EEIANIGGSRTLYLHSLIPK
Oncmyk_2A    MQLELRTL MFGIVTLLVIFLIIADIAEVQ-EEIGNIGGSRTLYLHSLIPK
Onctsh_2A    MQLEFRTL MFGIVTLLVIFLIIADIAEVQ-EEIGNIGGSRTLYLHSLIPK
Thythy_2A    MQLEFRTVMFAVVTLLVIFMIIADIAEVE-EEIANIGGSRTFYFLNLNLK
Salsal_2A    MHLEFRTL MFGIVTLLVVFLIIADIAEVQ-EEIGNIGGSRTLYLHSLIPK
Salalp_2A    MQLEFRTLIFGIVTLLVIFLIIADIAEVQ-EEIG-----
Oncmyk_2B    MQLELRTL MFGIVTVLVFLIIADIAEVE-KEIANLGGSRLYLQTLIPK
Onckis_2B    MQLELRTL MFGIVTVLVFLIIADIAEVE-KEIANLGGSRLYLHSLIPK
Salalp_2B    MQLELRTL MFGIVTVLVFLIIADIAEVE-KEIANLGGSRLYLHSLIPK
Salsal_2B    MQLELRTL MFGIVTVLVFLIIADIAEVE-KEIANFGGSRLCLHSLIPK
Thythy_2B    MQLEFRTL MFGIVTVLVFLIIADIAEVE-EEVANVGGSRK--LHSLIPK
Onctsh_2B    MQLELRTL MFGIVTVLVFLIIADIAEVE-KEIA-----
Cormar_2B    -----SLLILLKSKKKLR-----
Corclu_4     MRLSRKRWTICTISILVIFYKTKEITRSE-----
Corlav_4     MRLSRKRWTICTISILVIFYKTKEITRSE-----
Onckis_4     MRLSRKRWTICTISILVIFYKTKEITRSE-----
Oncmyk_4     MRLSRKRWTICTISILVIFYKTKEITRSE-----
Salsal_4     MRLSRKRWTICTISILVIFYKTKEITRSE-----
Salalp_4     MRLSRKRWTICTISILVIFYKTKEITRSE-----
Salfon_4     MRLSRKRWTICTISILVIFYKTKEITRSE-----
Thythy_4     MRLSRKRWTICTISILVIFYKTKEITRSE-----

51
Cluhar2      LNRSTVLVPSSAPVVKs-KGDNSSLAQ---FARNGTsASPAEWTfNRTLs
Denclu_2     SNRMPLKTSPLSLDSSKDLGSKAIKNCSSSHASKNKSVSDWSfNRTLs
Danrer_2     SNRSSDLNAAPTSLVTRYRSKVSSLASPSDIKRKTSNssSEWTFNRTLs
Hipcom_2     PRKRTSRRVGSTSLPRP--AAINHLEPG---DNSSGKLASSGWTfNKTLS
Cormar_2A    PNRNVAVKANPTPLISE--GEDKSPASP-SGLNNTRLSSDNWTFNRTLs
Oncmyk_2A    PNRNVAVKANPTPLGNE--GEEKSPASP-SGLKNATRLSSDNWTFNRTLs
Onctsh_2A    PNRNVAVKANPTPLGNE--GEEKSPASP-SGLKNATRLSSDNWTFNRTLs
Thythy_2A    PNRNTAVKANPTSLVSE--GEDKSPSP--SDSNNTRLSSDNWTFNRTLs
Salsal_2A    PNRNVAVKANPTPLVNE--GEDKSPASP-SGSKNSTRLSSDNWTFNRTLs
Salalp_2A    ---NVAVKANPTPLVNE--GEDKSPASP-SGSKNATRLSSDNWTFNRTLs
Oncmyk_2B    PNRNVAVKANPKPLVSE--GEDKSPASP-SYSNNTTKLSTDNWMFNRTLs
Onckis_2B    PNRNVAVKANPKPLVSE--GEDKSPASP-SYSNNTIKLSTDNWMFNRTLs
Salalp_2B    PNRNVAVKANPKPLVSE--GEDKRPASP-SYLNNTTKLSTDNWTFNRTLs
Salsal_2B    PNRNVAVKANPKPLVSE--GEDKSPAST-SYSNNTTKLSTDNWTFNRTLs
Thythy_2B    PNRNVAVKANPKPLVSE--GEDKSPASP-SGSNNTTKLSSDNWTFNRTLs
Onctsh_2B    ---NVAVKANPKPLVSE--GEDKSPDSP-SYSNNTTKLSTDNWMFNRTLs
Cormar_2B    ---NVAVKANPKPLVSE--GEDKSPASP-SYSNNTTKLSSDNWTFNRSLS
Corclu_4     -EHQEAQVTGDSELDTSRLMVNSSEKSSRSRG-PSFFQHsVEGWRLNSSLV
Corlav_4     -EHQEAQVTGDSELDTSRLMVNSSEKSSRSRG-PSFFQHsVEGWRLNSSLV
Onckis_4     -EHQEAQVTG--ELGTSRLMVNSSEKSSRSRGVPSFFQHsVEGWVRVNSSLV
Oncmyk_4     -EHQEAQVTG--ELGTSRLMVNSSEKSSRSRGVSSFLQHsVEGWVRVNSSLV
Salsal_4     -EHQEAQVTGDSELGTSRLMVNSSEKSSRSRGVPSFFQHsVEGWVRVNSSLV
Salalp_4     -EHQEAQVTGDSELGTSRLMVNSSEKSSRSRGVPSFFQHsVEGWVRVNSSLV
Salfon_4     -EHQEAQVTGDSELGTSRLMVNSSEKSSRSRGVPSFFQHsVEGWVRVNSSLV
Thythy_4     -EHQEAQVTGDSELGTSRLMVNSSDKSSRSRGVPSFFQHsVKGWRVNSSLV

101
Cluhar2      NMIRKNILKFLDPERDISILKGTLPKGDIIHYVfDRQSTMNvSENLYRLL
Denclu_2     SLIRKNILRFLDAERDISILKGTLPKGDVVHYIFDRQSTMNISENLYRLL
Danrer_2     NLIRKNILKFLDPERDISILKSTFKPGDVIHYIFDRQSTTNISENRYHLL
Hipcom_2     KLIRKNVLRFLDPERDISILKGLRPGDVVHYVfDRHSTTNISENLHRL
Cormar_2A    SLIRKNILRFFDPERDISILKGTLPKGDVIHYIFDRQSTTNISENLYRLL
Oncmyk_2A    SLIRKNILGFFDPERDISILKGTLPKGDVIHYVfDRQSTTNISENLYQLL
Onctsh_2A    SLIRKNILGFFDPERDISILKGTLPKGDVIHYVfDRQSTTNISENLYRLL
Thythy_2A    SLIRKNILRFFDPERDISILKGTLPKGDVIHYIFDRQSTTNISENLYRLL
Salsal_2A    SLIRKNILGFFDPERDISILKGTLPKGDVIHYIFDRQSTTNISENLYRLL
Salalp_2A    SLIRKNILRFFDPERDISILKGTLPKGDVIHYVfDRQSTTNISENLYRLL
Oncmyk_2B    NLIRKNILRFFDPERDISILKGTLPKGDVIHYIFDRQSTTNISENLYQLL

```

|           |                                                       |
|-----------|-------------------------------------------------------|
| Onckis_2B | NLIRKNILRFFDPERDISILKGTLPKGDVIHYIFDRQSTTNISENLYQLL    |
| Salalp_2B | NLIRKNILRFFDPERDISILKGTLPKGDIIHYIFDRQSTTNISENLYQLL    |
| Salsal_2B | NLIRKNILRFFDPERDISILKGTLPKGDVIHYIFDRQSTTNISENLYQLL    |
| Thythy_2B | NLIRKNILRFFDPERDISILKGTLPKGDVIHYIFDRQSTTNISENLYRLL    |
| Onctsh_2B | NLIRKNILRFFDPERDISILKGTLPKGDVIHYIFDRQSTTNISENLYQLL    |
| Cormar_2B | NFYRKNILRFFDPERDISILKGTLPKGDVIHYIFDRQSTTNISENLYRLL    |
| Corclu_4  | LMIRKDVLRFLDAERDVSVVKSSFKPGDTIHYVLDRRRTLNI SHTLHSL    |
| Corlav_4  | LMIRKDVLRFLDAERDVSVVKSSFKPGDTIHYVLDRRRTLNI SHTLHSL    |
| Onckis_4  | LMIRKDVLRFLDAERDVSVVKSSFKPGDTIHYVLDRRRTLNI SHTLHSL    |
| Oncmky_4  | LMIRKDVLRFLDAERDVSVVKSSFKPGDTIHYVLDRRRTLNI SHTLHSL    |
| Salsal_4  | LMIRKDVLRFLDAERDVSVVKSSFKPGDTIHYVLDRRRTLNI SHTLHSL    |
| Salalp_4  | LMIRKDVLRFLDAERDVSVVKSSFKPGDTIHYVLDRRRTLNI SHTLHSL    |
| Salfon_4  | LMIRKDVLRFLDAERDVSVVKSSFKPGDTIHYVLDRRRTLNI SHTLHSL    |
| Thythy_4  | LMIRKDVLRFLDAERDVSVVKSSFKPGDTIHYVLDRRRTLNI SHTLHSL    |
|           | 151                                                   |
| Cluhar2   | PTASPMKNQHKKSCAIVGNSGILLNSSCGPEIDAHDFVIRC NLAPVNEFS   |
| Denclu_2  | PTASPMKNQHRLCAIVGNSGILLNSSCGPEIDSHDFVIRC NLAPVEEYA    |
| Danrer_2  | PTVSPMKNQHYRKCAIVGNSGILLNSSCGREIDSHDFVIRC NLAPVEEYA   |
| Hipcom_2  | PSVSPLKNRHYRLCAIVGNSGILLNSSCGSQIDSHDFVIRC NLAPVEEYA   |
| Cormar_2A | PTASPMKNQHRRCAIVGNSGILLNSSCGPEIDSHDFVIRC NLAPVEEYA    |
| Oncmky_2A | PTASPMKNQHRRCAIVGNSGIQLNSSCGPEIDSHDFVIRC NLAPVEEYA    |
| Onctsh_2A | PTASPMKNQHRRCAIVGNSGILLNSSCGPEIDSHDFVIRC NLAPVEEYA    |
| Thythy_2A | PTASPMKNQHRRCAIVGNSGILLNSSCGPEIDSHDFVIRC NLAPVEEYA    |
| Salsal_2A | PTASPMKNQHRRCAIVGNSGILLNSSCGPEIDSHDFVIRC NLAPVEEYA    |
| Salalp_2A | PTASPMKNQHRRCAIVGNSGILLNSSCGPEIDSHDFVIRC NLAPVEEYA    |
| Oncmky_2B | PTASPMKNQHRRCAIIGNSGILLNSSCGPEIDSYDFVIRC NLAPVEEYA    |
| Onckis_2B | PTASPMKNQHRRCAIIGNSGILLNSSCGPEIDSYDFVIRC NLAPVEEYA    |
| Salalp_2B | PTASPMKNQHRRCAIIGNSGILLNSSCGPEIDSYDFVIRC NLAPVEEYA    |
| Salsal_2B | PTVSPMKNQYHRRCAIIGNSGILLNSSCGPEIDSYDFVIRC NLAPVEEYA   |
| Thythy_2B | PTTSPMKNQYHRRCAIVGNSGVLLNSSCGPEIDSHDFVIRC NLAPVEEYA   |
| Onctsh_2B | PTASPMKNQHRRCAIIGNSGILLNSSCGPEIDSYDFVIRC NLAPVEEYA    |
| Cormar_2B | PTVSPMKNQHRRCAIVGNSGILLNSSCGPEIDSYDFVIRGNQAPVEEYA     |
| Corclu_4  | PDVSPLKKNRKFCTCAVVGNSGVLLNSGCGKEIDRHDFVIRC NLAPLAEFA  |
| Corlav_4  | PDVSPLKKNRKFCTCAVVGNSGVLLNSGCGKEIDRHDFVIRC NLAPLAEFA  |
| Onckis_4  | PDVSPLKKNRFRCTCAVVGNSGVLLNSGCGKEIDSHDFVIRC NLPLSEFA   |
| Oncmky_4  | PDVSPLKKNRFRCTCAVVGNSGVLLNSGCGKEIDSHDFVIRC NLPLSEFA   |
| Salsal_4  | PDVSPLKKNRFRCTCAVVGNSGVLLNSGCGKEIDSHDFVIRC NLPLSEFA   |
| Salalp_4  | PDVSPLKKNRFRCTCAVVGNSGVLLNSGCGKEIDSHDFVIRC NLPLSEFA   |
| Salfon_4  | PDVSPLKKNRFRCTCAVVGNSGVLLNSGCGKEIDSHDFVIRC NLPLSEFA   |
| Thythy_4  | PDVSPLKKNRKFCTCAVVGNSGVLLHSGCGKEIDSHDFVIRC NLAPLADFA  |
|           | 201                                                   |
| Cluhar2   | ADVGHRTNLVTMNP SVVQRAFDLSSEEWRFVRRLQDLSG SVLWIPAF     |
| Denclu_2  | ADVGHRTDLVTMNP SVVQRAFDLANEEWRERFVQRLRALSG SVLWIPAF   |
| Danrer_2  | ADVGLRTSLVTMNP SVVQRAFDLNEEWWRFVQRLQLSLSG SVLWIPAF    |
| Hipcom_2  | DDVGHRTDLVTMNP SVVQRAFRDLVDDEWRRRFARRLASLSG SVLWIPAF  |
| Cormar_2A | GDVGRRTNLVTMNP SVVQRAFDLASEQWRERFLQRLRGLSG SVLWIPAF   |
| Oncmky_2A | GDVGRRTNLVTMNP SVVQRAFDLASEQWRERFLQRLRGLSG SVLWIPAF   |
| Onctsh_2A | GDVGRRTNLVTMNP SVVQRAFDLASEQWRERFLQRLRGLSG SVLWIPAF   |
| Thythy_2A | GDVGRRTNLVTMNP SVVQRAFDLASEQWRERFLQRLRGLSG SVLWIPAF   |
| Salsal_2A | GDVQRTNLVTMNP SVVQRAFDLASEQWRERFLQRLRGLSG SVLWIPAF    |
| Salalp_2A | GDVGRRTNLVTMNP SVVQRAFDLASEQWRERFLQRLRGLSG SVLWIPAF   |
| Oncmky_2B | GDVGRRTNLVTMNP SVVQRAFDLASEEWRERFLQRLRSLSG SVLWIPAF   |
| Onckis_2B | GDVGRRTNLVTMNP SVVQRAFDLASEEWRERFLQRLQSLSG SVLWIPAF   |
| Salalp_2B | GDVQRTNLVTMNP SVVQRAFDLASEEWRERFLQRLRSLSG SVLWIPAF    |
| Salsal_2B | GDVGRRTNLVTMNP SVVQRAFDLASEEWRERFLQRLRGLSG SVLWIPAF   |
| Thythy_2B | GDVGRRTNLVTMNP SVVQRAFDLASEEWRERFLQRLRGLSG SVLWIPAF   |
| Onctsh_2B | GDVGRRTNLVTMNP SVVQRAFDLASEEWRERFLQRLRSLSG SVLWIPAF   |
| Cormar_2B | GDVGRRTNLVTMNP SVVQRAFDLASEEWRERFLQRLRGLSG SVLWIPAF   |
| Corclu_4  | EDVGLRSDFTTMNP SVIQRVYGSGLKNATDTERFVQRLRMLNDS VLWIPAF |
| Corlav_4  | EDVGLRSDFTTMNP SVIQRVYGGGLKNATDTERFVQRLRMLNDS VLWIPAF |
| Onckis_4  | EDVGLRSDFTTMNP SVIQRAYGGLKNATDTERFVQRLRGLNDS VLWIPAF  |
| Oncmky_4  | EDVGLRSDFTTMNP SVIQRAYGGLKNATDTERFVQRLRGLNDS VLWIPAF  |
| Salsal_4  | EDVGLRSDFTTMNP SVIQRAYGGLKNATDTERFVQRLRGLNDS VLWIPAF  |
| Salalp_4  | EDVGLRSDFTTMNP SVIQRVYGGGLKNATDTERFVERLRGLNDS VLWIPAF |
| Salfon_4  | EDVGLRSDFTTMNP SVIQRAYGGLKNATDTERFVERLRGLNDS VLWIPAF  |
| Thythy_4  | EDVGLRSDFTTMNP SVIQRAYGGLKNATDTERFVHRLQVLNDS VLWIPAF  |
|           | 251                                                   |
| Cluhar2   | MAKGGEERVEWAIRLIIMHTVNVRTAFPSLRLLHAVRGYWL TNQVQIKRP   |
| Denclu_2  | MAKGGEERVEWAIRLILLHTVNVRTAFPSLRLLHAVRGYWL TNQVLIKRP   |
| Danrer_2  | MAKGGEERVEWAIRLILLHTVNVRTAFPSLRLLHAVRGYWL TNHVQIKRP   |
| Hipcom_2  | MAKGGEERVEWALRLILRHAADVRTAFPSLRLLHAVRGYWL TNKVHIKRP   |
| Cormar_2A | MAKGGEERVEWAIRLILLHTVDVHTAFPSLRLLHAVRGYWL TNNVQIKRP   |
| Oncmky_2A | MAKGGEERVEWAIRLILLHTVDVHTAFPSLRLLHAVRGYWL TNNVQIKRP   |
| Onctsh_2A | MAKGGEERVEWAIRLILLHTVDVHTAFPSLRLLHAVRGYWL TNNVQIKRP   |
| Thythy_2A | MAKGGEERVEWAIRLILLHTVDVHTAFPSLRLLHAVRGYWL TNNVQIKRP   |
| Salsal_2A | MAKGGEERVEWAIRLILLHTVDVHTAFPSLRLLHAVRGYWL TNNVQIKRP   |
| Salalp_2A | MAKGGEERVEWAIRLILLHTVDVHTAFPSLRLLHAVRGYWL TNNVQIKRP   |

|           |                                                      |
|-----------|------------------------------------------------------|
| Oncmyk_2B | MAKGGEERVEWAIRLILLHTVDVHTAFPSLRLLHAVRGYWLTNNVQIKRP   |
| Onckis_2B | MAKGGEERVEWAIRLILLHTVDVHTAFPSLRLLHAVRGYWLTNNVQIKRP   |
| Salalp_2B | MAKGGEERVEWAIRLILLHTVDVHTAFPSLRLLHAVRGYWLTNNI QIKRP  |
| Salsal_2B | MAKGGEERVEWAIRLILLHTVDVHTAFPSLRLLHAVRGYWLTNNVQIKRP   |
| Thythy_2B | MAKGGEERVEWAIRLILLHTVDVHTAFPSLRLLHAVRGYWLTNNVQIKRP   |
| Onctsh_2B | MAKGGEERVEWAIRLILLHTVDVHTAFPSLRLLHAVRGYWLTNNVQIKRP   |
| Cormar_2B | MAKGGEERVEWAIRLILLHTVDVHTAFPSLRLLHAVRRYWLTNNVQIKRP   |
| Corclu_4  | MVKGGERHVESVNELIVKRKLRVRTAYPSLRLIHAVRGYWLTNKINIKRP   |
| Corlav_4  | MVKGGERHVESVNELIVKRKLRVRTAYPSLRLIHAVRGYWLTNKINIKRP   |
| Onckis_4  | MVKGGERHVESVNELIVKRKLRVRTAYPSLRLIHVVRGYWLTNKINIKRP   |
| Oncmyk_4  | MVKGGERHVESVNELIVKRKLRVRTAYPSLRLIHVVRGYWLTNKINIKRP   |
| Salsal_4  | MVKGGERHVESVNELIVKRKLRVRTAYPSLRLIHVVRGYWLTNKINIKRP   |
| Salalp_4  | MVKGGERHVESVNELIVKRKLRVRTAYPSLRLIHVVRGYWLTNKINIKRP   |
| Salfon_4  | MVKGGERHVESVNELIVKRKLRVRTAYPSLRLIHVVRGYWLTNKINIKRP   |
| Thythy_4  | MVKGGERHVESVNELIVKRKLSVRTAYPSLRLIHAVRGYWLTNKINIKRP   |
|           | 301                                                  |
| Cluhar2   | TTGLLMYTMATRFCEIHLYGFWPFHRDHQGNVVKYHYD TLTYEFTSRA    |
| Denclu_2  | TTGLLMYTMATRFCEEIHLYGFWPFHRDAQGKPKVKYHYDALT YEYTSHS  |
| Danrer_2  | TTGLLMYTMATRFCEIHLYGFWPFADPDGKPKVKYHYD TLTYHYTSSA    |
| Hipcom_2  | TTGLLMYTMATRFCEEIHLYGFWPFSDAAGKAVKYHYD TLKYEYTSSS    |
| Cormar_2A | TTGLLMYTMATRFCEEIHLYGFWPFPRDSQGIPVKYHYD TLTYEYTS HA  |
| Oncmyk_2A | TTGLLMYTMATRFCEEIHLYGFWPFQDSQGKPKVKYHYD TLTYEYTS HA  |
| Onctsh_2A | TTGLLMYTMATRFCEEIHLYGFWPFPRDSQGKPKVKYHYD TLTYEYTS HA |
| Thythy_2A | TTGLLMYTMATRFCEEIHLYGFWPFPRNSQGKPKVKYHYD TLTYEYTS HA |
| Salsal_2A | TTGLLMYTMATRFCEEIHLYGFWPFPRDSQGKPKVKYHYD TLTYEYTS HA |
| Salalp_2A | TTGLLMYTMATRFCEEIHLYGFWPFPRDSQGKPKVKYHYD TLTYEYTS HA |
| Oncmyk_2B | TTGLLMYTMATRFCEEIHLYGFWPFQDSQGKPKVKYHYD TLTYEYTS HA  |
| Onckis_2B | TTGLLMYTMATRFCEEIHLYGFWPFQDSQGKPKVKYHYD TLTYEYTS HA  |
| Salalp_2B | TTGLLMYTMATRFCEEIHLYGFWPFQDSQGKPKVKYHYD TLTYEYTS HA  |
| Salsal_2B | TTGLLMYTMATRFCEEIHLYGFWPFQDSQGKSVKYHYD TLTYEYTS HA   |
| Thythy_2B | TTGLLMYTMATRFCEEIHLYGFWPFKDSQGKPKVKYHYD TLTYEYTS HA  |
| Onctsh_2B | TTGLLMYTMATRFCEEIHLYGFWPFQDSQGKPKVKYHYD TLTYEYTS HA  |
| Cormar_2B | TTGLLMYTMATRFCEEIHLYGFWPFQDSQGKPKVKYHYD TLTYTYTSHA   |
| Corclu_4  | STGLLMYTLATRFCEIHLYGFWPFPRDSNGNVVKYHYD LLKYRYFSNA    |
| Corlav_4  | STGLLMYTLATRFCEIHLYGFWPFPRDSNGNVVKYHYD LLKYRYFSNA    |
| Onckis_4  | STGLLMYTLATRFCEIHLYGFWPFPRDANGNMVKYHYD DMLKYRYFSNA   |
| Oncmyk_4  | STGLLMYTLATRFCEIHLYGFWPFPRDANGNMVKYHYD DMLKYRYFSNA   |
| Salsal_4  | STGLLMYTLATRFCEIHLYGFWPFPRDANGNMVKYHYD DMLKYRYFSNA   |
| Salalp_4  | STGLLMYTLATRFCEIHLYGFWPFPRDANGKIVKYHYD DMLKYRYFSNA   |
| Salfon_4  | STGLLMYTLATRFCEIHLYGFWPFPRDANGKIVKYHYD DMLKYRYFSNA   |
| Thythy_4  | STGLLMYTLATRFCEIHLYGFWPFPRDANGNVVKYHYD DMLKYRYFSNA   |
|           | 351                                                  |
| Cluhar2   | SPHTMPLEFRTLSTLHKQ GALRLHTSSCSSPAA                   |
| Denclu_2  | SPHTMPLEFRTLRLALHRQ GALRLHTGTCS PAA-                 |
| Danrer_2  | SPHTMPLEFRTL SALHRQ GALRLHTGPKPPT-                   |
| Hipcom_2  | SPHSMPLEFRTLRLALHHQ GALRLHTGNCHAQPE                  |
| Cormar_2A | SPHTMPLEFRTLSSLHRQ GALRLNTGSCDAGM-                   |
| Oncmyk_2A | SPHTMPLEFRTLSSLHRQ GALRLNTGSCDVGT-                   |
| Onctsh_2A | SPHTMPLEFRTLSSLHRQ GALRLNTGSCDTGM-                   |
| Thythy_2A | SPHTMPLEFRTLSSLHRQ GALQLNTGSCDARM-                   |
| Salsal_2A | SPHAMPLEFRTLSSLHRQ GALRLNTGSCDAGM-                   |
| Salalp_2A | SPHTMPLEFRTLSSLHRQ GALRLNTGSCDAGM-                   |
| Oncmyk_2B | SPHTMPLEFRTLSSLHRQ GALRLHTGSCDVGT-                   |
| Onckis_2B | SPHTMPLEFRTLSSLHRQ GALRLHTGSCDVGT-                   |
| Salalp_2B | SPHTMPLEFRTLSSLHRQ GALRLHTGSCGVGT-                   |
| Salsal_2B | SPHTMPLEFRTLSSLHRQ GALRLHTGSCDVGT-                   |
| Thythy_2B | SPHTMPLEFRTLSSLHRQ GALRLHTGSCDAGI-                   |
| Onctsh_2B | SPHTMPLEFRTLSSLHRQ GALRLHTGSCDVGT-                   |
| Cormar_2B | SPHTMPLEFRTLSSLHRQ GALRLHTGSCDAGT-                   |
| Corclu_4  | GPHRMPLEFKTLKMLHSGALKLTTSKCES---                     |
| Corlav_4  | GPHRMPLEFKTLKMLHSGALKLTTSKCES---                     |
| Onckis_4  | GPHRMPLEFKTLKMLHSGALKLTTSKCES---                     |
| Oncmyk_4  | GPHRMPLEFKTLKMLHSGALKLTTSKCES---                     |
| Salsal_4  | GPHRMPLEFKTLKMLHSGALKLTTSKCES---                     |
| Salalp_4  | GPHRMPLEFKTLKMLHSGALKLTTSKCES---                     |
| Salfon_4  | GPHRMPLEFKTLKMLHSGALKLTTSKCES---                     |
| Thythy_4  | GPHRMPLEFKTLKMLHSGALKLTTSKCES---                     |

Figure 5B and C

CLUSTAL X (1.81) multiple sequence alignment

```

1
Latcal_3      IVFSIGENFRSLLPE----VSPILN---KHYNCAVVGNSGILTGSRGCP
Perflu_3      IVFSIGENFHSLLPA----VSPILN---KHYNCAVVGNSGILTGSHCGA
Serdum_3      IVFSIGENFRSLLPE----VSPILN---KHYNCAVVGNSGILTGSRGCP
Stepar_3      IVFSIGENFRSLLPE----ASPILN---KHYNCAVVGNSGILTGSRGCP
Tetcal_3      VVFSVSNFSRSLLE----VPPILK---MHYNTCAVVGNSGILTGSSCGA
Monalb_3      IVFSISENFRSLLPK----VSPVLN---KHYNCAVVGNSGILTGSRGCP
Molmol_3      IVFSIGENFRSLLPE----TSPILN---KHFNVCAVVGNSGILTGSRGCA
Takrub_3      VVFSIGENFRSLLPE----TSPILQ---KHYNCAVVGNSGILTGSRGCG
Canlupfam_3   VVFSISNNFRSLLPD----VSPIVN---KHFNICAVVGNSGILTGSRGCG
Bostau_3      VVFSISNNFRSLLPD----VSPIVN---KRYNICAVVGNSGILTGSRGCP
Homsap_3      VVFSISNNFRSLLPD----VSPIMN---KHYNICAVVGNSGILTFIQCGR
Siltro_3      VVFSISNNFRSLLPD----TSPVMN---KRYNCAVVGNSGILTGSQCGA
Anocar_3      VVFSISNSFRMLLPD----VSPIQN---KHYNICAVVGNSGILVGSQCGQ
Musmus_3      VVFSISNNFRSLLPD----VSPIMN---KRYNCAVVGNSGILTGSRGCG
Pantro_3      VVFSISNNFRSLLPD----VSPIMN---KHYNICAVVGNSGILTGSRGCG
Ratnor_3      VVFSISNNFRSLLPD----VSPILN---KRYNICAVVGNSGILTGSRGCG
Galgal_3      VVFSISNNFRSLLPD----VSPILN---KHYNCAVVGNSGILTGSRGCG
Lepocu_3      VVFSISNNFRSLLPD----TSPILN---KQYNCAVVGNSGILTGSRGCP
Tetnig_3      IVFSIGENFRSLLPE----VSPIRQ---KHYNCAVVGNSGILTGSRGCG
Squaca_3      VVFSVSNFSRSLLE----VPPILK---MHYNTCAVVGNSGILTGSGCGA
Perfla_3      IVFSIGENFHSLLPA----VSPILN---KHYNCAVVGNSGILTGSRGCA
Salsal_3      IVFSIGENFRSLLPE----ASPIVN---KHYNCAVVGNSGILTGSRGCP
Serlaldor_3   IVFSIGENFRSLLPE----ASPILN---KHYNCAVVGNSGILTGSRGCP
Treber_3      IVFSISNNLKSLLPD----TSPIRN---KHYSMCAVVGNSGILTGSHCGP
Cynsem_3      IVFSIGENFRSLLPE----VSPIVN---KHYNCAVVGNSGILTGSRGCP
Paroli_3      IVFSISNNFRSLLPD----ASPVLN---KHYSVCAVVGNSGILTGSHCGP
Paroli_3b     IVFSIGENFRSLLPD----ASPILN---KHYNCAVVGNSGILTGSRGCP
Plaste_3      IVFSISNNFRSLLPD----ASPLLN---KHYSVCAVVGNSGILTGSHCGP
Plaste_3b     IVFSIGENFRSLLPE----ASPILN---KHYNCAVVGNSGILTGSRGCP
Erpcal3       VVFSISNNFRSLLPD----ASPVLN---KHYNCAVVGNSGILTGSRGCP
Calmil_3b     VVFSISNNFRMLLPE----VSPLLK---MHYNTCAVVGNSGILRGSRGCD
Hetzeb_3      IVFSVSNFSRSLLE----VPPILK---MHYNTCAVVGNSGILIGSRGCA
Latcha_3      VVFSISNHFKSLLPD----VSPILN---KCYNICAVVGNSGILTDSQCGA
Anates_3      IVFSIGENFRSLLPE----ASPILN---KHYNCAVVGNSGILTGSRGCP
Ampcit3       IVFSISENFRSLLPE----VSPILN---KHYNCAVVGNSGILTGSRGCP
Auslim_3      IVFSIGENFRSLLPE----ASPILN---KRYNCAVVGNSGILTGSRGCA
Cypvar_3      IVFSIGENFRSLLPE----VSPILN---KQYNCAVVGNSGILTGSRGCA
Krymar_3      IVFSIGENFRSLLPE----VSPILD---KHYNCAVVGNSGILTGSRGCA
Funhet_3      IVFSIGENFRSLLPE----ASPVLN---KRYNCAVVGNSGILTGSRGCA
Gamaff3       IVFSIGDNFRSLLPD----VSPILN---MRYNCAVVGNSGILTGSRGCA
Orylat_3      MVFSIGENFRSLLPE----VSPILN---RHYNCAVVGNSGILTGLCGA
Orenil_3      IVFSIGENFRSLLPE----VSPILN---KHYNCAVVGNSGILTGSRGCP
Mayzeb_3      IVFSISDNFRSLLPE----VSPILN---KHYNCAVVGNSGILTGSRGCP
Punnye_3      IVFSISDNFRSLLPE----VSPILN---KHYNCAVVGNSGILTGSRGCP
Punnye_3a     IVFSISDNFRSLLPE----VSPILN---KHYNCAVVGNSGILTGSRGCP
Neobri_3      IVFSIGENFRSLLPE----VSPILN---KHYNCAVVGNSGILTGSRGCP
Misang_3      VVFSIGENLRSLLPD----SSPIIN---KRYNTCAVVGNSGILTGSRGCP
Sinrhi3       IVFSIGENLRSLLPD----SSPVLN---KHFNTCAVVGNSGILTGSRGCA
Singra_3      VVFSIGENLRSLLPD----SSPVLN---KRFNSCAVVGNSGILTGSRGCT
Hapbur_3      IVFSISDNFRSLLPE----VSPILN---KHYNCAVVGNSGILTGSRGCP
Astcal_3      IVFSISDNFRSLLPE----VSPILN---KHYNCAVVGNSGILTGSRGCP
Notfur_3      IVFSIGENFRSLLPN----VSPILN---KHYNCAVVGNSGILTGSRGCT
Cypcar_3      YVFSIGENLRSLLPD----SSPVLN---KRFNSCAVVGNSGILTGSRGCA
Poefor3       IVFSIGENFRSLLPE----VSPVLN---KRYNICAVVGNSGILTGSRGCA
Poelat_3      IVFSIGENFRSLLPE----VSPVLN---KRYNICAVVGNSGILTGSRGCA
Poeret_3      IVFSIGENFRSLLPE----VSPVLN---KRYNCAVVGNSGILTGSRGCA
Angang_3      VVFSIGENLMSLLPE----SSPIVPE---RRFNVCALVGNISGILTGSRGCP
Xipmac_3      IVFSIGENFRSLLPE----VSPVLN---KRYNCAVVGNSGILTGSRGCA
Masarm_3      IVFSIGENFYSLVPE----VSPILN---KHYNICAIIGNSGILSGSRGCS
Permag_3      VVYSIGENFYSLLE----ASPILH---RHYKRCVVGNSGILTGSKCGT
Gnapet3       VVFSISSNFKSLLPE----SSPIQN---KHYNCAVVGNSGILTGSSCGP
Ostbic_3      VVFSVSSFRSLLPD----SSPIEK---KHYNCAVVGNSGILTGSSCGP
Gadmor_3      IVFSIGQNFHSLLE----ASPILN---KHYNCAVVGNSGILTGSKCGP
ScIfor_3      VVFSVSGSFRSLLPD----SSPVEK---KHYNCAVVGNGGILTGSSCGP
Acapol3       IVFSIGENFRSLLPD----VSPILN---KHYNCAVVGNSGILTGSRGCP
Ampoce_3      IVFSIGENFRSLLPD----VSPILN---KHYNCAVVGNSGILTGSRGCP
ScIfor_3b     VVFAISNNFKSLLPV----TSPIQN---KHYNTCAVVGNSGILTSSHCHG
Ostbic_3b     VVFAISNNFKSLLPE----TSPIQN---KHYNTCAVVGNSGILTSSHCHG
Parkin_3      VVFSISSNFKSLLPE----SSPIQN---KHYNCAVVGNSGILTGSSCHG
Ampper3       IVFSIGENFRSLLPD----VSPILN---KHYNCAVVGNSGILTGSRGCP
Oncmyk_3      IVFSIGENFKSLLPE----ASPIVN---KHYNCAVVGNSGILTGSRGCP
Gasacu_3      IVFSIGENFRSLLPE----VSPILN---KHYNCAVVGNSGILTGSRGCP

```



|             |                                                     |
|-------------|-----------------------------------------------------|
| Labber_3    | IVFSIGENFRSLLPE----VSPILN---KHYNVCavgvngsgiltgsrcgp |
| Panbuc_3    | VVFSISSFRSLLPD----HSPILN---KHYNTCAVVGNSGILIGSRCGP   |
| Parhas3     | VVFSIGENFRSLLPD----SSPVLN---KRYNTCAVVGNSGILTGSRCGA  |
| Cluhar_3    | VVFSIGENFRSLLPE----LSPILN---KRYNTCAVVGNSGILTGSRCP   |
| Aloalo_3    | VVFSIGENFRSLLPE----ISPILN---KRYNTCAVVGNSGILTGSRCP   |
| Panhyp_3    | VVFSIGENFRSLLPD----SSPILN---KRYNTCAVVGNSGILTGSRCGA  |
| Eleele_3    | VVFSIGENFRSLLPD----SSPILN---KLYNTCAVVGNSGILTGSRCGA  |
| Denclu_3    | IVFSIGENFKSLLPE----TSPVMN---KLYNTCAVVGNSGILMGSRCP   |
| Sarpil_3    | VVFSIGENLRSLLPE----ISPILN---KRYNTCAVVGNSGILTGSRCP   |
| Eigvir_3    | VVFSIGENFRSLLPD----SSPILN---KRYNTCAVVGNSGILTDSRCGS  |
| Aptalb_3    | VVFSIGENFRSLLPD----SSPVLN---KRYNTCAVVGNSGILTGSRCGA  |
| Sinans_3    | VVFSIGENLRSLLPD----SSPVLN---RRFNTCAVVGNSGILTGSRCGA  |
| Pygnat_3    | VVFSIGENFRSLLPD----SSPILN---KRYNTCAVIGNSGILTGSRCP   |
| Astmex_3    | IVFSIGENFRSLLPD----SSPVLN---KRYNTCAVVGNSGILTGSRCP   |
| Caraur_3    | VVFSIGENFRSLLPD----SSPVLN---KRFNSCAVVGNSGILTGSRCGA  |
| Danrer_3    | VVFSIGENLRSLLPD----ASPVLN---KRYNTCAVVGNSGILTGSRCP   |
| Ictpun_3    | YVFSIGENFRSLLPD----SSPILN---KRYNTCAVVGNSGILTGSRCGA  |
| Plealt_3    | YVFSIGENFKSLLPE----ASPVVN---KHYNVCavgvngsgiltgsrcga |
| Plealt_9    | YVFSISNFKSLLPE----TSPILN---KHYNVCavgvngsgiltgshcgs  |
| Gasacu_9    | IVFSISNNLKSLLPD----ASPIRN---KHYSVCAVVGNSGILTGSHCGP  |
| Parkin_9    | VVFAISGNFKSLLPD----SSPILN---KHYNMCavgvngsgiltgsrcgp |
| Acapol_9    | IVFSISNFKSLLPE----TSPIHN---KHYSMCAVVGNSGILTGSHCGP   |
| Larcro_9    | IVFSISNFKSLLPE----TSPIHN---KHYSICSVVGNSGILTGSHCGP   |
| Notcor_9    | IVFSISNNLKSLLPD----TSPIRN---KHYSMCAVVGNSGILTGSHCGP  |
| Latcal_9    | IVFSISNFKSLLPD----TSPILN---KHYSMCAVVGNSGILTGSHCGP   |
| Serlaldor_9 | IVFSISNFKSLLPD----TSPILN---KHYSMCAVVGNSGILTGSHCGP   |
| Monalb_9    | IVFSISNFKSLLPD----TSPILN---KHYSMCAVVGNSGILTGSHCGP   |
| Serdum_9    | IVFSISNFKSLLPD----TSPILN---KHYSMCAVVGNSGILTGSHCGP   |
| Perflu_9    | IVFSISNNLKSLLPD----TSPIHN---KHYSMCAVVGNSGILTGSHCGP  |
| Perfla_9    | IVFSISNNLKSLLPD----TSPIHN---KHYSMCAVVGNSGILTGSHCGP  |
| Stepar_9    | IVFSISNFKSLLPE----TSPIHN---KHYSVCAVVGNSGILTGSHCGP   |
| Molmol_9    | IVFSISNFKSLLPD----TSPIRN---KHYSICSVVGNSGILTGSHCGP   |
| Hipcom_9    | IVFSISNFKSLLPD----ASPILD---KHGTCavgvngsgiltgshcgs   |
| Takrub_9 B  | IVFSISNFKSLLPD----TSPIHN---KHYSLCSVVGNSGILTGSHCGD   |
| Takrub_9    | IVFSISNFKSLLPD----TSPIHN---KHYSLCSVVGNSGILTGSHCGA   |
| Cynsem_9    | IVFSISNFKSLLPD----ISPILN---KHYSMCAVVGNSGILTGSHCGP   |
| Scomax_9    | IVFSISNNLKSLLPD----ISPILN---KHYSVCAVVGNSGILTGSHCGP  |
| Corlav_9    | VVFSISNNLKSLLPD----ASPIQN---KHYNVCavgvngsgiltgshcgp |
| Oncmky_9    | VVFSISNFKSLLPD----ASPIQN---KHYNVCavgvngsgiltgshcgp  |
| Salsal_9    | VVFSISNNLKSLLPD----ASPIQN---KHYNVCavgvngsgiltgshcgp |
| Onctsh_9    | VVFSISNNLKSLLPD----ASPIQN---KHYNVCavgvngsgiltgshcgp |
| Salalp_9    | VVFSISNNLKSLLPD----ASPIQN---KHYNVCavgvngsgiltgshcgp |
| Ampoce_9    | IVFSISNFKSLLPE----TSPIHN---KHYSMCAVVGNSGILTGSHCGP   |
| Amppe9      | IVFSISNFKSLLPE----TSPIHN---KHYSMCAVVGNSGILTGSHCGP   |
| Labber_9    | IVFSISNFKSLLPD----TSPIRN---KHYSICSVVGNSGILTGSHCGP   |
| Umbpyg_3B   | IVFSIGENFQSLLE----VSPIVD---KHYNVCavgvngsgiltgsrcgp  |
| Esoluc_3b   | VVFSIGENFKSLLPE----ASPIAN---KHYNVCavgvngsgiltgsrcgp |
| Gadmor_9    | IVFSISNNFKSLLPD----MSPIYN---KHYNVCavgvngsgiltgsrcgn |
| Umbpyg_9    | VVFSISNNLKSLLPD----ASPIQN---KHYNVCavgvngsgiltgshcgp |
| Esoluc_9    | VVFSISNNLKSLLPD----ASPIQN---KHYNVCavgvngsgiltgshcgp |
| Permag_9    | IVFSISNFKSLLPD----TSPILN---KHYSVCSVVGNSGILTDSHCGP   |
| Bolpec_9    | IVFSISNNFKSLLPD----TSPILN---KHYSVCSVVGNSGILTDSHCGP  |
| Poefor9     | IVFSISNFKSLLPE----ASPILN---KHYSTCAVVGNSGILTGSHCGP   |
| Masarm_9    | IVFSISNFKSLLPD----TSPILN---KHYSMCAVVGNSGILTGSHCGP   |
| Angjap_9    | VVFSIGENFMSLLPE----SSPIVPE---RRFNVCALVNGSGVLTGSRCP  |
| Poelat_9    | IVFSISNFKSLLPE----ASPILN---KHYSTCAVVGNSGILTGSHCGP   |
| Poeret_9    | IVFSISNFKSLLPE----ASPILN---KHYSTCAVVGNSGILTGSHCGP   |
| Xipmac_9    | IVFSISNFKSLLPD----ASPIRN---KHYSTCAVVGNSGILTGSHCGP   |
| Hapbur_9    | IVFSISNFKSLLPD----TSPILN---KHYSMCAVVGNSGILTGSHCGP   |
| Orylat_9    | IVFSISNFKSLLPE----ISPILN---KHYSVCAVVGNSGILTGSHCGP   |
| Gamaff_9    | IVFSISNFKSLLPD----ASPIRN---KHYSTCAVVGNSGILTGSHCGP   |
| Neobri_9    | IVFSISNFKSLLPD----TSPILN---KHYSMCAVVGNSGILTGSHCGP   |
| Funhet_9    | IVFSISNFKSLLPE----TSPILN---KHYSTCAVVGNSGILTGSHCGP   |
| Punnye_9    | IVFSISNFKSLLPD----TSPILN---KHYSMCAVVGNSGILTGSHCGP   |
| Cypvar_9    | IVFSISNFKSLLPE----TSPILN---KHYSTCAVVGNSGILTGSHCGP   |
| Krymar_9    | IVFSISNFKSLLPD----ISPILN---KHYSMCAVVGNSGILTGSHCGP   |
| Notfur_9    | IVFSISNFKSLLPD----TSPILN---KHYSMCAVVGNSGILTGSHCGP   |
| Notpie_9    | IVFSISNFKSLLPD----TSPILN---KHYSMCAVVGNSGILTGSHCGP   |
| Orenil_9    | IVFSISNFKSLLPD----TSPILN---KHYSMCAVVGNSGILTGSHCGP   |
| Auslim_9    | IVFSISNFKSLLPE----TSPITN---RHYSVCAVVGNSGILTGSHCGP   |
| Anates_9    | IVFSISNFKSLLPD----TSPIHN---KHYSMCAVVGNSGILTGSHCGP   |
| Astcal_9    | IVFSISNFKSLLPD----TSPILN---KHYSMCAVVGNSGILTGSHCGP   |
| Mayzeb_9    | IVFSISNFKSLLPD----TSPILN---KHYSMCAVVGNSGILTGSHCGP   |
| Orymel_9    | IVFSISNFKSLLPD----ISPILN---KHYSVCAVVGNSGILTGSHCGP   |
| Ampcit9     | IVFSISNFKSLLPD----TSPILN---KHYSMCAVVGNSGILTGSHCGP   |
| Macfas_2    | ATMNVSQNLYELLPR----TSPLKN---KHFGTCAIVGNSGVLLNSGCGQ  |
| Macmul_2    | ATMNVSQNLYELLPR----TSPLKN---KHFGTCAIVGNSGVLLNSGCGQ  |

|             |                                                    |
|-------------|----------------------------------------------------|
| Macnem_2    | ATMNVSQNLYELLPR----TSPLKN---KHFGTCAIVGNSGVLLNSGCGQ |
| Musmus_2    | ATMNVSQNLYELLPR----TSPLKN---KHFGTCAIVGNSGVLLNSGCGQ |
| Ponabe_2    | ATMNVSQNLYELLPR----TSPLKN---KHFGTCAIVGNSGVLLNSGCGQ |
| Papanu_2    | ATMNVSQNLYELLPR----TSPLKN---KHFGTCAIVGNSGVLLNSGCGQ |
| Nomleu_2    | ATMNVSQNLYELLPR----TSPLKN---KHFRCAIVGNSGVLLNSGCGQ  |
| Pantro_2    | ATMNVSQNLYELLPR----TSPLKN---KHFGTCAIVGNSGVLLNSGCGQ |
| Latcha_2    | ATMNISQNLKYLLPR----VSPLKN---RHFQCAIVGNSGILLNSNCGR  |
| Gnapet2     | ATMNISDSLYQLLPT----VSPMKN---QHRRCAIVGNSGILLNSSCGP  |
| Panbuc_2b   | ATTNVSENLYQLLPS----VSPLKH---QHYGRCAIVGNSGILLNSSCGQ |
| Ostbic_2    | ATMNVSNELYELLPK----VSPLKN---QFHKRCAIVGNSGILLNSSCGK |
| Sinrhi2     | ATTNISENLYHLLPT----VSPMKN---QHYKQCAIVGNSGILLNSSCGR |
| Hetzeb_2    | ATLNISHSLYELLPR----TSPMKN---KHFKQCAIVGNSGILLNSGCGQ |
| Hipcom_2    | PTTNISENLHRLLPs----VSPLKN---RHYRLCAIVGNSGILLNSSCGS |
| Prigla_2    | ATLNVSHSLYELLPR----ISPMKN---KHYKQCAIVGNSGILLNSGCGQ |
| Scytor_2    | ATLNISHSLYELLPR----TSPMKN---KHFKQCAIVGNSGILLNSGCGQ |
| Tetcal_2    | ATLNISYSLYELLPR----TSPMKN---KHFKQCAIVGNSGILLNSGCGQ |
| Rhityp_2    | ATLNISHSLYELLPR----TSPMKN---KHFKCAIVGNSGILLKSGCGQ  |
| Parkin_2b   | ATTNVSENHALLPT----TSPMKN---RHYQRCAIVGNSGILLNSSCGK  |
| Angang_2    | ATNVNISELYRLLPT----VSPMKD---RHYQRCAIVGNSGILLNSSCGR |
| Pygnat_2    | ATTNISENLYRLLPT----ASPMKN---QHYEQCAIVGNSGILLNSSCGA |
| Parkin_2    | ATMNVASLYQLLPT----VSPMKN---QHHKCAIVGNSGILLNSSCGP   |
| Gorgor_2    | ATMNVSQNLYELLPR----TSPLKN---KHFGTCAIVGNSGVLLNSGCGQ |
| Thegel_2    | ATMNISQNLYELLPR----TSPLKN---KHFGTCAIVGNSGVLLNSGCGQ |
| Tupchi_2    | ATMNVSQNLYELLPR----TSPLKN---KHFRCAIVGNSGVLLNSGCGQ  |
| Galgai_2    | ATMNVSQNLYELLPR----TSPLKG---KQFPSCAIVGNSGVLLGSGCGP |
| Eleele_2    | ATTNISENLYRLLPT----VSPMKN---QHYKCAIVGNSGILLNSSCGP  |
| Danre_2     | ATTNISENLYHLLPT----VSPMKN---QHYKCAIVGNSGILLNSSCGR  |
| CanlupFam_2 | ATMNVSQNLYDLLPR----TSPLKN---KHFRCAIVGNSGVLLNSGCGQ  |
| Aloalo_2    | PTMNVSENLYRLLPT----ASPMKN---QRHKCAIVGNSGILLNSSCGS  |
| Astmex_2    | ATTNISENLYRLLPT----VSPMKN---QHYERCAIVGNSGILLNSSCGP |
| Sinans_2    | ATTNISENLYHLLPT----VSPMKN---QHYKQCAIVGNSGILLNSSCGR |
| Scifor_2    | ATLNVPNELYELLPR----VSPLKN---QFYKCAIVGNSGILLNSSCGQ  |
| Ceraty_2    | ATMNVSQNLYELLPR----TSPLKN---KHFGTCAIVGNSGVLLNSGCGQ |
| Anocar_2    | ATMNVSQNLYALLPR----TSPLKG---KHFRCAIVGNSGILLNSGCGE  |
| Anates_2    | PTTNISENLYRLLPT----VSPMKN---QHRRCAIVGNSGILLNSSCGH  |
| Ampbic_2    | PTTNISENLYRLLPT----VSPMKN---QHRRCAIVGNSGILLNSSCGL  |
| Sarpil_2    | PTMNVSENLYSLPT----ASPMKN---QHHKCAIVGNSGILLNSSCGS   |
| Xenlae_2    | ATMNISKNLYELLPR----TSPLKN---KHFKTCAIVGNSGILLNSGCGK |
| Cluhar_2    | PTMNVSENLYRLLPT----ASPMKN---QHHKCAIVGNSGILLNSSCGP  |
| Cypcar_2    | ATTNISENLYNLLPT----VSPMKN---QHYKQCAIVGNSGILLNSSCGR |
| Denclu_2    | ATTNISENLYRLLPT----ASPMKN---QHRLCAIVGNSGILLNSSCGP  |
| Notpie_2    | PTTNISENLYRLLPT----ASPMKN---QHRRCAIVGNSGILLNSSCGP  |
| Ercal2      | ATMNISKSLYQLIPK----QSPLKG---QHFQKCAIVGNSGVLLNSGCGK |
| Amical_2    | ATTNISETLYQLIPK----VSPMKQ---QHYRCAIVGNSGILLNSRCGE  |
| Lepocu_2    | ATMNVSETLYQLIPK----VSPMKK---QHYRQCAIVGNSGILLKSRCGA |
| Homsap_2    | ATMNVSQNLYELLPR----TSPLKN---KHFGTCAIVGNSGVLLNSGCGQ |
| Bostau_2    | ATMNVSQNLYELLPR----TSPLKN---KHFGTCAIVGNSGVLLNSGCGQ |
| Caraur_2    | ATTNISENLYNLLPT----VSPMKN---RHYKQCAIVGNSGILLNSSCGR |
| Thythy_2B   | PTTNISENLYRLLPT----TSPMKN---QYHRRCAIVGNSGVLLNSSCGP |
| Onctsh_2B   | PTTNISENLYQLLPT----ASPMKN---QHRRCAIIGNSGILLNSSCGP  |
| Salsal_2B   | PTTNISENLYQLLPT----VSPMKN---QYHRRCAIIGNSGILLNSSCGP |
| Oncmyk_2B   | PTTNISENLYQLLPT----ASPMKN---QHRRCAIIGNSGILLNSSCGP  |
| Onckis_2B   | PTTNISENLYQLLPT----ASPMKN---QHRRCAIIGNSGILLNSSCGP  |
| Salsal_2A   | PTTNISENLYRLLPT----ASPMKN---QHRRCAIVGNSGILLNSSCGP  |
| Thythy_2A   | PTTNISENLYRLLPT----ASPMKN---QHRRCAIVGNSGILLNSSCGP  |
| Salalp_2A   | PTTNISENLYRLLPT----ASPMKN---QHRRCAIVGNSGILLNSSCGP  |
| Corlav_2A   | PTTNISENLYRLLPT----ASPMKN---QHRRCAIVGNSGILLNSSCGP  |
| Cormar_2A   | PTTNISENLYRLLPT----ASPMKN---QHRRCAIVGNSGILLNSSCGP  |
| Onctsh_2A   | PTTNISENLYRLLPT----ASPMKN---QHRRCAIVGNSGILLNSSCGP  |
| Oncmyk_2A   | PTTNISENLYQLLPT----ASPMKN---QHRRCAIVGNSGIQLNSSCGP  |
| Neobri_2    | PTTNISENLYRLLPT----VSPMKN---QHYRCAIVGNSGILLNSSCGP  |
| Takrub_2    | PTTNVSETLYHFLPT----VSPMKN---QHRRCAIVGNSGILLNSSCGP  |
| Tetnig_2    | PTTNISETLYHFLPS----VSPMKN---QHRRCAIVGNSGVLLNSSCGP  |
| Orenil_2    | PTTNISENLYRLLPT----ISPMKN---QHYRCAIVGNSGILLNSSCGP  |
| Orylat_2    | PTTNISENLYRLLPT----VSPMKN---QHRRCAIVGNSGILLNSSCGS  |
| Krymar_2    | PTTNISENLYRLLPT----ASPMRR---QHRRCAIVGNSGVLLNSSCGP  |
| Notfur_2    | PTTNISENLYRLLPT----ASPMKN---QHRRCAIVGNSGILLNSSCGP  |
| Poelat_2    | PTTNISENLYRLLPT----ASPMKN---QYHRRCAIVGNSGILLNSSCGP |
| Gadmor_2    | PTTNISENLYRLLPT----VSPMRN---QHRRCAIVGNSGILLNSSCGQ  |
| Xipmac_2    | PTTNISENLYRLLPT----ASPMKN---QYHRRCAIVGNSGILLNSSCGP |
| Poeret_2    | PTTNISENLYRLLPT----ASPMKN---QYHRRCAIVGNSGILLNSSCGS |
| Astcal_2    | PTTNISENLYRLLPT----VSPMKN---QHYRCAIVGNSGILLNSSCGP  |
| Hapbur_2    | PTTNISENLYRLLPT----VSPMKN---QHYRCAIVGNSGILLNSSCGP  |
| Acapol_2B   | PTTNISENLYRLLPT----VSPMKN---QHRRCAIVGNSGILLNSSCGL  |
| Ampoce_2A   | PTTNISENLYRLLPT----VSPMKN---QHRRCAIVGNSGILLNSSCGL  |
| Acapol_2A   | PTTNISENLYRLLPT----VSPMKN---QHRRCAIVGNSGILLNSSCGL  |
| Mayzeb_2    | PTTNISENLYRLLPT----VSPMKN---QHYRCAIVGNSGILLNSSCGP  |

|             |                                                     |
|-------------|-----------------------------------------------------|
| Punnye_2    | PTTNISENLYRLLPT----VSPMKN---QHYRRCaIVGNSGILLNSSCGP  |
| Latcal_2    | PTTNISENLYRLLPT----VSPMKN---QHRRRCaIVGNSGILLNSSCGP  |
| Singra_2    | ATTNISENLYHLLPT----VSPMKN---QHYKQCaIVGNSGILLNSSCGR  |
| Auslim_2    | PTTNVSENLYRLLPT----VSPLKH---QHRRSCaIVGNSGVLLNSSCGP  |
| Monalb2     | PTTNISENLYRLLPT----VSPMKN---QHX-----TGKK----NSSCGP  |
| Ampoce_2B   | PTTNISENLYRLLPT----VSPMKN---QHRRRCaIVGNSGILLNSSCGL  |
| Chiham_2    | PTTNISENLYRLLPT----VSPMKN---QHHKRCaIVGNSGILLNSSCGP  |
| Gasacu_2    | PTTNVSENLYRLLPT----ASPMKN---QHRRRCaIVGNSGILLNSSCGP  |
| Gymacu_2    | PTTNISENLYRLLPT----VSPMKN---QHHKRCaIVGNSGILLNSSCGP  |
| Labber_2    | PTTNISENLYRLLPT----ASPLKN---QHRRRCaIVGNSGILLNSSCGP  |
| Cypvar_2    | PTTNISENLYRLLPT----ASPLKN---QYHKRCaIVGNSGILLNSSCGP  |
| Funhet_2    | PTTNISEDLYRLLPT----ASPMKN---QYHRRCaIVGNSGILLNSSCGP  |
| Larcro_2    | PTTNISQNLyRLLPT----VSPMKN---QHRRRCaIVGNSGILLNSSCGS  |
| Paroli_2    | PTTNISENLYRLLPT----VSPMKN---QHRRRCaIVGNSGILLNSSCGH  |
| Perflu_2    | PTTNISENLYRLLPT----VSPMKN---QHRRRCaIVGNSGILLNSSCGP  |
| Serdum_2    | PTTNISENLYRLLPT----VSPMKN---QHRRRCaIVGNSGILLNSSCGP  |
| Stepar_2    | PTTNISENLYRLLPT----VSPMKN---QHRRRCaIVGNSGILLNSSCGL  |
| Notcor_2    | PTTNISENLYRLLPT----VSPMKN---QHHKRCaIVGNSGILLNSSCGP  |
| Treber_2    | PTTNISENLYRLLPT----VSPMKN---QHHKRCaIVGNSGILLNSSCGP  |
| Serlaldor_2 | PTTNISENLYRLLPT----ISPMKN---QHRRRCaIVGNSGILLNSSCGP  |
| Plaste_2    | PTTNISENLYRLLPT----VSPMKN---QHRRRCaIVGNSGVLLNSSCGQ  |
| Clabat_4    | ATLNVSHTLHSLLPD----VSPLKN---KRFKTCaVVGNSGVLLKSGCGK  |
| Ictpun_4A   | ATLNVSHTLHSLLPD----VSPLKN---KRFKTCaVVGNSGVLLKSGCGK  |
| Panhyp_4    | ATLNVSHTLHSLLPD----VSPLKN---KRFKTCaVVGNSGVLLKSGCGK  |
| Umbpyg_4    | ATLNVSHTLHSLLPD----VSPLKN---KRFKTCaVVGNSGVLLRSGCGR  |
| Esoluc_4    | ATLNVSRTLHSLLPD----VSPLKN---KRFKTCaVVGNSGVLLNSGCGR  |
| Plealt_4    | ATLNVSQTLHSLLPD----VSPLKN---KRFNTCaVVGNSGVLLNSSCGK  |
| Onckis_4B   | ATLNVSHTLHSLLPD----VSPLKN---KRFKTCaVVGNSGVLLNSGCGK  |
| Onckis_4A   | ATLNVSHTLHSLLPD----VSPLKN---KRFKTCaVVGNSGVLLNSGCGK  |
| Onctsh_4    | ATLNVSHTLHSLLPD----VSPLKN---KRFKTCaVVGNSGVLLNSGCGK  |
| Oncmk_4     | ATLNVSHTLHSLLPD----VSPLKN---KRFKTCaVVGNSGVLLNSGCGK  |
| Corlav_4    | ATLNVSHTLHSLLPD----VSPLKN---KRFKTCaVVGNSGVLLNSGCGK  |
| Astmex_4A   | ATLNVSHTLHSLLPD----VSPLKN---KRFKTCaVVGNSGVLLKSGCGK  |
| Pygnat_4    | ATLNVSHTLHSLLPD----VSPLKN---KRFKTCaVVGNSGILLKSGCGK  |
| Aloalo_4    | ATLNVSQTLHKLLPE----VSPLKN---RRFKTCaVVGNSGVLLSSGCGQ  |
| Cluhar_4    | ATLNVSQTLHKLLPE----VSPLKN---RRFKTCaVVGNSGVLLSSGCGH  |
| Denclu_4    | ATLNVSRTLHNLPE----VSPLKN---RRFKTCaVVGNSGILLNSGCGR   |
| Konpun4     | ATLNVSQTLHKLLPE----VSPLKN---RRFKTCaVVGNSGVLLNSGCGQ  |
| Sarpil_4    | ATLNVSQTLHKLLPE----VSPLKN---RRFKTCaVVGNSGVLLSSGCGQ  |
| Caraur_4    | ATFNISQTLHSLLPD----VSPMKN---KTFKTCaVVGNSGVLLKSGCGK  |
| Cteide_4    | ATFNVSHTLHSLLPD----VSPLKN---KMFKTCaVVGNSGILLKSGCGK  |
| Petmar_4    | ATTNVSHSLHALLPT----APPLRG---GRYGSCaVVGNSGILEGSACGE  |
| Cypcar_4    | ATFNISQTLHSLLPD----VSPLKN---KTFKTCaVVGNSGVLLKSRGCGK |
| Danrer_4    | ATFSVSQTLHSLLPD----VSPLKN---KTFKTCaVVGNSGILLKSGCGK  |
| Misang_4    | ATFNVTHTLHSLLPD----VSPLKN---KFKTCaVVGNSGILLKSRGCGK  |
| Angjap_4    | ATLNVSRALHSLLPD----VSPMKN---RRFKTCaVVGNSGVLLNSGCGP  |
| Cypcar_4A   | ATFNISQTLHSLLPD----VSPLKN---KTFKTCaVVGNSGVLLKSRGCGK |
| Angang_4    | ATLNVSRALHSLLPD----VSPMKN---RRFKTCaVVGNSGVLLNSGCGR  |
| Cypcar_4B   | ATFNVSQTLHSLLPD----VSPLKN---KTFKTCaVVGNSGVLLKSGCGK  |
| Sinans_4A   | VTFNISQTLHSLLPD----VSPLKN---KTFKTCaIVGNSGILLKSRGCGK |
| Sinans_4B   | ATFNVSQTLHSLLPD----VSPLKN---KTFKTCaVVGNSGVLLKSGCGK  |
| Singra_4A   | ATFNISQTLHSLLPD----VSPLKN---KTFKTCaVVGNSGILLKSRGCGK |
| Aptalb_4    | AKLSVSHTLHSLLPD----VSPLKN---RRFKTCaVVGNSGVLLKSGCGK  |
| Elgvir_4    | ATLNVSHTLHSLLPD----VSPLKN---KRFGTCaVVGNSGVLLKSGCGK  |
| Eleele_4    | ATLNVSHTLHSLLPD----VSPLKN---KRFKTCaVVGNSGVLLKSGCGK  |
| Parhas_4    | AKLNVSHTLHSLLPD----VSPLKN---RRFKTCaVVGNSGVLLKSGCGK  |
| Scifor_4    | ATLSISQSLHSLLPD----VSPMKN---RRFKTCaVVGNSGILLKSGCGK  |
| Gnapet4     | ATLNVSHTLHSLLPD----TSPMKN---RRFKTCaVVGNSGVLLNSGCGK  |
| Ostbic_4    | ATLTISQTLHSLLPD----VSPLKN---KRFKTCaVVGNSGILLNSGCGK  |
| Parkin_4    | ATLNVSHTLHSLLPD----ASPMKN---RRFKTCaVVGNSGVLLNSGCGK  |
| Panbuc_4    | ATFNVSHTLHSLLPD----VSPMKN---KRFKTCaVVGNSGVLLNSGCGR  |
| Erpcal4     | ATLNVSHTLHSLLPD----VSPLKN---KRFKTCaVVGNSGVLLNSGCGK  |
| Salsal_4    | ATLNVSHTLHSLLPD----VSPLKN---KRFKTCaVVGNSGVLLNSGCGK  |
| Saltru_4    | ATLNVSHTLHSLLPD----VSPLKN---KRFKTCaVVGNSGVLLNSGCGK  |
| Salalp_4    | ATLNVSHTLHSLLPD----VSPLKN---KRFKTCaVVGNSGVLLNSGCGK  |
| Salfon_4    | ATLNVSHTLHSLLPD----VSPLKN---KRFKTCaVVGNSGVLLNSGCGK  |
| Thythy_4    | ATLNVSHTLHSLLPD----VSPLKN---KRFKTCaVVGNSGVLLHSGCGK  |
| Calmil_4    | ATLNVSRNLHSLLPD----VSPMKN---KRFNACaVVGNSGILLGSGCGK  |
| Hetzeb_4    | ATLNVSRNLHSLLPD----VSPMKN---KRFSTCaVVGNSGILLGSGCGK  |
| Rhityp_4    | ATLNVSRNLHSLLPD----VSPMKN---KRFSSCaVVGNSGILLGSGCGK  |
| Scytor_4    | ATLNVSRNLHSLLPD----VSPMKN---KRFSTCaVVGNSGILLGSGCGK  |
| Squaca_4    | ATLNVSRNLHSLLPD----VSPMKN---KRFSTCaVVGNSGILLGSGCGK  |
| Amical_4    | ATLNVSRNLHSLLPD----VSPMKN---RRFKTCaVVGNSGILLNSGCGR  |
| Lepocu_4    | ATLNVSRNLHSLLPD----VSPMKN---RRFKTCaVVGNSGILLNSGCGK  |
| Agema_4     | ATLNVSHTLHSLLPD----VSPLKN---KRFKTCaVVGNSGVLLKSGCGK  |
| Anocar_4    | ATLNVSRNLHSLLPD----VSPMKN---RRFKMCAVVGNSGILLDSGCGK  |
| Canlupfam_4 | ATLNVSRNLHSLLPD----VSPMKN---RRFKTCaVVGNSGILLDSECGK  |

|              |                                                     |
|--------------|-----------------------------------------------------|
| Crigri_4     | ATLNISHDLHSLLEPE----VSPMKN---RRFKTCAVVGNSGILLDSGCGK |
| Galgai_4     | ATLNISQDLHSLLEPE----VSPMKN---RRFKTCAVVGNSGILLDSGCGK |
| Mesaur_4     | ATLNISHDLHSLLEPE----VSPMKN---RRFKTCAVVGNSGILLDSECGK |
| Homsap_4     | ATLNISHDLHSLLEPE----VSPMKN---RRFKTCAVVGNSGILLDSECGK |
| Notscuscu_4  | ATLNISQDLHSLLEPE----VSPMKN---RRFKTCAVVGNSGILLDSGCGK |
| Psetextex_4  | ATLNISQDLHSLLEPE----VSPMKN---RRFKTCAVVGNSGILLDSGCGK |
| Musmus_4     | ATLNISHDLHSLLEPE----VSPMKN---RRFKTCAVVGNSGILLDSGCGK |
| Pogvit_4     | ATLNISQDLHRLLEPE----VSPMKN---RRFKTCAVVGNSGILLDSGCGK |
| Promuc_4     | ATLNISQDLHSLLEPE----VSPMKN---RRFKTCAVVGNSGILLDSGCGK |
| Pantro_4     | ATLNISHDLHSLLEPE----VSPMKN---RRFKTCAVVGNSGILLDSECGK |
| Pytbiv_4     | ATLNISQDLHSLLEPE----VSPMKN---RRFKTCAVVGNSGILLDSGCGK |
| Ratnor_2     | ATMNVSQNLLEYLLPR----TSPLKN---KHFKTCAIVGNSGVLLNSGCGQ |
| Ratnor_4     | ATLNISHDLHSLLEPE----VSPMKN---RRFKTCAVVGNSGILLDSGCGK |
| Siltro_2     | ATMNIKSNLEYLLPR----TSPLKN---KHFKTCAIVGNSGILLNSGCGK  |
| Siltro_4     | ATLNISQNLHSLLEPE----VSPMKS---RRFRTCAVVGNSGILLNSGCGK |
| Susscr_4     | ATLNISQDLHSLLEPE----VSPMKN---RRFKTCAVVGNSGILLDSECGK |
| Taegut_4     | ATLNISQDLHSLLEPE----VSPMKN---RRFKTCAVVGNSGILLNSGCGK |
| Termextri_4M | ATLNISQDLHSLLEPE----VSPMKN---RRFKTCAVVGNSGILLDSACGK |
| Thasirsir_4  | ATLNISQDLHRLLEPE----VSPMKN---RRFKACAVVGNSGILLDSGCGK |
| Xenlae_4B    | ATLNISQNLHSLLEPE----VSPMKS---RRFRTCAVVGNSGILLNSGCGN |
| Xenlae_4A    | ATLNISQNLHSLLEPE----VSPMKS---RRFRTCAVVGNSGILLSSGCGK |
|              | 51                                                  |
| Latcal_3     | QIEKFDFVFR--CNFAP-TEIFKKDVGRRTNMETFN-PSILEKYNNLLT   |
| Perflu_3     | QIEKFDFVFR--CNFAP-TEIFKKDVGRRTNMETFN-PSILEKYNNLLT   |
| Serdum_3     | QIEKFDFVFR--CNFAP-TEIFKKDVGRRTNMETFN-PSILEKYNNLLT   |
| Stepar_3     | QIEKFDFVFR--CNFAP-TEIFKKDVGRRTNMETFN-PSILEKYNNLLT   |
| Tetcal_3     | DIDKSDFVFR--CNFAP-TETTFENDVGRKTNLTFN-PSILEKYNNLLT   |
| Monalb_3     | QIEKFDFVFR--CNFAP-TEVFKKDVGRRTNMETFN-PSILEKYNNLLT   |
| Molmol_3     | QIEKFDFVLR--CNFAP-TEIFKKDVGRRTNMETFN-PSILEKYNNLLT   |
| Takrub_3     | QIDRFDFVFR--CNFAP-TEIFKKDVGRRTNMETFN-PSILEKYNNLLT   |
| Canlupfam_3  | EIDKSDFVFR--CNFAP-TEAFQRDVGRKTNLTFN-PSILEKYNNLLT    |
| Bostau_3     | QIDKSDFVFR--CNFAP-TEAFQRDVGRKTNLTFN-PSILEKYNNLLT    |
| Homsap_3     | EIDKSDFVFR--CNFAP-SEAFQRDVGRKTNLTFN-PSILEKYNNLLT    |
| Siltro_3     | EIDKADFVFR--CNFAP-TEGFQKDVGRKTNLTFN-PSILEKYNNLLT    |
| Anocar_3     | EIDKYDFVFR--CNFAP-TEAFHKDVGRKTNLTFN-PSILEKYNNLLT    |
| Musmus_3     | EIDKSDFVSR--CNFAP-TEAFHKDVGRKTNLTFN-PSILEKYNNLLT    |
| Pantro_3     | EIDKSDFVFR--CNFAP-TEAFQRDVGRKTNLTFN-PSILEKYNNLLT    |
| Ratnor_3     | EIDKSDFVFR--CNFAP-TEAFHKDVGRKTNLTFN-PSILEKYNNLLT    |
| Galgai_3     | EIDKSDFVFR--CNFAP-TEAFQKDVGRKTNLTFN-PSILEKYNNLLT    |
| Lepocu_3     | EIDKSDFIFR--CNFAP-TEIFHKDVGRKTNLTFN-PSILEKYNNLLT    |
| Tetnig_3     | EIDSLDFVFR--CNFAP-TELFKKDVGRRTNMETFN-PSILEKYNNLLT   |
| Squaca_3     | EIDKSDFVFR--CNFAP-TETFEKDVGRKTNLTFN-PSILEKYNNLLT    |
| Perfla_3     | QIEKFDFVFR--CNFAP-TEIFKKDVGRRTNMETFN-PSILEKYNNLLT   |
| Salsal_3     | EIEKFDFVFR--CNFAP-TEIFRRDVGRRTNLTFN-PSILEKYNNLLT    |
| Serlaldor_3  | QIEKFDFVFR--CNFAP-TEIFKKDVGRRTNMETFN-PSILEKYNNLLT   |
| Treber_3     | EIDQADFVFR--CNFAP-TEIYSKDVGRKTNLTFN-PSILERYNNLLT    |
| Cynsem_3     | QIEKFDFVFR--CNFAP-TEVFKKDVGRRTNMETFN-PSILEKYNNLLT   |
| Paroli_3     | EIDQADFVFR--CNFAP-TEVYSKDVGRKTNLTFN-PSILERYNNLLT    |
| Paroli_3b    | QIEKFDFVFR--CNFAP-TEIFKKDVGRRTNMETFN-PSILEKYNNLLT   |
| Plaste_3     | EIDQADFVFR--CNFAP-TEVYSKDVGRKTNLTFN-PSILERYNNLLT    |
| Plaste_3b    | QIEKFDFVFR--CNFAP-TELFKKDVGRQTNMETFN-PSILEKYNNLLT   |
| Erpcal3      | EIDKSDFIFR--CNFAP-TEIFQKDVGRKTNLTFN-PSILEKYNNLLT    |
| Calmil_3b    | SIDKSDFVFR--CNFAP-TEFFEKDVGRKTNLTFN-PSILEKYNNLMA    |
| Hetzeb_3     | DIDKSDFVFR--CNFAP-TESEFEKDVGRKTNLTFN-PSILEKYNNLLT   |
| Latcha_3     | EIDQSDFVFR--CNFAP-TEIFHKDVGRKTNLTFN-PSILEKYNNLLT    |
| Anates_3     | QIEKFDFVFR--CNFAP-TEIFKKDVGRRTNLTFN-PSILEKYNNLLT    |
| Ampcit3      | QIEKYDFVFR--CNFAP-TEIFKKDVGRRTNMETFN-PSILEKYNNLLT   |
| Auslim_3     | HIERDYVFR--CNFAP-TEIFRKDVGRRTNMETFN-PSILEKYNNLLT    |
| Cypvar_3     | QIEKYDFVFR--CNFAP-TEIFKKDVGRRTNMETFN-PSILEKYNNLLT   |
| Krymar_3     | QIEKYDFVFR--CNFAP-TEIFKKDVGRRTNMETFN-PSILEKYNNLLT   |
| Funhet_3     | QIEKYDFVFR--CNFAP-TEIFKKDVGRRTNMETFN-PSILEKYNNLLT   |
| Gamaff3      | QIEKYDFVLR--CNFAP-TEIFKKDVGRRTNMETFN-PSILEKYNNLLT   |
| Orylat_3     | QIEKYDFVFR--CNFAP-TEIFKKDVGRRTNMETFN-PSILEKYNNLLT   |
| Orenil_3     | QIEKYDFVFR--CNFAP-TEIFKKDVGRRTNMETFN-PSILEKYNNLLT   |
| Mayzeb_3     | QIEKYDFVFR--CNFAP-TEIFKKDVGRRTNMETFN-PSILEKYNNLLT   |
| Punnye_3     | QIEKYDFVFR--CNFAP-TEIFKKDVGRRTNMETFN-PSILEKYNNLLT   |
| Punnye_3a    | QIEKYDFVFR--CNFAP-TEIFKKDVGRRTNMETFN-PSILEKYNNLLT   |
| Neobri_3     | QIEKYDFVFR--CNFAP-TEIFKKDVGRRTNMETFN-PSILEKYNNLLT   |
| Misang_3     | EIDKYDFVFR--CNFAP-TEVFRKDVGRRTNLTFN-PSILEKYNNLLT    |
| Sinrhi3      | QIDSYDFVFR--CNFAP-TEVFRDVGRRTNLTFN-PSILEKYNNLLT     |
| Singra_3     | QIDSYDFVFR--CNFAP-TEAFRRDVGRRTNLTFN-PSILEKYNNLLT    |
| Hapbur_3     | QIEKYDFVFR--CNFAP-TEIFKKDVGRRTNMETFN-PSILEKYNNLLT   |
| Astcal_3     | QIEKYDFVFR--CNFAP-TEIFKKDVGRRTNMETFN-PSILEKYNNLLT   |
| Notfur_3     | QIEKYDFVFR--CNFAP-TEIFKKDVGRRTNMETFN-PSILEKYNNLLT   |
| Cypcar_3     | QIDSYDYVFR--CNFAP-TEVFRDVGRRTNLTFN-PSILEKYNNLLT     |
| Poefor3      | QIEKYDFVLR--CNFAP-TEIFKKDVGRRTNMETFN-PSILEKYNNLLT   |
| Poelat_3     | QIEKYDFVLR--CNFAP-TEIFKKDVGRRTNMETFN-PSILEKYNNLLT   |

|             |                                                   |
|-------------|---------------------------------------------------|
| Poeret_3    | QIEKYDFVLR--CNFAP-TEIFKKDVGRRTNMTTFN-PSILEKYNNLLT |
| Angang_3    | EIDRSDFVFR--CNFAP-TEIFHRDVGRRTNLTTFN-PSILEKYNNLLT |
| Xipmac_3    | QIEKYDFVLR--CNFAP-TEIFKKDVGRRTNMTTFN-PSILEKYNNLLT |
| Masarm_3    | QIEKFDFVFR--CNFAP-TEIFKKDVGRRTNMTTFN-PSILEKYNNLLT |
| Permag_3    | QIDSDFVFR--CNFAP-TEVFKKDVGRRTNMTTFN-PSILEKYNNLLT  |
| Gnapet_3    | QIDKSDVFR--CNFAP-TEVFHKDVGHTNLTTFN-PSILEKYNNLLT   |
| Ostbic_3    | RIDSSDFVFR--CNFAP-TELFKKDVGRRTNLTTFN-PSILEKYNNLLT |
| Gadmor_3    | QIEKFDFVFR--CNFAP-TEIFKKDVGRRTNMTTFN-PSILEKYNNLLT |
| ScIfor_3    | RIDGSDVFR--CNFAP-TELFHRDVGRRTNLTTFN-PSILEKYNNLLT  |
| Acapol_3    | QIEKFDFVFR--CNFAP-TEIFKKDVGRRTNMTTFN-PSILEKYNNLLT |
| Ampoce_3    | QIEKFDFVFR--CNFAP-TEIFKKDVGRRTNMTTFN-PSILEKYNNLLT |
| ScIfor_3b   | EIDRFDFVFR--CNFAP-TELFHKDVGHTNITTFN-PSILEKYNNLLT  |
| Ostbic_3b   | EIDRFDFVFR--CNFAP-TELFHKDVGHTNITTFN-PSILEKYNNLLT  |
| Parkin_3    | QIDESDFVFR--CNFAP-TEVFHKDVGHTNLTTFN-PSILEKYNNLLT  |
| Amppe_3     | QIEKFDFVFR--CNFAP-TEIFKKDVGRRTNMTTFN-PSILEKYNNLLT |
| Oncmyk_3    | EIEKFDFVFR--CNFAP-TEIFHRDVGRRTNLTTFN-PSILEKYNNLLT |
| Gasacu_3    | QIEKFDFVFR--CNFAP-TEIFKKDVGRRTNMTTFN-PSILEKYNNLLT |
| Labber_3    | QIEKFDFVFR--CNFAP-TEVFKKDVGRRTNMTTFN-PSILEKYNNLLT |
| Panbuc_3    | EIDRYDFVFR--CNFAP-TEAFKKDVGRRTNLTTFN-PSILEKYNNLLT |
| Parhas_3    | AIDKYDFVFR--CNFAP-TEAFKKDVGRRTNLTTFN-PSILEKYNNLLT |
| Cluhar_3    | EIDKFDFVFR--CNFAP-TEVFRKDVGRHTNLTTFN-PSILEKYNNLLT |
| Aloalo_3    | EIDKFDFVFR--CNFAP-TEVFRKDVGRHTNLTTFN-PSILEKYNNLLT |
| Panhyp_3    | AIDAYDFVFR--CNFAP-TEVFRKDVGRHTNLTTFN-PSILEKYNNLLT |
| Eleele_3    | TIDQYDFVFR--CNFAP-TEVFRKDVGRHTNLTTFN-PSILEKYNNLLT |
| Denclu_3    | DIDKYDFVFR--CNFAP-TELFKKDVGRRTNLTTFN-PSILEKYNNLLT |
| Sarpil_3    | EIDKFDFVFR--CNFAP-TEVFRKDVGRHTNLTTFN-PSILEKYNNLLT |
| Eigvir_3    | AIDKYDFVFR--CNFAP-TEVFRKDVGRHTNLTTFN-PSILEKYNNLLT |
| Aptalb_3    | AIDRYDFVFR--CNFAP-TEAFKKDVGRRTNLTTFN-PSILEKYNNLLT |
| Sinans_3    | QIDSDFVFR--CNFAP-TEVFRDVGRRTNLTTFN-PSILEKYNNLLT   |
| Pygnat_3    | TIDKYDFVFR--CNFAP-TEVFRDVGRRTNLTTFN-PSILEKYNNLLT  |
| Astmex_3    | TIDKYDFVFR--CNFAP-TEVFRDVGRRTNLTTFN-PSILEKYNNLLT  |
| Caraur_3    | QIDSDFVFR--CNFAP-TEIFRRDVGRRTNLTTFN-PSILEKYNNLLT  |
| Danrer_3    | EIDKYDFVFR--CNFAP-TEVFRDVGRRTNLTTFN-PSILEKYNNLLT  |
| Ictpun_3    | AIDAYDFVFR--CNFAP-TEVFRDVGRRTNLTTFN-PSILEKYNNLLT  |
| Plealt_3    | EIEKFDFVFR--CNFAP-TEIFRRDVGRRTNMTTFN-PSILEKYNNLLT |
| Plealt_9    | EIDKADFVFR--CNFAP-TEVFYKDVGRKTNMTTFN-PSILEHYNNLLT |
| Gasacu_9    | EIDQADFVFR--CNFAP-TEVYSKDVGKTNLTTFN-PSILERYNNLLT  |
| Parkin_9    | EIDKFNIFR--CNFAP-TEIYHRDVGRRTNMTTFN-PSILERYNNLLT  |
| Acapol_9    | EIDEADFVFR--CNFAP-TEVYSKDVGKTNLTTFN-PSILERYNNLLT  |
| Larcro_9    | EIDQADFVFR--CNFAP-TEVYSKDVGKTNLTTFN-PSILERYNNLLT  |
| Notcor_9    | EIDQADFVFR--CNFAP-TEIYSKDVGKTNLTTFN-PSILERYNNLLT  |
| Latcal_9    | EIDQADFVFR--CNFAP-TEVYSKDVGKTNLTTFN-PSILERYNNLLT  |
| Serlaldor_9 | EIDQADFVFR--CNFAP-TEVYSKDVGKTNLTTFN-PSILERYNNLLT  |
| Monalb_9    | EIDQADFVFR--CNFAP-TEVYSKDVGKTNLTTFN-PSILERYNNLLT  |
| Serdum_9    | EIDQADFVFR--CNFAP-TEVYSKDVGKTNLTTFN-PSILERYNNLLT  |
| Perflu_9    | EIDQADFVFR--CNFAP-TEFYSKDVGKTNLTTFN-PSILERYNNLLT  |
| Perfla_9    | EIDQADFVFR--CNFAP-TEFYSKDVGKTNLTTFN-PSILERYNNLLT  |
| Stepar_9    | EIDQADFVFR--CNFAP-TEVYSKDVGKTNLTTFN-PSILERYNNLLT  |
| Molmol_9    | EIDQADFVFR--CNFAP-TDIYSKDVGKTNLTTFN-PSILERYNNLLT  |
| Hipcom_9    | EIDRADFVFR--CNFAP-TEVYAKDVGKTNLTTFN-PSILERYNNLLT  |
| Takrub_9 B  | NIDQADFVFR--CNFAP-TEVYSKDVGKTNMTTFN-PSILERYNNLLT  |
| Takrub_9    | NIDQADFVFR--CNFAP-TEVYSKDVGKTNMTTFN-PSILERYNNLLT  |
| Cynsem_9    | EIDQADFVFR--CNFAP-TEVYSKDVGKTNLTTFN-PSILERYNNLLT  |
| Scomax_9    | EIDQADFVFR--CNFAP-TEVYSKDVGKTNLTTFN-PSILERYNNLLT  |
| Corlav_9    | EIDSADFVFR--CNFAP-TDSYKDVGKTNLTTFN-PSILERYNNLLT   |
| Oncmyk_9    | EIDSADFVFR--CNFAP-TDSYKDVGKTNLTTFN-PSILERYNNLLT   |
| Salsal_9    | EIDSSDFVFR--CNFAP-TDSYKDVGKTNLTTFN-PSILERYNNLLT   |
| Onctsh_9    | EIDSADFVFR--CNFAP-TDSYKDVGKTNLTTFN-PSILERYNNLLT   |
| Salalp_9    | EIDSADFVFR--CNFAP-TDSYKDVGKTNLTTFN-PSILERYNNLLT   |
| Ampoce_9    | EIDEADFVFR--CNFAP-TEVYSKDVGKTNLTTFN-PSILERYNNLLT  |
| Amppe_9     | EIDEADFVFR--CNFAP-TEVYSKDVGKTNLTTFN-PSILERYNNLLT  |
| Labber_9    | EIDQADFVFR--CNFAP-TDVYSKDVGKTNLTTFN-PSILERYNNLLT  |
| Umbpyg_3B   | EIEKFDFVFR--CNFAP-TEIFRRDVGRRTNLTTFN-PSILEKYNNLLT |
| Esoluc_3b   | EIEKFDFVFR--CNFAP-TEVFRDVGRRTNLTTFN-PSILEKYNNLLT  |
| Gadmor_9    | EIDQADFVFR--CNFAP-TEVYKDVGRRTNMTTFN-PSILERYNNLLT  |
| Umbpyg_9    | EIDSADFVFR--CNFAP-IDSYKDVGRRTNLTTFN-PSILERYNNLLT  |
| Esoluc_9    | EIDSADFVFR--CNFAP-IESYKDVGRRTNLTTFN-PSILERYNNLLT  |
| Permag_9    | EIDQADFVFR--CNFAP-TEVYSKDVGKTNLTTFN-PSILERYNNLLT  |
| Bolpec_9    | EIDQADFVFR--CNFAP-TEVYSKDVGKTNLTTFN-PSILERYNNLLT  |
| Poefor_9    | EIDQADFVFR--CNFAP-TEVYKDVGKTNLTTFN-PSILERYNNLLT   |
| Masarm_9    | EIDQADFVFR--CNFAP-TEVYSKDVGKTNLTTFN-PSILERYNNLLT  |
| Anjap_9     | EIDRSDFVFR--CNFAP-TEVFHRDVGRRTNLTTFN-PSILEKYNNLLT |
| Poelat_9    | EIDQADFVFR--CNFAP-TEVYKDVGKTNLTTFN-PSILERYNNLLT   |
| Poeret_9    | VIDQADFVFR--CNFAP-TEFYKDVGKTNLTTFN-PSILERYNNLLT   |
| Xipmac_9    | EIDQADFVFR--CNFAP-TEIYKDVGKTNLTTFN-PSILERYNNLLT   |
| Hapbur_9    | EIDQADFVFR--CNFAP-TDIYSKDVGKTNLTTFN-PSILERYNNLLT  |
| Orylat_9    | EIDQADFVFR--CNFAP-TDVYSKDVGRRTNMTTFN-PSILERYNNLLT |

|             |                                                    |
|-------------|----------------------------------------------------|
| Gamaff_9    | EIDQADFVFR--CNFAP-TEVYFKDVGKKTNLTTFN-PSILERYNNLLT  |
| Neobri_9    | EIDQADFVFR--CNFAP-TDIYSKDVGKKTNLTTFN-PSILERYNNLLT  |
| Funhet_9    | EIDQADFVFR--CNFAP-TEVYSKDVGKKTNLTTFN-PSILERYNNLLT  |
| Punnye_9    | EIDQADFVFR--CNFAP-TDIYSKDVGKKTNLTTFN-PSILERYNNLLT  |
| Cypvar_9    | EIDQADFVFR--CNFAP-TDVYSKDVGKKTNLTTFN-PSILERYNNLLT  |
| Krymar_9    | EIDQADFVFR--CNFAP-TEVYSKDVGKKTNLTTFN-PSILERYNNLLT  |
| Notfur_9    | EIDQADFVFR--CNFAP-TEIYSKDVGKKTNMFTFN-PSILERYNNLLT  |
| Notpie_9    | EIDQADFVFR--CNFAP-TEIYSKDVGKKTNMFTFN-PSILERYNNLLT  |
| Orenil_9    | EIDQADFVFR--CNFAP-TDIYSKDVGKKTNLTTFN-PSILERYNNLLT  |
| Auslim_9    | EIDQADFVFR--CNFAP-TEIYSKDVGRKTNLTTFN-PSILERYNNLLT  |
| Anates_9    | EIDQADFVFR--CNFAP-TDVYSKDVGKKTNLTTFN-PSILERYNNLLT  |
| Astcal_9    | EIDQADFVFR--CNFAP-TDIYSKDVGKKTNLTTFN-PSILERYNNLLT  |
| Mayzeb_9    | EIDQADFVFR--CNFAP-TDIYSKDVGKKTNLTTFN-PSILERYNNLLT  |
| Orymel_9    | EIDQADFVFR--CNFAP-TDVYSKDVGRKTNMFTFN-PSILERYNNLLT  |
| Ampcit9     | EIDQADFVFR--CNFAP-TDIYSKDVGKKTNLTTFN-PSILERYNNLLT  |
| Macfas_2    | EIDAHSFVIR--CNLAP-VQEYARDVGLKTDLVTMN-PSVIQRAFEDLVN |
| Macmul_2    | EIDAHSFVIR--CNLAP-VQEYARDVGLKTDLVTMN-PSVIQRAFEDLVN |
| Macnem_2    | EIDAHSFVIR--CNLAP-VQEYARDVGLKTDLVTMN-PSVIQRAFEDLVN |
| Musmus_2    | EIDTHSFVIR--CNRAP-VQEYARDVGLKTDLVTMN-PSVIQRAFEDLVN |
| Ponabe_2    | EIDAHSFVIR--CNLAP-VQEYARDVGLKTDLVTMN-PSVIQRAFEDLVN |
| Papanu_2    | EIDAHSFVIR--CNLAP-VQEYARDVGLKTDLVTMN-PSVIQRAFEDLVN |
| Nomleu_2    | EIDAHSFVIR--CNLAP-VQEYARDVGLKTDLVTMN-PSVIQRAFEDLVN |
| Pantro_2    | EIDAHSFVIR--CNLAP-VQEYARDVGLKTDLVTMN-PSVIQRAFEDLVN |
| Latcha_2    | EIDDHQFVIR--CNLAP-VQEYASDVGTCTDFVTMN-PSVIQRAFEDLVN |
| Gnapet2     | EIDSHDFVIR--CNLAP-VEEYERDVGLRSSLVTMN-PSVVQRAFEDLAS |
| Panbuc_2b   | EIDACDYVIR--CNLAP-VQEYVTDVQGRTSMVTMN-PSVVQRAFQDLAS |
| Ostbic_2    | EIDSNDFVIR--CNLAP-VDEYEQDVGRRTSLVTMN-PSVVQRAFQDLAS |
| Sinrhi2     | EIDSHDFVIR--CNLAP-VEEYATDVGLRTSLVTMN-PSVVQRAFQDLNS |
| Hetzeb_2    | EIDAHEFVIR--CNLAP-VEEYAHDVGLKTDLVTMN-PSVVQRAFEDLKN |
| Hipcom_2    | QIDSHDFVIR--CNLAP-VEEYADDVGHRTDLVTMN-PSVVQRAFEDLVD |
| Prigla_2    | EIDTHEFVIR--CNLAP-VEEYAQDVGLKTDLVTMN-PSVVQRAFEDLKN |
| Scytor_2    | EIDTHEFVIR--CNLAP-VEEYAQDVGLKTDLVTMN-PSVVQRAFEDLKN |
| Tetcal_2    | EIDAHEFVIR--CNLAP-VEEYVQDVGMKTDLVTMN-PSVVQRAFEDLKN |
| Rhityp_2    | EIDDHQFVIR--CNLAP-VEEYAQDVGLKTDLVTMN-PSVVQRAFEDLKN |
| Parkin_2b   | EIDSHDFVIR--CNLAP-VQEFELDVGLRTGLVTMN-PSVVQRAFQDLGS |
| Angang_2    | QIDSHDFVIR--CNLAP-VEEYAADVQGRTSLVTMN-PSVVERAFEDLSS |
| Pygnat_2    | EIDSHDFVIR--CNLAP-VEEYTNVGLRTSLVTMN-PSVVQRAFQDLNS  |
| Parkin_2    | EIDSHDFVIR--CNLAP-VEEYEHVGLRSSLVTMN-PSVVQRAFEDLAS  |
| Gorgor_2    | EIDAHSFVIR--CNLAP-VQEYARDVGPKTDLVTMN-PSVIQRAFEDLVN |
| Thegel_2    | EIDAHSFVIR--CNLAP-VQEYARDVGLKTDLVTMN-PSVIQRAFEDLVN |
| Tupchi_2    | EIDTHSFVIR--CNLAP-VQEYAQDVGLKTDLVTMN-PSVIQRAFEDLVN |
| Galgal_2    | EIDTHSFVIR--CNLAP-VQEYSQDVGTCTDLVTMN-PSVIQRAFEDLMN |
| Eleele_2    | EIDSHDFIIR--CNLAP-IEHYVKDVGVRTGLVTMN-PSVVERVFQDLSS |
| Danrer_2    | EIDSHDFVIR--CNLAP-VEEYAADVGLRTSLVTMN-PSVVQRAFQDLNS |
| Canlupfam_2 | EIDTHSFVIR--CNLAP-VQEYGRDVGLKTDLVTMN-PSVIQRAFEDLVN |
| Aloalo_2    | EIDSYDFVIR--CNLAP-VDEFTADVGHRTNLVTMN-PSVVQRAFQDLSS |
| Astmex_2    | EIDSHDFVIR--CNLAP-VEEYAEVGLRSSLVTMN-PSVVQRAFQDLSS  |
| Sinans_2    | EIDSHDFVIR--CNLAP-VEEYATDVGLRTSLVTMN-PSVVQRAFQDLNS |
| Scifor_2    | EIDSNDFVIR--CNLAP-VEEYEQDVGHRTSLVTMN-PSVVQRAFQDLAS |
| Ceraty_2    | EIDAHSFVIR--CNLAP-VQEYARDVGLKTDLVTMN-PSVIQRAFEDLVN |
| Anocar_2    | EIDAHSFVIR--CNLAP-VQEYSRDVGTMDLVTMN-PSVIQRAFEDLVN  |
| Anates_2    | EIDSHDFIIR--CNLAP-VEEYSRDVGVQTNLVTMN-PSVVQRAFQDLVS |
| Ampbic_2    | EIDSHDFVIR--CNLAP-VEDYSRDVGRQTDLVTMN-PSVVQRAFQDLVS |
| Sarpil_2    | EIDSYDFVIR--CNLAP-VDEFADVGHRTSLVTMN-PSVVQRAFQDLSS  |
| Xenlae_2    | EIDSHDFVIR--CNLAP-VEEYAKDVGTCTNLVTMN-PSVVQRAFEDLVN |
| Cluhar_2    | EIDAHDFVIR--CNLAP-VNEFSADVGHRTNLVTMN-PSVVQRAFQDLSS |
| Cypcar_2    | EIDSHDFVIR--CNLAP-VEEYATDVGLRTSLVTMN-PSVVQRAFQDLNS |
| Denclu_2    | EIDSHDFVIR--CNLAP-VEEYAADVGHRTDLVTMN-PSVVQRAFQDLAN |
| Notpie_2    | EIDSHDFVIR--CNLAP-VEEYSQDVGWRTNLVTMN-PSVVQRAFQDLVT |
| Erpcal2     | EIDTHEFVIR--CNLAP-VQEFASDVGIRTNLVTMN-PSVVQRAFEDLAN |
| Amical_2    | EIDSHDFVIR--CNLAP-VEEYADDVGLRTSLVTMN-PSVVQRAFQDLVS |
| Lepocu_2    | EIDSHDFVIR--CNLAP-VEEYRADVGRRTSLVTMN-PSVVQRAFQDLAS |
| Homsap_2    | EIDAHSFVIR--CNLAP-VQEYARDVGLKTDLVTMN-PSVIQRAFEDLVN |
| Bostau_2    | EIDTHSFVIR--CNLAP-VQEYARDVGLKTDLVTMN-PSVVQRAFEDLVN |
| Caraur_2    | EIDSHDFVIR--CNLAP-VEEYATDVGLRTSLVTMN-PSVVQRAFQDLNS |
| Thythy_2B   | EIDSHDFVIR--CNLAP-VEEYAGDVGRRTNLVTMN-PSVVQRAFQDLAS |
| Onctsh_2B   | EIDSYDFVIR--CNLAP-VEEYAGDVGRRTNLVTMN-PSVVQRAFQDLAS |
| Salsal_2B   | EIDSYDFVIR--CNLAP-VEEYAGDVGRRTNLVTMN-PSVVQRAFQDLAS |
| Oncmyk_2B   | EIDSYDFVIR--CNLAP-VEEYAGDVGRRTNLVTMN-PSVVQRAFQDLAS |
| Onckis_2B   | EIDSYDFVIR--CNLAP-VEEYAGDVGRRTNLVTMN-PSVVQRAFQDLAS |
| Salsal_2A   | EIDSHDFVIR--CNLAP-VEEYAGDVQRTNLVTMN-PSVVQRAFHDLAS  |
| Thythy_2A   | EIDSHDFVIR--CNLAP-VEEYAGDVGRRTNLVTMN-PSVVQRAFHDLAS |
| Salalp_2A   | EIDSHDFVIR--CNLAP-VEEYAGDVGRRTNLVTMN-PSVVQRAFHDLAS |
| Corlav_2A   | EIDSHDFVIR--CNLAP-VEEYAGDVGRRTNLVTMN-PSVVQRAFHDLAS |
| Cormar_2A   | EIDSHDFVIR--CNLAP-VEEYAGDVGRRTNLVTMN-PSVVQRAFHDLAS |
| Onctsh_2A   | EIDSHDFVIR--CNLAP-VEEYAGDVGRRTNLVTMN-PSVVQRAFHDLAS |
| Oncmyk_2A   | EIDSHDFVIR--CNLAP-VEEYAGDVGRRTNLVTMN-PSVVQRAFHDLAS |

|             |                                                     |
|-------------|-----------------------------------------------------|
| Neobri_2    | EIDSHDFVIR--CNLAP-VEEYFQDVGWRTNLVTMN-PSVVQRAFQDLVT  |
| Takrub_2    | EIDSHDFVIR--CNLAP-VEDYYKDVGWRTNLVTMN-PSVVQRAFRDLAS  |
| Tetnig_2    | EIDSHDFVIR--CNLAP-VEDFHNDVGWRTNLVTMN-PSVVQRAFRDLAS  |
| Orenil_2    | EIDSHDFVIR--CNLAP-VEEYFQDVGWRTNLVTMN-PSVVQRAFQDLVT  |
| Orylat_2    | EIDAHDFVIR--CNLAP-VDEYSQDVGRTNLVTMN-PSVVQRAFQDLVS   |
| Krymar_2    | EIDSHDFVIR--CNLAP-VEEYSRDVGRRTNLVTMN-PSVVQRAFQDLVT  |
| Notfur_2    | EIDSHDFVIR--CNLAP-VEEYSQDVGWRTNLVTMN-PSVVQRAFQDLVT  |
| Poelat_2    | EIDSHDFVIR--CNLAP-VEEYSQDVGRRTNLVTMN-PSVVQRAFQDLVS  |
| Gadmor_2    | EIDSYDFVIR--CNLAP-VKEYSVDVGRRTNLVTMN-PSVVQRAFQDLAS  |
| Xipmac_2    | EIDSHDFVIR--CNLAP-VEEYSQDVGRRTNLVTMN-PSVVQRAFQDLVS  |
| Poeret_2    | EIDSHDFVIR--CNLAP-VEEYSQDVGRRTNLVTMN-PSVVQRAFQDLVS  |
| Astcal_2    | EIDSHDFVIR--CNLAP-VEEYFQDVGWRTNLVTMN-PSVVQRAFQDLVT  |
| Hapbur_2    | EIDSHDFVIR--CNLAP-VEEYFQDVGWRTNLVTMN-PSVVQRAFQDLVT  |
| Acapol_2B   | EIDSHDFVIR--CNLAP-VDDYSRDVGRRTNLVTMN-PSVVQRAFQDLVS  |
| Ampoce_2A   | EIDSHDFVIR--CNLAP-VEDYSRDVGRTNLVTMN-PSVVQRAFQDLVN   |
| Acapol_2A   | EIDSHDFVIR--CNLAP-VDDYSRDVGRRTNLVTMN-PSVVQRAFQDLVS  |
| Mayzeb_2    | EIDSHDFVIR--CNLAP-VEEYFQDVGWRTNLVTMN-PSVVQRAFQDLVT  |
| Punnye_2    | EIDSHDFVIR--CNLAP-VEEYFQDVGWRTNLVTMN-PSVVQRAFQDLVT  |
| Latcal_2    | EIDSHDFVIR--CNLAP-VEEYSRDVGWRTNLVTMN-PSVVQRAFQDLVS  |
| Singra_2    | EIDSHDFVIR--CNLAP-VEEYATDVGLRTSLVTMN-PSVVQRAFQDLNS  |
| Auslim_2    | EIDSHDFVIR--CNLAP-VEEYSEDVGRRTNLVTMN-PSVVQRAFQDLVT  |
| Monalb_2    | EIDSHDFVIR--CNLAP-VEEYSRDVGRRTNLVTMN-PSVVQRAFQDLVT  |
| Ampoce_2B   | EIDSHDFVIR--CNLAP-VEDYSRDVGRTNLVTMN-PSVVQRAFQDLVN   |
| Chiham_2    | DIDSHDFVIR--CNLAP-VDEFSQDVGRRTNLVTMN-PSVVQRAFQDLVS  |
| Gasacu_2    | DIDSHDFVIR--CNLAP-VEDYSLDVGRRTNLVTMN-PSVVQRAFQDLVS  |
| Gymacu_2    | DIDSHDFVIR--CNLAP-VDEFSQDVGRRTNLVTMN-PSVVQRAFQDLVS  |
| Labber_2    | EIDSHDFVIR--CNLAP-VADYYQDVGWRTNLVTMN-PSVVQRAFQDLVS  |
| Cypvar_2    | EIDSHDFVIR--CNLAP-VEEYSQDVGLRTNLVTMN-PSVVQRAFQDLIS  |
| Funhet_2    | EIDSHDFVIR--CNLAP-VEEYSQDVGRRTNLVTMN-PSVVQRAFQDLVS  |
| Larcro_2    | EIDSHDFVIR--CNLAP-VEEYRDVGWRTNLVTMN-PSVVQRAFQDLVS   |
| Paroli_2    | EIDSHDFVIR--CNLAP-VEEFSDVGRRTNLVTMN-PSVVQRAFQDLVS   |
| Perflu_2    | DIDSHDFVIR--CNLAP-VEEYFQDVGWRTNLVTMN-PSVVQRAFQDLVS  |
| Serdum_2    | EIDSHDFVIR--CNLAP-VEEYSRDVGRRTNLVTMN-PSVVQRAFMDLVS  |
| Stepar_2    | EIDSHDFVIR--CNLAP-VEDYSRDVGRRTNLVTMN-PSVVQRAFQDLVS  |
| Notcor_2    | DIDSHDFVIR--CNLAP-VDEFSQDVGRRTNLVTMN-PSVVQRAFQDLVS  |
| Treber_2    | DIDSHDFVIR--CNLAP-VDEFSQDVGRRTNLVTMN-PSVVQRAFQDLVS  |
| Serlaldor_2 | EIDSHDFVIR--CNLAP-VEEYSRDVGRRTNLVTMN-PSVVQRAFMDLVS  |
| Plaste_2    | EIDSHDFVIR--CNLAP-VEEYSWDVGTRTSLVTMN-PSVVQRAFQDLVS  |
| Clabat_4    | EIDSHDFVIR--CNLAP-LAEFAEDVGLRSDFTTMN-PSVIQRAYGGLSN  |
| Ictpun_4A   | EIDSHDFVIR--CNLAP-LAEFADDVGLRSDFTTMN-PSVIQRAYGGLLN  |
| Panhyp_4    | EIDSHDFVIR--CNLAP-LAEFAEDVGLRSDFTTMN-PSVIQRAYGGLLN  |
| Umbpyg_4    | EIDSHDFVIR--CNLAP-LAEFSEDVGLRSDFTTMN-PSVIQRAYGGLKN  |
| Esoluc_4    | EIDSHDFVIR--CNLAP-LAQFAEDVGLRSDFTTMN-PSVIQRAYGGLRN  |
| Plealt_4    | EIDSHDFVIR--CNLAP-LSEYADDVGLRSDFTTMN-PSVIQRAYGGLKN  |
| Onckis_4B   | EIDSHDFVIR--CNLPP-LSEFAEDVGLRSDFTTMN-PSVIQRAYGGLKN  |
| Onckis_4A   | EIDSHDFVIR--CNLPP-LSEFAEDVGLRSDFTTMN-PSVIQRAYGGLKN  |
| Onctsh_4    | EIDSHDFVIR--CNLPP-LSEFAEDVGLRSDFTTMN-PSVIQRAYGGLKN  |
| Oncmyk_4    | EIDSHGFVIR--CNLPP-LSEFAEDVGLRSDFTTMN-PSVIQRAYGGLKN  |
| Corlav_4    | EIDRHDFVIR--CNLAP-LAEFAEDVGLRSDFTTMN-PSVIQRAYGGLKN  |
| Astmex_4A   | EIDGHDFVIR--CNLAP-LAEFAEDVGLKSDFTTMN-PSVIQRAYGGLRN  |
| Pygnat_4    | EIDSHDFVIR--CNLAP-LVEFAEDVGLKSDFTTMN-PSVIQRAYGGLRN  |
| Aloalo_4    | EIDSHGFVIR--CNLAP-LAEFAEDVGLRSDFTTMN-PSVIQRAYGGLRN  |
| Cluhar_4    | EIDSHDFVIR--CNLAP-QAEFAADVGLRSDFTTMN-PSVIQRAYGGLRN  |
| Denclu_4    | EIDSHDFVIR--CNLAP-LKEFAEDVGLRSDFTTMN-PSVIHRVYGGLOK  |
| Konpun_4    | EIDSHDFVIR--CNLAP-LVEFAADVGLRSDFTTMN-PSVIQRAYSGGLRN |
| Sarpil_4    | EIDSHDFVIR--CNLAP-LAEFAEDVGLRSDFTTMN-PSVIQRAYGGLRN  |
| Caraur_4    | EIDSHGFVIR--CNLAP-LVEFADDVGLRSDFTTMN-PSVIQRAYGGLRD  |
| Cteide_4    | EIDNHDFVIR--CNLAP-LKDFADDVGLRSDFTTMN-PSVIQRAYGGLRD  |
| Petmar_4    | EIDQHDFVIR--CNLAP-VEGYERDVGSRVDFVTMN-PSVVERTYGGRLT  |
| Cypcar_4    | EIDSHGFVIR--CNLAP-LEEFADDVGLRSDFTTMN-PSVIQRAYGGLQD  |
| Danrer_4    | EIDNHDFVIR--CNLAP-LEEFADDVGLRSDFTTMN-PSVIQRAYGGLRE  |
| Misang_4    | EIDNHDFVIR--CNLAP-LEEFADDVGLKSDFTTMN-PSVIQRAYGGLHN  |
| Angjap_4    | EIDGHDFVIR--CNLAP-LEEFADDVGLRSDFTTMN-PSVIQRAYGGLRN  |
| Cypcar_4A   | EIDSHGFVIR--CNLAP-LEEFADDVGLRSDFTTMN-PSVIQRAYGGLQD  |
| Angang_4    | EIDGHDFVIR--CNLAP-LEEFADDVGLRSDFTTMN-PSVIQRAYGGLRN  |
| Cypcar_4B   | EIDSHGFVIR--CNLAP-LEEFADDVGLRSDFTTMN-PSVIQRAYGGLRD  |
| Sinans_4A   | EIDSHGFVIR--CNLAP-LEEFADDVGLRSDFTTMN-PSVIQRAYGGLRD  |
| Sinans_4B   | EIDSHGFVIR--CNLAP-LEEFADDVGLRSDFTTMN-PSVIQRAYGGLRD  |
| Singra_4A   | EIDSHGFVIR--CNLAP-LEEFADDVGLRSDFTTMN-PSVIQRAYGGLQD  |
| Aptalb_4    | EIDSHDFVIR--CNLAP-LAEFIKDVGLKSDFTTMN-PSVIQRAYGGLRN  |
| Eigvir_4    | EIDHDHDFVIR--CNLAP-LAEFIKDVGLKSDFTTMN-PSVIQRAYHGLRN |
| Eleele_4    | EIDSHDFVIR--CNLAP-LAKFAEDVGLKSDFTTMN-PSVIQRAYGGLRN  |
| Parhas_4    | EIDSHDFVIR--CNLAP-LAEFIKDVGLKSDFTTMN-PSVIQRAYGGLRN  |
| ScIfor_4    | EIDNHDFVIR--CNLAP-LVEFSEDVGLKSDFTTMN-PSVIQRAYGGLKN  |
| Gnapet_4    | EIDSNDFVIR--CNLAP-LANFSEDVGLRSDFTTMN-PSVIQRAYGGLRN  |
| Ostbic_4    | EIDSHDFVIR--CNLAP-LVEFSEDVGLRSDFTTMN-PSVIQRAYGGLKN  |
| Parkin_4    | EIDSNDFVIR--CNLAP-LANFSEDVGLRSDFTTMN-PSVIQRAYGGLRN  |

|              |                                                     |
|--------------|-----------------------------------------------------|
| Panbuc_4     | EIDSHDFIIR--CNLAP-VTEFAVDVGQRSHFITMN-PSVIQRAYGSLRN  |
| Erpcal4      | EIDNHDFVIR--CNLAP-VVEFAEDVGNRSDFITMN-PSVIQRAFGGFQN  |
| Salsal_4     | EIDSHDFVIR--CNLPP-LSEFAEDVGLRSDFTTMN-PSVIQRAYGGLKN  |
| Saltru_4     | EIDSHDFVIR--CNLPP-LSEFAEDVGLRSDFTTMN-PSVIQRAYGGLKN  |
| Salalp_4     | EIDSHDFVIR--CNLPP-LSEFAEDVGLRSDFTTMN-PSVIQRAYGGLKN  |
| Salfon_4     | EIDSHDFVIR--CNLPP-LSEFAEDVGLRSDFTTMN-PSVIQRAYGGLKN  |
| Thythy_4     | EIDSHDFVIR--CNLAP-LADFAEDVGLRSDFTTMN-PSVIQRAYGGLKN  |
| Calmil_4     | EIDSHEFVIR--CNLAP-LVEYTDVVGSKSDFVTMN-PSVVQRAFGSLQN  |
| Hetzeb_4     | EIDSHEFVIR--CNLAP-LMEYTDVVGSKSDFVTMN-PSVVQRAFGSLRS  |
| Rhityp_4     | EIDSHEFVIR--CNLAP-LVEYADDVGLKSDFVTMN-PSVVQRAFGSLRS  |
| Scytor_4     | EIDSHEFVIR--CNLAP-LVEYADDVGLKSDFVTMN-PSVVQRAFGSLRS  |
| Squaca_4     | EIDSHEFVIR--CNLAP-LVEYADDVGLKSDFVTMN-PSVVQRAFGSLQS  |
| Amical_4     | EIDSHDFVIR--CNLAP-LAEFSEDVGLRSDFITMN-PSVIQRAFGGFKN  |
| Lepocu_4     | EIDNHDFVIR--CNLAP-LAEFSEDVGLRSDFITMN-PSVIQRAFGGFKN  |
| Agema_4      | EIDSHDFVIR--CNLAP-LSEFAEDVGLRSDFTTMN-PSVIQRAYSGLLN  |
| Anocar_4     | EIDSHEFVIR--CNLAP-VVEFAADVGTKSDFITMN-PSVVQRAFGGFNR  |
| Canlupfam_4  | EIDSHNFVIR--CNLAP-VVEFAADVGTKSDFITMN-PSVVQRAFGGFNR  |
| Crigri_4     | EIDSHNFVIR--CNLAP-VVEFAADVGTKSDFITMN-PSVVQRAFGGFNR  |
| Galgai_4     | EIDSHDFVIR--CNLAP-VVEFAADVGNKSDFITMN-PSVVQRAFGGFNR  |
| Mesaur_4     | EIDSHNFVIR--CNLAP-VVEFAADVGTKSDFITMN-PSVVQRAFGGFNR  |
| Homsap_4     | EIDSHNFVIR--CNLAP-VVEFAADVGTKSDFITMN-PSVVQRAFGGFNR  |
| Notscuscu_4  | EIDSHEFVIR--CNLAP-VVEFAADVGTKSDFITMN-PSVVQRAFGGFNR  |
| Psetextex_4  | EIDSHEFVIR--CNLAP-VVEFAADVGTKSDFITMN-PSVVQRAFGGFNR  |
| Musmus_4     | EIDSHNFVIR--CNLAP-VVEFAADVGTKSDFITMN-PSVVQRAFGGFNR  |
| Pogvit_4     | EIDNHDFVIR--CNLAP-VVEFAADVGTKSDFITMN-PSVVQRAFGGFNR  |
| Promuc_4     | EIDNHDFVIR--CNLAP-VVEFAADVGTKSDFITMN-PSVVQKAFGGFRN  |
| Pantro_4     | EIDSHNFVIR--CNLAP-VVEFAADVGTKSDFITMN-PSVVQRAFGGFNR  |
| Pytbiv_4     | EIDNHDFVIR--CNLAP-VVEFAADVGTKSDFITMN-PSVVQRAFGGFNR  |
| Ratnor_2     | EIDTHSFVIR--CNLAP-VQEYARDVGLKTDLVTMN-PSVIQRAFEDLVN  |
| Ratnor_4     | EIDSHNFVIR--CNLAP-VVEFAADVGTKSDFITMN-PSVVQRAFGGFNR  |
| Siltro_2     | EIDSHDFVIR--CNLAP-VVEYATDVGTKNLVTMN-PSVVQRAFEDLVN   |
| Siltro_4     | EIDSHDFVIR--CNLAP-VVEFAAHVGTKSDFITMN-PSVVQRAFGGFNR  |
| Susscr_4     | EIDSHNFVIR--CNLAP-VVEFAADVGTKSDFITMN-PSVVQRAFGGFNR  |
| Taegut_4     | EIDSHDFVIR--CNLAP-VVEYAADVGTKSDFITMN-PSVVQRAFGGFNR  |
| Termextri_4M | EIDNHDFVIR--CNLAP-VVEFAADVGTKSDFITMN-PSVVQRAFGGFNR  |
| Thasirsir_4  | EIDSHEFVIR--CNLAP-VVEFAADVGTKSDFITMN-PSVVQRAFGGFNR  |
| Xenlae_4B    | EIDSHDFVIR--CNLAP-VVEFAADVGTKSDFITMN-PSVVQRAFGGFNR  |
| Xenlae_4A    | EIDSHDFVIR--CNLAP-VVEFAADVGTKSDFITMN-PSVVQRAFGGFNR  |
| 101          |                                                     |
| Latcal_3     | VQDR-NNFFLSLKKLDGAILWIPAFFFHSTATVTRTLVDFFVEHRGQ---  |
| Perflu_3     | VQDR-NNFFLSLKKLDGAILWIPAFFFHSTATVTRTLVDFFVEHRGQ---  |
| Serdum_3     | VQDR-NNFFLSLKKLDGAILWIPAFFFHSTATVTRTLVDFFVEHRGQ---  |
| Stepar_3     | VQDR-NNFFLSLKKLDGAILWIPAFFFHSTATVTRTLVDFFVEHRGQ---  |
| Tetcal_3     | IQDR-NKFFLNKRLDGAAILWIPAFFFHSTAPVTRTLVDFFVEHRAQ---  |
| Monalb_3     | VQDR-NNFFLSLKKLDGAAILWIPAFFFHSTATVTRTLVDFFVEHQGQ--- |
| Molmol_3     | VQDR-NNFFLSLKKLDGAILWIPAFFFHSTATVTRTLVDFFVEHRGQ---  |
| Takrub_3     | VQDR-NNFFLSLKKLDTTILWIPAFFFHSTATVTRTLVDFFVEHRGQ---  |
| Canlupfam_3  | IQDR-NNFFLSLKKLDGAILWIPAFFFHSTATVTRTLVDFFVEHRGQ---  |
| Bostau_3     | IQDR-NNFFLSLKKLDGAILWIPAFFFHSTATVTRTLVDFFVEHRGQ---  |
| Homsap_3     | IQDR-NNFFLSLKKLDGAILWIPAFFFHSTATVTRTLVDFFVEHRGQ---  |
| Siltro_3     | IQDR-NNFFLSLKKLDGAILWIPAFFFHSTASVTRTLVDFFVEHRDQ---  |
| Anocar_3     | IQDR-NNFFLSLKKLDGAILWIPAFFFHSTATVTRTLVDFFVEHRAQ---  |
| Musmus_3     | IQDR-NNFFLSLKKLDGAILWIPAFFFHSTATVTRTLVDFFVEHRGQ---  |
| Pantro_3     | IQDR-NNFFLSLKKLDGAILWIPAFFFHSTATVTRTLVDFFVEHRGQ---  |
| Ratnor_3     | IQDR-NNFFLSLKKLDGAILWIPAFFFHSTATVTRTLVDFFVEHRGQ---  |
| Galgai_3     | IQDR-NNFFLSLKKLDGAILWIPAFFFHSTATVTRTLVDFFVEHRGQ---  |
| Lepocu_3     | IQDR-NNFFLSLKKLDGAILWIPAFFFHSTATVTRTLVDFFVEHKGQ---  |
| Tetnig_3     | VQDR-NNFFLSLKKLDPAAILWIPAFFFHSTATVTRTLVDFFVEPRGQ--- |
| Squaca_3     | IQDR-NKFFLNKLLDGAAILWIPAFFFHSTAPVTRTLVDFFMEHRAQ---  |
| Perfla_3     | VQDR-NNFFLSLKKLDGAILWIPAFFFHSTATVTRTLVDFFVEHRGQ---  |
| Salsal_3     | IQDR-NNFFLSLKKLDRAILWIPAFFFHSTATVTRTLVDFFVEHRGQ---  |
| Serlaldor_3  | VQDR-NNFFLSLKKLDGAILWIPAFFFHSTATVTRTLVDFFVEHRGQ---  |
| Treber_3     | IQDR-NNFFLNKLLKLEGAILWIPAFFLHSTATVTRTLVDFFVEHKGQ--- |
| Cynsem_3     | VQDR-NNFFLSLKKLDNAILWIPAFFFHSTATVTRTLVDFFVEHRGQ---  |
| Paroli_3     | IQDR-NNFFLNKLLKLEGAILWIPAFFLHSTATVTRTLVDFFVEHKGQ--- |
| Paroli_3b    | VQDR-NNFFLSLKKLDNAILWIPAFFFHSTATVTRTLVDFFVEHRGQ---  |
| Plaste_3     | IQDR-NNFFLNKLLKLESAILWIPAFFLHSTATVTRTLVDFFVEHKGQ--- |
| Plaste_3b    | VQDR-NNFFLSLKKLDSAILWIPAFFFHSTATVTRTLVDFFVEHRGQ---  |
| Erpcal3      | IQDR-NNFFLSLKKLDGAILWIPAFFFHSTATVTRTLVDFFVEHKGQ---  |
| Calmil_3b    | IQDR-NKFFLNKLLDGAAILWIPAFFFHSSALVTRTLVDFFVEHRRQ---  |
| Hetzeb_3     | IQDR-NKFFLNKLLDGAAILWIPAFFFHSTAPVTRTLVDFFVEHRAQ---  |
| Latcha_3     | IQDR-NNFFLSLKKLDGAILWIPAFFFHSTATVTRTLVDFFVEHKGQ---  |
| Anates_3     | VQDR-NNFFLSLKKLDGAILWIPAFFFHSTATVTRTLVDFFVEHRGQ---  |
| Ampcit3      | VQDR-NNFFLSLKKLDGAILWIPAFFFHSTATVTRTLVDFFVEHRDQ---  |
| Auslim_3     | VQDR-NNFFLSLKKLDGAILWIPAFFFHSTATVTRTLVDFFVEHRGQ---  |
| Cypvar_3     | VQDR-NNFFLSLKKLDRAILWIPAFFFHSTATVTRTLVDFFVEHRGQ---  |
| Krymar_3     | VQDR-NNFFLSLKKLDSAILWIPAFFFHSTATVTRTLVDFFVEHRGQ---  |



|             |                                                     |
|-------------|-----------------------------------------------------|
| Funhet_3    | VQDR-NNFFLSLKKLDRAILWIPAFFFHSTSATVTRTLVDFFVEHRGQ--- |
| Gamaff3     | VQDR-NNFFLSLKKLDRAILWIPAFFFHSTSATVTRTLVDFFVEHRGQ--- |
| Orylat_3    | VQDR-NNFFLSLKKLDGAILWIPAFFFHSTSATVTRTLVDFFVEHRGQ--- |
| Orenil_3    | VQDR-NNFFLSLKKLDGAILWIPAFFFHSTSATVTRTLVDFFVEHRGQ--- |
| Mayzeb_3    | VQDR-NNFFLSLKKLDGAILWIPAFFFHSTSATVTRTLVDFFVEHKGQ--- |
| Punnye_3    | VQDR-NNFFLSLKKLDGAILWIPAFFFHSTSATVTRTLVDFFVEHKGQ--- |
| Punnye_3a   | VQDR-NNFFLSLKKLDGAILWIPAFFFHSTSATVTRTLVDFFVEHKGQ--- |
| Neobri_3    | VQDR-NNFFLSLKKLDGAILWIPAFFFHSTSATVTRTLVDFFVEHKGQ--- |
| Misang_3    | IQDR-NNFFLSLKKLDGAILWIPAFFFHSTSATVTRTLVDFFVEHKGQ--- |
| Sinrhi3     | IQDR-NNFFLSLKKLDGAILWIPAFFFHSTSATVTRTLVDFFVEHKGQ--- |
| Singra_3    | IQDR-NNFFLSLKKLDGAILWIPAFFFHSTSATVTRTLVDFFVEHKGQ--- |
| Hapbur_3    | VQDR-NNFFLSLKKLDGAILWIPAFFFHSTSATVTRTLVDFFVEHKGQ--- |
| Astcal_3    | VQDR-NNFFLSLKKLDGAILWIPAFFFHSTSATVTRTLVDFFVEHKGQ--- |
| Notfur_3    | VQDR-NNFFLSLKKLDGAVLWIPAFFFHSTSATVTRTLVDFFVEHRGQ--- |
| Cypcar_3    | IQDR-NNFFLSLKKLDGAILWIPAFFFHSTSATVTRTLVDFFVEHKGQ--- |
| Poefor3     | VQDR-NNFFLSLKKLDRAILWIPAFFFHSTSATVTRTLVDFFVEHRGQ--- |
| Poelat_3    | VQDR-NNFFLSLKKLDRAILWIPAFFFHSTSATVTRTLVDFFVEHRGQ--- |
| Poeret_3    | VQDR-NNFFLSLKKLDTAILWIPAFFFHSTSATVTRTLVDFFVEHRGQ--- |
| Angang_3    | IQDR-NNFFLSLKKLDGVLWIPAFFFHSTSATVTRTLVDFFVEHRGQ---  |
| Xipmac_3    | VQDR-NNFFLSLKKLDRAILWIPAFFFHSTSATVTRTLVDFFVEHRGQ--- |
| Masarm_3    | VQDR-NNFFLSLKKLDGAILWIPAFFFHSTSATVTRTLVDFFVEHRGQ--- |
| Permag_3    | VQDR-NNFFLSLKKLDGAILWIPAFFFHSTSATVTRTLVDFFVEHRGK--- |
| Gnapet3     | IQDR-NNFFLSLKKLDSAILWIPAFFFHSTSATVTRTLVDFFVEHKGQ--- |
| Ostbic_3    | IQDR-NNFFLSLKKLDDAILWIPAFFFHSTSATVTRTLVDFFVEHKGQ--- |
| Gadmor_3    | VQDR-NNFFLSLKKLDGAILWIPAFFFHSTSATVTRTLVDFFVEHRGQ--- |
| Scifor_3    | IQDR-NNFFLSLKKLDDAILWIPAFFFHSTSATVTRTLVDFFVEHKGQ--- |
| Acapol3     | VQDR-NNFFLSLKKLDGAILWIPAFFFHSTSATVTRTLVDFFVEHRGQ--- |
| Ampoce_3    | VQDR-NNFFLSLKKLDGAILWIPAFFFHSTSATVTRTLVDFFVEHRGQ--- |
| Scifor_3b   | IQDR-NNFFLSLKKLDGAILWIPAFFFHSTSATVTRTLVDFFVEHKGQ--- |
| Ostbic_3b   | IQDR-NNFFLSLKKLDGAILWIPAFFFHSTSATVTRTLVDFFVEHKGQ--- |
| Parkin_3    | IQDR-NNFFLSLKKLDSAILWIPAFFFHSTSATVTRTLVDFFVEHKGQ--- |
| Amppe3      | VQDR-NNFFLSLKKLDGAILWIPAFFFHSTSATVTRTLVDFFVEHRGQ--- |
| Oncmyk_3    | LQDR-NNFFLSLKKLDGAILWIPAFFFHSTSATVTRTLVDFFVEHRGQ--- |
| Gasacu_3    | VQDR-NNFFLSLKKLDGAILWIPAFFFHSTSATVTRTLVDFFVEHRGQ--- |
| Labber_3    | VQDR-NNFFLSLKKLDGAILWIPAFFFHSTSATVTRTLVDFFVEHRGQ--- |
| Panbuc_3    | IQDR-NNFFLSLKKLDGAVLWIPAFFFHSTSATVTRTLVDFFVEHKGQ--- |
| Parhas3     | IQDR-NNFFLSLKKLDGAILWIPAFFFHSTSATVTRTLVDFFVEHRGQ--- |
| Cluhar_3    | IQDR-NNFFLSLKKLDGAILWIPAFFFHSTSATVTRTLVDFFVEHKGQ--- |
| Aloalo_3    | IQDR-NNFFLSLKKLDGAILWIPAFFFHSTSATVTRTLVDFFVEHKGQ--- |
| Panhyp_3    | IQDR-NNFFLSLKKLDGAILWIPAFFFHSTSATVTRTLVDFFVEHRGQ--- |
| Eleele_3    | IQDR-NNFFLSLKKLDGAILWIPAFFFHSTSATVTRTLVDFFVEHRGQ--- |
| Denclu_3    | IQDR-NNFFLSLKKLDGAVLWIPAFFFHSTSATVTRTLVDFFVEHKGQ--- |
| Sarpil_3    | IQDR-NNFFLSLKKLDGAILWIPAFFFHSTSATVTRTLVDFFVEHKGQ--- |
| Eigvir_3    | IQDR-NNFFLSLKKLDGAILWIPAFFFHSTSATVTRTLVDFFVEHKGQ--- |
| Aptalb_3    | IQDR-NNFFLSLKKLDGAILWIPAFFFHSTSATVTRTLVDFFVEHRGQ--- |
| Sinans_3    | IQDR-NNFFLSLKKLDGAILWIPAFFFHSTSATVTRTLVDFFVEHKGQ--- |
| Pygnat_3    | IQDR-NNFFLSLKKLDRAILWIPAFFFHSTSATVTRTLVDFFVEHRGQ--- |
| Astmex_3    | IQDR-NNFFLSLKKLDRAVLWIPAFFFHSTSATVTRTLVDFFVEHKGQ--- |
| Caraur_3    | IQDR-NNFFLSLKKLDGAILWIPAFFFHSTSATVTRTLVDFFVEHKGQ--- |
| Danrer_3    | IQDR-NNFFLSLKKLDGAILWIPAFFFHSTSATVTRTLVDFFVEHKGQ--- |
| Ictpun_3    | IQDR-NNFFLSLKKLDGAILWIPAFFFHSTSATVTRTLVDFFVEHRGQ--- |
| Plealt_3    | IQDR-NNFFLSLKKLDGAILWIPAFFFHSTSATVTRTLVDFFVEHRGQ--- |
| Plealt_9    | IQDR-NNFFLNKKKLEGAILWIPAFFLHSTSATVTRTLVDFFVEHKGQ--- |
| Gasacu_9    | IQDR-NNFFLNKKKLEGAILWIPAFFLHSTSATVTRTLVDFFVEHKGQ--- |
| Parkin_9    | IQDR-NNFFLNKKKLEGAILWIPAFFFHSTSAPVTRTLIDFFIEHKGQ--- |
| Acapol_9    | IQDR-NNFFLNKKKLEGAILWIPAFFLHSTSATVTRTLVDFFVEHKGQ--- |
| Larcro_9    | IQDR-NNFFLNKKKLEGAILWIPAFFLHSTSATVTRTLVDFFVEHKGQ--- |
| Notcor_9    | IQDR-NNFFLNKKKLEGAILWIPAFFLHSTSATVTRTLVDFFVEHKGQ--- |
| Latcal_9    | IQDR-NNFFLNKKKLEGAILWIPAFFLHSTSATVTRTLVDFFVEHKGQ--- |
| Serlaldor_9 | IQDR-NNFFLNKKKLEGAILWIPAFFLHSTSATVTRTLVDFFVEHKGQ--- |
| Monalb_9    | IQDR-NNFFLSLKKLEGAILWIPAFFLHSTSATVTRTLVDFFVEHKGQ--- |
| Serdum_9    | IQDR-NNFFLNKKKLEGAILWIPAFFLHSTSATVTRTLVDFFVEHKGQ--- |
| Perflu_9    | IQDR-NNFFLNKKKLEGAILWIPAFFLHSTSATVTRTLVDFFVEHKGQ--- |
| Perfla_9    | IQDR-NNFFLNKKKLEGAILWIPAFFLHSTSATVTRTLVDFFVEHKGQ--- |
| Stepar_9    | IQDR-NNFFLNKKKLEGAILWIPAFFLHSTSATVTRTLVDFFVEHKGQ--- |
| Molmol_9    | IQDR-NNFFLNKKKLEGAILWIPAFFLHSTSATVTRTLVDFFVEHKGQ--- |
| Hipcom_9    | IQDR-NNFFLHLKKLEGAILWIPAFFLHSTSATVTRTLVDFFVEHKGQ--- |
| Takrub_9 B  | IQDR-NNFFLNKKLGGAILWIPAFFLHSTSATVTRTLVDFFVEHKGQ---  |
| Takrub_9    | IQDR-NNFFLNKKLGGAILWIPAFFLHSTSATVTRTLVDFFVEHKGQ---  |
| Cynsem_9    | IQDR-NNFFLNKKKLEGAILWIPAFFLHSTSATVTRTLVDFFVEHKSQ--- |
| Scomax_9    | IQDR-NNFFLSLKKLEAILWIPAFFLHSTSATVTRTLVDFFVEHKGQ---  |
| Corlav_9    | IQDR-NNFFLNKKKLEGAILWIPAFFLHSTSATVTRTLVDFFVEHKGQ--- |
| Oncmyk_9    | IQDR-NNFFLNKKKLEGAILWIPAFFLHSTSATVTRTLVDFFVEHKGQ--- |
| Salsal_9    | IQDR-NNFFLNKKKLEGAILWIPAFFLHSTSATVTRTLVDFFVEHKGQ--- |
| Onctsh_9    | IQDR-NNFFLNKKKLEGAILWIPAFFLHSTSATVTRTLVDFFVEHKGQ--- |
| Salalp_9    | IQDR-NNFFLNKKKLEGAILWIPAFFLHSTSATVTRTLVDFFVEHKGQ--- |
| Ampoce_9    | IQDR-NNFFLNKKKLEGAILWIPAFFLHSTSATVTRTLVDFFVEHKGQ--- |

|             |                                                      |
|-------------|------------------------------------------------------|
| Ampper9     | IQDR-NNFFLNKKLEGAILWIPAFFLHTSATVTRTLVDFFVEHKGQ----   |
| Labber_9    | IQDR-NNFFLNKKLEGAILWIPAFFLHTSATVTRTLVDFFVEHKGQ----   |
| Umbpyg_3B   | IQDR-NNFFLSLKKLDGAILWI-AFFFHTSATVTRTLVDFFVEHRGQ----  |
| Esoluc_3b   | IQDR-NNFFLSLKKLDGAILWIPAFFHTSATVTRTLVDFFVEHRGQ----   |
| Gadmor_9    | IQDR-NNFFLNKKLEGAILWIPAFFLHTSATVTRTLVDFFVEHKGQ----   |
| Umbpyg_9    | IQDR-NNFFLNKKLEGAILWIPAFFLHTSATVTRTLVDFFVEHKGQ----   |
| Esoluc_9    | IQDR-NNFFLNKKLEGAILWIPAFFLHTSATVTRTLVDFFVEHKGQ----   |
| Permag_9    | IQDR-NNFFLNKKLEGAILWIPAFFLHTSATVTRTLVDFFVEHKGQ----   |
| Bolpec_9    | IQDR-NNFFLNKKLEGAILWIPAFFLHTSATVTRTLVDFFVEHKGQ----   |
| Poefor9     | IQDR-NNFFLNKKLEGAILWIPAFFLHTSATVTRTLVDFFVEHKGQ----   |
| Masarm_9    | IQDR-NNFFLSLKKLEGAILWIPAFFLHTSATVTRTLVDFFVEHKGQ----  |
| Angjap_9    | IQDR-NNFFLSLKKLDGVVLWIPAFFHTSATVTRTLVDFFVEHRGQ----   |
| Poelat_9    | IQDR-NNFFLNKKLEGAILWIPAFFLHTSATVTRTLVDFFVEHKGQ----   |
| Poeret_9    | IQDR-NNFFLNKKLEGAILWIPAFFLHTSATVTRTLVDFFVEHKGQ----   |
| Xipmac_9    | IQDR-NNFFLNKKLEGAILWIPAFFLHTSATVTRTLVDFFVEHKGQ----   |
| Hapbur_9    | IQDR-NNFFLNKKLEGAILWIPAFFLHTSATVTRTLVDFFVEHKGQ----   |
| Orylat_9    | IQDR-NNFFLHLKKLEGAILWIPAFFLHTSATVTRTLVDFFVEHKGQ----  |
| Gamaff_9    | IQDR-NNFFLNKKLEGAILWIPAFFLHTSATVTRTLVDFFVEHKGQ----   |
| Neobri_9    | IQDR-NNFFLNKKLEGAILWIPAFFLHTSATVTRTLVDFFVEHKGQ----   |
| Funhet_9    | IQDR-NNFFLNKKLEGAILWIPAFFLHTSATVTRTLVDFFVEHKGQ----   |
| Punnye_9    | IQDR-NNFFLNKKLEGAILWIPAFFLHTSATVTRTLVDFFVEHKGQ----   |
| Cypvar_9    | IQDR-NNFFLNKKLEGAILWIPAFFLHTSATVTRTLVDFFVEHKGQ----   |
| Krymar_9    | IQDR-NNFFLNKKLEGAILWIPAFFLHTSATVTRTLVDFFVEHKGQ----   |
| Notfur_9    | IQDR-NNFFLNKKLEGAILWIPAFFLHTSATVTRTLVDFFVEHKGQ----   |
| Notpie_9    | IQDR-NNFFLNKKLEGAILWIPAFFLHTSATVTRTLVDFFVEHKGQ----   |
| Orenil_9    | IQDR-NNFFLNKKLEGAILWIPAFFLHTSATVTRTLVDFFVEHKGQ----   |
| Auslim_9    | IQDR-NNFFLNKKLEGAILWIPAFFLHTSATVTRTLVDFFVEHKGQ----   |
| Anates_9    | IQDR-NNFFLNKKLEGAILWIPAFFLHTSATVTRTLVDFFVEHKGQ----   |
| Astcal_9    | IQDR-NNFFLNKKLEGAILWIPAFFLHTSATVTRTLVDFFVEHKGQ----   |
| Mayzeb_9    | IQDR-NNFFLNKKLEGAILWIPAFFLHTSATVTRTLVDFFVEHKGQ----   |
| Orymel_9    | IQDR-NNFFLHLKKLEGAILWIPAFFLHTSATVTRTLVDFFVEHKGQ----  |
| Ampcit9     | IQDR-NNFFLNKKLEGAILWIPAFFLHTSATVTRTLVDFFVEHKGQ----   |
| Macfas_2    | ATWR-EKLLQRLHSLNGSILWIPAFMARGGKERVEWVNELILKHH-----   |
| Macmul_2    | ATWR-EKLLQRLHSLNGSILWIPAFMARGGKERVEWVNELILKHH-----   |
| Macnem_2    | ATWR-EKLLQRLHSLNGSILWIPAFMARGGKERVEWVNELILKHH-----   |
| Musmus_2    | ATWR-EKLLQRLHGLNGSILWIPAFMARGGKERVEWVNALILKHH-----   |
| Ponabe_2    | ATWR-EKLLQRLHSLNGSILWIPAFMARGGKERVEWVNELILKHH-----   |
| Papanu_2    | ATWR-EKLLQRLHSLNGSILWIPAFMARGGKERVEWVNELILKHH-----   |
| Nomleu_2    | ATWR-EKLLQRLHSLNGSILWIPAFMARGGKERVEWVNELILKHH-----   |
| Pantro_2    | ATWR-EKLLQRLHSLNGSILWIPAFMARGGKERVEWVNELILKHH-----   |
| Latcha_2    | ETWK-EKFLQRLQSLNGSIFWIPAFMAKGGEERVEWVNDLIIKSG-----   |
| Gnapet2     | QQWR-DHFLQRLRSIAGVLWIPAFMAKGGEERVELAARLILRHG-----    |
| Panbuc_2b   | ESWQ-ERFLQRLDQLGSSVLWIPAFMAKGGEERVEWALDLIRQHA-----   |
| Ostbic_2    | KQWK-GRFLQRLQGLNGSVLWIPAFMAKGGEERVAWAVRLILQHA-----   |
| Sinrhi2     | EEWV-QRFVHRLQSLSGSVLWIPAFMAKGGEERVEWAIIRLILLHT-----  |
| Hetzeb_2    | ETWK-EKLLHRLKMLDGGILWIPAFMAKGGEERVEWVNLI IKHK-----   |
| Hipcom_2    | DEWR-RRFARRLASLSGSVLWIPAFMAKGGEERVEWALRLILRHA-----   |
| Prigla_2    | ETWK-EKLLHRLKMLDDGILWIPAFMAKGGEERVEWVNKLII EHK-----  |
| Scytor_2    | DTWK-EKLLHRLKMLDGGILWIPAFMAKGGEERVEWVNRLII EHK-----  |
| Tetcal_2    | ETWK-EKLLHRLTMLDGA ILWIPAFMAKGGEERVEWVNLI IEHK-----  |
| Rhityp_2    | ETWK-EKLLHRLKMLDGGILWIPAFMAKGGEERVEWVNLI IKHK-----   |
| Parkin_2b   | ARWR-EHFLQRLRGLGDAVLWIPAFMAKGGERVELALDVIRRRQ-----    |
| Angang_2    | EAWR-ERFVRRRLALEGSVLWIPAFMAKGGEDRVEWATRLILRHA-----   |
| Pygnat_2    | EEWR-QRFVQRLQALSGSVLWIPAFMAKGGEERVEWAVRLILSHT-----   |
| Parkin_2    | QLWR-DHFLQRLRSIAGVLWIPAFMAKGGEERVEWALRLILRHS-----    |
| Gorgor_2    | ATWR-EKLLQRLHSLNGSILWIPAFMARGGKERVEWVNELILKHH-----   |
| Thegel_2    | ATWR-EKLLQRLHSLNGSILWIPAFMARGGKERVEWVNELILKHH-----   |
| Tupchi_2    | ATWR-EKLLQRLHSLNGSILWIPAFMARGGKERVEWVNELILKHH-----   |
| Galgai_2    | ETWR-EKLLQRLHSLNGSILWIPAFMAKGGERVEWVNELILKHH-----    |
| Eleele_2    | EEWR-QQFVQRLRELGS SVLWIPAFMAKGGEERVEWAIIRLILSHT----- |
| Danrer_2    | EEWV-QRFVQRLQSLSGSVLWIPAFMAKGGEERVEWAIIRLILLHT-----  |
| Canlupfam_2 | ATWR-EKLLQRLRSLNGSILWIPAFMARGGKERVEWVNELILKHH-----   |
| Aloalo_2    | EEWR-QRFIRRLQDLSGSVLWIPAFMAKGGEERVEWAIIRLILHT-----   |
| Astmex_2    | KEWR-QRFVRRRLQALSGSVLWIPAFMAKSGEDRVEWAVHLILSHT-----  |
| Sinans_2    | EEWV-QRFVHRLQSLSGSVLWIPAFMAKGGEERVEWAIIRLILLHT-----  |
| Scifor_2    | EQWK-GRFLRRLQGLNGSVLWIPAFMAKGGEERVAWAVRLILQHA-----   |
| Ceraty_2    | ATWR-EKLLQRLHSLNGSILWIPAFMARGGKERVEWVNELILKHH-----   |
| Anocar_2    | DTWR-EKLLQRLHSLNGSILWIPAFMAKGGERVEWVNELILKNH-----    |
| Anates_2    | EEWR-ARFLRRLQSLSGSVLWIPAFMAKGGEERVEWALRLILLHT-----   |
| Ambic_2     | EEWT-ERFLQRLRSLSGSVLWIPAFMAKGGEERVEWALRLILLHT-----   |
| Sarpil_2    | EEWR-QRFIRRLQDLSGSVLWIPAFMAKGGEERVEWAIIRLILHT-----   |
| Xenlae_2    | DTWK-DKFLQRLKSLNESILWIPAFMAKGGEERVEWVNDLII KHH-----  |
| Cluhar_2    | EEWR-QRFVRRRLQDLSGSVLWIPAFMAKGGEERVEWAIIRLIIMHT----- |
| Cypcar_2    | EEWV-QRFVHRLQSLSGSVLWIPAFMAKGGEERVEWAIIRLILLHT-----  |
| Denclu_2    | EEWR-ERFVQRLRALSGSVLWIPAFMAKGGEERVEWAIIRLILLHT-----  |
| Notpie_2    | EEWK-ERFLQRLRNLSGSVLWIPAFMAKRGEDRVEWVLRILLHT-----    |
| Erpcal2     | DTWK-DRLLQRLQNLNGSILWIPAFMAKGGEQVELVNSLILKHQ-----    |

|             |                                                     |
|-------------|-----------------------------------------------------|
| Amical_2    | ESWR-ERFLQRLQSLNGSVLWIPAFMAKGGEERVEWANDLILKHH-----  |
| Lepocu_2    | SHWR-ERFLERLSSLNGSVLWIPSFMAKGGEERVQWASELILRHG-----  |
| Homsap_2    | ATWR-EKLLQRLHSLNGSILWIPAFMARGGKERVEWVNELILKHH-----  |
| Bostau_2    | ATWR-EKLLQRLHSLNGSILWIPAFMARGGKQERVEWVNELILKHH----- |
| Caraur_2    | EEWV-QRFVHRLQSLSGSVLWIPAFMAKGGEERVEWAIIRLILLHT----- |
| Thythy_2B   | EEWR-ERFLQRLRGLSGSVLWIPAFMAKGGEERVEWAIIRLILLHT----- |
| Onctsh_2B   | EEWR-ERFLQRLRSLSGSVLWIPAFMAKGGEERVEWAIIRLILLHT----- |
| Salsal_2B   | EEWR-ERFLQRLRGLSGSVLWIPAFMAKGGEERVEWAIIRLILLHT----- |
| Oncmyk_2B   | EEWR-ERFLQRLRSLSGSVLWIPAFMAKGGEERVEWAIIRLILLHT----- |
| Onckis_2B   | EEWR-ERFLQRLQSLSGSVLWIPAFMAKGGEERVEWAIIRLILLHT----- |
| Salsal_2A   | EQWR-ERFLQRLRGLSGSVLWIPAFMAKGGEERVEWAIIRLILLHT----- |
| Thythy_2A   | EQWR-ERFLQRLRGLSGSVLWIPAFMAKGGEERVEWAIIRLILLHT----- |
| Salalp_2A   | EQWR-ERFLQRLRGLSGSVLWIPAFMAKGGEERVEWAIIRLILLHT----- |
| Corlav_2A   | EQWR-ERFLQRLRGLSGSVLWIPAFMAKGGEERVEWAIIRLILLHT----- |
| Cormar_2A   | EQWR-ERFLQRLRGLSGSVLWIPAFMAKGGEERVEWAIIRLILLHT----- |
| Onctsh_2A   | EQWR-ERFLQRLRGLSGSVLWIPAFMAKGGEERVEWAIIRLILLHT----- |
| Oncmyk_2A   | EQWR-ERFLQRLRGLSGSVLWIPAFMAKGGEERVEWAIIRLILLHT----- |
| Neobri_2    | NEWK-ERFLRRLRSLSGSVLWIPAFMAKGGEERVEWALRILLHT-----   |
| Takrub_2    | EEWR-ERFLQRLRSLSGSVLWIPAFMAKGGEERVEWTLRILLHT-----   |
| Tetnig_2    | EEWR-DRFLRRLQSLSGSILWIPAFMAKGGEERVDWTLRILLHT-----   |
| Orenil_2    | DEWK-ERFLRRLRSLSGSVLWIPAFMAKGGEERVEWALRILLHT-----   |
| Orylat_2    | EEWK-QRFQRLQSLGGSVLWIPAFMAKGGEERVEWALRILRHT-----    |
| Krymar_2    | EEWR-ERFLQRLRDLRGGVLWVPAFMAKGGEERVEWALRILLHA-----   |
| Notfur_2    | EEWK-ERFLQRLRNLSGSVLWIPAFMAKRGEDRVEWVLRILLHT-----   |
| Poelat_2    | DEWK-DRFLQRLQNLSGSVLWIPAFMAKGGEERVEWALRILVHT-----   |
| Gadmor_2    | PEWR-ARFVARLQSLRGSVLWIPAFMAKGGEERVEWAARLILLHT-----  |
| Xipmac_2    | DEWK-DRFLQRLQNLSGSVLWIPAFMAKGGEERVEWALRILVHT-----   |
| Poeret_2    | DEWK-DRFLRRLQNLSGSVLWIPAFMAKGGEERVEWALRILVHT-----   |
| Astcal_2    | NEWK-ERFLRRLRSLSGSVLWIPAFMAKGGEERVEWALRILLHT-----   |
| Hapbur_2    | NEWK-ERFLRRLRSLSGSVLWIPAFMAKGGEERVEWALRILLHT-----   |
| Acapol_2B   | EEWT-ERFLQRLRSLSGSVLWIPAFMAKGGEERVEWALRILLHT-----   |
| Ampoce_2A   | EEWT-ERFLQRLRSLSGSVLWIPAFMAKGGEERVEWALRILLHT-----   |
| Acapol_2A   | EEWT-ERFLQRLRSLSGSVLWIPAFMAKGGEERVEWALRILLHT-----   |
| Mayzeb_2    | NEWK-ERFLRRLRSLSGSVLWIPAFMAKGGEERVEWALRILLHT-----   |
| Punnye_2    | NEWK-ERFLRRLRSLSGSVLWIPAFMAKGGEERVEWALRILLHT-----   |
| Latcal_2    | EEWR-DRFLQRLRSLSGSVLWIPAFMAKGGEERVEWALRILLHT-----   |
| Singra_2    | EEWV-QRFVHRLQSLSGSVLWIPAFMAKGGEERVEWAIIRLILLHT----- |
| Auslim_2    | EEWK-ERFLRRLRDLGGSVLWIPAFMAKGGEERVEWALRILLHA-----   |
| Monalb2     | DEWR-ERFLQRLQSLSGSVLWIPAFMAKGGEERVEWALRILLHT-----   |
| Ampoce_2B   | EEWT-ERFLQRLRSLSGSVLWIPAFMAKGGEERVEWALRILLHT-----   |
| Chiham_2    | EEWR-DRFLQRLQSLSGSVLWIPAFMAKGGEERVEWALRILSHT-----   |
| Gasacu_2    | DEWR-DRFLQRLQSLSGSVLWIPAFMAKGGEERVEWALRILSHT-----   |
| Gymacu_2    | EEWR-DRFLQRLQSLSGSVLWIPAFMAKGGEERVEWALRILSHT-----   |
| Labber_2    | EEWR-DRFLQRLQSLSGSVLWIPAFMAKGGEERVEWALRILLHT-----   |
| Cypvar_2    | EEWK-DRFLQRLRDLSGSVLWIPAFMAKGGEERVEWALRILVHT-----   |
| Funhet_2    | DEWK-ERFLQRLRNLSGSVLWIPAFMAKGGEERVEWALRIRVHT-----   |
| Larcro_2    | EEWR-DRFLKRLQSLSGSVLWIPAFMAKGGEERVEWALRILLHT-----   |
| Paroli_2    | DEWR-DRFLQRLQSLSGSVLWIPAFMAKGGEERVEWALRILLHT-----   |
| Perflu_2    | EEWR-DRFLQRLQSLSGSVLWIPAFMAKGGEERVEWALRILLHT-----   |
| Serdum_2    | EEWR-DRFLQRLQSLSGSVLWIPAFMAKGGEERVEWALRILLHT-----   |
| Stepar_2    | EEWK-ERFLQRLRSLSGSVLWIPAFMAKGGEERVEWALRILLHT-----   |
| Notcor_2    | EEWR-DRFLQRLQSLSGSVLWIPAFMAKGGEERVEWALRILSHT-----   |
| Treber_2    | EEWR-DRFLQRLQSLSGSVLWIPAFMAKGGEERVEWALRILSHT-----   |
| Serlaldor_2 | EEWR-DRFLQRLQSLSGSVLWIPAFMAKGGEERVEWALRILLHT-----   |
| Plaste_2    | DEWR-NRFLQRLQSLSGSVLWIPAFMAKGGEERVEWALRILLHT-----   |
| Clabat_4    | ETTR-ERFVQRLRLNDSVLWIPAFMVKGGEKHVEGVNELILKHK-----   |
| Ictpun_4A   | ETVR-ENFVQRLRLNDSVLWIPAFMVKGGEKHVEGVNELILKHK-----   |
| Panhyp_4    | ETVR-ELFVQRLSLNDSVLWIPAFMVKGGEKHVEGVNELILKHK-----   |
| Umbpyg_4    | ATDT-ERFVQRLRMLKDSVLWIPAFMVKGGEQHVERVNELIVKHK-----  |
| Esoluc_4    | ASDM-ERFVQRLRMLNDSVLWIPAFMVKGGERHVESVNELIVKHK-----  |
| Plealt_4    | VSDA-ERFVRLRMLNDSVLWIPAFMVKGGEKHVECVNELIVKHK-----   |
| Onckis_4B   | ATDT-ERFVQRLRGLNDSVLWIPAFMVKGGERHVESVNELIVKHK-----  |
| Onckis_4A   | ATDT-ERFVQRLRGLNDSVLWIPAFMVKGGERHVESVNELIVKHK-----  |
| Onctsh_4    | ATDT-ERFVQRLRGLNDSVLWIPAFMVKGGERHVESVNELIVKHK-----  |
| Oncmyk_4    | ATDT-ERFVQRLRGLNDSVLWIPAFMVKGGERHVESVNELIVKHK-----  |
| Corlav_4    | ATDT-ERFVQRLRMLNDSVLWIPAFMVKGGERHVESVNELIVKHK-----  |
| Astmex_4A   | ETQR-ERFVERLSMLNDSVLWIPAFMVKGGEKHVEGVNELILKHK-----  |
| Pygnat_4    | ETVR-EHFVERLGLNDSVLWIPAFMVKGGEKHVEGVNELILKHK-----   |
| Aloalo_4    | ATDR-ERFVERLRALNDSVLWIPAFMVKGGEKHVEGVNELILQRS-----  |
| Cluhar_4    | ATDR-ERFVERLQALNDSVLWIPAFMVKGGEKHVEGVNELILQRC-----  |
| Denclu_4    | ESDR-EKFVHRLIALNDSVLWIPAFMVKGGEKHVEVVNNFILKQG-----  |
| Konpun4     | STDR-ERFVERLRALNDSVLWIPAFMVKGGEKHVEGVNELILQRC-----  |
| Sarpil_4    | ATDR-ERFVERLRALNDSVLWIPAFMVKGGEKHVEGVNELILQRC-----  |
| Caraur_4    | ERQQ-ERFIRRLQQLNNSVLWIPAFMVKGGERHVEIVNQLILKHK-----  |
| Cteide_4    | ETEQ-ENFILRLQQLNNSVLWIPAFMVKGGERHVEIVNELILKHK-----  |
| Petmar_4    | KADH-DRFGRRRLNSSLWIPAFMAKGGEQHVEIVNNLLTLG-----      |
| Cypcar_4    | ERQR-ERFIQRLQQLNNSVLWIPAFMVKGGERHVEIVNELILKHK-----  |

|              |                                                     |
|--------------|-----------------------------------------------------|
| Danrer_4     | ETQQ-ENLIQRLRLNDSVLWIPAFMVKGGMKHVDTVNELILKHK-----   |
| Misang_4     | KTAQ-EHFIQRLRLNDSVLWIPAFMVKGSEKHVEGVNELILKNK-----   |
| Angjap_4     | DSDR-ERFVRRLLGALNDSVLWIPAFMVKGGERHVECVNDLILRHR----- |
| Cypcar_4A    | ERQR-ERFIQRLQLNNSVLWIPAFMVKGGERHVEIVNELILKHK-----   |
| Angang_4     | DSDR-ERFVRRLLGALNDSVLWIPAFMVKGGERHVECVNDLILRHR----- |
| Cypcar_4B    | ERQR-ERFIRRLQLNNSVLWIPAFMVKGGERHVEIVNQLILKHK-----   |
| Sinans_4A    | ERQR-ESFILRLQLNNSVLWIPAFMVKGGERHVEIVNELILKHK-----   |
| Sinans_4B    | ERQR-VQFIRRLQLNNSVLWIPAFMVKGGERHVEIVNQLILKHR-----   |
| Singra_4A    | ERQQ-ESFIRRLQLNNSVFWIPAFMVKGGERHVETVNELILKHK-----   |
| Aptalb_4     | ETVR-EGFLRRLAALNDSVLWIPAFMVKGGEKHVEGVNELILRRK-----  |
| Eigvir_4     | ETAR-ESFLRRLAALNDSILWIPAFMVKGGEKHVEGVNELILRRK-----  |
| Eleele_4     | ETAR-DCFLLRLAVLNDSVLWIPAFMVKGGEKHVEGVNELILQRK-----  |
| Parhas_4     | VTVR-EGFLRRLAALNDSVLWIPAFMVKGGEKHVEGVNELILRRK-----  |
| Scifor_4     | ESDR-VRFVQRLTMLNESVLWIPAFMVKGGEQHVVERVNELILKNK----- |
| Gnapet4      | ESDR-ERFVQRLIMLNDSILWIPAFMVKGGEKHVEGVNELILNRK-----  |
| Ostbic_4     | ESDR-EKFVQRLIMLNDSILWIPAFMVKGGEQHVHVSELILKNR-----   |
| Parkin_4     | ESDR-ERFVQRLIMLNDSILWIPAFMVKGGEKHVEGVNELILNRK-----  |
| Panbuc_4     | ATDR-QRFVQRLVALNDSVLWIPAFMVKGGEKHVESVNELILKNG-----  |
| Erpcal4      | ETDR-EKFVQRLAMLNDSVLWIPAFMVKGGEKHVEWVNELILKNK-----  |
| Salsal_4     | ATDT-ERFVQRLRGLNDSVLWIPAFMVKGGERHVESVNELIVKRK-----  |
| Saltru_4     | ATDT-ERFVQRLRGLNDSVLWIPAFMVKGGERHVESVNELIVKRK-----  |
| Salalp_4     | ATDT-ERFVERLRGLNDSVLWIPAFMVKGGERHVESVNELIVKRK-----  |
| Salfon_4     | ATDT-ERFVERLRGLNDSVLWIPAFMVKGGERHVESVNELIVKRK-----  |
| Thythy_4     | ATDT-ERFVHRLQVLNDSVLWIPAFMVKGGERHVESVNELIVKRK-----  |
| Calmil_4     | ETDR-ENFVRRLLAVLNDSVLWIPAFMVKGGERHVEWVNELILKNK----- |
| Hetzeb_4     | ETDR-EKFVDRLLAVLNDSVLWIPAFMVKGGEKHVEYVNELILKNR----- |
| Rhityp_4     | ETDR-EKFVDRLLAVLNDSVLWIPAFMVKGGEKHVEYVNELILKNR----- |
| Scytor_4     | ETDR-EKFVDRLLAVLNDSVLWIPAFMVKGGEKHVEYVNELILKNR----- |
| Squaca_4     | ETDR-EKFVDRLLAVLNDSVLWIPAFMVKGGEKHVEYVNELILKNR----- |
| Amical_4     | ETDR-EKFVRRLLTMLNDSVLWIPAFMVKGGEKHVECVNELILKNK----- |
| Lepocu_4     | ETDR-ERFVQRLTLLNDSVLWIPAFMVKGGEKHVECVNELILKNK-----  |
| Agema_4      | ETVR-ERFVQRLSLNDSVLWIPAFMVKGGEKHVEGVNELILKRK-----   |
| Anocar_4     | ESDR-EKFVHRLSMLNDSVLWIPAFMVKGGEKHVEWVNALILKNK-----  |
| Canlupfam_4  | ESDR-EKFVHRLSMLNDSVLWIPAFMVKGGEKHVEWVNALILKNK-----  |
| Crigri_4     | ESDR-AKFVHRLSMLNDSVLWIPAFMVKGGEKHVEWVNALILKNK-----  |
| Galgai_4     | ESDR-EKFGHRLSMLNDSVLWIPAFMVKGGEKHLEWVNALILKNK-----  |
| Mesaur_4     | ESDR-EKFVHRLSMLNDSVLWIPAFMVKGGEKHVEWVNALILKNK-----  |
| Homsap_4     | ESDR-EKFVHRLSMLNDSVLWIPAFMVKGGEKHVEWVNALILKNK-----  |
| Notscuscu_4  | ESDR-EKFVHRLSMLNDSVLWIPAFMVKGGEKHVQWVNALILKNK-----  |
| Psetextex_4  | ESDR-EKFVHRLSMLNDSVLWIPAFMVKGGEKHVQWVNALILKNK-----  |
| Musmus_4     | ESDR-EKFVHRLSMLNDSVLWIPAFMVKGGEKHVEWVNALILKNK-----  |
| Pogvit_4     | ESDR-EKFVHRLSMLNDSVLWIPAFMVKGGEKHVEWVNALILKNK-----  |
| Promuc_4     | ESDR-EKFVHRLSMLNDSVLWIPAFMVKGGEKHVEWVNALILKNK-----  |
| Pantro_4     | ESDR-EKFVHRLSMLNDSVLWIPAFMVKGGEKHVEWVNALILKNK-----  |
| Pytbiv_4     | ESDR-EKFVHRLSMLNDSVLWIPAFMVKGGEKHVEWVNALILKNK-----  |
| Ratnor_2     | ATWR-EKLLQRLHGLNGSILWIPAFMARGGKERVEWVNALILKHH-----  |
| Ratnor_4     | ESDR-EKFVHRLSMLNDSVLWIPAFMVKGGEKHVEWVNALILKNK-----  |
| Siltro_2     | DTWK-DKFLQRLKSLNESILWIPAFMAKGGEERVEWVNDLIKHH-----   |
| Siltro_4     | ESDR-EKFVHRLSMLNDSVLWIPAFMVKGGEKHVEWVNALILKNQ-----  |
| Susscr_4     | ESDR-EKFVHRLSMLNDSVLWIPAFMVKGGEKHVEWVNALILKNK-----  |
| Taegut_4     | ESDR-EKFVHRLSMLNDSVLWIPAFMVKGGEKHVEWVNALILKNK-----  |
| Termextri_4M | ESDR-EKFVHRLSMLNDSVLWIPAFMVKGGEKHVEWVNALILKNK-----  |
| Thasirsir_4  | ESDR-EKFVHRLSMLNDSVLWIPAFMVKGGEKHVEWVNALILKNK-----  |
| Xenlae_4B    | ESDR-EKFVHRLSMLNDSVLWIPAFMVKGGEKHVEWVNALILKNQ-----  |
| Xenlae_4A    | ESDR-EKFVHRLSMLNDSVLWIPAFMVKGGEKHVEWVNALILKNQ-----  |
|              | 151                                                 |
| Latcal_3     | LKVQLAWPGN-IMQYINNYWKTQKLSPKRLSTGILMYT----LASSMCDQ  |
| Perflu_3     | LKVQLAWPGN-IMQYVNSYWKTQKLSPKRLSTGILMYT----LASSMCDQ  |
| Serdu_3      | LKVQLAWPGN-IMQYINNYWKTQKLSPKRLSTGILMYT----LASSMCDQ  |
| Stepar_3     | LKVQLAWPGN-IMQYINNYWKTQKLSPKRLSTGILMYT----LASSMCDQ  |
| Tetcal_3     | LKVQLAWPGN-IMQHINKYWKTQKLSPKRLSTGILMYT----LASAICEE  |
| Monalb_3     | LKVQLAWPGN-IMQYINNYWKTQKLSPKRLSTGILMYT----LASSMCDQ  |
| Molmol_3     | LKVQLAWPGN-IMQYINNYWKTQKLSPKRLSTGILMYT----LASSMCDQ  |
| Takrub_3     | LKVQLAWPGN-IMQYINNYWKTQKLSPKRLSTGILMYT----LASSMCDQ  |
| Canlupfam_3  | LKVQLAWPGN-IMQHVNRWYWKNHLSPKRLSTGILMYT----LASAICEE  |
| Bostau_3     | LKQLAWPGN-IMQHVNRWYWKNHLSPKRLSTGILMYT----LASAVCEE   |
| Homsap_3     | LKVQLAWPGN-IMQHVNRWYWKNHLSPKRLSTGILMYT----LASAICEE  |
| Siltro_3     | LKVQLDWPNG-IMQHVNRWYWKNHLSPKRLSTGILMYT----LASSVCEE  |
| Anocar_3     | LKVQLAWPGN-IMQHVNRWYWKNHLSPKRLSTGILMYT----LASAICDE  |
| Musmus_3     | LKVQLAWPGN-IMQHVNRWYWKNHLSPKRLSTGILMYT----LASAICEE  |
| Pantro_3     | LKVQLAWPGN-IMQHVNRWYWKNHLSPKRLSTGILMYT----LASAICEE  |
| Ratnor_3     | LKVQLAWPGN-IMQHVNRWYWKNHLSPKRLSTGFLMYT----LASAICEE  |
| Galgai_3     | LKVQLAWPGN-IMQHVNRWYWKNHLSPKRLSTGILMYT----LASAICEE  |
| Lepocu_3     | LKVQLAWPGN-IMQYVNRWYWKTHLAPKRLSTGILMYT----LASAMCEE  |
| Tetnig_3     | LKVQLAWPGN-IMQYINNYWKTQKLSPKRLSTGILMYT----LASSMCEE  |
| Squaca_3     | LKVQLAWPGN-IMQHINKYWKTQKLSPKRLSTGILMYT----LASAICEE  |
| Perfla_3     | LKVQLAWPGN-IMQYVNSYWKTQKLSPKRLSTGILMYT----LASSMCDQ  |

|             |                                                    |
|-------------|----------------------------------------------------|
| Salsal_3    | LKVQLAWPGN-IMQYVNRYWKTQLSPKRLSTGILMYT----LASSMCEE  |
| Serlaldor_3 | LKVQLAWPGN-IMQYINNYWKTQLSPKRLSTGILMYT----LASSMCDQ  |
| Treber_3    | LKVELAWPGN-IMHDVNKYWKTKNLSPKRLSTGILMYT----LASAMCEE |
| Cynsem_3    | LKVQLAWPGN-IMQYIN-----STGILMYT----LASSMCDQ         |
| Paroli_3    | LKVQLAWPGN-IMHDVNKYWKTKNLSPKRLSTGILMYT----LAYAMCEE |
| Paroli_3b   | LKVQLAWPGN-IMQYINNYWKTQLSPKRLSTGILMYT----LASSMCDQ  |
| Plaste_3    | LKVQLAWPGN-IMHDVNKYWKTKNLSPKRLSTGILMYT----LAYAMCEE |
| Plaste_3b   | LKVQLAWPGN-IMQYINSYWKTQLSPKRLSTGILMYT----LASSMCDQ  |
| Erpcal3     | LKVQLAWPGN-IMQHINRYWKTQHLAPKRLSTGILMYT----LASAMCEE |
| Calmil_3b   | LKVELAWPGN-IMQYVNKYWKTQLSPKRLSTGILMYT----LASSVCEE  |
| Hetzeb_3    | LKVQLAWPGN-IMQHINKYWKTQLSPKRLSTGILMYT----LASAICEE  |
| Latcha_3    | LKLQLAWPGN-IMQHVNRWYWKHLSPKRLSTGILMYT----LASAMCQE  |
| Anates_3    | LNVLAWPGN-IMQYINNYWKTQLSPKRLSTGILMYT----LASSMCDQ   |
| Ampcit3     | LKVQLAWPGN-IMKYVNNYWKTQLSPKRLSTGILMYT----LASSMCDQ  |
| Auslim_3    | LKVQLAWPGN-IMQYINNYWKTQLSPKRLSTGILMYT----LASSMCDQ  |
| Cypvar_3    | LKVQLAWPGN-IMQYINNYWKTQLSPKRLSTGILMYT----LASSMCDQ  |
| Krymar_3    | LKVQLAWPGN-IMQYINNYWKTQLSPKRLSTGILMYT----LASSMCDQ  |
| Funhet_3    | LKVQLAWPGN-IMQYINNYWKTQLSPKRLSTGILMYT----LASSMCDQ  |
| Gamaff3     | LKVQLAWPGN-IMQHINNYWKTQLSPKRLSTGILMYT----LASSMCDQ  |
| Orylat_3    | LKVQLAWPGN-IMQYINNYWKTQLSPKRLSTGILMYT----LASSMCDQ  |
| Orenil_3    | LKVQLAWPGN-IMKYVNNYWKTQLSPKRLSTGILMYT----LASSMCDQ  |
| Mayzeb_3    | LKVQLAWPGN-IMKYVNNYWKTQLSPKRLSTGILMYT----LASSMCDQ  |
| Punnye_3    | LKVQLAWPGN-IMKYVNNYWKTQLSPKRLSTGILMYT----LASSMCDQ  |
| Punnye_3a   | LKVQLAWPGN-IMKYVNNYWKTQLSPKRLSTGILMYT----LASSMCDQ  |
| Neobri_3    | LKVQLAWPGN-IMKYVNNYWKTQLSPKRLSTGILMYT----LASSMCDQ  |
| Misang_3    | LKVQLAWPGN-IMQYVNRYWKTQHLSPKRLSTGILMFT----LASSMCEE |
| Sinrhi3     | LKVQLAWPGN-IMQYVNRYWKTQLSPKRLSTGILMFT----LASSLCEQ  |
| Singra_3    | LKVQLAWPGN-IMQYVNRYWKTQLSPKRLSTGILMFT----LASSLCEQ  |
| Hapbur_3    | LKVQLAWPGN-IMKYVNNYWKTQLSPKRLSTGILMYT----LASSMCDQ  |
| Astcal_3    | LKVQLAWPGN-IMKYVNNYWKTQLSPKRLSTGILMYT----LASSMCDQ  |
| Notfur_3    | LKVQLAWPGN-IMQYINNYWKTQLSPKRLSTGILMYT----LASSMCDQ  |
| Cypcar_3    | LKVQLAWPGN-IMQYVNRYWKTQLSPKRLSTGILMYT----LASSMCDQ  |
| Poefor3     | LKVQLAWPGN-IMQYINNYWKTQLSPKRLSTGILMYT----LASSMCDQ  |
| Poelat_3    | LKVQLAWPGN-IMQYINNYWKTQLSPKRLSTGILMYT----LASSMCDQ  |
| Poeret_3    | LRVQLAWPGN-IMQYINNYWKTQLSPKRLSTGILMYT----LASSMCDQ  |
| Angang_3    | LKVQLAWPGN-IMQYVNRYWKTQLSPKRLSTGILMYT----LASAMCEE  |
| Xipmac_3    | LKVQLAWPGN-IMQHINNYWKTQHLSPKRLSTGILMYT----LASSMCDQ |
| Masarm_3    | LKVQLAWPGN-IMQYINNYWKTQLSPKRLSTGILMYT----LASSMCDQ  |
| Permag_3    | LNVLAWPGN-IMQYINNYWKTQLSPKRLSTGILMYT----LASSMCDQ   |
| Gnapet3     | LKVQLAWPGN-IMQYVNRYWKTQLSPKRLSTGILVYT----LAAAMCEE  |
| Ostbic_3    | LKVQLAWPGN-IMQHVNRFWKTQLSPKRLSTGILMYT----LASGMCDQ  |
| Gadmor_3    | LKVQLAWPGN-IMQYVNSYWKTQLSPKRLSTGILMYT----LASSMCDQ  |
| Scifor_3    | LKVQLAWPGN-IMQHIFRWKTQHLSPKRLSTGILMYT----LASAMCDQ  |
| Acapol3     | LKVQLAWPGN-IMQYINNYWKTQLSPKRLSTGILMYT----LASSMCDQ  |
| Ampoce_3    | LKVQLAWPGN-IMQYINNYWKTQLSPKRLSTGILMYT----LASSMCDQ  |
| Scifor_3b   | LKVQLAWPGN-IMKFFNRYWKTQLSPKRLSTGILMYT----LASVMCEE  |
| Ostbic_3b   | LKVQLAWPGN-IMKFFNRYWKTQLSPKRLSTGILMYT----LASAMCEE  |
| Parkin_3    | LKVQLAWPGN-IMQYVNRYWKTQLSPKRLSTGILVYT----LAAAMCEE  |
| Ampper3     | LKVQLAWPGN-IMQYINNYWKTQLSPKRLSTGILMYT----LASSMCDQ  |
| Oncmyk_3    | LKVQLAWPGN-IMQYINRYWKTQLSPKRLSTGILMYT----LASSMCEE  |
| Gasacu_3    | LKVQLAWPGN-IMQYVNSYWKTQLSPKRLSTGILMYT----LASTMCDQ  |
| Labber_3    | LKVQLAWPGN-IMQYINSYWKTQLSPKRLSTGILMYT----LASSMCDQ  |
| Panbuc_3    | LKMRLAWPGN-IMQYFNSYWKTQLSPKRLSTGILMYT----LASAMCEE  |
| Parhas3     | LRVQLAWPGN-IMKYINRYWKTQLSPKRLSTGILMFT----LASSVCEE  |
| Cluhar_3    | LKVQLAWPGN-IMQYVNRYWKTQLSPKRLSTGILMYT----LASSLCEQ  |
| Aloalo_3    | LKVQLAWPGN-IMQYVNRYWKTQLSPKRLSTGILMYT----LASSLCEQ  |
| Panhyp_3    | LRVQLAWPGN-IMQYVNRYWKTQLSPKRLSTGILMFT----LASSLCEQ  |
| Eleele_3    | LRVQLAWPGN-IMTYINRYWKTQLSPKRLSTGILMFT----LASSMCKQ  |
| Denclu_3    | LKVQLAWPGN-IMQYVNRYWKTQLSPKRLSTGILMYT----LASSLCEQ  |
| Sarpil_3    | LKVQLAWPGN-IMQYVNRYWKTQLSPKRLSTGILMYT----LASSLCEQ  |
| Eigvir_3    | LRVQLAWPGN-IMKYINRYWKTQLSPKRLSTGILMFT----LASSVCEE  |
| Aptalb_3    | LRVQLAWPGN-IMKYINRYWKTQLSPKRLSTGILMFT----LASSVCEE  |
| Sinans_3    | LKVQLAWPGN-IMQYVNRYWKTQLSPKRLSTGILMFT----LASSLCEQ  |
| Pygnat_3    | LRVQLAWPGN-IMQYVNRYWKTQLSPKRLSTGILMFT----LASSLCEQ  |
| Astmex_3    | LRVQLAWPGN-IMQYVNRYWKTQLSPKRLSTGILMFT----LASSLCEQ  |
| Caraur_3    | LKVQLAWPGN-IMQYVNRYWKTQLSPKRLSTGILMFT----LASSLCEQ  |
| Danrer_3    | LKVQLAWPGN-IMQYVNRYWKTQLSPKRLSTGILMFT----LASSLCEQ  |
| Ictpun_3    | LRVQLAWPGN-IMQYVNRYWKTQLAPKRLSTGILMFT----LASSLCEQ  |
| Plealt_3    | LKVQLAWPGN-IMQYVNRYWKTQLSPKRLSTGILMYT----LASSMCEE  |
| Plealt_9    | LKVELAWPGN-IMHDVNKYWKTKNLSPKRLSTGILMYT----LASAMCEE |
| Gasacu_9    | LKVELAWPGN-IMHDVNKYWKTKNLSPKRLSTGILMYT----LASAMCEE |
| Parkin_9    | LNVLAWPGN-IMHYINSYWKTQLSPKRLSTGILMYT----LASAMCEE   |
| Acapol_9    | LKVELAWPGN-IMHDVNKYWKTKNLSPKRLSTGILMYT----LASAMCEE |
| Larcro_9    | LKVELAWPGN-IMHDVNKYWKTKNLSPKRLSTGILMYT----LASAMCEE |
| Notcor_9    | LKVELAWPGN-IMHDVNKYWKTKNLSPKRLSTGILMYT----LASAMCEE |
| Latcal_9    | LKVELAWPGN-IMHDVNKYWKTKNLSPKRLSTGILMYT----LAYAMCEE |
| Serlaldor_9 | LKVELAWPGN-IMHDVNKYWKTKNLSPKRLSTGILMYT----LAYAMCEE |

|            |                                                    |
|------------|----------------------------------------------------|
| Monalb_9   | LKVDLAWPGN-IMHNINKYWTKSLSPKRLSTGILMYT----LATAMCDE  |
| Serdum_9   | LKVELAWPGN-IMHDVNKYWTKNLSPKRLSTGILMYT----LAYAMCDE  |
| Perflu_9   | LKIELAWPGN-IMHDVNKYWTKNLSPKRLSTGILMYT----LASAMCDE  |
| Perfla_9   | LKIELAWPGN-IMHDVNKYWTKNLSPKRLSTGILMYT----LASAMCDE  |
| Stepar_9   | LKVELAWPGN-IMHDVNKYWTKNLSPKRLSTGILMYT----LASAMCDE  |
| Molmol_9   | LKVELAWPGN-IMHDVNKYWTKNLSPKRLSTGILMYT----LASAMCDE  |
| Hipcom_9   | LKVELAWPGN-IMHDVNKYWTKNLSPKRLSTGILMYT----LASAMCDE  |
| Takrub_9 B | LKVELAWPGN-IMHDVNKYWTKNLSPKRLSTGILMYT----LASAMCDE  |
| Takrub_9   | LKVELAWPGN-IMHDVNKYWTKNLSPKRVSTGIFMYT----LASAMCDE  |
| Cynsem_9   | LKVKLAWPGN-IMHDVNKYWTKNLSPKRLSTGILMYT----LAYAMCDE  |
| Scomax_9   | LKVKLAWPGN-IMHDVNKYWTKNLSPKRLSTGILMYT----LAYAMCDE  |
| Corlav_9   | LKIELAWPGN-IMQDVNKYWTKNLSPKRLSTGILMYT----LASAMCEE  |
| Oncmyk_9   | LKIELAWPGN-IMQDVNKYWTKNLSPKRLSTGILMYT----LASAMCEE  |
| Salsal_9   | LKIELAWPGN-IMQDVNKYWTKNLSPKRLSTGILMYT----LASAMCEE  |
| Onctsh_9   | LKVELAWPGN-IMQDVNKYWTKNLSPKRLSTGILMYT----LASAMCEE  |
| Salalp_9   | LKIELAWPGN-IMQDVNKYWTKNLSPKRLSTGILMYT----LASAMCEE  |
| Ampoce_9   | LKVELAWPGN-IMHDVNKYWTKNLSPKRLSTGILMYT----LASAMCDE  |
| Ampper9    | LKVELAWPGN-IMHDVNKYWTKNLSPKRLSTGILMYT----LASAMCDE  |
| Labber_9   | LKVELAWPGN-IMHDVNKYWTKNLSPKRLSTGILMYT----LASAMCDE  |
| Umbpyg_3B  | LKVKLAWPGN-IMHYVNRYWTKHLSPKRLSTGILMYT----LASAMCEE  |
| Esoluc_3b  | LKVQLAWPGN-IMHYINRYWTKQLSPKRLSTGILMYT----LASAMCEE  |
| Gadmor_9   | LKIELAWPGN-IMQDVNKYWTKNLSPKRLSTGILMYT----LASAMCEE  |
| Umbpyg_9   | LKVELAWPGN-IMQDVNKYWTKNLSPKRLSTGILMYT----LASAMCEE  |
| Esoluc_9   | LKVELAWPGN-IMQDVNKYWTKNLSPKRLSTGILMYT----LASAMCEE  |
| Permag_9   | LKVELAWPGN-IMHDVNKYWRTKNLSPKRLSTGILMYT----LASAMCDE |
| Bolpec_9   | LKVELAWPGN-IMHDVNKYWRTKNLSPKRLSTGILMYT----LASAMCDE |
| Poefor9    | LKVELAWPGN-IMHDVNKYWTKNLSPKRLSTGILMYT----LASAMCDE  |
| Masarm_9   | LKVELAWPGN-IMHDVNKYWTKNLSPKRLSTGILMYT----LASAMCDE  |
| Angjap_9   | LKVQLAWPGN-IMQYVNRYWTKRLSPKRLSTGILMYT----LASAMCEE  |
| Poelat_9   | LKVELAWPGN-IMHDVNKYWTKNLSPKRLSTGILMYT----LASAMCDE  |
| Poeret_9   | LKVELAWPGN-IMHDVNKYWTKNLSPKRLSTGILMYT----LASAMCDE  |
| Xipmac_9   | LKIELAWPGN-IMHDVNKYWTKNLSPKRLSTGILMYT----LASAMCDE  |
| Hapbur_9   | LKIELAWPGN-IMHDVNKYWTKNLSPKRLSTGILMYT----LASAICDE  |
| Orylat_9   | LKVELAWPGN-IMHNVNKYWTKNLSPKRLSTGILMYT----LAFSMCDE  |
| Gamaff_9   | LKVELAWPGN-IMHDVNKYWTKNLSPKRLSTGILMYT----LASAMCDE  |
| Neobri_9   | LKIELAWPGN-IMHDVNKYWTKNLSPKRLSTGILMYT----LASAICDE  |
| Funhet_9   | LKVELAWPGN-IMHDVNKYWTKNLSPKRLSTGILMYT----LAYAMCDE  |
| Punnye_9   | LKIELAWPGN-IMHDVNKYWTKNLSPKRLSTGILMYT----LASAICDE  |
| Cypvar_9   | LKVELAWPGN-IMHDVNKYWTKNLSPKRLSTGILMYT----LAYAMCDE  |
| Krymar_9   | LKVELAWPGN-IMHDVNKYWTKNLSPKRLSTGILMYT----LASAMCDE  |
| Notfur_9   | LKVELAWPGN-IMHDVNKYWTKNLSPKRLSTGILMYT----LASAMCDE  |
| Notpie_9   | LKVELAWPGN-IMHDVNKYWTKNLSPKRLSTGILMYT----LASAMCDE  |
| Orenil_9   | LKIELAWPGN-IMHDVNKYWTKNLSPKRLSTGILMYT----LASAICDE  |
| Auslim_9   | LKVELAWPGN-IMQDVNKYWTKNLSPKRLSTGILMYT----LASAMCDE  |
| Anates_9   | LKVELAWPGN-IMHDVNKYWTKNLSPKRLSTGILMYT----LAYAMCDE  |
| Astcal_9   | LKIELAWPGN-IMHDVNKYWTKNLSPKRLSTGILMYT----LASAICDE  |
| Mayzeb_9   | LKIELAWPGN-IMHDVNKYWTKNLSPKRLSTGILMYT----LASAICDE  |
| Orymel_9   | LKVELAWPGN-IMHNVNKYWTKNLSPKRLSTGILMYT----LAFAMCDE  |
| Ampcit9    | LKIELAWPGN-IMHDVNKYWTKNLSPKRLSTGILMYT----LASAICDE  |
| Macfas_2   | VNVRTAYPSLRLHLAVRGYWLTKNVHIKRPTTGILMYT----LATRFCNQ |
| Macmul_2   | VNVRTAYPSLRLHLAVRGYWLTKNVHIKRPTTGILMYT----LATRFCNQ |
| Macnem_2   | VNVRTAYPSLRLHLAVRGYWLTKNVHIKRPTTGILMYT----LATRFCNQ |
| Musmus_2   | VNVRTAYPSLRLHLAVRGYWLTKNVHIKRPTTGILMYT----LATRFCNQ |
| Ponabe_2   | VNVRTAYPSLRLHLAVRGYWLTKNVHIKRPTTGILMYT----LATRFCNE |
| Papanu_2   | VNVRTAYPSLRLHLAVRGYWLTKNVHIKRPTTGILMYT----LATRFCNQ |
| Nomleu_2   | VNVRTAYPSLRLHLAVRGYWLTKNVHIKRPTTGILMYT----LATRFCNQ |
| Pantro_2   | VNVRTAYPSLPLHLAVRGYWLTKNVHIKRPTTGILMYT----LATRFCNQ |
| Latcha_2   | INVQTAYPSLRLHLAVRGYWLTKNVLIKRPTTGILMYT----LATRFCSE |
| Gnapet2    | LNVRPAFPSLRLLDVAVRGYWLTKNVQIKRPTTGILMYT---MATRFCDE |
| Panbuc_2b  | VHVRPAFPSLRLHLAVRGYWLTKNVHIKRPTTGILMYT----LATRFCNQ |
| Ostbic_2   | INVHTAFPSLRLHLAVRGYWLTKNVQIKRPTTGILMYT---MATRFCDE  |
| Sinrhi2    | VNVRTAFPSLRLHLAVRGYWLTKNVQIKRPTTGILMYT---MATRFCDE  |
| Hetzeb_2   | IRVQTAYPSLRLHLAVRGYWLTKNRILIKRPTTGILMYT---LATRFCDE |
| Hipcom_2   | ADVRTAFPSLRLHLAVRGYWLTKNVHIKRPTTGILMYT---MATRFCDE  |
| Prigla_2   | IHVQTAYPSLRLHLAVRGYWLTKNRVLIKRPTTGILMYT---LATRFCDE |
| Scytor_2   | IHVQTAYPSLRLHLAVRGYWLTKNRVLIKRPTTGILMYT---LATRFCDE |
| Tetcal_2   | IHVQTAYPSLRLHLAVRGYWLTKNRVFIKRPTTGILMYT---LATRFCDE |
| Rhityp_2   | LHVQTAYPSLRLHLAVRGYWLTKNVLIKRPTTGILMYT---LATRFCDE  |
| Parkin_2b  | LAVRPAFPSLRLLDVAVRGYWLTKNVHIKRPTTGILMYT---MATRFCDE |
| Angang_2   | LNVRPAFPSLRLHLAVRGYWLTKNVLIKRPTTGILMYT---MATRFCDE  |
| Pygnat_2   | VNVHTAFPSLRLHLAVRGYWLTKNVQIKRPTTGILMYT---MATRFCDE  |
| Parkin_2   | LDVRPAFPSLRLLDVAVRGYWLTKNVQIKRPTTGILMYT---MATRFCDE |
| Gorgor_2   | VNVRTAYPSLRLHLAVRGYWLTKNVHIKRPTTGILMYT---LATRFCNQ  |
| Thegel_2   | VNVRTAYPSLRLHLAVRGYWLTKNVHIKRPTTGILMYT---LATRFCNQ  |
| Tupchi_2   | VNVRTAYPSLRLHLAVRGYWLTKNVHIKRPTTGILMYT---LATRFCNQ  |
| Galgai_2   | INVRTAYPSLRLHLAVRGYWLTKNVHIKRPTTGILMYT---LATRFCNR  |
| Eleele_2   | GNVHAAPPSLRLHLAVRGYWLTKNIQIKRPTTGILMYT---MATRFCDE  |

|             |                                                     |
|-------------|-----------------------------------------------------|
| Danrer_2    | VNVRTAFPSLRLLHAVRGYWLTNHVQIKRPTTGLLMYT----MATRFCDE  |
| Canlupfam_2 | VNVRTAYPSLRLLHAVRGYWLTNKVHIKRPTTGLLMYT----LATRFCNQ  |
| Aloalo_2    | VNVRTAFPSLRLLHAVRGYWLTNQVQIKRPTTGLLMYT----MATRFCDE  |
| Astmex_2    | VSVHAAPSLRLLHAVRGYWLTNNIQIKRPTTGLLMYT----MATRFCEE   |
| Sinans_2    | VNVRTAFPSLRLLHAVRGYWLTNHVQIKRPTTGLLMYT----MATRFCDE  |
| Scifor_2    | INVHTAFPSLRLLHAVRGYWLTTNNVQIKRPTTGLLMYT----MATRFCEQ |
| Ceraty_2    | VNVRTAFPSLRLLHAVRGYWLTNKVHIKRPTTGLLMYT----LATRFCNQ  |
| Anocar_2    | INVRTAYPSLRLLHAVRGYWLTNKVYIKRPTTGLLMYT----LATRFCNR  |
| Anates_2    | VDVRTAFPSLRLLHAVRGYWLTTNNVHIKRPTTGLLMYT----MATRFCEE |
| Ampbic_2    | VDVRTAFPSLRLLHAVRGYWLTTNNVHIKRPTTGLLMYT----MATRFCEE |
| Sarpil_2    | VNVRTAFPSLRLLHAVRGYWLTNQVQIKRPTTGLLMYT----MATRFCDE  |
| Xenlae_2    | INVHTAYPSLRLLHAVRGYWLTNKVHIKRPTTGILMYT----LATRFCNR  |
| Cluhar_2    | VNVRTAFPSLRLLHAVRGYWLTNQVQIKRPTTGLLMYT----MATRFCDE  |
| Cypcar_2    | VNVRTAFPSLRLLHAVRGYWLTNHVQIKRPTTGLLMYT----MATRFCDE  |
| Denclu_2    | VNVRTAFPSLRLLHAVRGYWLTNQVLIKRPTTGLLMYT----MATRFCEE  |
| Notpie_2    | VDVRMAFPSLRLLHAVRGYWLTTNNVHIKRPTTGLLMYT----MATRFCEE |
| Erpcal2     | INVQTAYPSLRLLYAVRGYWLTNKVPIKRPTTGLLMYT----LATRFCDE  |
| Amical_2    | INVRTAFPSLRLLHAVRGYWLTNKVPIKRPTTGMLMYT----LATRFCEE  |
| Lepocu_2    | INVRTAFPSLRLLHAVRGYWLTNKVPIKRPTTGLLMYT----LATRFCEE  |
| Homsap_2    | VNVRTAYPSLRLLHAVRGYWLTNKVHIKRPTTGLLMYT----LATRFCQK  |
| Bostau_2    | VNVRTAYPSLRLLHAVRGYWLTNKVHIKRPTTGLLMYT----LATRFCNQ  |
| Caraur_2    | VNVRTAFPSLRLLHAVRGYWLTNQVQIKRPTTGLLMYT----MATRFCDE  |
| Thythy_2B   | VDVHTAFPSLRLLHAVRGYWLTTNNVQIKRPTTGLLMYT----MATRFCEE |
| Onctsh_2B   | VDVHTAFPSLRLLHAVRGYWLTTNNVQIKRPTTGLLMYT----MATRFCEE |
| Salsal_2B   | VDVHTAFPSLRLLHAVRGYWLTTNNVQIKRPTTGLLMYT----MATRFCEE |
| Oncmyk_2B   | VDVHTAFPSLRLLHAVRGYWLTTNNVQIKRPTTGLLMYT----MATRFCEE |
| Onckis_2B   | VDVHTAFPSLRLLHAVRGYWLTTNNVQIKRPTTGLLMYT----MATRFCEE |
| Salsal_2A   | VDVHTAFPSLRLLHAVRGYWLTTNNVQIKRPTTGLLMYT----MATRFCEE |
| Thythy_2A   | VDVHTAFPSLRLLHAVRGYWLTTNNVQIKRPTTGLLMYT----MATRFCEE |
| Salalp_2A   | VDVHTAFPSLRLLHAVRGYWLTTNNVQIKRPTTGLLMYT----MATRFCEE |
| Corlav_2A   | VDVHTAFPSLRLLHAVRGYWLTTNNVQIKRPTTGLLMYT----MATRFCEE |
| Cormar_2A   | VDVHTAFPSLRLLHAVRGYWLTTNNVQIKRPTTGLLMYT----MATRFCEE |
| Onctsh_2A   | VDVHTAFPSLRLLHAVRGYWLTTNNVQIKRPTTGLLMYT----MATRFCEE |
| Oncmyk_2A   | VDVHTAFPSLRLLHAVRGYWLTTNNVQIKRPTTGLLMYT----MATRFCEE |
| Neobri_2    | VDVRTAFPSLRLLHAVRGYWLTTNNVHIKRPTTGLLMYT----MATRFCEE |
| Takrub_2    | VDVRTAFPSLRLLHAVRGYWLTTNNVHIKRPTTGLLMYT----MATRFCEE |
| Tetnig_2    | VDVRTAFPSLRLLHAVRGYWLTTNNVHIKRPTTGLLMYT----MATRFCEE |
| Orenil_2    | VDVRTAFPSLRLLHAVRGYWLTTNNVHIKRPTTGLLMYT----MATRFCEE |
| Orylat_2    | VDVRTAFPSLRLLHAVRGYWLTTNNVHIKRPTTGLLMYT----MATRFCEE |
| Krymar_2    | VDVRMAFPSLRLLHAVRGYWLTTNNVHIKRPTTGLLMYT----MATRFCEE |
| Notfur_2    | VDVRMAFPSLRLLHAVRGYWLTTNNVHIKRPTTGLLMYT----MATRFCEE |
| Poelat_2    | VDVRTAFPSLRLLHAVRGYWLTTNNVHIKRPTTGLLMYT----MATRFCEE |
| Gadmor_2    | VGIRTAFPSLRLLHAVRGYWLTTNNVQIKRPTTGLLMYT----MATRFCEE |
| Xipmac_2    | VDVRTAFPSLRLLHAVRGYWLTTNNVHIKRPTTGLLMYT----MATRFCEE |
| Poeret_2    | VDVRTAFPSLRLLHAVRGYWLTTNNVHIKRPTTGLLMYT----MATRFCEE |
| Astcal_2    | VDVRTAFPSLRLLHAVRGYWLTTNNVHIKRPTTGLLMYT----MATRFCEE |
| Hapbur_2    | VDVRTAFPSLRLLHAVRGYWLTTNNVHIKRPTTGLLMYT----MATRFCEE |
| Acapol_2B   | VDVRTAFPSLRLLHAVRGYWLTTNNVHIKRPTTGLLMYT----MATRFCEE |
| Ampoce_2A   | VDVRTAFPSLRLLHAVRGYWLTTNNVHIKRPTTGLLMYT----MATRFCEE |
| Acapol_2A   | VDVRTAFPSLRLLHAVRGYWLTTNNVHIKRPTTGLLMYT----MATRFCEE |
| Mayzeb_2    | VDVRTAFPSLRLLHAVRGYWLTTNNVHIKRPTTGLLMYT----MATRFCEE |
| Punnye_2    | VDVRTAFPSLRLLHAVRGYWLTTNNVHIKRPTTGLLMYT----MATRFCEE |
| Latcal_2    | VDVRTAFPSLRLLHAVRGYWLTTNNVHIKRPTTGLLMYT----MATRFCEE |
| Singra_2    | VNVRTAFPSLRLLHAVRGYWLTNHVQIKRPTTGLLMYT----MATRFCDE  |
| Auslim_2    | VDVRMAFPSLRLLHAVRGYWLTTNNVHIKRPTTGLLMYT----MATRFCEE |
| Monalb2     | VDVRTAFPSLRLLHAVRGYWLTTNNVHIKRPTTGLLMYT----LATRFCEE |
| Ampoce_2B   | VDVRTAFPSLRLLHAVRGYWLTTNNVHIKRPTTGLLMYT----MATRFCEE |
| Chiham_2    | VDVRTAFPSLRLLHAVRGYWLTTNNVHIKRPTTGLLMYT----MATRFCEE |
| Gasacu_2    | VDVRTAFPSLRLLHAVRGYWLTTNNVHIKRPTTGLLMYT----MATRFCEE |
| Gymacu_2    | VDVRTAFPSLRLLHAVRGYWLTTNNVHIKRPTTGLLMYT----MATRFCEE |
| Labber_2    | VDVRTAFPSLRLLHAVRGYWLTTNNVHIKRPTTGLLMYT----MATRFCEE |
| Cypvar_2    | VDVRTAFPSLRLLHAVRGYWLTTNNVHIKRPTTGLLMYT----MATRFCEE |
| Funhet_2    | VDVRTAFPSLRLLHAVRGYWLTTNNVHIKRPTTGLLMYT----MATRFCEE |
| Larcro_2    | VDVRTAFPSLRLLHAVRGYWLTTNNVHIKRPTTGLLMYT----MATRFCEE |
| Paroli_2    | VDVRTAFPSLRLLHAVRGYWLTTNNVHIKRPTTGLLMYT----MATRFCEE |
| Perflu_2    | VDVRTAFPSLRLLHAVRGYWLTTNNVHIKRPTTGLLMYT----MATRFCEE |
| Serdum_2    | VDVRTAFPSLRLLHAVRGYWLTTNNVHIKRPTTGLLMYT----MATRFCEE |
| Stepar_2    | VDVRTAFPSLRLLHAVRGYWLTTNNVHIKRPTTGLLMYT----MATRFCEE |
| Notcor_2    | VDVRTAFPSLRLLHAVRGYWLTTNNVHIKRPTTGLLMYT----MATRFCEE |
| Treber_2    | VDVRTAFPSLRLLHAVRGYWLTTNNVHIKRPTTGLLMYT----MATRFCEE |
| Serlaldor_2 | VDVRTAFPSLRLLHAVRGYWLTTNNVHIKRPTTGLLMYT----MATRFCEE |
| Plaste_2    | VDVRTAFPSLRLLHAVRGYWLTTNNVHIK-PTTGLLMYT----MATRFCEE |
| Clabat_4    | LPVRMAYPSLRLLHAVRGYWLTNKVNIKRPTTGLLMYT----MATRFCDE  |
| Ictpun_4A   | LPVHMAYPSLRLLHAVRGYWLTNKVNIKRPTTGLLMYT----MATRFCDE  |
| Panhyp_4    | LPVRMAYPSLRLLHAVRGYWLTNKVNIKRPTTGLLMYT----MATRFCDE  |
| Umbpyg_4    | LSVRTAYPSLRLLHAVRGYWLTNKINIKRPTTGLLMYT----LATRFCDE  |
| Esoluc_4    | LRVRTAYPSLRLLHAVRGYWLTNKINIKRPTTGLLMYT----LATRFCDE  |

|              |                                                    |
|--------------|----------------------------------------------------|
| Plealt_4     | LRVKTAYPSRLVHAVRGYWLTKINIKRPSTGLLMYT----LATRFCNE   |
| Onckis_4B    | LRVRTAYPSRLIHVVRGYWLTKINIKRPSTGLLMYT----LATRFCDE   |
| Onckis_4A    | LRVRTAYPSRLIHVVRGYWLTKINIKRPSTGLLMYT----LATRFCDE   |
| Onctsh_4     | LRVRTAYPSRLIHVVRGYWLTKINIKRPSTGLLMYT----LATRFCDE   |
| Oncmky_4     | LRVRTAYPSRLIHVVRGYWLTKINIKRPSTGLLMYT----LATRFCDE   |
| Corlav_4     | LRVRTAYPSRLIHAVRGYWLTKINIKRPSTGLLMYT----LATRFCDE   |
| Astmex_4A    | LPLRTAYPSRLIHAVRGYWLTKVNIKRPTGLLMYT----MATRFCDE    |
| Pygnat_4     | LPVHMAYPSRLIHAVRGYWLTKVNIKRPTGLLMYT----MATRFCDE    |
| Aloalo_4     | LRVRTAYPSRLIHAVRGYWLTKNIH IKRPSTGLLMYT----LATRFCDE |
| Cluhar_4     | LSVKPAYPSRLIHAVRGYWLTKNIH IKRPSTGLLMYT----LATRFCDE |
| Denclu_4     | LHLRMAYPSRLFHAVRGYWLTKVNIKRPTGLLMYT----LATRFCDE    |
| Konpun4      | LRVRTAYPSRLIHAVRGYWLTKNIH IKRPSTGLLMYT----LATRFCDE |
| Sarpil_4     | LRVRTAYPSRLIHAVRGYWLTKNIH IKRPSTGLLMYT----LATRFCDE |
| Caraur_4     | LKVRTAYPSRLIHAVRGYWLTKINIKRPSTGLLMYT----MATRFCDE   |
| Cteide_4     | LKVRMAYPSRLIHAVRGYWLTKINIKRPSTGLLMYT----MATRFCDE   |
| Petmar_4     | LPLRAAFPSRLMHAVRGYWLTKVYIKRPSTGLLMYT----LATRFCRE   |
| Cypcar_4     | LRLRTAYPSRLIHAVRGFWLTKINIKRPSTGLLMYT----LATRFCDE   |
| Danrer_4     | LKVRTAYPSRLIHAVRGFWLTKINIKRPSTGLLMYT----MATRFCDE   |
| Misang_4     | LKVRTAYPSRLIHAVRGYWLTKIKIKRPSTGLLMYT----MATRFCDE   |
| Angjap_4     | LRVRTAYPSRLIHAVRGYWLTKVNIKRPTGLLMYT----LATRFCDE    |
| Cypcar_4A    | LRLRTAYPSRLIHAVRGFWLTKINIKRPSTGLLMYT----LATRFCDE   |
| Angang_4     | LRVRPPTPRSGLIHAVRGYWLTKVNIKRPTGLLMYT----LATRFCDE   |
| Cypcar_4B    | LKVRTAYPSRLIHAVRGYWLTKINIKRPSTGLLMYT----LATRFCDE   |
| Sinans_4A    | LKVRTAYPSRLIHAVRGYWLTKINIKRPSTGLLMYT----MATRFCDE   |
| Sinans_4B    | LKVRTAYPSRLIHAVRGYWLTKINIKRPSTGLLMYT----MATRFCDE   |
| Singra_4A    | LKVRTAYPSRLIHAVRGYWLTKINIKRPSTGLLMYT----MATRFCDE   |
| Aptalb_4     | LPVRMAYPSRLVHAVRGYWLTKVNIKRPTGLLMYT----MATRFCDE    |
| Eigvir_4     | LPVHMAYPSRLIHAVRGYWLTKVNIKRPTGLLMYT----LATRFCDE    |
| Eleele_4     | LPVRMAYPSRLIHAVRGYWLTKVNIKRPTGLLMYT----MATRFCDE    |
| Parhas_4     | LPVRMAYPSRLVHAVRGYWLTKVNIKRPTGLLMYT----MATRFCDE    |
| Scifor_4     | LKLRTAYPSRLIHAVRGYWLTKINIKRPSTGLLMYT----LATRFCDE   |
| Gnapet4      | LLLRTAYPSRLIHAVRGYWLTKVNIKRPTGLLMYT----LATRFCNE    |
| Ostbic_4     | LRVRTAYPSRLNHAVRGYWLTKIKIKRPSTGLLMYT----LATRFCDE   |
| Parkin_4     | LLLRTAYPSRLIHAVRGYWLTKVNIKRPTGLLMYT----LATRFCNE    |
| Panbuc_4     | LKVRTAYPSRLIHAVRGYWLTKVNIKRPTGLLMYT----LATRFCDE    |
| Erpcal4      | LKVRTAYPSRLIHAVRGYWLTKINIKRPSTGLLMYT----LATRFCDE   |
| Salsal_4     | LRVRTAYPSRLIHVVRGYWLTKINIKRPSTGLLMYT----LATRFCDE   |
| Saltru_4     | LRVRTAYPSRLIHVVRGYWLTKINIKRPSTGLLMYT----LATRFCDE   |
| Salalp_4     | LRVRTAYPSRLIHVVRGYWLTKINIKRPSTGLLMYT----LATRFCDE   |
| Salfon_4     | LRVRTAYPSRLIHVVRGYWLTKINIKRPSTGLLMYT----LATRFCDE   |
| Thythy_4     | LSVRTAYPSRLIHAVRGYWLTKINIKRPSTGLLMYT----LATRFCDE   |
| Calmil_4     | LSIQTAYPSRLIHAVRGYWLTKVYIKRPSTGLLMYT----LATRFCDE   |
| Hetzeb_4     | LSIQTAYPSRLIHAVRGYWLTKIYIKRPSTGLLMYT----LATRFCDE   |
| Rhityp_4     | LNIQTAYPSRLIHAVRGYWLTKIYIKRPSTGLLMYT----LATRFCDE   |
| Scytor_4     | LNIQTAYPSRLIHAVRGYWLTKIYIKRPSTGLLMYT----LSTRFCDE   |
| Squaca_4     | LSIQTAYPSRLIHAVRGYWLTKVYIKRPSTGLLMYT----LATRFCDE   |
| Amical_4     | LKVRTAYPSRLIHAVRGYWLTKINIKRPSTGLLMYT----LATRFCDE   |
| Lepocu_4     | LKVRTAYPSRLIHAVRGYWLTKINIKRPSTGLLMYT----LATRFCDE   |
| Agema_4      | LPVRMAYPSRLVHAVRGYWLTKVNIKRPTGLLMYT----MATRFCDE    |
| Anocar_4     | LKVRTAYPSRLIHAVRGYWLTKVFIKRPTGLLMYT----LATRFCDE    |
| Canlupfam_4  | LKVRTAYPSRLIHAVRGYWLTKVPIKRPTGLLMYT----LATRFCDE    |
| Crigri_4     | LKVRTAYPSRLIHAVRGYWLTKVPIKRPTGLLMYT----LATRFCDE    |
| Galgal_4     | LKVRTAYPSRLIHAVRGYWLTKVHIKRPTGLLMYT----LATRFCDE    |
| Mesaur_4     | LKVRTAYPSRLIHAVRGYWLTKVPIKRPTGLLMYT----LATRFCDE    |
| Homsap_4     | LKVRTAYPSRLIHAVRGYWLTKVPIKRPTGLLMYT----LATRFCDE    |
| Notscuscu_4  | LKVQTAYPSRLIHAVRGYWLTKVYIKRPSTGLLMYT----LATRFCDE   |
| Psetextex_4  | LKVRTAYPSRLIHAVRGYWLTKVYIKRPSTGLLMYT----LATRFCDE   |
| Musmus_4     | LQVRTAYPSRLIHAVRGYWLTKVPIKRPTGLLMYT----LATRFCDE    |
| Pogvit_4     | LKVRTAYPSRLIHAVRGYWLTKVFIKRPTGLLMYT----LATRFCDE    |
| Promuc_4     | LKVRTAYPSRLIHAVRGYWLTKVYIKRPSTGLLMYT----LATRFCDE   |
| Pantro_4     | LKVRTAYPSRLIHAVRGYWLTKVPIKRPTGLLMYT----LATRFCDE    |
| Pytbiv_4     | LKVRTAYPSRLIHAVRGYWLTKVYIKRPSTGLLMYT----LATRFCDE   |
| Ratnor_2     | VNVRTAYPSRLHLHAVRGYWLTKVHIKRPTTGILLMYT----LATRFCNQ |
| Ratnor_4     | LKVRTAYPSRLIHAVRGYWLTKVPIKRPTITGILLMYT----LATRFCDE |
| Siltro_2     | INVHTAYPSRLHLHAVRGYWLTKVHIKRPTTGILLMYT----LATRFCNR |
| Siltro_4     | LKVRTAYPSRLIHAVRGYWLTKVQIKRPSTGLLMYT----LATRFCDE   |
| Susscr_4     | LKVRTAYPSRLIHAVRGYWLTKVPIKRPTGLLMYT----LATRFCDE    |
| Taegut_4     | LKVRTAYPSRLIHAVRGYWLTKVHIKRPTGLLMYT----LATRFCDE    |
| Termextri_4M | LKVRTAYPSRLIHAVRGYWLTKVHIKRPTGLLMYT----LTTRFCDE    |
| Thasirsir_4  | LKVRTAYPSRLIHAVRGYWLTKVYIKRPSTGLLMYT----LATRFCDE   |
| Xenlae_4B    | LKVRTAYPSRLIHAVRGYWLTKVQIKRPSTGLLMYT----LATRFCDE   |
| Xenlae_4A    | LKVRTAYPSRLIHAVRGYWLTKVQIKRPSTGLLMYT----LATRFCDE   |
|              | 201                                                |
| Latcal_3     | IHLYG----FWPFGWDPNTG---KELPYHYD KKGTKFTTKWQESHQLPA |
| Perflu_3     | IHLYG----FWPFGWDPNTG---KELPYHYD KKGTKFTTKWQESHQLPA |
| Serdum_3     | IHLYG----FWPFGWDPNTG---KELPYHYD KKGTKFTTKWQESHQLPA |
| Stepar_3     | IHLYG----FWPFGWDPNTG---KELPYHYD KKGTKFTTKWQESHQLPA |



|             |                                                      |
|-------------|------------------------------------------------------|
| Tetcal_3    | IHLYG----FWPFAWDPNTG---KELPYHYDYDKKGTKFTTKWQESHQLPA  |
| Monalb_3    | IHLYG----FWPFGWDPNTG---KELPYHYDYDKKGTKFTTKWQESHQLPA  |
| Molmol_3    | IHLYG----FWPFGWDPNTG---KELPYHYDYDKKGTKFTTKWQESHQLPA  |
| Takrub_3    | IHLYG----FWPFGWDPNTG---KELPYHYDYDKKGTKFTTKWQESHQLPT  |
| Canlupfam_3 | IHLYG----FWPFGFDPNTR---EDLPYHYDYDKKGTKFTTKWQESHQLPA  |
| Bostau_3    | IHLYG----FWPFGFDPNTR---EDLPYHYDYDKKGTKFTTKWQESHQLPA  |
| Homsap_3    | IHLYG----FWPFGFDPNTR---EDLPYHYDYDKKGTKFTTKWQESHQLPA  |
| Siltro_3    | IHLYG----FWPFGWDPNTG---KDLPHYHYDYDKKGTKFTTKWQESHQLPA |
| Anocar_3    | IHLYG----FWPFGFNPNNR---EDLPYHYDYDKKGTKFTTKWQESHQLPA  |
| Musmus_3    | IHLYG----FWPFGFDPNTR---EDLPYHYDYDKKGTKFTTKWQESHQLPA  |
| Pantro_3    | IHLYG----FWPFGFDPNTR---EDLPYHYDYDKKGTKFTTKWQESHQLPA  |
| Ratnor_3    | IHLYG----FWPFGFDPNTR---EDLPYHYDYDKKGTKFTTKWQESHQLPA  |
| Galgal_3    | IHLYG----FWPFGFDPNTR---EDLPYHYDYDKKGTKFTTKWQESHQLPA  |
| Lepocu_3    | IHLYG----FWPFGWDPNTG---KELPYHYDYDKKGTKFTTKWQESHQLPT  |
| Tetnig_3    | IHLYG----FWPFGWDPNTG---RELPHYHYDYDKKGTKFTTKWQESHQLPT |
| Squaca_3    | IHLYG----FWPFAWDPNTG---KELPYHYDYDKKGTKFTTKWQESHQLPA  |
| Perfla_3    | IHLYG----FWPFGWDPNTG---KELPYHYDYDKKGTKFTTKWQESHQLPA  |
| Salsal_3    | IHLYG----FWPFGWDPNTG---KELPYHYDYDKKGTKFTTKWQESHQLPA  |
| Serlaldor_3 | IHLYG----FWPFGWDPNTG---KELPYHYDYDKKGTKFTTKWQESHQLPA  |
| Treber_3    | IHLYG----FWPFGWDPNTG---NDLPYHYDYDKKGTKFTTKWQETHQLPT  |
| Cynsem_3    | IHLYG----FWPFGWDPNTG---KELPYHYDYDKKGTKFTTKWQESHQLPA  |
| Paroli_3    | IHLYG----FWPFGWDPNTG---KDLPHYHYDYDKKGTKFTTKWQETHQLPS |
| Paroli_3b   | IHLYG----FWPFGWDPNTG---KELPYHYDYDKKGTKFTTKWQESHQLPA  |
| Plaste_3    | IHLYG----FWPFGWDPNTG---NDLPYHYDYDKKGTKFTTKWQETHQLPS  |
| Plaste_3b   | IHLYG----FWPFGWDPNTG---KELPYHYDYDKKGTKFTTKWQESHQLPA  |
| Erpcal3     | IHLYG----FWPFGWDPNTG---KELPYHYDYDKKGTKFTTKWQESHQLPT  |
| Calmil_3b   | IHLYG----FWPFAWDPNTG---RELPHYHYDYDKKGTKFTTKWQETHQLPA |
| Hetzeb_3    | IHLYG----FWPFAWDPNTG---KELPYHYDYDKKGTKFTTKWQESHQLPA  |
| Latcha_3    | IHLYG----FWPFGWDPNSG---KDLPHYHYDYDKKGTKFTTKWQESHQLPA |
| Anates_3    | IHLYG----FWPFGWDPNTG---KELPYHYDYDKKGTKFTTKWQESHQLPA  |
| Ampcit3     | IHLYG----FWPFGWDPNTG---KELPYHYDYDKKGTKFTTKWQESHQLPA  |
| Auslim_3    | VHLYG----FWPFGWDPNTG---KELPYHYDYDKKGTKFTTKWQESHQLPA  |
| Cypvar_3    | IHLYG----FWPFGWDPNTG---KELPYHYDYDKKGTKFTTKWQESHQLPA  |
| Krymar_3    | VHLYG----FWPFGWDPNTG---KELPYHYDYDKKGTKFTTKWQESHQLPA  |
| Funhet_3    | IHLYG----FWPFGWDPNTG---KELPYHYDYDKKGTKFTTKWQESHQLPA  |
| Gamaff3     | IHLYG----FWPFGWDPNTG---KELPYHYDYDKKGTKFTTKWQESHQLPA  |
| Orylat_3    | IHLYG----FWPFGWDPNTG---KELPYHYDYDKKGTKFTTKWQESHQLPA  |
| Orenil_3    | IHLYG----FWPFGWDPNTG---KELPYHYDYDKKGTKFTTKWQESHQLPA  |
| Mayzeb_3    | IHLYG----FWPFGWDPNTG---KELPYHYDYDKKGTKFTTKWQESHQLPA  |
| Punnye_3    | IHLYG----FWPFGWDPNTG---KELPYHYDYDKKGTKFTTKWQESHQLPA  |
| Punnye_3a   | IHLYG----FWPFGWDPNTG---KELPYHYDYDKKGTKFTTKWQESHQLPA  |
| Neobri_3    | IHLYG----FWPFGWDPNTG---KELPYHYDYDKKGTKFTTKWQESHQLPA  |
| Misang_3    | VHLYG----FWPFGWDPNTG---KELPYHYDYDKKGTKFTTKWQESHQLPT  |
| Sinrhi3     | VHLYG----FWPFGWDPNTG---KELPYHYDYDKKGTKFTTKWQESHQLPT  |
| Singra_3    | VHLYG----FWPFGWDPNTG---KELPYHYDYDKKGTKFTTKWQESHQLPT  |
| Hapbur_3    | IHLYG----FWPFGWDPNTG---KELPYHYDYDKKGTKFTTKWQESHQLPA  |
| Astcal_3    | IHLYG----FWPFGWDPNTG---KELPYHYDYDKKGTKFTTKWQESHQLPA  |
| Notfur_3    | IHLYG----FWPFGWDPNTG---KELPYHYDYDKKGTKFTTKWQESHQLPA  |
| Cypcar_3    | -----                                                |
| Poefor3     | IHLYG----FWPFGWDPNTG---KELPYHYDYDKKGTKFTTKWQESHQLPA  |
| Poelat_3    | IHLYG----FWPFGWDPNTG---KELPYHYDYDKKGTKFTTKWQESHQLPA  |
| Poeret_3    | VHLYG----FWPFGWDPNTG---KELPYHYDYDKKGTKFTTKWQESHQLPA  |
| Angang_3    | IHLYG----FWPFGWDPNTG---KELPYHYDYDKKGTKFTTKWQESHQLPS  |
| Xipmac_3    | IHLYG----FWPFGWDPNTG---KELPYHYDYDKKGTKFTTKWQESHQLPA  |
| Masarm_3    | IHLYG----FWPFGWDPNTG---KELPYHYDYDKKGTKFTTKWQESHQLPA  |
| Permag_3    | -----LPYHYDYDKKGTKFTTKWQESHQLPA                      |
| Gnapet3     | VHLYG----FWPFGWDPSTG---RELPHYHYDYDKKGTKFTTKWQESHQLPA |
| Ostbic_3    | VHLYG----FWPFGWDPNTG---KELPYHYDYDKKGTKFTTKWQETHQLPT  |
| Gadmor_3    | IHLYG----FWPFGWDPNTG---KELPYHYDYDKKGTKFTTKWQESHQLPA  |
| Scifor_3    | VHLYG----FWPFGWDPNTG---KELPYHYDYDKKGTKFTTKWQESHQLPS  |
| Acapol3     | IHLYG----FWPFGWDPNTG---KELPYHYDYDKKGTKFTTKWQESHQLPA  |
| Ampoce_3    | IHLYG----FWPFGWDPNTG---KELPYHYDYDKKGTKFTTKWQESHQLPA  |
| Scifor_3b   | IHLYG----FWPFAWDPISG---KGLPHYHYDYDKKGTKFTTKWQESHQLPA |
| Ostbic_3b   | IHLYG----FWPFGWDPISG---KGLPHYHYDYDKKGTKFTTKWQESHQLPA |
| Parkin_3    | VHLYG----FWPFGWDPSTG---RELPHYHYDYDKKGTKFTTKWQESHQLPA |
| Amppe3      | IHLYG----FWPFGWDPNTG---KELPYHYDYDKKGTKFTTKWQESHQLPA  |
| Oncmyk_3    | IHLYG----FWPFGWDPNTG---KELPYHYDYDKKGTKFTTKWQESHQLPA  |
| Gasacu_3    | IHLYG----FWPFGWDPNTG---KELPYHYDYDKKGTKFTTKWQESHQLPA  |
| Labber_3    | IHLYG----FWPFGWDPNTG---KELPYHYDYDKKGTKFTTKWQESHQLPA  |
| Panbuc_3    | VHLYG----FWPFGWDPASG---RELPHYHYDYDKKGTKFTTKWQESHQLPA |
| Parhas3     | VHLYG----FWPFGWDPNTG---KDLPHYHYDYDKKGTKFTTKWQESHQLPT |
| Cluhar_3    | IHLYG----FWPFGWDPNTG---KELPYHYDYDKKGTKFTTKWQESHQLPT  |
| Aloalo_3    | IHLYG----FWPFGWDPNTG---KELPYHYDYDKKGTKFTTKWQESHQLPT  |
| Panhyp_3    | VHLYG----FWPFGWDPNTG---KELPYHYDYDKKGTKFTTKWQESHQLPT  |
| Eleele_3    | VHLYG----FWPFGWDPNTG---KELPYHYDYDKKGTKFTTKWQESHQLPT  |
| Denclu_3    | IHLYG----FWPFGWDPNTG---KELPYHYDYDKKGTKFTTKWQESHQLPT  |
| Sarpil_3    | IHLYG----FWPFGWDPNTG---KELPYHYDYDKKGTKFTTKWQESHQLPT  |

|             |           |                |          |           |      |        |      |    |   |
|-------------|-----------|----------------|----------|-----------|------|--------|------|----|---|
| Eigvir_3    | VHLYG---- | FWPFGWDPNTG--- | KELPYHYD | KKGT      | KFTT | KKWQ   | ESHQ | LP | T |
| Aptalb_3    | VHLYG---- | FWPFGWDPNTG--- | KDLPYHYD | KKGT      | KFTT | KKWQ   | ESHQ | LP | T |
| Sinans_3    | VHLYG---- | FWPFGWDPNTG--- | KELPYHYD | KKGT      | KFTT | KKWQ   | ESHQ | LP | T |
| Pygnat_3    | IHLYG---- | FWPFGWDPNTG--- | KELPYHYD | KKGT      | KFTT | KKWQ   | ESHQ | LP | T |
| Astmex_3    | IHLYG---- | FWPFGWDPNTG--- | KELPYHYD | KKGT      | KFTT | KKWQ   | ESHQ | LP | T |
| Caraur_3    | VHLYG---- | FWPFGWDPNTG--- | KELPYHYD | KKGT      | KFTT | KKWQ   | ESHQ | LP | T |
| Danrer_3    | VHLYG---- | FWPFGWDPNTG--- | KELPYHYD | KKGT      | KFTT | KKWQ   | ESHQ | LP | T |
| Ictpun_3    | IHLYG---- | FWPFGWDPNTG--- | KELPYHYD | KKGT      | KFTT | KKWQ   | ESHQ | LP | T |
| Plealt_3    | IHLYG---- | FWPFGWDPNTG--- | KELPYHYD | KKGT      | KFTT | KKWQ   | ESHQ | LP | A |
| Plealt_9    | IHLYG---- | FWPFGWDPNTG--- | KELPYHYD | KKGT      | KFTT | KKWQ   | ETHQ | LP | S |
| Gasacu_9    | IHLYG---- | FWPFGWDPNTG--- | NDLPYHYD | KKGT      | KFTT | KKWQ   | ETHQ | LP | S |
| Parkin_9    | VHLYG---- | FWPFGWDPISG--- | KGLPYHYD | KKGT      | KFTT | KKWQ   | ESHQ | LP | A |
| Acapol_9    | IHLYG---- | FWPFGWDPNTG--- | KELPYHYD | KKGT      | KFTT | KKWQ   | ETHQ | LP | S |
| Larcro_9    | IHLYG---- | FWPFGWDPNTG--- | KDLPYHYD | KKGT      | KFTT | KKWQ   | ETHQ | LP | S |
| Notcro_9    | IHLYG---- | FWPFGWDPNTG--- | NDLPYHYD | KKGT      | KFTT | KKWQ   | ETHQ | LP | S |
| Latcal_9    | IHLYG---- | FWPFGWDPNTG--- | KELPYHYD | KKGT      | KFTT | KKWQ   | ETHQ | LP | S |
| Serlaldor_9 | IHLYG---- | FWPFGWDPNTG--- | KELPYHYD | KKGT      | KFTT | KKWQ   | ETHQ | LP | S |
| Monalb_9    | VHLYG---- | FWPFGWDPNTG--- | KELPYHYD | KKGT      | KFTT | KKWQ   | EAHQ | LP | S |
| Serdum_9    | IHLYG---- | FWPFGWDPNTG--- | KELPYHYD | KKGT      | KFTT | KKWQ   | ETHQ | LP | S |
| Perflu_9    | IHLYG---- | FWPFGWDPNSG--- | KDLPYHYD | KKGT      | KFTT | KKWQ   | ETHQ | LP | S |
| Perfla_9    | IHLYG---- | FWPFGWDPNSG--- | KDLPYHYD | KKGT      | KFTT | KKWQ   | ETHQ | LP | S |
| Stepar_9    | IHLYG---- | FWPFGWDPNTG--- | KELPYHYD | KKGT      | KFTT | KKWQ   | ETHQ | LP | S |
| Molmol_9    | IHLYG---- | FWPFGWDPNTG--- | NDLPYHYD | KKGT      | KFTT | KKWQ   | ETHQ | LP | S |
| Hipcom_9    | IHLYG---- | FWPFGWDPNTG--- | KDLPYHYD | KKGT      | KFTT | KKWQ   | ETHQ | LP | S |
| Takrub_9 B  | IHLYG---- | FWPFGWDPNTG--- | KELPYHYD | KKGT      | KFTT | KKWQ   | ETHQ | LP | T |
| Takrub_9    | IHLYG---- | FWPFGWDPNTG--- | KELPYHYD | KKGT      | KFTT | KKWQ   | ETHQ | LP | T |
| Cynsem_9    | IHLYG---- | FWPFGWDPNTG--- | KDLPYHYD | KKGT      | KFTT | KKWQ   | ETHQ | LP | S |
| Scomax_9    | IHLYG---- | FWPFGWDPNTG--- | KDLPYHYD | KKGT      | KFTT | KKWQ   | ETHQ | LP | S |
| Corlav_9    | IHLYG---- | FWPFGWDPNTG--- | KELPYHYD | KKGT      | KFTT | KKWQ   | ETHQ | LP | S |
| Oncmyk_9    | IHLYG---- | FWPFGWDPNTG--- | KELPYHYD | KKGT      | KFTT | KKWQ   | ETHQ | LP | S |
| Salsal_9    | IHLYG---- | FWPFGWDPNTG--- | KELPYHYD | KKGT      | KFTT | KKWQ   | ESHQ | LP | A |
| Onctsh_9    | IHLYG---- | FWPFGWDPNTG--- | KELPYHYD | KKGT      | KFTT | KKWQ   | ETHQ | LP | S |
| Salalp_9    | IHLYG---- | FWPFGWDPNTG--- | KELPYHYD | KKGT      | KFTT | KKWQ   | ETHQ | LP | S |
| Ampoce_9    | IHLYG---- | FWPFGWDPNTG--- | KELPYHYD | KKGT      | KFTT | KKWQ   | ETHQ | LP | S |
| Amppe9      | IHLYG---- | FWPFGWDPNTG--- | KELPYHYD | KKGT      | KFTT | KKWQ   | ETHQ | LP | S |
| Labber_9    | IHLYG---- | FWPFGWDPNTG--- | KDLPYHYD | KKGT      | KFTT | KKWQ   | ETHQ | LP | T |
| Umbpyg_3B   | IHLYG---- | FWPFGWDPNTG--- | KELPYHYD | KKGT      | KFTT | KKWQ   | ESHQ | LP | A |
| Esoluc_3b   | IHLYG---- | FWPFGWDPNTG--- | KELPYHYD | DRKGT     | KFTT | KKWQ   | ESHQ | LP | A |
| Gadmor_9    | IHLYG---- | FWPFGWDPNTG--- | KDLPYHYD | KKGT      | KFTT | KKWQ   | ETHQ | LP | S |
| Umbpyg_9    | IHLYG---- | FWPFGWDPNTG--- | KELPYHYD | KKGT      | KFTT | KKWQ   | ETHQ | LP | S |
| Esoluc_9    | IHLYG---- | FWPFGWDPNTG--- | KELPYHYD | KKGT      | KFTT | KKWQ   | ETHQ | LP | S |
| Permag_9    | IHLYG---- | FWPFGWDPNTG--- | KDLPYHYD | DRKGT     | KFTT | KKWQ   | ETHQ | LP | N |
| Bolpec_9    | IHLYG---- | FWPFGWDPNTG--- | KDLPYHYD | DRKGT     | KFTT | KKWQ   | ETHQ | LP | N |
| Poefor9     | IHLYG---- | FWPFGWDPNTG--- | KELPYHYD | KKGT      | KFTT | KKWQ   | ETHQ | LP | S |
| Masarm_9    | IHLYG---- | FWPFGWDPNTG--- | KELPYHYD | KKGT      | KFTT | KKWQ   | ETHQ | LP | S |
| Angjap_9    | IHLYG---- | FWPFGWDPNTG--- | KELPYHYD | KKGT      | KFTT | KKWQ   | ESHQ | LP | S |
| Poelat_9    | IHLYG---- | FWPFGWDPNTG--- | KELPYHYD | KKGT      | KFTT | KKWQ   | ETHQ | LP | S |
| Poeret_9    | IHLYG---- | FWPFGWDPNTG--- | KELPYHYD | KKGT      | KFTT | KKWQ   | ETHQ | LP | S |
| Xipmac_9    | IHLYG---- | FWPFGWDPNTG--- | KDLPYHYD | KKGT      | KFTT | KKWQ   | ETHQ | LP | S |
| Hapbur_9    | IHLYG---- | FWPFGWDPNTG--- | KDLPYHYD | KKGT      | KFTT | KKWQ   | ETHQ | LP | S |
| Orylat_9    | IHLYG---- | FWPFGWDPNTG--- | KDLPYHYD | KKGT      | KFTT | KKWQ   | ETHQ | LP | S |
| Gamaff_9    | IHLYG---- | FWPFGWDPNTG--- | KDLPYHYD | KKGT      | KFTT | KKWQ   | ETHQ | LP | S |
| Neobri_9    | IHLYG---- | FWPFGWDPNTG--- | KDLPYHYD | KKGT      | KFTT | KKWQ   | ETHQ | LP | S |
| Funhet_9    | IHLYG---- | FWPFGWDPNTG--- | KELPYHYD | KKGT      | KFTT | KKWQ   | ETHQ | LP | S |
| Punnye_9    | IHLYG---- | FWPFGWDPNTG--- | KDLPYHYD | KKGT      | KFTT | KKWQ   | ETHQ | LP | S |
| Cypvar_9    | IHLYG---- | FWPFGWDPNTG--- | KELPYHYD | KKGT      | KFTT | KKWQ   | ETHQ | LP | S |
| Krymar_9    | IHLYG---- | FWPFGWDPNTG--- | KELPYHYD | KKGT      | KFTT | KKWQ   | ETHQ | LP | S |
| Notfur_9    | IHLYG---- | FWPFGWDPNTG--- | KELPYHYD | KKGT      | KFTT | KKWQ   | ETHQ | LP | S |
| Notpie_9    | IHLYG---- | FWPFGWDPNTG--- | KELPYHYD | KKGT      | KFTT | KKWQ   | ETHQ | LP | S |
| Orenil_9    | IHLYG---- | FWPFGWDPNTG--- | KDLPYHYD | KKGT      | KFTT | KKWQ   | ETHQ | LP | S |
| Auslim_9    | IHLYG---- | FWPFGWDPNTG--- | KELPYHYD | KKGT      | KFTT | KKWQ   | ETHQ | LP | S |
| Anates_9    | IHLYG---- | FWPFGWDPNTG--- | KDLPYHYD | KKGT      | KFTT | KKWQ   | ETHQ | LP | S |
| Astcal_9    | IHLYG---- | FWPFGWDPNTG--- | KDLPYHYD | KKGT      | KFTT | KKWQ   | ETHQ | LP | S |
| Mayzeb_9    | IHLYG---- | FWPFGWDPNTG--- | KDLPYHYD | KKGT      | KFTT | KKWQ   | ETHQ | LP | S |
| Orymel_9    | IHLYG---- | FWPFGWDPNTG--- | KELPYHYD | KKGT      | KFTT | KKWQ   | ETHQ | LP | S |
| Ampcit9     | IHLYG---- | FWPFGWDPNTG--- | KDLPYHYD | KKGT      | KFTT | KKWQ   | ETHQ | LP | S |
| Macfas_2    | IYLYG---- | FWPFPLDQN-Q--- | NPVKYHYD | SLKYGYTS  | QASP | -HTMPL |      |    |   |
| Macmul_2    | IYLYG---- | FWPFPLDQN-Q--- | NPVKYHYD | SLKYGYTS  | QASP | -HTMPL |      |    |   |
| Macnem_2    | IYLYG---- | FWPFPLDQN-Q--- | NPVKYHYD | SLKYGYTS  | QASP | -HTMPL |      |    |   |
| Musmus_2    | IYLYG---- | FWPFPLDQN-Q--- | NPVKYHYD | SLKYGYTS  | QASP | -HTMPL |      |    |   |
| Ponabe_2    | IYLYG---- | FWPFPLDQN-Q--- | NPVKYHYD | SLKYGYTS  | QASP | -HTMPL |      |    |   |
| Papanu_2    | IYLYG---- | FWPFPLDQN-Q--- | NPVKYHYD | SLKYGYTS  | QASP | -HTMPL |      |    |   |
| Nomleu_2    | IYLYG---- | FWPFPLDQN-Q--- | NPVKYHYD | SLKYGYTS  | QASP | -HTMPL |      |    |   |
| Pantro_2    | IYLYG---- | FWPFPLDQN-Q--- | NPVKYHYD | SLKYGYTS  | QASP | -HTMPL |      |    |   |
| Latcha_2    | IHLYG---- | FWPFPRDHS-E--- | RPVKYHYD | SLTYEYTS  | QASP | -HTMPL |      |    |   |
| Gnapet2     | IHLYG---- | FWPFALGPQ-G--- | NPVKYHYD | SLTYQYTS  | QASP | -HTMPL |      |    |   |
| Panbuc_2b   | IHLYG---- | FWPFPRDVG-G--- | RPVKYHYD | DALTYGYTS | QAGP | -HAMPL |      |    |   |

|             |                                                     |
|-------------|-----------------------------------------------------|
| Ostbic_2    | IHLYG----FWPFPLGPH-G---NPVKYHYDALTYYEYTSQVGP-HTMPL  |
| Sinrhi2     | IHLYG----FWPFAHDPD-G---KSVKYHYDTLTYHYTSGASP-HTMPL   |
| Hetzeb_2    | IHLYG----FWPFPKDQK-G---NVVKYHYDLSLTYEYNSRATP-HTMPL  |
| Hipcom_2    | IHLYG----FWPFSDAA-G---KAVKYHYDTLKYEYTSSSSP-HSMPL    |
| Prigla_2    | IHLYG----FWPFPKDQK-G---NVVKYHYDLSLTYEYNSRATP-HTMPL  |
| Scytor_2    | IHLYG----FWPFPKDQK-G---NAVKYHYDLSLTYEYNSRATP-HTMPL  |
| Tetcal_2    | IHLYG----FWPFKDPK-G---NAVKYHYDLSLTYEYNSRATP-HTMPL   |
| Rhityp_2    | IHLYG----FWPFKDHK-G---NAVKYHYDLSLTYEYNSRATP-HTMPL   |
| Parkin_2b   | IHLYG----FWPFSDAQ-G---NAVKYHYDLSLTYGYTSRTSP-HTMPL   |
| Angang_2    | IHLYG----FWPFQDPQ-G---NPMKYHYDLSLTYEYDSSHSP-HTMPL   |
| Pygnat_2    | IHLYG----FWPFPRDSE-G---KPVKYHYDLSLTYQYTSSSSP-HTMPL  |
| Parkin_2    | IHLYG----FWPFALGPQ-G---NPVKYHYDLSLTYEYTSQASP-HTMPL  |
| Gorgor_2    | IYLYG----FWPFPLDQN-Q---NPVKYHYDLSLKYGYTSQASP-HTMPL  |
| Thegel_2    | IYLYG----FWPFPLDQN-Q---NPVKYHYDLSLKYGYTSQASP-HTMPL  |
| Tupchi_2    | IYLYG----FWPFPLDQN-Q---NPVKYHYDLSLKYGYTSQASP-HTMPL  |
| Galgal_2    | IHLYG----FWPFPLDQN-Q---QPVKYHYDLSLKYGYTSQASP-HTMPL  |
| Eleele_2    | IHLYG----FWPFSHGPE-G---KPVKYHYDALTYYEYTSSSSP-HTMPL  |
| Danrer_2    | IHLYG----FWPFAHDPD-G---KPVKYHYDTLTYHYTSSASP-HTMPL   |
| Canlupfam_2 | IYLYG----FWPFPLDQN-Q---NPVKYHYDLSLKYGYTSQASP-HTMPL  |
| Aloalo_2    | IHLYG----FWPFHRDHQ-G---KRVKYHYDTLTYEFTSRASP-HTMPL   |
| Astmex_2    | IHLYG----FWPFPRDSE-G---KPVKYHYDLSLTYQYTSSSSP-HTMPL  |
| Sinans_2    | IHLYG----FWPFAHDPD-G---KPVKYHYDTLTYHYTSSASP-HTMPL   |
| Scfor_2     | IHLYG----FWPFLGPH-G---NPVKYHYDALTYYEYTSQVGP-HTMPL   |
| Ceraty_2    | IYLYG----FWPFPLDQN-Q---NPVKYHYDLSLKYGYTSQASP-HTMPL  |
| Anocar_2    | IYLYG----FWPFPRDQD-Q---NPVKYHYDLSLKYGYTSQASP-HTMPL  |
| Anates_2    | IHLYG----FWPFPLDPQ-G---KPVKYHYDALKYEYTSSSSP-HTMPL   |
| Ampbic_2    | IHLYG----FWPFPLDPH-G---KPVKYHYDLSLTYEYTSSSSP-HTMPL  |
| Sarpil_2    | IHLYG----FWPFHRDHQ-G---KRVKYHYDTLTYQFTSRASP-HTMPL   |
| Xenlae_2    | IYLYG----FWPFPRDLH-Q---NPVKYHYDLSLKYGYTSQAGP-HAMPL  |
| Cluhar_2    | IHLYG----FWPFHRDHQ-G---NVVKYHYDLSLTYEFTSRASP-HTMPL  |
| Cypcar_2    | IHLYG----FWPFAHDPD-G---KPVKYHYDLSLTYHYTSSASP-HTMPL  |
| Denclu_2    | IHLYG----FWPFHRDAQ-G---KPVKYHYDALTYYEYTSSSHSP-HTMPL |
| Notpie_2    | IHLYG----FWPFPLDPK-G---KTVKYHYDLSLTYEYTSSSSP-HTMPL  |
| Erpcal2     | IHLYG----FWPFQDQK-G---NSVKYHYDLSLRYEFTSQSSP-HAMPL   |
| Amical_2    | IHLYG----FWPFSGPA-G---NPVKYHYDLSLTYEYTAQSSP-HTMPL   |
| Lepocu_2    | IHLYG----FWPFSLGPN-G---LPVKYHYDLSLTYEYRAQSSP-HSMPV  |
| Homsap_2    | IYLYG----FWPFPLDQN-Q---NPVKYHYDLSLKYGYTSQASP-HTMPL  |
| Bostau_2    | IYLYG----FWPFPLDQN-Q---NPVKYHYDLSLKYGYTSQASP-HTMPL  |
| Caraur_2    | IHLYG----FWPFAHDPD-G---KPVKYHYDLSLTYHYTSSASP-HTMPL  |
| Thythy_2B   | IHLYG----FWPFPKDSQ-G---KPVKYHYDLSLTYEYTSHASP-HTMPL  |
| Onctsh_2B   | IHLYG----FWPFQDSQ-G---KPVKYHYDLSLTYEYTSHASP-HTMPL   |
| Salsal_2B   | IHLYG----FWPFQDSQ-G---KSVKYHYDLSLTYEYTSHASP-HTMPL   |
| Oncmk_2B    | IHLYG----FWPFQDSQ-G---KPVKYHYDLSLTYEYTSHASP-HTMPL   |
| Onckis_2B   | IHLYG----FWPFQDSQ-G---KPVKYHYDLSLTYEYTSHASP-HTMPL   |
| Salsal_2A   | IHLYG----FWPFPRDSQ-G---KPVKYHYDLSLTYEYTSHASP-HAMPL  |
| Thythy_2A   | IHLYG----FWPFPRNSQ-G---KPVKYHYDLSLTYEYTSHASP-HTMPL  |
| Salalp_2A   | IHLYG----FWPFPRDSQ-G---KPVKYHYDLSLTYEYTSHASP-HTMPL  |
| Corlav_2A   | IHLYG----FWPFPRDSQ-G---IPVKYHYDLSLTYEYTSHASP-HTMPL  |
| Cormar_2A   | IHLYG----FWPFPRDSQ-G---IPVKYHYDLSLTYEYTSHASP-HTMPL  |
| Onctsh_2A   | IHLYG----FWPFPRDSQ-G---KPVKYHYDLSLTYEYTSHASP-HTMPL  |
| Oncmk_2A    | IHLYG----FWPFQDSQ-G---KPVKYHYDLSLTYEYTSHASP-HTMPL   |
| Neobri_2    | IHLYG----FWPFPLDPQ-G---KPVKYHYDLSLTYEYTSSSSP-HTMPL  |
| Takrub_2    | IHLYG----FWPFPSDPH-G---RPVKYHYDLSLTYEYTSSSSP-HTMPL  |
| Tetnig_2    | IHLYG----FWPFPLDPR-G---RPVKYHYDLSLTYEYTSSSSP-HTMPL  |
| Orenil_2    | IHLYG----FWPFPLDPQ-G---KPVKYHYDLSLTYEYTSSSSP-HTMPL  |
| Orylat_2    | IHLYG----FWPFVDSH-G---KAVKYHYDLSLTYEYTSSSSP-HTMPL   |
| Krymar_2    | IHLYG----FWPFALDPR-G---RPVKYHYDALKYEYTSSSSP-HAMPL   |
| Notfur_2    | IHLYG----FWPFPLDPK-G---KTVKYHYDLSLTYEYTSSSSP-HTMPL  |
| Poelat_2    | IHLYG----FWPFPLGPQ-G---RPVKYHYDLSLTYEYTSSSSP-HTMPL  |
| Gadmor_2    | IHLYG----FWPFPLDPR-G---RPVKYHYDLSLTYEYTSSSSP-HTMPL  |
| Xipmac_2    | IHLYG----FWPFPLGPQ-G---RPVKYHYDLSLTYEYTSSSSP-HTMPL  |
| Poeret_2    | IHLYG----FWPFPLGPQ-G---RPVKYHYDLSLTYEYTSSSSP-HTMPL  |
| Astcal_2    | IHLYG----FWPFSLDPQ-G---KPVKYHYDLSLTYEYTSSSSP-HTMPL  |
| Hapbur_2    | IHLYG----FWPFSLDPQ-G---KPVKYHYDLSLTYEYTSSSSP-HTMPL  |
| Acapol_2B   | IHLYG----FWPFPLDPH-G---KPVKYHYDLSLTYEYTSSSSP-HTMPL  |
| Ampoce_2A   | IHLYG----FWPFPLDPH-G---NPVKYHYDLSLTYEYTSSSSP-HTMPL  |
| Acapol_2A   | IHLYG----FWPFPLDPH-G---KPVKYHYDLSLTYEYTSSSSP-HTMPL  |
| Mayzeb_2    | IHLYG----FWPFSLDPQ-G---KPVKYHYDLSLTYEYTSSSSP-HTMPL  |
| Punnye_2    | IHLYG----FWPFSLDPQ-G---KPVKYHYDLSLTYEYTSSSSP-HTMPL  |
| Latcal_2    | IHLYG----FWPFPLDPQ-G---KPVKYHYDLSLTYEYTSSSSP-HTMPL  |
| Singra_2    | IHLYG----FWPFAHDPD-G---KPVKYHYDLSLTYHYTSSASP-HTMPL  |
| Auslim_2    | IHLYG----FWPFPLDPR-G---RPVKYHYDLSLTYEYTSSSSP-HTMPL  |
| Monalb2     | IHLYG----FWPFPLDLQ-G---KPVKYHYDLSLTYEYTSSSSP-HTMPL  |
| Ampoce_2B   | IHLYG----FWPFPLDPH-G---NPVKYHYDLSLTYEYTSSSSP-HTMPL  |
| Chiham_2    | IHLYG----FWPFSDHPQ-G---KPVKYHYDLSLTYEYTSSSSP-HTMPL  |
| Gasacu_2    | IHLYG----FWPFHRDPQ-G---RPVKYHYDALKYEYTSSSSP-HTMPL   |
| Gymacu_2    | IHLYG----FWPFSDHPQ-G---KPVKYHYDLSLTYEYTSSSSP-HTMPL  |

|             |                                                    |
|-------------|----------------------------------------------------|
| Labber_2    | IHLYG----FWPFPLDPQ-G---RPVKYHYDYLKYEYTSASAP-HTMPL  |
| Cypvar_2    | IHLYG----FWPFPLDPQ-G---RPVKYHYDYLKYEYTSSSSP-HTMPL  |
| Funhet_2    | IHLYG----FWPFPLGPH-G---RPVKYHYDYLKYQYTSSSSP-HTMPL  |
| Larcro_2    | IHLYG----FWPFPLDPQ-G---KPVKYHYDYLKYEYTSSSSP-HTMPL  |
| Paroli_2    | IHLYG----FWPFALDPQ-G---KPVKYHYDYLKYEYTSRSSP-HSMPL  |
| Perflu_2    | IHLYG----FWPFPLDPQ-G---RSVKYHYDYLKYEYTSSSSP-HTMPL  |
| Serdum_2    | IHLYG----FWPFALDPQ-G---KPVKYHYDYLKYEYTSSSSP-HTMPL  |
| Stepar_2    | IHLYG----FWPFPLDPQ-G---KPVKYHYDYLKYEYTSSSSP-HTMPL  |
| Notcor_2    | IHLYG----FWPFSHDPQ-G---KPVKYHYDYLKYEYTSSSSP-HTMPL  |
| Treber_2    | IHLYG----FWPFSHDPQ-G---KPVKYHYDYLKYEYTSSSSP-HTMPL  |
| Serlaldor_2 | IHLYG----FWPFALDPQ-G---KPVKYHYDYLKYEYTSSSSP-HTMPL  |
| Plaste_2    | IHLYG----FWPFALDPQ-G---KPVKYHYDYLKYEYTSRSSP-HTMPL  |
| Clabat_4    | IHLYG----FWPFPKDNS-G---NPVKYHYDMLKYRYFSNAGP-HRMPL  |
| Ictpun_4A   | IHLYG----FWPFPKDSS-G---NPVKYHYDMLKYRYFSNASP-HRMPL  |
| Panhyp_4    | IHLYG----FWPFPKDAS-G---NPVKYHYDMLKYRYFSNASP-HRMPL  |
| Umbpyg_4    | IHLYG----FWPFPRDAK-G---NAVKYHYDMLKYRYFSNAGP-HRMPL  |
| Esoluc_4    | IHLYG----FWPFPRDAN-G---NVVKYHYDMLKYSYFSNAGP-HRMPL  |
| Plealt_4    | IHLYG----FWPFPRDAN-G---NLVKYHYDMLKYRYFSNAGP-HRMPL  |
| Onckis_4B   | IHLYG----FWPFPRDAN-G---NMVKYHYDMLKYRYFSNASP-HRMPL  |
| Onckis_4A   | IHLYG----FWPFPRDAN-G---NMVKYHYDMLKYRYFSNASP-HRMPL  |
| Onctsh_4    | IHLYG----FWPFPRDAN-G---NMVKYHYDMLKYRYFSNASP-HRMPL  |
| Oncmyk_4    | IHLYG----FWPFPRDAN-G---NMVKYHYDMLKYRYFSNAGP-HRMPL  |
| Corlav_4    | IHLYG----FWPFPRDSN-G---NVVKYHYDMLKYRYFSNAGP-HRMPL  |
| Astmex_4A   | IHLYG----FWPFPKDAN-G---IPVKYHYDMLKYRYFSAGP-HRMPL   |
| Pygnat_4    | IHLYG----FWPFPKDAA-G---NPVKYHYDYLKYRYFSRAGP-HRMPL  |
| Aloalo_4    | IHLYG----FWPFPKDTH-G---NPVKYHYDYLKYRYFSNAGP-HRMPL  |
| Cluhar_4    | IHLYG----FWPFPKDSQ-G---NPVKYHYDYLKYRYFSNAGP-HRMPL  |
| Denclu_4    | IHLYG----FWPFPRDTQ-G---NPVKYHYDMLKYRYLSNAAP-HRMPL  |
| Konpun_4    | IHLYG----FWPFPKDSQ-G---NTVKYHYDYLKYRYFSNAGP-HRMPL  |
| Sarpil_4    | IHLYG----FWPFPKDTH-G---NPVKYHYDYLKYRYFSNAGP-HRMPL  |
| Caraur_4    | IHLYG----FWPFPRDGS-G---NPVKYHYDGLRYRYFSNAGP-HRMPL  |
| Cteide_4    | IYLYG----FWPFPKDAN-G---NPVKYHYDYLKYRYFSNVGP-HRMPL  |
| Petmar_4    | IHLYG----FWPFQYNIA-G---KPVRYHYEGLRYRYFSRAGP-HTMPL  |
| Cypcar_4    | IHLYG----FWPFPKDGN-G---NPVKYHYDGLKYRYFSNAGP-HRMPL  |
| Danrer_4    | IYLYG----FWPFPKDAS-G---NPVQYHYFDGLKYRYFSNAGP-HRMPL |
| Misang_4    | IHLYG----FWPFPKDGN-G---NPVNYHYDYLKYRYFSNAGP-HRMPL  |
| Angjap_4    | IHLYG-----                                         |
| Cypcar_4A   | IHLYG----FWPFPKDGN-G---NPVKYHYDGLKYRYFSNAGP-HRMPL  |
| Angang_4    | IHLYG----FWPFPKDLG-G---NPVKYHYDALKYRYFSKASP-HRMPL  |
| Cypcar_4B   | IHLYG----FWPFPKDGN-G---NPVKYHYDGLRYRYFSNASP-HRMPL  |
| Sinans_4A   | IHLYG----FWPFPKDGN-R---NTVKYHYDGLKYRYFSAGP-HRMPL   |
| Sinans_4B   | IYLYG----FWPFPKDGN-G---NPVKYHYDGLRYRYFSNAGP-HRMPL  |
| Singra_4A   | IHLYG----FWPFPKDGN-R---NPVKYHYDGLKYRYFSAGP-HRMPL   |
| Aptalb_4    | IHLYG----FWPFPKDAE-G---NPVKYHYDSLKYRYFSAGP-HRMPL   |
| Eigvir_4    | IHLYG----FWPFPKDAE-G---NPVKYHYDYLKYRYFSAGP-HRMPL   |
| Eleele_4    | IHLYG----FWPFPKDAK-G---NLVKYHYDYLKYRYFSNAGP-HRMPL  |
| Parhas_4    | IHLYG----FWPFPKDAE-G---NPVKYHYDSLKYRYFSAGP-HRMPL   |
| Sclfor_4    | IHLYG----FWPFPKDSK-G---NAVKYHYDALKYRYFSNASP-HKML   |
| Gnapet_4    | IHLYG----FWPFPKDSS-G---NPVKYHYDKLKYRYFSNAGP-HRMPL  |
| Ostbic_4    | IHLYG----FWPFPKDSK-G---NMVKYHYDYLKYRYSSKAGP-HRMPL  |
| Parkin_4    | IHLYG----FWPFPKDSS-G---NPVKYHYDKLKYRYFSNAGP-HRMPL  |
| Panbuc_4    | IHLYG----FWPFPKDLQ-G---NPVKYHYDRLKYRYFSKAGP-HRMPL  |
| Erpcal_4    | IHLYG----FWPFPKDSI-G---KPVKYHYDELKYRYFSNASP-HRMPL  |
| Salsal_4    | IHLYG----FWPFPRDAN-G---NMVKYHYDMLKYRYFSNAGP-HRMPL  |
| Saltru_4    | IHLYG----FWPFPRDAN-G---NMVKYHYDMLKYRYFSNAGP-HRMPL  |
| Salalp_4    | IHLYG----FWPFPRDAN-G---KIVKYHYDMLKYRYFSNAGP-HRMPL  |
| Salfon_4    | IHLYG----FWPFPRDAN-G---KIVKYHYDMLKYRYFSNAGP-HRMPL  |
| Thythy_4    | IHLYG----FWPFPRDAN-G---NVVKYHYDMLKYRYFSNAGP-HRMPL  |
| Calmil_4    | IHLYG----FWPFPKDAN-G---TPVKYHYDNLKYRYFSNAGP-HRMPL  |
| Hetzeb_4    | IHLYG----YWPFPKDAK-G---TPVKYHYDNLKYRYFSNVGP-HRMPL  |
| Rhityp_4    | IHLYG----YWPFPKDSK-G---VPVKYHYDNLKYRYFSNAGP-HRMPL  |
| Scytor_4    | IHLYG----YWPFPKDSK-G---TPVKYHYDNLKYRYFSNAGP-HRMPL  |
| Squaca_4    | IHLYG----YWPFPKDAK-G---APVKYHYDNLKYRYFSNAGP-HRMPL  |
| Amical_4    | IHLYG----FWPFPKDTK-G---RLVKYHYDELKYRYFSNASP-HRMPL  |
| Lepocu_4    | IHLYG----FWPFPKDSQ-G---RPVKYHYDELKYRYFSNASP-HRMPL  |
| Agema_4     | IHLYG----FWPFPKDAS-G---NPVKYHYDMLKYRYFSNASP-HRMPL  |
| Anocar_4    | IHLYG----FWPFPRDIN-G---KTVKYHYDDLKYRYFSNASP-HRMPL  |
| Canlupfam_4 | IHLYG----FWPFPKDLN-G---KAVKYHYDDLKYRYFSNASP-HRMPL  |
| Crigri_4    | IHLYG----FWPFPKDLN-G---KAVKYHYDDLKYRYFSNASP-HRMPL  |
| Galgai_4    | IHLYG----FWPFPKDLH-G---KPVKYHYDDLKYRYFSNASP-HRMPL  |
| Mesaur_4    | IHLYG----FWPFPKDLN-G---KAVKYHYDDLKYRYFSNASP-HRMPL  |
| Homsap_4    | IHLYG----FWPFPKDLN-G---KAVKYHYDDLKYRYFSNASP-HRMPL  |
| Notscuscu_4 | IHLYG----FWPFPKDIN-G---KPVKYHYDDLKYRYFSNASP-HRMPL  |
| Psetextex_4 | IHLYG----FWPFPKDIN-G---KPVKYHYDDLKYRYFSNASP-HRMPL  |
| Musmus_4    | IHLYG----FWPFPKDLN-G---KAVKYHYDDLKYRYFSNASP-HRMPL  |
| Pogvit_4    | IHLYG----FWPFPKDMN-G---KPVKYHYDDLKYRYFSNASP-HRMPL  |
| Promuc_4    | IHLYG----FWPFPKDIN-G---KPVKYHYDDLKYRYFSNASP-HRMPL  |

|              |                                                    |
|--------------|----------------------------------------------------|
| Pantro_4     | IHLYG----FWPFPKDLN-G---KAVKYHYYDDLKYRYFSNASP-HRMPL |
| Pytbiv_4     | IHLYG----FWPFPKDIN-G---KPVKYHYYDDLKYRYFSNASP-HRMPL |
| Ratnor_2     | IYLYG----FWPFPDLQN-Q---NPVKYHYYDSLKYGYTSQASP-HTML  |
| Ratnor_4     | IHLYG----FWPFPKDLN-G---KAVKYHYYDDLKYRYFSNASP-HRMPL |
| Siltro_2     | IYLYG----FWPFPDLH-Q---NPVKYHYYDSLKYGYTSQAGP-HAMPL  |
| Siltro_4     | IHLYG----FWPFPKDVY-G---NQVKYHYYDELKYKYFSNAGP-HRMPL |
| Susscr_4     | IHLYG----FWPFPKDLN-G---KAVKYHYYDDLKYRYFSNASP-HRMPL |
| Taegut_4     | IHLYG----FWPFPKDLH-G---KPVKYHYYDDLKYRYFSNASP-HRMPL |
| Termextri_4M | IHLYG----FWPFPKDFY-G---KPVKYHYYDDLKYRYFSNASP-HRMPL |
| Thasirsir_4  | IHLYG----FWPFPKDIN-G---KPVKYHYYDDLKYRYFSNASP-HRMPL |
| Xenlae_4B    | IYLYG----FWPFTKDVY-G---NQVKYHYYDELKYKYFSNAGP-HRMPL |
| Xenlae_4A    | IHLYG----FWPFPKDVH-G---NQVKYHYYDELKYKYFSNAGP-HRMPL |
|              | 251                                                |
| Latcal_3     | EFKLLYKMHTEGLLKLTLSHCA---                          |
| Perflu_3     | EFKLLYKMHTEGLLKLSLSHCA---                          |
| Serdum_3     | EFKLLYKMHEGLLKLSLSHCA---                           |
| Stepar_3     | EFKLLYKMHTEGLLKLSLSHCA---                          |
| Tetcal_3     | EFKLLFKLHTEGLTKLTLSHCA---                          |
| Monalb_3     | EFKLLYKMHEGLLKLTLSRCA---                           |
| Molmol_3     | EFKLLYRMHTEGLLKLTLSHCA---                          |
| Takrub_3     | EFKLLYKMHREGLLKLSLSHCA---                          |
| CanlupFam_3  | EFQLLYRMHGEGLTKLTLSHCA---                          |
| Bostau_3     | EFQLLYRMHGEGLTKLTLSHCA---                          |
| Homsap_3     | EFQLLYRMHGEGLTKLTLSHCA---                          |
| Siltro_3     | EFKLLYKMHREGLTKLTLSQCA---                          |
| Anocar_3     | EFQQLFRMHSEGLAKLTLSHCA---                          |
| Musmus_3     | EFQLLYRMHGEGLTKLTLSHCA---                          |
| Pantro_3     | EFQLLYRMHGEGLTKLTLSHCA---                          |
| Ratnor_3     | EFQLLYRMHGEGLTKLTLSHCA---                          |
| Galgai_3     | EFQLLYRMHGEGLAKLTLSRCA---                          |
| Lepocu_3     | EFKLLYKMHTEGLLKLSLSHCA---                          |
| Tetnig_3     | EFKLLYKMHREGVLKLSLSHCG---                          |
| Squaca_3     | EFKLLFKLHTDGLTKLTLSHCA---                          |
| Perfla_3     | EFKLLYKMHTEGLLKLSLSHCA---                          |
| Salsal_3     | EFKLLYRMHTEGLLKLTLSHCA---                          |
| Serlaldor_3  | EFKLLYKMHEGLLKLSLSHCA---                           |
| Treber_3     | EFKLLYKLHREGVIKLSVTHCS---                          |
| Cynsem_3     | EFKLLYKMHTEGLLKLSLSHCA---                          |
| Paroli_3     | EFKLLYKLHREGVTKLSLTHCT---                          |
| Paroli_3b    | EFKLLYKMHTEGXKLSLSHCA---                           |
| Plaste_3     | EFKLLYQLHREGVTKLSLTHCA---                          |
| Plaste_3b    | EFKLLYKMHTEGLLKLSLSHCG---                          |
| Ercal3       | EFKLLYKMHEEGLTKLTLSHCA---                          |
| Calmil_3b    | EFKILFKMHTAGLTKLSLSPCV---                          |
| Hetzeb_3     | EFKLLFKLHTDGLTKLTLSHCA---                          |
| Latcha_3     | EFKLLYKMHGEGLTKLTLSHCA---                          |
| Anates_3     | EFKLLYKMHEGLLKLTLSHCA---                           |
| Ampcit3      | EFKLLYKMHTEGLLKLSVSHCA---                          |
| Auslim_3     | EFKLLYKMMDGLLKLTLSHCA---                           |
| Cypvar_3     | EFKLLYKMHTEGLLKLSLSHCA---                          |
| Krymar_3     | EFKLLYRMHTDGLLKLTLSHCA---                          |
| Funhet_3     | EFKLLYQMHTEGLLKLSLSHCA---                          |
| Gamaff3      | EFKLLYKMHTEGLLKLSLSHCA---                          |
| Orylat_3     | EFKLLHKMHTEGLLKLTLSHCA---                          |
| Orenil_3     | EFKLLYKMHTEGLLKLSLSHCA---                          |
| Mayzeb_3     | EFKLLYKMHTEGLLKLSLSHCA---                          |
| Punnye_3     | EFKLLYKMHTEGLLKLSLSHCA---                          |
| Punnye_3a    | EFKLLYKMHTEGLLKLSLSHCA---                          |
| Neobri_3     | EFKLLYKMHTEGLLKLSLSHCA---                          |
| Misang_3     | EFKLLFKMHTEGILKLSLSHCT---                          |
| Sinrhi3      | EFKLLFKMHADGVLKLSLSHCT---                          |
| Singra_3     | EFKLLFKMHADGVLKLSLSHCA---                          |
| Hapbur_3     | EFKLLYKMHTEGLLKLSLSHCA---                          |
| Astcal_3     | EFKLLYKMHTEGLLKLSLSHCA---                          |
| Notfur_3     | EFKLLYKMHTDGVKLSLSHCA---                           |
| Cypcar_3     | -----                                              |
| Poefor3      | EFKLLYKMHTEGLLKLSLSHCA---                          |
| Poelat_3     | EFKLLYKMHTEGLLKLSLSHCA---                          |
| Poeret_3     | EFKLLHRMHSEGLLKLSLSHCA---                          |
| Angang_3     | EFKLLYKMHTDGVIKLSLSHCA---                          |
| Xipmac_3     | EFKLLYKMHTEGLLKLSLSHCA---                          |
| Masarm_3     | EFKLLYKMHEGLLKLTLSHCA---                           |
| Permag_3     | EFKLLYRMHTEGLLKLSLSHCA---                          |
| Gnapet3      | EFKQLYKMHAEGLTKLSLSHCI---                          |
| Ostbic_3     | EFKLLYKMHEEGLTKLSLARCA---                          |
| Gadmor_3     | EFKLLYKMHTKGLLKLNLSHCA---                          |
| Scifor_3     | EFKLLYKMHQGLAKLSLARCA---                           |

|             |                              |
|-------------|------------------------------|
| Acapol3     | EFKLLYKMHT EGLLKL SL SHCA--- |
| Ampoce_3    | EFKLLYKMHEGLLKL SL SHCA---   |
| Scflor_3b   | EFKLLHSLHMEGVVQLNLS PCA---   |
| Ostbic_3b   | EFKLLHSLHMEX-----            |
| Parkin_3    | EFKQLYKMHAEGLTKL SL SHCI---  |
| Amppe3      | EFKLLYKMHEGLLKL SL SHCA---   |
| Oncmyk_3    | EFKLLYKMHT EGLIKL TL SHCA--- |
| Gasacu_3    | EFKLLYKMHT QGLLKL SL SHCA--- |
| Labber_3    | EFKLLYKMHT EGLLKL SL SHCA--- |
| Panbuc_3    | EFKFLYKMHT EGLIRL TL TPCI--- |
| Parhas3     | EFKLLFKMHT EGVKL SL SHCT---  |
| Cluhar_3    | EFKLLFKMHT EGLLKL TL SHCA--- |
| Aloalo_3    | EFKLLFKMHT EGLLKL TL SHCA--- |
| Panhyp_3    | EFKLLFKMHT EGIKL SL SHCA---  |
| Eleele_3    | EFKLLFRMHT EGVKL SL SHCT---  |
| Denclu_3    | EFKLLFKMHT EGLLKL SL SHCA--- |
| Sarpil_3    | EFKLLFKMHT EGLLKL TL THCA--- |
| Eigvir_3    | EFKLLFKMHT EGVKL SL SHCT---  |
| Aptalb_3    | EFKLLFKMHT EGVKL SL SHCT---  |
| Sinans_3    | EFKLLFKMHADGVKL SL SHCA---   |
| Pygnat_3    | EFKLLFKMHT EGVKL SL SHCT---  |
| Astmex_3    | EFKLLFKMHT EGVKL SL SHCA---  |
| Caraur_3    | EFKLLFKMHADGVKL SL SHCA---   |
| Danrer_3    | EFKLLFKMHADGVKL SL SHCA---   |
| Ictpun_3    | EFKLLFKMHT DGILKL SL SHCA--- |
| Plealt_3    | EFKLLYKMHT EGLLKL TL SHCA--- |
| Plealt_9    | EFKLLYKMHGEGVTRMSL SHCT---   |
| Gasacu_9    | EFKLLYKLHRDGVIKL SL THCS---  |
| Parkin_9    | EFKLLHTLHTEGMVRLSVAPCA---    |
| Acapol_9    | EFKLLYKLHREGVIKLG L THCS---  |
| Larcro_9    | EFKLLYKLHREGVIKLS L THCT---  |
| Notcor_9    | EFKLLYKLHREGVIKLS V THCS---  |
| Latcal_9    | EFKLLYKLHREGVTKLS L THCT---  |
| Serlaldor_9 | EFKLLYKLHREGVTKLS L THCT---  |
| Monalb_9    | EFKLLYKLYKEGVTKLS L THCP---  |
| Serdum_9    | EFKLLYKLHREGVTKLS L THCT---  |
| Perflu_9    | EFKLLYKLHREGVIKLS L THCS---  |
| Perfla_9    | EFKLLYKLHREGVIKLS L THCS---  |
| Stepar_9    | EFKLLYKLHRDGVIKL SL THCS---  |
| Molmol_9    | EFKLLYKLHREGVIKLS L THCA---  |
| Hipcom_9    | EFKLLYRLHRDGVTKLS L THCT---  |
| Takrub_9 B  | EFKLLYKLHREGVIRLS L THCT---  |
| Takrub_9    | EFKLLYKLHREGVIRLS L THCT---  |
| Cynsem_9    | EFKLLYKLHREGVTKLS L THCT---  |
| Scomax_9    | EFKLLYKLHREGVTKLS L THCA---  |
| Corlav_9    | EFKLLYKMHGEGVTKLS L SHCS---  |
| Oncmyk_9    | EFKLLYKMHGEGVTKLS L SHCS---  |
| Salsal_9    | EFKLLYRMHT EGLIKL TL SHCA--- |
| Onctsh_9    | EFKLLYKMHGEGVTKLS L SHCS---  |
| Salalp_9    | EFKLLYKMHGEGVTKLS L SHCS---  |
| Ampoce_9    | EFKLLYKLHREGVIKLG L THCS---  |
| Amppe9      | EFKLLYKLHREGVIKLG L THCS---  |
| Labber_9    | EFKLLYKLHREGVIRLS L THCS---  |
| Umbpyg_3B   | EFKLLYKMHT EGLIKL TL SHCA--- |
| Esoluc_3b   | EFKLLYKMHT EGLIKL TL SHCA--- |
| Gadmor_9    | EFRLLYKMHGEGVTKLS L SHCA---  |
| Umbpyg_9    | EFKLLYKMHAEGVTKLS L SHCS---  |
| Esoluc_9    | EFKLLYKMHGEGVTKLS L SHCS---  |
| Permag_9    | EFKLLYKLHREGAIKLS L THCS---  |
| Bolpec_9    | EFKLLYKLHREGAIKLS L THCS---  |
| Poefor9     | EFKLLYKLHREGVIKLS L THCT---  |
| Masarm_9    | EFKLLYKLHREGVIKLS L THCI---  |
| Angjap_9    | EFKLLYKMHT DGVIKLS L SHCA--- |
| Poelat_9    | EFKLLYKLHREGVIKLS L THCT---  |
| Poeret_9    | EFKLLYKLHREGVIKLS L THCT---  |
| Xipmac_9    | EFKLLYKLHREGVIKLS L THCA---  |
| Hapbur_9    | EFKLLYKLHREGVIKLS L THCS---  |
| Orylat_9    | EFKLLYKLHREGVTKLGL SHCT---   |
| Gamaff_9    | EFKLLYKLHREGVIKLS L THCA---  |
| Neobri_9    | EFKLLYKLHREGVIKLS L THCS---  |
| Funhet_9    | EFKLLYKLHREGVTKLS L THCT---  |
| Punnye_9    | EFKLLYKLHREGVIKLS L THCS---  |
| Cypvar_9    | EFKLLYKLHREGVTKLS L THCT---  |
| Krymar_9    | EFKLLYKLHREGVIKLS L THCI---  |
| Notfur_9    | EFKLLYKLHREGVTKLS L THCS---  |
| Notpie_9    | EFKLLYKLHREGVTKLS L TRCS---  |
| Orenil_9    | EFKLLYKLHREGVIKLS L THCS---  |

|             |                            |
|-------------|----------------------------|
| Auslim_9    | EFKLLYKLHREGVTKLSLTHCT---  |
| Anates_9    | EFKLLYKLHREGVTKLSLTHCT---  |
| Astcal_9    | EFKLLYKLHREGVIKLSLTHCS---  |
| Mayzeb_9    | EFKLLYKLHREGVIKLSLTHCS---  |
| Orymel_9    | EFKLLYKLHREGVTKLGLSHCT---  |
| Ampcit_9    | EFKLLYKLHREGVIKLSLTHCT---  |
| Macfas_2    | EFKALKSLHEQGALKLTVGQCD---  |
| Macmul_2    | EFKALKSLHEQGALKLTVGQCD---  |
| Macnem_2    | EFKALKSLHEQGALKLTVGQCD---  |
| Musmus_2    | EFKALKSLHEQGALKLTVGQCD---  |
| Ponabe_2    | EFKALKSLHEQGALKLTVGQCD---  |
| Papanu_2    | EFKALKSLHEQGALKLTVGQCD---  |
| Nomleu_2    | EFKALKSLHEQGALKLTVGQCD---  |
| Pantro_2    | EFKALKSLHEQGALKLTVGQCD---  |
| Latcha_2    | EFRTLYGLHQGALKLTVGECA---   |
| Gnapet_2    | EFKTLRALHRQGALCLHTEACS---  |
| Panbuc_2b   | EFQALKVLHERGALQLHTGLCH---  |
| Ostbic_2    | EFETLKALHRQGALRLHTGTCTN--- |
| Sinrhi_2    | EFRTLALHRQGALRLHTGPCQ---   |
| Hetzeb_2    | EFKTLRNMHLQGALKLNVGECN---  |
| Hipcom_2    | EFRTLALHHQGALRLHTGNCH---   |
| Prigla_2    | EFKTLRNMHLQGALKLNVGECK---  |
| Scytor_2    | EFKTLRNMHLQGALKLNVGECK---  |
| Tetcal_2    | EFKTLKNMHLRGALRLNVGECN---  |
| Rhityp_2    | EFKTLRNMHLQGALKLNVGACR---  |
| Parkin_2b   | EFRTLRLHALGVLQLHTGSCR---   |
| Angang_2    | EFSTLRDLHSQGALRLHIGRCG---  |
| Pygnat_2    | EFRTLMLHRKGALRLHTGTCTN---  |
| Parkin_2    | EFKTLRALHRQGALCLHTEACS---  |
| Gorgor_2    | EFKALKSLHEQGALKLTVGQCD---  |
| Thegel_2    | EFKALKSLHEQGALKLTVGQCD---  |
| Tupchi_2    | EFKALKSLHEQGALKLTVGQCD---  |
| Galgai_2    | EFKALKTLHQGALKLTVGECE---   |
| Eleele_2    | EFRTLSTLHSQGALQLHTGTCTN--- |
| Danrer_2    | EFRTLALHRQGALRLHTGPCQ---   |
| CanlupFam_2 | EFKALKSLHEQGALKLTVGQCD---  |
| Aloalo_2    | EFRTLSSLHRQGALRLHTSACS---  |
| Astmex_2    | EFRTLSTLHRQGALRLHTGTCTN--- |
| Sinans_2    | EFRTLALHRQGALQLHTGPCQ---   |
| Scifor_2    | EFETLRALHRQGALRLHTGACN---  |
| Ceraty_2    | EFKALKSLHEQGALKLTVGQCD---  |
| Anocar_2    | EFKALKALHQGALKLTVGACD---   |
| Anates_2    | EFRTLALHRQGALRLHTGTCTN---  |
| Ampbic_2    | EFRTLSTLHRQGALRLHTGTCTN--- |
| Sarpil_2    | EFRTLSSLHRQGALRLHTSACS---  |
| Xenlae_2    | EFKALKNLHLQGALKLNVGECE---  |
| Cluhar_2    | EFRTLSTLHKQGALRLHTSSCS---  |
| Cypcar_2    | EFRTLALHRQGALRLHTGPCQ---   |
| Denclu_2    | EFRTLALHRQGALRLHTGTCTN---  |
| Notpie_2    | EFRTLSSLHRQGALRLHTGTCTN--- |
| Ercal_2     | EFQALQRLHQGALKLNVGDCV---   |
| Amical_2    | EFKTLKNLHSQGALQLHTGPCN---  |
| Lepocu_2    | EFKALKSLHEQGALKLHTGECN---  |
| Homsap_2    | EFKALKSLHEQGALKLTVGQCD---  |
| Bostau_2    | EFKALKSLHEQGALKLTVGQCD---  |
| Caraur_2    | EFRTLALHRQGALRLHTGPCQ---   |
| Thythy_2B   | EFRTLSSLHRQGALRLHTGSCD---  |
| Onctsh_2B   | EFRTLSSLHRQGALRLHTGSCD---  |
| Salsal_2B   | EFRTLSSLHRQGALRLHTGSCD---  |
| Oncmyk_2B   | EFRTLSSLHRQGALRLHTGSCD---  |
| Onckis_2B   | EFRTLSSLHRQGALRLHTGSCD---  |
| Salsal_2A   | EFRTLSSLHRQGALRLHTGSCD---  |
| Thythy_2A   | EFRTLSSLHRQGALQLNTGSCD---  |
| Salalp_2A   | EFRTLSSLHRQGALRLNTGSCD---  |
| Corlav_2A   | EFRTLSSLHRQGALRLNTGSCD---  |
| Cormar_2A   | EFRTLSSLHRQGALRLNTGSCD---  |
| Onctsh_2A   | EFRTLSSLHRQGALRLNTGSCD---  |
| Oncmyk_2A   | EFRTLSSLHRQGALRLNTGSCD---  |
| Neobri_2    | EFRTLSTLHRQGALRLHTGVCG---  |
| Takrub_2    | EFRTLSSLHRQGALQLHTGPCD---  |
| Tetnig_2    | EFRTLSTLHRQGALRLHSGPCA---  |
| Orenil_2    | EFRTLSTLHRQGALRLHTGVCG---  |
| Orylat_2    | EFRTLSTLHRQGALRLHTGSCE---  |
| Krymar_2    | EFRTLSSLHRQGALRLHTGICH---  |
| Notfur_2    | EFRTLSSLHRQGALRLHTGTCTN--- |
| Poelat_2    | EFRTLSTLHRQGALRLHTGSCD---  |
| Gadmor_2    | EFRTLNTLHRKGALRLHTGTCTN--- |

|             |                           |
|-------------|---------------------------|
| Xipmac_2    | EFRTLSTLHRQGALRLHTGSCD--- |
| Poeret_2    | EFRTLSTLHRQGALRLHTGSCD--- |
| Astcal_2    | EFRTLSTLHRQGALRLHTGVCG--- |
| Hapbur_2    | EFRTLSTLHRQGALRLHTGVCG--- |
| Acapol_2B   | EFRTLSALHRQGALRLHTGTCD--- |
| Ampoce_2A   | EFRTLSTLHRQGALRLHTGTCD--- |
| Acapol_2A   | EFRTLSALHRQGALRLHTGTCD--- |
| Mayzeb_2    | EFRTLSTLHRQGALRLHTGVCG--- |
| Punnye_2    | EFRTLSTLHRQGALRLHTGVCG--- |
| Latcal_2    | EFRTLSTLHRQGALRLHTGTCD--- |
| Singra_2    | EFRTLSALHRQGALQLHTGPCK--- |
| Auslim_2    | EFRTLSSLHRQGALRLHTGTCD--- |
| Monalb2     | EFRTLSTLHRQGALRLHTGPCD--- |
| Ampoce_2B   | EFRTLSTLHRQGALRLHTGTCD--- |
| Chiham_2    | EFRTLSALHRQGALRLHTGTCD--- |
| Gasacu_2    | EFRTLSALHRQGALRLHTGTCD--- |
| Gymacu_2    | EFRTLSALHRQGALRLHTGTCD--- |
| Labber_2    | EFRTLSALHRQGALRLHTGSCD--- |
| Cypvar_2    | EFRTLSTLHRQGALRLHTGSCD--- |
| Funhet_2    | EFRTLSTLHRQGALRLHTGHCD--- |
| Larcro_2    | EFRTLSALHRQGALQLHTGSCD--- |
| Paroli_2    | EFRTLNTLHRQGALRLHTGTCE--- |
| Perflu_2    | EFRTLSALHRQGALRLHTGTCD--- |
| Serdum_2    | EFRTLSTLHRQGALRLHTGTCD--- |
| Stepar_2    | EFRTLSTLHRQGALRLHTGTCD--- |
| Notcor_2    | EFRTLSALHRQGALRLHTGTCD--- |
| Treber_2    | EFRTLSALHRQGALRLHTGTCD--- |
| Serlaldor_2 | EFRTLSTLHRQGALRLHTGTCD--- |
| Plaste_2    | EFRTLNALHRQGALRLHTGTCD--- |
| Clabat_4    | EFKTLKMLHSGALKLTTSKCR---  |
| Icpun_4A    | EFKTLKMLHSGALKLMTSKCT---  |
| Panhyp_4    | EFKTLKMLHSGALKLTTSKCR---  |
| Umbpyg_4    | EFKTLKILHSGALKLTTSKCT---  |
| Esoluc_4    | EFKTLKMLHSGALKLTTSKCA---  |
| Plealt_4    | EFKTLKMLHSGALKLTTSKCI---  |
| Onckis_4B   | EFKTLKMLHSGALKLTTSKCE---  |
| Onckis_4A   | EFKTLKMLHSGALKLTTSKCE---  |
| Onctsh_4    | EFKTLKMLHSGALKLTTSKCE---  |
| Oncmk_4     | EFKTLKMLHSGALKLTTSKCE---  |
| Corlav_4    | EFKTLKMLHSGALKLTTSKCE---  |
| Astmex_4A   | EFKTLKTLHSGALKLTTSKCR---  |
| Pygnat_4    | EFKTLKMLHSGALKLMTSTCR---  |
| Aloalo_4    | EFKTLKTLHSGALKLTTSKCV---  |
| Cluhar_4    | EFKTLKVLHSGALKLTTSKCM---  |
| Denclu_4    | EFKTLKALHYKGALKLTTSKCT--- |
| Konpun4     | EFKTLKTLHSGALKLTTSKCT---  |
| Sarpil_4    | EFKTLKTLHSGALKLTTSKCV---  |
| Caraur_4    | EFKTLKRLHSGALKLTTSKCT---  |
| Cteide_4    | EFNTLKSILHNGAMKLTTSKCT--- |
| Petmar_4    | EYRTLHRLHSLGALKLTTGKCT--- |
| Cypcar_4    | EFKTLKTLHSGALKLTTSECT---  |
| Danrer_4    | EFQTLQRLHSGALKLTTSKCT---  |
| Misang_4    | EFRTLRTLHNGALKLTTTKCE---  |
| Angjap_4    | -----                     |
| Cypcar_4A   | EFKTLKTLHSGALKLTTSECT---  |
| Angang_4    | EFKTLKTLHSGALKLTTSKCA---  |
| Cypcar_4B   | EFKTLKTLHSGALKLTTSKCT---  |
| Sinans_4A   | EFKTLKTLHSGALKLTTSECT---  |
| Sinans_4B   | EFKTLKRLHSGALKLTTSKCT---  |
| Singra_4A   | EFKTLKTLHSGALKLTTSECT---  |
| Aptalb_4    | EFKTLKMLHSGALKLTTSKC----  |
| Eigvir_4    | EFKTLKMLHSGALKLTTSKCP---  |
| Eleele_4    | EFKTLKMLHSGALKLTTSKCP---  |
| Parhas_4    | EFKTLKMLHSGALKLTTSKCR---  |
| Scifor_4    | EFNTLKMHLHSGALKLTTSKCT--- |
| Gnapet4     | EFKTLKFLHSGALKLTTSKCT---  |
| Ostbic_4    | EFKTLKMLHNGALKLTTLKCT---  |
| Parkin_4    | EFKTLKFLHERGALKLTTSKCT--- |
| Panbuc_4    | EFQTLKALHSGALKLTTSTCT---  |
| Erpcal4     | EFKTLKMLHSGALKLTTSKCL---  |
| Salsal_4    | EFKTLKMLHSGALKLTTSKCE---  |
| Saltru_4    | EFKTLKMLHSGALKLTTSKCE---  |
| Salalp_4    | EFKTLKMLHSGALKLTTSKCE---  |
| Salfon_4    | EFKTLKMLHSGALKLTTSKCE---  |
| Thythy_4    | EFKTLKMLHSGALKLTTSKCE---  |
| Calmil_4    | EFKTLKSLHSGALKLTTGKCG---  |
| Hetzeb_4    | EFKTLKSLHSGALKLTTGKCV---  |



|              |                           |
|--------------|---------------------------|
| Rhityp_4     | EFKTLKSLHDKGALKLTTGKCV--- |
| Scytor_4     | EFKTLKSLHDKGALKLTTGKCV--- |
| Squaca_4     | EFKTLKSLHDKGALKLTTGKCV--- |
| Amical_4     | EFKTLKTLHNKGALKLTTSTCA--- |
| Lepocu_4     | EFKTLKMLHNKGALKLTTTKCT--- |
| Agema_4      | EFKTLKMLHSGALKLTTSKCR---  |
| Anocar_4     | EFKTLNMLHNRGALKLTTGKCA--- |
| Canlupfam_4  | EFKTLNVLHNRGALKLTTGKCV--- |
| Crigri_4     | EFKTLNVLHNRGALKLTTGKCM--- |
| Galgai_4     | EFKTLNVLHNRGALKLTTGKCV--- |
| Mesaur_4     | EFKTLNVLHNRGALKLTTGKCM--- |
| Homsap_4     | EFKTLNVLHNRGALKLTTGKCV--- |
| Notscuscu_4  | EFKTLNMLHNKGALKLTTGKCI--- |
| Psetextex_4  | EFKTLNMLHNKGALKLTTGKCI--- |
| Musmus_4     | EFKTLNVLHNRGALKLTTGKCM--- |
| Pogvit_4     | EFKTLNVLHNRGALKLTTGKCV--- |
| Promuc_4     | EFKTLNMLHNRGALKLTTGKCI--- |
| Pantro_4     | EFKTLNVLHNRGALKLTTGKCV--- |
| Pytbiv_4     | EFKTLNMLHNRGALKLTTGKCI--- |
| Ratnor_2     | EFKALKSLHEQGALKLTVGQCD--- |
| Ratnor_4     | EFKTLNVLHNRGALKLTTGKCM--- |
| Siltro_2     | EFKALKNLHLQGALKLNVGECR--- |
| Siltro_4     | EFKTLNLLHNKGALKLTTGKCI--- |
| Susscr_4     | EFKTLNVLHNRGALKLTTGKCV--- |
| Taegut_4     | EFKTLNVLHNRGALKLTTGKCI--- |
| Termextri_4M | EFKTLHMLHNQGALKLTTGKCV--- |
| Thasirsir_4  | EFKTLNMLHNRGALKLTTGKCI--- |
| Xenlae_4B    | EFKTLNLLHNKGALKLTTGKCI--- |
| Xenlae_4A    | EFKTLNLLHNKGALKLTTGTCT--- |
