# Supplementary figures and images for: Vertebrate Alpha2,8-Sialyltransferases (ST8Sia): A Teleost Perspective
Source: MDPI journal article supplement (doi:10.3390/ijms21020513), 2020-01-14

## Poly- $\alpha$ 2,8-sialyltransferases

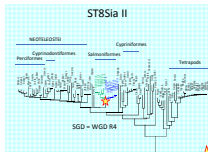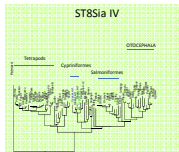

WGD R1  
552 MYA

## Oligo- $\alpha$ 2,8-sialyltransferases

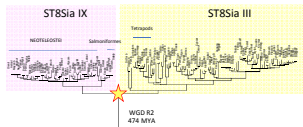

WGD R2  
474 MYA

Supplement: s1 [file s1]
